# Supplementary material for: Synthesis and conformational preferences of peptides and proteins with cysteine sulfonic acid
Source: Royal Society of Chemistry journal article supplement (doi:10.1039/d3ob00179b), 2023-01-01
Supplement: d3ob00179b2.xlsx [file d3ob00179b2.xlsx]

## Sheet: CYS
PDB ID	Resolution	Chain	Residue	Structure CYS	Structure NextRes	Structure PrevRes	Phi CYS	Psi CYS	Omega CYS	Chi1 CYS	Phi NextRes	Psi NextRes	Omega NextRes	Phi PrevRes	Psi PrevRes	Omega PrevRes	Region CYS	Region NextRes	Region PrevRes	<A C=O---C=O P	O---C=O distance Prev	O---C=O distance Next	PrevRes	NextRes	O--C distNext	O--Cdist Prev
1BKR	1.1	A	12	HELIX	HELIX	HELIX	-60.9154	-44.1399	-179.969	-69.6513	-62.1264	-41.795	-175.226	-55.7582	-47.8695	-179.951	Alpha-R	Alpha-R	Alpha-R	102.466	2.91439	2.97509	TRP	GLN	2.97509	2.91439
1BYI	0.97	A	20	HELIX	HELIX	HELIX	-65.5853	-40.046	175.46	-68.401	-60.5447	-44.9236	177.425	-57.9127	-43.6827	-179.248	Alpha-R	Alpha-R	Alpha-R	100.764	2.99962	2.95054	SER	ALA	2.95054	2.99962
1BYI	0.97	A	151	HELIX	HELIX	N/A	-68.1101	-30.3004	-178.322	67.964	-64.5448	-51.1799	176.909	95.2924	-7.07081	-171.49	Alpha-R	Alpha-R	Alpha-L	94.9167	3.00722	2.9355	GLY	ILE	2.9355	3.00722
1C75	0.97	A	35	HELIX	HELIX	HELIX	-102.341	-36.8495	-170.72	-57.9703	-98.5412	-1.4974	176.81	-60.0656	-31.8089	176.437	Alpha-R	Alpha-R	Alpha-R	128.012	3.67691	3.54246	SER	HIS	3.54246	3.67691
1C75	0.97	A	32	HELIX	HELIX	HELIX	-118.239	-22.4926	-170.044	-45.4714	-76.2176	-19.5764	179.816	-115.693	-14.2185	-168.806	N/A	Alpha-R	N/A	118.29	3.76304	3.16291	LYS	ILE	3.16291	3.76304
1CC8	1.02	A	18	HELIX	HELIX	HELIX	-74.3558	-47.3035	171.377	-68.917	-56.0381	-38.0524	177.919	-67.0596	-29.2581	179.92	Alpha-R	Alpha-R	Alpha-R	103.567	3.13297	2.9159	GLY	SER	2.9159	3.13297
1CC8	1.02	A	15	N/A	HELIX	N/A	-161.501	172.777	176.211	77.8726	-60.116	-21.8793	175.914	-87.1641	-15.2303	-173.97	Beta	Alpha-R	Alpha-R	120.688	4.26187	2.98295	THR	SER	2.98295	4.26187
1CXQ	1.02	A	125	HELIX	HELIX	HELIX	-68.8514	-17.8511	-179.712	-41.675	-102.838	-23.2899	-175.858	-61.7086	-29.6072	178.445	Alpha-R	Alpha-R	Alpha-R	112.219	3.04876	3.66439	SER	PHE	3.66439	3.04876
1D4T	1.1	A	42	SHEET	SHEET	SHEET	-123.508	119.923	171.216	-66.9178	-88.8348	112.93	-169.245	-124.535	163.396	177.991	Beta	Beta	Beta	128.267	3.91184	3.53494	TYR	LEU	3.53494	3.91184
1D4T	1.1	A	44	SHEET	SHEET	SHEET	-110.296	120.47	-170.889	-57.6488	-125.494	124.835	179.448	-88.8348	112.93	-169.245	Beta	Beta	Beta	128.327	3.69246	3.96753	LEU	VAL	3.96753	3.69246
1D5T	1.04	A	414	HELIX	HELIX	HELIX	-57.5095	-41.9464	177.669	-178.227	-60.3116	-40.8026	178.316	-66.8132	-46.6834	175.518	Alpha-R	Alpha-R	Alpha-R	103.14	2.8878	2.85095	THR	ASN	2.85095	2.8878
1D5T	1.04	A	400	SHEET	N/A	SHEET	-101.684	138.722	172.563	-177.831	-81.766	165.525	170.227	-111.039	102.024	-172.687	Beta	Beta	Beta	93.2703	3.59288	3.45498	PHE	SER	3.45498	3.59288
1D5T	1.04	A	17	HELIX	HELIX	HELIX	-62.7381	-42.3734	-178.963	-70.7056	-65.2376	-46.0847	177.472	-62.2337	-43.4433	-178.608	Alpha-R	Alpha-R	Alpha-R	98.2369	2.94443	2.95115	GLU	ILE	2.95115	2.94443
1D5T	1.04	A	402	N/A	N/A	N/A	-89.7646	149.323	168.474	-66.5995	-59.4487	161.078	179.571	-81.766	165.525	170.227	Beta	Beta	Beta	86.1546	3.52901	2.91561	SER	SER	2.91561	3.52901
1D5T	1.04	A	302	SHEET	SHEET	SHEET	-123.354	116.805	171.079	-58.6952	-83.9495	127.203	178.219	-80.5207	127.623	-176.914	Beta	Beta	Beta	119.214	3.90959	3.38252	ILE	ILE	3.38252	3.90959
1D5T	1.04	A	277	N/A	N/A	SHEET	-151.62	159.969	175.857	56.9536	-89.6659	-36.4781	-174.597	-73.1443	153.652	176.769	Beta	Alpha-R	Beta	109.454	4.20639	3.52097	ARG	LYS	3.52097	4.20639
1D5T	1.04	A	335	SHEET	SHEET	SHEET	-112.509	146.559	-176.057	59.0033	-133.245	131.056	172.944	-133.937	121.531	166.088	Beta	Beta	Beta	123.332	3.77473	3.96418	VAL	MET	3.96418	3.77473
1D5T	1.04	A	317	SHEET	SHEET	N/A	-164.341	155.096	165.653	62.1333	-97.8918	139.31	171.937	-165.202	145.642	178.211	Beta	Beta	Beta	114.669	4.19938	3.72842	SER	GLN	3.72842	4.19938
1D5T	1.04	A	282	SHEET	N/A	SHEET	-157.285	166.901	166.315	65.0645	-89.2131	164.208	-175.148	-114.41	137.479	179.021	Beta	Beta	Beta	94.3717	4.13879	3.54427	ILE	ASP	3.54427	4.13879
1D5T	1.04	A	202	HELIX	HELIX	N/A	-69.8044	-22.4231	-171.851	65.9799	-53.8271	-46.0598	-174.906	-57.2542	142.757	-174.062	Alpha-R	Alpha-R	Beta	98.5768	3.11375	2.75876	PRO	LEU	2.75876	3.11375
1DS1	1.08	A	199	SHEET	N/A	SHEET	-142.048	124.413	171.164	-171.179	-69.1092	166.456	-179.874	-60.1854	140.333	-178.649	Beta	Beta	Beta	85.0834	4.10668	3.10395	PRO	CYS	3.10395	4.10668
1DS1	1.08	A	200	N/A	N/A	SHEET	-69.1092	166.456	-179.874	-66.7197	-109.818	161.9	174.637	-142.048	124.413	171.164	Beta	Beta	Beta	105.072	3.10395	3.7314	CYS	VAL	3.7314	3.10395
1DS1	1.08	A	6	N/A	N/A	SHEET	-99.707	6.55975	-176.254	-65.4562	-51.1113	-45.2477	-175.613	-84.9723	112.283	-174.778	Alpha-R	Alpha-R	Beta	102.543	3.60969	2.79885	ASP	THR	2.79885	3.60969
1DS1	1.08	A	161	SHEET	SHEET	SHEET	-100.215	120.109	167.557	176.839	-91.1782	-44.5049	171.023	-111.551	131.873	-176.103	Beta	Alpha-R	Beta	103.715	3.54128	3.5947	ALA	SER	3.5947	3.54128
1ETL	0.89	A	10	N/A	N/A	HELIX	-74.7764	-13.4576	-178.637	69.4233	-140.575	140.495	-176.751	45.8757	48.2179	-171.151	Alpha-R	Beta	Alpha-L	117.682	3.07478	4.12157	CYS	ASN	4.12157	3.07478
1EUW	1.05	A	36	N/A	N/A	N/A	-107.463	96.2357	-169.472	-175.299	-135.057	143.491	174.393	-67.4386	128.765	171.984	Beta	Beta	Beta	120.752	3.44792	4.01094	ALA	LEU	4.01094	3.44792
1FSG	1.05	A	203	N/A	N/A	N/A	51.1051	50.14	179.776	-78.5696	83.0039	-16.2815	175.469	98.9088	159.257	175.103	Alpha-L	Alpha-L	N/A	150.112	2.76928	3.48966	GLY	CYS	3.48966	2.76928
1FSG	1.05	A	38	N/A	N/A	N/A	-101.529	-23.7114	-169.781	-70.3832	-53.1924	-42.0658	-177.345	-71.9863	-16.7616	176.659	Alpha-R	Alpha-R	Alpha-R	106.503	3.71491	2.82801	HIS	LYS	2.82801	3.71491
1FSG	1.05	C	204	N/A	N/A	N/A	82.8189	-15.7043	175.581	-65.2179	-74.6284	117.12	-175.256	53.6271	48.5432	-179.803	Alpha-L	Beta	Alpha-L	123.335	3.48684	3.21591	CYS	TYR	3.21591	3.48684
1FSG	1.05	A	76	SHEET	SHEET	SHEET	-84.0176	122.002	176.452	174.077	-89.4267	105.565	-176.394	-111.257	118.196	174.671	Beta	Beta	Beta	135.896	3.37516	3.47073	ILE	ILE	3.47073	3.37516
1GKM	1	A	41	HELIX	HELIX	HELIX	-65.0939	-46.1351	174.425	-116.354	-57.952	-45.1168	-178.522	-62.4715	-32.8048	176.64	Alpha-R	Alpha-R	Alpha-R	99.902	2.97355	2.88596	ALA	VAL	2.88596	2.97355
1GKM	1	A	221	HELIX	HELIX	HELIX	-63.638	-43.0608	179.585	-70.1876	-65.2466	-36.6015	174.895	-66.958	-45.046	-179.628	Alpha-R	Alpha-R	Alpha-R	107.11	2.92484	2.94135	ALA	GLY	2.94135	2.92484
1GKM	1	A	255	HELIX	HELIX	HELIX	-63.8516	-43.9417	176.042	-69.0543	-60.0159	-43.7151	179.67	-62.4419	-38.3095	175.414	Alpha-R	Alpha-R	Alpha-R	101.676	3.00565	2.91075	ALA	PHE	2.91075	3.00565
1GKM	1	A	446	HELIX	HELIX	HELIX	-67.8035	-39.5685	174.215	-67.9206	-59.8428	-48.6972	-176.829	-68.8745	-35.2959	176.493	Alpha-R	Alpha-R	Alpha-R	98.4937	3.02278	2.92653	ALA	GLN	2.92653	3.02278
1GKM	1	A	292	HELIX	HELIX	HELIX	-61.4266	-41.9811	179.602	-65.8308	-63.0385	-44.7274	178.559	-59.7988	-40.8227	177.17	Alpha-R	Alpha-R	Alpha-R	100.84	2.99361	2.94677	ALA	LEU	2.94677	2.99361
1GKM	1	A	284	HELIX	HELIX	HELIX	-100.954	16.8436	174.637	-59.7655	-58.5954	-43.2368	-178.366	-73.7524	-22.0796	176.773	Alpha-R	Alpha-R	Alpha-R	100.247	3.64207	2.83171	ARG	GLN	2.83171	3.64207
1GMX	1.1	A	6	SHEET	SHEET	SHEET	-89.6058	131.951	179.882	-66.7418	-129.868	156.477	176.062	-124.032	147.019	172.822	Beta	Beta	Beta	112.265	3.4192	4.00872	GLU	ILE	4.00872	3.4192
1H4G	1.1	A	83	SHEET	SHEET	SHEET	-158.559	168.773	157.749	62.3067	-96.8706	137.333	-171.834	-116.052	118.732	-165.274	Beta	Beta	Beta	114.608	4.15066	3.67169	LEU	VAL	3.67169	4.15066
1IQZ	0.92	A	17	HELIX	HELIX	HELIX	-73.2528	-38.0624	176.416	52.1969	-66.826	-25.4298	174.705	-82.2432	-34.6949	-171.84	Alpha-R	Alpha-R	Alpha-R	114.802	3.08367	3.06594	ALA	GLY	3.06594	3.08367
1IQZ	0.92	A	14	N/A	HELIX	N/A	-95.3964	-9.44555	177.6	78.9738	74.1726	8.66359	-173.884	60.6581	51.4226	-173.78	Alpha-R	Alpha-L	Alpha-L	132.767	3.57272	3.24133	ALA	GLY	3.24133	3.57272
1IQZ	0.92	A	61	HELIX	N/A	HELIX	-63.1876	124.096	-171.299	172.579	-65.1344	-32.2563	-173.783	-80.5077	-22.0696	-168.433	Beta	Alpha-R	Alpha-R	112.449	2.81588	2.88612	GLY	PRO	2.88612	2.81588
1IQZ	0.92	A	11	N/A	N/A	N/A	-58.9968	136.891	179.495	174.956	-107.864	13.0445	166.717	-109.706	-14.0931	179.675	Beta	Alpha-R	Alpha-R	139.655	2.86131	3.76719	THR	ILE	3.76719	2.86131
1J0P	0.91	A	82	HELIX	HELIX	HELIX	-61.6452	-41.406	-179.61	-179.411	-64.0269	-35.1629	176.401	-57.4722	-51.5499	178.174	Alpha-R	Alpha-R	Alpha-R	106.137	2.88956	2.93268	GLY	HIS	2.93268	2.88956
1J0P	0.91	A	105	N/A	N/A	N/A	-78.2457	-57.816	-178.411	-64.5992	-107.445	87.7474	-172.209	-69.7812	-22.7911	172.292	Alpha-R	Beta	Alpha-R	147.018	3.30324	3.71818	LYS	HIS	3.71818	3.30324
1J0P	0.91	A	33	HELIX	N/A	HELIX	-112.95	-53.4728	176.362	-60.0148	-83.4893	71.1628	-158.005	-72.8179	-18.0189	175.251	N/A	Beta	Alpha-R	160.586	3.86256	3.3493	ASP	HIS	3.3493	3.86256
1J0P	0.91	A	51	N/A	N/A	N/A	-109.966	-125.891	-178.803	-57.138	-94.1043	64.3907	-169.448	85.6016	-2.96017	178.071	Beta	Beta	Alpha-L	169.812	3.80231	3.4503	GLY	HIS	3.4503	3.80231
1J0P	0.91	A	100	N/A	N/A	HELIX	-75.9657	-22.4172	176.698	-53.0735	-144.576	160.107	-178.421	-64.6465	145.895	-179.964	Alpha-R	Beta	Beta	110.894	3.15002	4.1327	GLY	LYS	4.1327	3.15002
1J0P	0.91	A	30	HELIX	HELIX	HELIX	-54.097	-40.9299	-176.571	-49.6119	-73.4132	-4.87985	171.331	-50.4459	141.082	-173.708	Alpha-R	Alpha-R	Beta	132.978	2.75005	3.20216	LYS	GLY	3.20216	2.75005
1J0P	0.91	A	79	HELIX	HELIX	HELIX	-49.8803	-56.4582	-175.103	-47.0155	-67.9122	-40.6177	-179.205	-85.5467	167.766	175.978	Alpha-R	Alpha-R	Beta	102.121	2.73232	3.00738	SER	VAL	3.00738	2.73232
1J0P	0.91	A	46	N/A	N/A	N/A	-59.0393	-35.6866	-176.656	-45.7935	-93.9155	16.7684	172.231	-57.7569	144.068	-172.16	Alpha-R	Alpha-R	Beta	145.468	2.84734	3.57381	LYS	ALA	3.57381	2.84734
1JFB	1	A	352	N/A	N/A	HELIX	-39.326	122.559	179.269	-178.841	-59.3828	-32.1896	-171.488	-47.1334	139.116	-170.491	Beta	Alpha-R	Beta	114.119	2.64739	2.83778	ARG	ILE	2.83778	2.64739
1JFB	1	A	215	HELIX	HELIX	HELIX	-62.9757	-51.8806	-175.32	-74.9089	-73.0944	-41.3323	-170.67	-57.5264	-45.4239	-176.266	Alpha-R	Alpha-R	Alpha-R	100.173	2.92181	3.0814	LEU	THR	3.0814	2.92181
1JFB	1	A	52	HELIX	HELIX	HELIX	-62.9907	-39.8015	176.29	-67.9291	-59.2091	-48.581	-179.948	-62.3519	-42.6872	178.207	Alpha-R	Alpha-R	Alpha-R	98.7366	2.91888	2.92907	VAL	PHE	2.92907	2.91888
1JFB	1	A	280	HELIX	HELIX	HELIX	-71.2184	-22.3789	170.787	-66.1833	-78.1235	-54.8625	-172.221	-59.011	-45.1843	-176.1	Alpha-R	Alpha-R	Alpha-R	97.1056	3.09589	3.33286	LEU	ARG	3.33286	3.09589
1JFB	1	A	133	N/A	N/A	HELIX	-135.876	30.8303	-179.184	58.59	-62.9737	-24.5797	-178.598	64.0552	-176.071	177.134	N/A	Alpha-R	PPII-R	119.65	4.03686	2.97695	GLY	ALA	2.97695	4.03686
1K4I	0.98	A	161	HELIX	HELIX	HELIX	-59.9701	-45.6774	179.655	-73.6826	-61.1278	-48.7276	-177.063	-61.9526	-40.0115	178.489	Alpha-R	Alpha-R	Alpha-R	97.3302	2.83784	2.89136	LEU	ARG	2.89136	2.83784
1K4I	0.98	A	118	HELIX	HELIX	HELIX	-63.3193	-45.9035	-179.616	-67.5699	-62.9337	-37.5723	179.516	-59.1184	-42.9808	-179.942	Alpha-R	Alpha-R	Alpha-R	103.983	2.95235	2.89284	ALA	ARG	2.89284	2.95235
1K4I	0.98	A	66	SHEET	SHEET	N/A	-113.312	161.477	-177.223	-61.553	-131.432	89.1388	177.001	-85.3255	117.725	-177.359	Beta	Beta	Beta	145.848	3.80778	3.99665	ILE	ALA	3.99665	3.80778
1K4I	0.98	A	199	HELIX	HELIX	HELIX	-71.2315	-36.8694	177.575	-60.9169	-66.4118	-42.3934	-179.759	-68.9068	-30.086	-179.566	Alpha-R	Alpha-R	Alpha-R	99.8522	3.10896	2.96186	GLU	VAL	2.96186	3.10896
1K4I	0.98	A	211	SHEET	SHEET	SHEET	-154.144	178.088	176.361	64.4629	-113.103	151.623	174.397	-139.703	139.577	-177.861	Beta	Beta	Beta	115.695	4.14771	3.78802	VAL	THR	3.78802	4.14771
1K5C	0.96	A	167	N/A	SHEET	N/A	-97.8626	165.21	-179.45	-67.1665	-132.644	128.062	177.534	61.0801	25.9392	-179.354	Beta	Beta	Alpha-L	122.236	3.52339	4.04107	ASN	ILE	4.04107	3.52339
1K5N	1.09	A	67	SHEET	SHEET	SHEET	-61.9242	-45.1571	-179.212	-69.86	-63.4237	-40.2401	177.585	-61.5833	-46.0977	179.249	Alpha-R	Alpha-R	Alpha-R	103.425	2.94599	2.92304	ILE	LYS	2.92304	2.94599
1KJQ	1.05	B	31	HELIX	HELIX	HELIX	-68.8955	-45.8928	179.92	-76.9136	-58.2387	-35.0284	-179.363	-66.4931	-34.0991	175.97	Alpha-R	Alpha-R	Alpha-R	109.921	3.02664	2.93517	GLU	GLN	2.93517	3.02664
1KJQ	1.05	B	218	N/A	N/A	SHEET	-84.1676	157.638	176.262	-68.0503	-59.8877	146.099	-177.993	-119.004	143.888	172.884	Beta	Beta	Beta	91.9503	3.29905	2.8494	PHE	ALA	2.8494	3.29905
1KJQ	1.05	B	271	SHEET	N/A	SHEET	-127.926	95.3324	-176.506	-52.5994	70.4116	-119.718	179.796	-118.867	126.096	179.063	Beta	PPII-R	Beta	120.869	3.93314	2.9914	VAL	GLY	2.9914	3.93314
1KJQ	1.05	B	152	SHEET	SHEET	N/A	-152.338	164.016	179.832	64.2081	-118.862	136.172	178.664	-86.3092	170.967	179.634	Beta	Beta	Beta	123.927	4.17808	3.7868	PRO	ILE	3.7868	4.17808
1KJQ	1.05	B	104	HELIX	HELIX	N/A	-165.24	154.256	-178.316	74.3026	-63.6893	-36.8648	-179.504	-78.2727	-32.664	174.141	Beta	Alpha-R	Alpha-R	104.418	4.30592	2.96814	PRO	ALA	2.96814	4.30592
1KMV	1.05	A	6	SHEET	SHEET	SHEET	-111.292	146.816	174.736	-64.6755	-136.619	132.933	-175.141	-141.592	144.19	167.328	Beta	Beta	Beta	120.587	3.82602	4.0391	ASN	ILE	4.0391	3.82602
1KWF	0.94	A	106	HELIX	HELIX	HELIX	-64.5122	-29.5202	177.428	-72.3627	-96.1234	15.9552	171.39	-69.4728	-38.9593	178.41	Alpha-R	Alpha-R	Alpha-R	142.636	2.91001	3.59485	VAL	PHE	3.59485	2.91001
1KWF	0.94	A	302	HELIX	HELIX	HELIX	-69.2018	-35.7225	175.338	-69.593	-61.3168	-42.1381	-179.832	-69.3007	-44.6795	-179.318	Alpha-R	Alpha-R	Alpha-R	101.988	3.08253	2.92598	ASN	ASP	2.92598	3.08253
1KWF	0.94	A	240	HELIX	HELIX	HELIX	-56.8788	-48.9904	178.116	-69.4099	-63.6091	-35.2642	177.696	-64.6157	-36.7797	175.783	Alpha-R	Alpha-R	Alpha-R	105.043	2.8486	2.93193	LYS	TYR	2.93193	2.8486
1KWF	0.94	A	191	HELIX	HELIX	HELIX	-115.209	9.01394	172.523	-60.1686	-120.672	128.989	176.859	-107.284	-22.484	-171.745	N/A	Beta	Alpha-R	124.632	3.7779	3.92187	HIS	VAL	3.92187	3.7779
1KWF	0.94	A	261	N/A	N/A	N/A	-161.992	171.164	170.156	62.063	-82.5756	175.262	174.322	-139.883	148.168	175.4	Beta	Beta	Beta	89.4695	4.20057	3.32842	TRP	THR	3.32842	4.20057
1L3K	1.1	A	43	SHEET	SHEET	SHEET	-165.466	113.65	-170.941	-178.048	-138.02	131.743	164.043	-156	154.089	-178.271	Beta	Beta	Beta	123.886	4.1928	4.0335	ASP	VAL	4.0335	4.1928
1L3K	1.1	A	175	N/A	SHEET	SHEET	-98.9239	152.038	170.801	-60.8207	-100.407	120.148	-176.029	-80.0368	108.448	-170.764	Beta	Beta	Beta	128.054	3.5043	3.63848	ASN	GLU	3.63848	3.5043
1LKK	1	A	224	N/A	N/A	N/A	-48.2234	128.163	175	-170.26	-94.1597	137.778	-173.389	-58.0689	150.486	174.228	Beta	Beta	Beta	114.041	2.80524	3.57573	PRO	GLN	3.57573	2.80524
1LKK	1	A	217	N/A	N/A	N/A	-62.8032	-29.4075	-175.923	56.2592	-156.197	164.748	169.025	-66.3097	164.503	176.955	Alpha-R	Beta	Beta	108.36	2.99924	4.24466	LEU	THR	4.24466	2.99924
1LQT	1.05	B	395	N/A	N/A	N/A	-75.3301	155.956	177.883	-64.6391	-65.7643	148.317	173.533	-112.107	7.83993	179.699	Beta	Beta	N/A	94.3568	3.08403	2.96755	GLU	LYS	2.96755	3.08403
1LQT	1.05	B	245	HELIX	HELIX	HELIX	-59.6679	-45.8665	177.068	178.51	-52.5422	-47.0843	-178.512	-62.6739	-45.1437	179.352	Alpha-R	Alpha-R	Alpha-R	98.6107	2.88987	2.79231	VAL	LYS	2.79231	2.88987
1M1Q	0.97	A	78	N/A	N/A	N/A	-127.656	-15.4296	-178.749	-65.0839	-127.733	144.119	-170.907	-66.9563	-21.8009	-171.542	N/A	Beta	Alpha-R	115.489	3.97005	3.96459	SER	HIS	3.96459	3.97005
1M1Q	0.97	A	61	HELIX	N/A	HELIX	-113.659	-48.8151	-178.332	-63.8727	-87.0263	99.5772	174.463	-67.9198	-21.708	174.307	N/A	Beta	Alpha-R	141.928	3.8918	3.37047	ASP	HIS	3.37047	3.8918
1M1Q	0.97	A	38	HELIX	HELIX	HELIX	-96.2596	-42.9536	-169.102	-63.2505	-97.7288	-10.0944	-173.949	-58.8796	-32.2256	177.781	Alpha-R	Alpha-R	Alpha-R	122.892	3.579	3.50526	SER	HIS	3.50526	3.579
1M1Q	0.97	A	18	HELIX	HELIX	HELIX	-115.395	-26.8946	-172.269	-60.6398	-118.155	133.033	175.837	-60.5442	-34.0486	-179.915	N/A	Beta	Alpha-R	123.297	3.87212	3.85746	SER	HIS	3.85746	3.87212
1M1Q	0.97	A	15	HELIX	HELIX	HELIX	-59.7024	-29.6569	179.28	-53.3748	-69.965	-5.76793	171.606	78.6706	177.378	171.541	Alpha-R	Alpha-R	N/A	128.657	2.89028	3.19227	GLY	GLU	3.19227	2.89028
1M1Q	0.97	A	35	HELIX	HELIX	HELIX	-56.0505	-45.6056	-176.076	-47.8183	-68.4439	-29.9929	-179.397	-62.5521	-45.543	-179.985	Alpha-R	Alpha-R	Alpha-R	112.033	2.72604	3.06918	GLN	GLN	3.06918	2.72604
1M1Q	0.97	A	75	N/A	N/A	N/A	-120.774	-10.3264	-168.145	-44.5186	-71.2572	-16.9997	-178.214	-104.941	-178.227	-161.149	N/A	Alpha-R	Beta	124.997	3.75339	3.05807	THR	GLU	3.05807	3.75339
1M1Q	0.97	A	58	HELIX	HELIX	HELIX	-55.7088	-40.6972	-174.602	-43.3473	-67.1454	-13.0117	176.33	-100.125	162.981	-174.183	Alpha-R	Alpha-R	Beta	126.469	2.74962	3.06236	VAL	ALA	3.06236	2.74962
1M2D	1.05	B	55	N/A	N/A	N/A	-54.2209	132.562	175.731	-178.177	-106.228	22.7592	164.909	-80.6938	-177.325	-170.765	Beta	Alpha-R	Beta	144.405	2.77992	3.82376	GLY	MET	3.82376	2.77992
1M2D	1.05	A	22	HELIX	HELIX	N/A	-68.1008	-36.037	178.51	-69.5024	-62.2431	-40.4935	177.169	-155.801	160.871	177.176	Alpha-R	Alpha-R	Beta	101.152	2.98323	2.9139	SER	ALA	2.9139	2.98323
1M2D	1.05	A	9	SHEET	N/A	SHEET	-68.13	122.977	177.883	178.031	-114.885	12.7979	-179.621	-116.052	119.118	175.657	Beta	N/A	Beta	140.002	3.03226	3.88545	VAL	VAL	3.88545	3.03226
1MJ5	0.95	A	52	HELIX	HELIX	HELIX	-98.1561	14.7559	178.018	-68.7012	-54.0333	130.112	179.246	-62.4571	-19.579	179.938	Alpha-R	Beta	Alpha-R	102.505	3.61263	2.78204	HIS	ALA	2.78204	3.61263
1MJ5	0.95	A	257	HELIX	HELIX	HELIX	-56.1164	-35.8934	177.768	-67.1062	-68.5976	-10.7375	172.813	-61.655	-50.0691	178.619	Alpha-R	Alpha-R	Alpha-R	125.736	2.85936	3.08234	PHE	ARG	3.08234	2.85936
1MJ5	0.95	A	61	SHEET	N/A	SHEET	-88.0428	144.89	169.733	-58.8918	-94.5934	124.413	179.044	-141.442	113.672	-178.098	Beta	Beta	Beta	125.496	3.4468	3.52017	ALA	ASP	3.52017	3.4468
1MN8	1	A	39	HELIX	HELIX	HELIX	-60.2618	-46.0815	-166.517	-177.709	-95.2007	-33.1175	-172.527	-64.1509	-46.2801	-178.748	Alpha-R	Alpha-R	Alpha-R	112.445	2.94229	3.46889	PHE	SER	3.46889	2.94229
1MUW	0.86	A	305	HELIX	HELIX	HELIX	-50.9329	-52.3539	-176.055	-75.1488	-69.2273	-44.2681	178.393	-64.3493	-36.1275	173.465	Alpha-R	Alpha-R	Alpha-R	101.436	2.80005	3.08292	GLY	MET	3.08292	2.80005
1N62	1.09	B	333	SHEET	SHEET	SHEET	-139.59	133.059	170.118	-176.888	-119.374	133.187	177.231	-134.14	129.319	-177.049	Beta	Beta	Beta	123.942	3.97906	3.89704	ARG	HIS	3.89704	3.97906
1N62	1.09	B	772	HELIX	HELIX	HELIX	-64.8744	-49.508	178.632	-171.604	-63.7486	-47.1874	-177.436	-65.1543	-28.9446	179.613	Alpha-R	Alpha-R	Alpha-R	98.3985	2.90621	2.91353	PRO	PHE	2.91353	2.90621
1N62	1.09	E	345	N/A	N/A	N/A	-72.9502	114.569	-179.74	-171.365	-61.7332	142.275	179.038	-112.242	25.3719	-176.554	Beta	Beta	N/A	97.1506	2.99493	2.9065	ALA	ALA	2.9065	2.99493
1N62	1.09	B	283	HELIX	HELIX	HELIX	-65.9215	-40.6945	177.07	-69.8752	-59.4447	-40.1709	178.508	-61.2632	-45.6271	-179.705	Alpha-R	Alpha-R	Alpha-R	99.5536	2.92707	2.91518	VAL	ALA	2.91518	2.92707
1N62	1.09	B	23	HELIX	HELIX	HELIX	-79.3181	146.36	170.675	-68.2832	-84.8084	61.7182	-178.39	88.8503	-13.0716	-179.712	Beta	Beta	Alpha-L	172.432	3.21477	3.32892	GLY	LYS	3.32892	3.21477
1N62	1.09	B	498	N/A	SHEET	N/A	-123.82	116.074	176.908	-68.1672	-149.841	149.653	172.767	-143.585	10.0217	176.655	Beta	Beta	N/A	114.719	3.84504	4.11085	ASN	ASP	4.11085	3.84504
1N62	1.09	B	220	N/A	SHEET	N/A	-79.6434	142.239	-172.077	-62.6781	-168.816	158.917	177.689	-77.2164	-177.295	179.144	Beta	Beta	Beta	114.35	3.18688	4.15169	THR	GLN	4.15169	3.18688
1N62	1.09	A	139	SHEET	SHEET	SHEET	-92.4013	-40.4401	-159.272	-58.947	-94.1425	-21.9036	-169.876	-89.5062	-25.3417	-166.911	Alpha-R	Alpha-R	Alpha-R	122.622	3.35462	3.40428	ARG	THR	3.40428	3.35462
1N62	1.09	B	686	N/A	N/A	SHEET	-113.562	34.0605	179.198	57.1486	67.8277	-147.837	-178.273	-124.394	104.486	178.897	N/A	PPII-R	Beta	100.52	3.77523	2.9633	ASP	GLY	2.9633	3.77523
1N62	1.09	A	50	SHEET	SHEET	N/A	-93.6804	10.6898	-171.972	62.1739	-67.7792	132.222	169.396	-66.7365	-18.7915	-177.966	Alpha-R	Beta	Alpha-R	108.887	3.5666	2.91632	ALA	THR	2.91632	3.5666
1N62	1.09	B	359	HELIX	N/A	HELIX	-74.618	-2.9499	167.783	62.7927	-78.2105	-7.67003	166.512	-94.4753	15.2061	-173.553	Alpha-R	Alpha-R	Alpha-R	124.737	3.06313	3.22076	ILE	THR	3.22076	3.06313
1N62	1.09	E	222	SHEET	SHEET	SHEET	-156.89	163.737	162.817	65.9232	-127.379	115.464	177.61	-172.273	161.543	177.892	Beta	Beta	Beta	128.607	4.11263	4.02072	GLN	VAL	4.02072	4.11263
1N62	1.09	A	105	HELIX	HELIX	SHEET	-85.0402	-10.1259	-162.633	69.9105	-67.2845	-42.9116	178.631	-76.4709	-34.2551	178.183	Alpha-R	Alpha-R	Alpha-R	100.479	3.28948	2.89037	TYR	THR	2.89037	3.28948
1N62	1.09	A	62	SHEET	SHEET	HELIX	-79.8095	-3.41923	-175.636	70.2957	-122.989	33.3499	178.648	-70.0646	-8.28971	170.474	Alpha-R	N/A	Alpha-R	151.8	3.28571	3.85508	SER	THR	3.85508	3.28571
1N62	1.09	A	102	SHEET	SHEET	N/A	-72.305	-20.4023	178.818	77.8809	82.6776	-0.0880885	-168.567	-132.757	-77.8672	178.455	Alpha-R	Alpha-L	N/A	136.318	2.9876	3.32911	GLN	GLY	3.32911	2.9876
1N62	1.09	A	42	HELIX	HELIX	HELIX	-161.886	173.931	-179.379	78.0466	-124.051	12.5046	-175.74	-119.787	-5.70755	-173.742	Beta	N/A	N/A	133.425	4.10151	3.86051	GLY	ASP	3.86051	4.10151
1N62	1.09	A	47	N/A	N/A	N/A	-78.424	-28.2523	-177.951	80.1286	74.7865	5.90598	-177.912	-90.6307	-37.0557	-161.593	Alpha-R	Alpha-L	Alpha-R	134.691	3.12219	3.1698	HIS	GLY	3.1698	3.12219
1N62	1.09	B	388	N/A	N/A	N/A	-87.25	-21.3906	-178.203	81.3254	63.3145	23.7468	-173.031	55.9066	38.9754	-178.573	Alpha-R	Alpha-L	Alpha-L	120.38	3.29873	2.9312	ARG	SER	2.9312	3.29873
1N62	1.09	B	664	SHEET	SHEET	SHEET	-139.983	150.422	176.629	83.355	-115.506	129.106	-177.04	-132.786	138.123	173.083	Beta	Beta	Beta	126.027	3.96162	3.72756	PHE	ILE	3.72756	3.96162
1N62	1.09	F	131	HELIX	HELIX	HELIX	-52.4505	-47.3642	-176.821	165.16	-76.3843	-10.267	-176.865	-63.6571	-46.904	175.566	Alpha-R	Alpha-R	Alpha-R	126.714	2.82527	3.18179	GLN	LEU	3.18179	2.82527
1N62	1.09	F	209	SHEET	SHEET	SHEET	-70.2295	127.69	-178.668	174.644	-98.8634	-38.4684	175.352	-132.521	139.455	-178.013	Beta	Alpha-R	Beta	107.859	3.21232	3.58957	LYS	VAL	3.58957	3.21232
1N62	1.09	A	137	SHEET	SHEET	SHEET	-131.8	133.937	174.998	178.535	-89.5062	-25.3417	-166.911	-92.0377	143.816	169.895	Beta	Alpha-R	Beta	119.772	3.9684	3.5151	LEU	ARG	3.5151	3.9684
1NH0	1.03	B	67	N/A	N/A	SHEET	51.6198	38.8719	177.567	-158.359	85.9923	-4.13944	-178.315	-110.121	109.081	-172.42	Alpha-L	Alpha-L	Beta	134.808	2.78818	3.34125	ILE	GLY	3.34125	2.78818
1NH0	1.03	B	95	N/A	SHEET	HELIX	-74.7555	136.853	176.23	-87.843	-135.884	153.81	170.909	73.1057	30.7174	-178.994	Beta	Beta	Alpha-L	113.638	3.10125	4.0611	GLY	THR	4.0611	3.10125
1NKD	1.09	A	40	HELIX	HELIX	HELIX	-66.6654	-31.0752	176.388	-163.537	-60.091	-46.2607	176.488	-61.9827	-44.2276	-176.604	Alpha-R	Alpha-R	Alpha-R	95.4941	2.99964	2.89933	ILE	GLU	2.89933	2.99964
1NKD	1.09	A	54	HELIX	HELIX	HELIX	-61.0463	-46.1075	-179.249	-68.3929	-58.1585	-41.7279	177.783	-63.3308	-44.1198	173.795	Alpha-R	Alpha-R	Alpha-R	100.775	2.95835	2.88849	SER	LEU	2.88849	2.95835
1NKI	0.95	B	123	HELIX	HELIX	HELIX	-67.9886	-31.5719	176.646	-70.8876	-65.7072	-31.3212	177.522	-65.9923	-38.9241	179.666	Alpha-R	Alpha-R	Alpha-R	110.632	3.04718	2.81198	ALA	ARG	2.81198	3.04718
1NKI	0.95	B	48	SHEET	SHEET	SHEET	-115.459	135.046	173.911	171.033	-106.945	125.908	-176.421	-107.129	130.339	170.389	Beta	Beta	Beta	125.584	3.8103	3.74755	LEU	LEU	3.74755	3.8103
1NWZ	0.82	A	69	HELIX	HELIX	HELIX	-66.7197	-16.1903	177.258	81.1871	-93.1958	-3.8241	177.377	-62.4231	-22.3281	177.53	Alpha-R	Alpha-R	Alpha-R	130.238	2.96967	3.55344	PRO	THR	3.55344	2.96967
1OAI	1	A	588	HELIX	HELIX	HELIX	-62.0965	-45.4742	178.54	-176.254	-62.0942	-46.8506	-179.477	-59.0469	-47.8609	-178.916	Alpha-R	Alpha-R	Alpha-R	98.6164	2.87918	2.94065	LYS	LEU	2.94065	2.87918
1P1X	0.99	A	47	SHEET	N/A	SHEET	-134.378	120.776	-169.629	-177.483	-143.879	165.445	173.861	-116.813	158.835	175.583	Beta	Beta	Beta	109.119	4.03763	4.15814	ILE	ILE	4.15814	4.03763
1P1X	0.99	B	1047	N/A	N/A	N/A	-133.389	120.174	-169.822	-175.863	-144.64	166.204	175.383	-118.195	159.046	175.035	Beta	Beta	Beta	108.726	4.04069	4.16222	ILE	ILE	4.16222	4.04069
1P1X	0.99	B	1129	N/A	HELIX	HELIX	-63.4162	-47.005	-177.857	-73.6922	-59.7436	-37.6177	-178.917	-66.3496	-45.0841	-179.535	Alpha-R	Alpha-R	Alpha-R	102.209	2.94897	2.83968	ALA	ALA	2.83968	2.94897
1P1X	0.99	A	129	HELIX	HELIX	HELIX	-64.8145	-46.3716	-175.985	-71.7662	-61.68	-34.8061	-178.714	-63.594	-46.6072	-178.311	Alpha-R	Alpha-R	Alpha-R	103.564	2.94618	2.88222	ALA	ALA	2.88222	2.94618
1P1X	0.99	B	1033	N/A	HELIX	HELIX	-59.864	-42.3081	177.809	-70.5139	-65.7532	-38.1974	177.746	-59.4858	-43.7129	177.668	Alpha-R	Alpha-R	Alpha-R	105.115	2.84677	3.00477	LEU	HIS	3.00477	2.84677
1P1X	0.99	B	1125	N/A	HELIX	HELIX	-68.9827	-37.5887	178.899	-69.6122	-63.778	-42.7942	-177.082	-62.4747	-43.6356	-177.994	Alpha-R	Alpha-R	Alpha-R	104.569	3.01959	2.9286	ALA	LYS	2.9286	3.01959
1P1X	0.99	A	33	HELIX	HELIX	HELIX	-60.619	-42.5363	176.592	-68.725	-63.9499	-37.3115	179.251	-60.866	-42.7224	179.271	Alpha-R	Alpha-R	Alpha-R	105.22	2.9096	2.97448	LEU	HIS	2.97448	2.9096
1P1X	0.99	A	125	HELIX	HELIX	HELIX	-70.5532	-36.1662	176.825	-68.0763	-62.1488	-42.8165	-178.242	-62.0891	-43.3713	-178.495	Alpha-R	Alpha-R	Alpha-R	103.729	3.03977	2.9349	ALA	LYS	2.9349	3.03977
1PJX	0.85	A	62	SHEET	N/A	SHEET	-152.035	136.474	177.217	-177.56	-129.093	80.8152	-164.388	-88.8672	-28.2713	-173.843	Beta	Beta	Alpha-R	143.802	4.13074	3.96608	ILE	LYS	3.96608	4.13074
1PJX	0.85	A	157	SHEET	SHEET	SHEET	-127.9	121.045	175.837	-176.754	-98.2074	113.437	-164.866	-124.506	160.091	163.449	Beta	Beta	Beta	131.131	4.0006	3.60725	TYR	PHE	3.60725	4.0006
1PJX	0.85	A	78	SHEET	N/A	SHEET	-89.3856	139.385	173.592	-169.587	-72.2191	164.968	177.232	-140.201	146.103	172.765	Beta	Beta	Beta	89.7652	3.41294	3.13353	GLN	ASP	3.13353	3.41294
1PJX	0.85	A	119	N/A	N/A	N/A	-113.762	157.081	-178.486	-63.6169	-120.79	-44.1548	178.526	-68.6362	143.534	-169.977	Beta	N/A	Beta	105.549	3.7886	3.90242	GLY	ASN	3.90242	3.7886
1PJX	0.85	A	265	N/A	N/A	SHEET	-105.055	154.153	178.393	-59.9166	-87.1324	41.4375	-178.777	-74.6982	131.48	174.342	Beta	N/A	Beta	170.522	3.72375	3.32091	ARG	PRO	3.32091	3.72375
1PJX	0.85	A	76	SHEET	SHEET	SHEET	-139.989	152.974	163.179	-54.5861	-140.201	146.103	172.765	-156.165	151.504	-172.623	Beta	Beta	Beta	115.951	4.05206	4.17013	GLY	GLN	4.17013	4.05206
1PJX	0.85	A	122	SHEET	SHEET	SHEET	-153.953	159.954	-178.713	59.9937	-146.405	121.899	170.154	-144.615	168.38	-178.401	Beta	Beta	Beta	125.358	4.15782	4.15045	ASP	ALA	4.15045	4.15782
1PJX	0.85	A	306	HELIX	HELIX	HELIX	-66.6456	-12.0067	177.237	65.2166	-94.2127	-5.3659	177.229	-51.8212	-40.9458	-177.498	Alpha-R	Alpha-R	Alpha-R	131.884	3.00259	3.60531	TYR	GLU	3.60531	3.00259
1PMH	1.06	X	29	N/A	SHEET	N/A	-63.0442	-20.2487	173.093	62.8372	-83.5162	111.089	-174.282	59.6022	-106.259	178.482	Alpha-R	Beta	PPII-R	132.439	3.02825	3.28293	LYS	ILE	3.28293	3.02825
1Q6Z	1	A	220	HELIX	HELIX	HELIX	-65.7661	-34.9641	173.188	-67.9854	-59.9255	-46.8875	178.988	-63.7811	-39.4162	176.468	Alpha-R	Alpha-R	Alpha-R	97.5872	3.05054	2.93914	ASP	VAL	2.93914	3.05054
1Q6Z	1	A	248	N/A	SHEET	N/A	-71.4552	-18.0059	-170.957	-61.9111	-69.6874	134.625	-179.136	-58.5099	-32.3999	174.671	Alpha-R	Beta	Alpha-R	106.24	3.24002	3.01231	PRO	PHE	3.01231	3.24002
1Q6Z	1	A	49	HELIX	HELIX	HELIX	-70.712	-44.8541	176.235	-53.3473	-51.5903	-54.3733	-175.641	-59.8982	-36.7267	178.638	Alpha-R	Alpha-R	Alpha-R	96.5131	3.14079	2.79308	ALA	VAL	2.79308	3.14079
1Q6Z	1	A	398	N/A	N/A	SHEET	-48.3299	113.975	-167.398	49.7108	-72.3373	-23.3756	173.653	-140.963	137.305	-178.153	Beta	Alpha-R	Beta	119.744	2.78574	2.99726	PHE	ALA	2.99726	2.78574
1Q6Z	1	A	300	N/A	HELIX	SHEET	-84.0435	0.141685	-164.426	63.087	-127.424	111.752	174.679	-135.52	147.35	174.087	Alpha-R	Beta	Beta	135.635	3.37533	3.88798	THR	ASP	3.88798	3.37533
1Q6Z	1	A	240	N/A	N/A	N/A	-110.302	116.488	-174.087	178.484	-96.2109	5.0914	-170.403	-142.889	170.621	173.829	Beta	Alpha-R	Beta	138.195	3.72519	3.56578	ARG	PRO	3.56578	3.72519
1QOW	1.06	C	12	N/A	N/A	N/A	-61.7196	129.984	179.739	-177.595	91.3788	-3.48561	-177.449	-109.897	121.704	-179.197	Beta	Alpha-L	Beta	136.291	2.87362	3.49099	VAL	DBB	3.49099	2.87362
1QOW	1.06	B	18	N/A	N/A	N/A	-112.081	-125.88	178.394	-61.563	-71.5565	-41.5647	170.394	-78.4414	-12.5868	176.816	Beta	Alpha-R	Alpha-R	99.9879	3.81395	3.13726	GLU	ILE	3.13726	3.81395
1QV0	1.1	A	51	HELIX	HELIX	HELIX	-66.2518	-31.5977	176.61	-76.8454	-63.9296	-47.1322	178.781	-64.5176	-55.7289	-176.017	Alpha-R	Alpha-R	Alpha-R	95.4804	2.89559	2.97685	ILE	ALA	2.97685	2.89559
1QV0	1.1	A	67	HELIX	HELIX	HELIX	-68.733	-38.269	177.014	-68.7405	-65.3933	-43.9218	177.233	-58.1275	-41.3673	-178.588	Alpha-R	Alpha-R	Alpha-R	100.271	3.03363	3.03884	VAL	VAL	3.03884	3.03363
1QV0	1.1	A	158	HELIX	N/A	HELIX	-77.6022	157.367	166.106	-68.5065	-79.2398	115.243	-174.801	-66.1273	-44.4391	-175.391	Beta	Beta	Alpha-R	131.828	3.22457	3.32674	HIS	ASP	3.32674	3.22457
1QV0	1.1	A	151	HELIX	HELIX	HELIX	-71.0835	-36.4625	168.157	-66.1734	-58.6438	-38.3476	177.184	-69.5204	-31.957	175.079	Alpha-R	Alpha-R	Alpha-R	103.445	3.07692	2.93914	ASP	GLU	2.93914	3.07692
1QV0	1.1	A	75	HELIX	N/A	HELIX	-105.998	25.5859	166.507	63.7928	94.8758	-1.98404	-177.633	-66.2611	-20.6407	173.861	Alpha-R	Alpha-L	Alpha-R	131.361	3.63142	3.42272	GLY	GLY	3.42272	3.63142
1QXY	1.04	A	19	HELIX	HELIX	HELIX	-64.2573	-38.9414	175.358	-70.3852	-62.0249	-42.801	179.248	-60.1266	-45.2687	178.863	Alpha-R	Alpha-R	Alpha-R	101.422	2.94449	2.9782	ILE	ALA	2.9782	2.94449
1QXY	1.04	A	123	HELIX	HELIX	HELIX	-61.9604	-46.8508	179.679	-64.2741	-59.8951	-41.0779	-177.55	-63.4382	-35.8988	174.236	Alpha-R	Alpha-R	Alpha-R	101.626	2.96454	2.9279	VAL	ASP	2.9279	2.96454
1QXY	1.04	A	67	N/A	N/A	N/A	-105.304	126.505	-178.274	-58.1957	-129.786	116.3	-168.385	-131.238	170.453	173.662	Beta	Beta	Beta	129.692	3.67566	3.91497	THR	ILE	3.91497	3.67566
1R6J	0.73	A	239	SHEET	SHEET	SHEET	-107.811	-32.6002	-173.349	-59.854	-153.509	140.951	177.287	-84.0368	117.681	-175.199	Alpha-R	Beta	Beta	116.157	3.68647	4.15386	ILE	GLU	4.15386	3.68647
1RG8	1.1	A	16	SHEET	N/A	SHEET	-99.3849	119.881	177.024	-174.425	-55.8189	-29.6857	-172.11	-92.6439	124.49	179.197	Beta	Alpha-R	Beta	116.405	3.58151	3.0543	TYR	SER	3.0543	3.58151
1RG8	1.1	B	83	HELIX	N/A	HELIX	-107.436	-2.0167	177.552	-59.8936	-87.8897	130.329	178.332	-77.9693	-5.47714	-172.732	Alpha-R	Beta	Alpha-R	121.938	3.71808	3.41037	GLU	LEU	3.41037	3.71808
1RG8	1.1	B	117	N/A	N/A	N/A	-82.6883	149.421	173.406	66.31	-72.8342	146.465	165.43	-78.9937	157.868	175.886	Beta	Beta	Beta	101.309	3.24374	3.30333	SER	LYS	3.30333	3.24374
1RW1	1.02	A	47	HELIX	HELIX	HELIX	-66.9365	-35.5032	177.094	-72.4771	-60.1381	-37.8537	-174.726	-65.3809	-42.6236	179.293	Alpha-R	Alpha-R	Alpha-R	106.875	3.00125	2.90288	TRP	ALA	2.90288	3.00125
1RW1	1.02	A	11	HELIX	HELIX	N/A	-149.586	124.092	-178.707	169.569	-62.5487	-34.6354	178.006	-90.8159	72.1507	-177.858	Beta	Alpha-R	Beta	107.75	4.1336	2.92069	ALA	ASP	2.92069	4.1336
1SBY	1.1	B	217	HELIX	HELIX	HELIX	-60.6082	-44.2064	179.112	-172.312	-63.5291	-38.9838	174.96	-54.4098	-50.4074	-179.151	Alpha-R	Alpha-R	Alpha-R	105.552	2.89571	2.95758	GLN	GLY	2.95758	2.89571
1SBY	1.1	B	137	N/A	HELIX	SHEET	-101.058	-115.424	-175.365	-61.0623	173.029	145.911	169.612	-81.2744	106.265	-179.473	N/A	N/A	Beta	107.778	3.59434	4.25525	ILE	SER	4.25525	3.59434
1TJX	1.04	A	277	SHEET	SHEET	SHEET	-116.642	127.945	176.136	-169.993	-146.104	156.818	172.549	-130.272	141.081	177.475	Beta	Beta	Beta	113.712	3.81665	4.12232	ILE	PHE	4.12232	3.81665
1TQG	0.98	A	63	HELIX	HELIX	HELIX	-59.9028	-33.768	176.605	-69.9007	-67.8504	-46.1666	176.396	-63.2871	-48.2856	176.481	Alpha-R	Alpha-R	Alpha-R	99.7648	2.87797	3.05355	LEU	HIS	3.05355	2.87797
1U2H	0.96	A	93	SHEET	SHEET	SHEET	-105.681	119.647	178.475	-176.483	-103.088	133.927	176.426	-118.077	134.304	168.841	Beta	Beta	Beta	119.417	3.74959	3.71008	THR	LYS	3.71008	3.74959
1U2H	0.96	A	76	SHEET	SHEET	SHEET	-130.771	135.54	-174.597	-60.0197	-132.879	147.031	164.248	-73.2592	131.057	176.624	Beta	Beta	Beta	117.77	3.99508	3.97461	LEU	ARG	3.97461	3.99508
1U2H	0.96	A	104	SHEET	SHEET	SHEET	-143.816	165.227	-170.887	63.9956	-144.996	153.005	168.168	-146.782	160.352	170.459	Beta	Beta	Beta	115.99	4.12604	4.08448	GLN	GLU	4.08448	4.12604
1UNQ	0.98	A	77	SHEET	SHEET	SHEET	-145.254	170.588	-179.889	52.3219	-97.8906	125.552	174.346	-109.821	118.136	-173.42	Beta	Beta	Beta	126.28	4.08972	3.51216	ARG	LEU	3.51216	4.08972
1UNQ	0.98	A	60	N/A	SHEET	N/A	-72.3899	161.427	166.981	76.7606	-107.849	143.546	-177.174	58.7786	23.9935	-178.205	Beta	Beta	Alpha-L	113.843	3.00641	3.83924	GLN	GLN	3.83924	3.00641
1US0	0.66	A	92	HELIX	HELIX	HELIX	-63.5779	-44.2154	-179.103	-176.705	-64.7755	-34.5364	175.511	-63.5194	-44.4815	178.344	Alpha-R	Alpha-R	Alpha-R	107.634	2.9322	2.98804	ALA	GLN	2.98804	2.9322
1US0	0.66	A	186	N/A	N/A	SHEET	-161.749	130.294	-177.713	-170.883	-168.696	176.745	-176.063	-67.1603	135.297	178.383	Beta	Beta	Beta	106.61	4.14101	4.28864	GLU	HIS	4.28864	4.14101
1US0	0.66	A	298	N/A	N/A	N/A	-127.724	96.592	-174.586	-164.008	-152.09	164.505	-177.387	-62.3244	-31.0059	-152.835	Beta	Beta	Alpha-R	105.181	3.5612	4.23416	VAL	ALA	4.23416	3.5612
1US0	0.66	A	199	HELIX	HELIX	HELIX	-78.368	-41.6257	179.587	-67.8362	-65.1075	-84.0111	152.249	-59.6365	-37.25	-174.257	Alpha-R	N/A	Alpha-R	90.9062	2.81991	2.83852	TYR	GLN	2.83852	2.81991
1US0	0.66	A	44	N/A	HELIX	SHEET	-127.261	170.676	166.76	-67.375	-163.335	146.832	175.227	-99.8241	122.863	-171.586	Beta	Beta	Beta	117.084	3.97486	4.19698	ASP	ALA	4.19698	3.97486
1US0	0.66	A	303	HELIX	HELIX	HELIX	-103.075	-1.06201	-171.421	-66.7359	-68.2333	105.885	-69.8327	-61.5178	-19.2285	-176.741	Alpha-R	Beta	Alpha-R	118.639	3.65533	3.09083	SER	THR	3.09083	3.65533
1US0	0.66	A	80	HELIX	HELIX	HELIX	-62.6624	-27.4702	179.653	-60.1539	-82.5655	8.89965	-179.526	-77.1469	161.476	-170.254	Alpha-R	Alpha-R	Beta	139.592	3.03894	3.37584	TRP	THR	3.37584	3.03894
1UWC	1.08	A	235	HELIX	HELIX	HELIX	-59.2706	-43.7766	-173.055	177.875	-64.4983	-28.7718	177.401	53.6804	-136.679	-174.473	Alpha-R	Alpha-R	PPII-R	110.389	2.86165	2.94452	CYS	GLU	2.94452	2.86165
1UZ3	1.1	A	18	HELIX	HELIX	HELIX	-62.8187	-35.1056	176.685	-70.7352	-60.8413	-41.6067	179.742	-71.1086	-39.6402	177.328	Alpha-R	Alpha-R	Alpha-R	101.96	2.9176	2.93032	GLU	LYS	2.93032	2.9176
1VYR	0.9	A	222	HELIX	HELIX	HELIX	-62.5475	-40.2878	179.356	-70.8794	-66.712	-41.5588	-177.868	-76.5414	-32.3554	173.219	Alpha-R	Alpha-R	Alpha-R	102.448	3.00053	3.07838	VAL	ASN	3.07838	3.00053
1W23	1.08	A	346	HELIX	HELIX	HELIX	-67.2582	-42.1856	174.001	-63.8164	-58.8029	-44.3732	-179.973	-68.5053	-38.5006	178.373	Alpha-R	Alpha-R	Alpha-R	100.158	3.08235	2.94087	ALA	ILE	2.94087	3.08235
1W23	1.08	B	333	SHEET	SHEET	N/A	-127.081	152.368	177.367	-52.046	-144.658	115.269	173.494	58.4093	-144.229	-171.624	Beta	Beta	PPII-R	128.003	3.96139	4.09655	GLY	ARG	4.09655	3.96139
1W66	1.08	A	117	HELIX	HELIX	HELIX	-62.1204	-46.4265	179.833	-70.6086	-57.9353	-40.1855	-177.76	-57.8189	-44.9816	177.537	Alpha-R	Alpha-R	Alpha-R	104.255	2.93196	2.91855	VAL	ALA	2.91855	2.93196
1W66	1.08	A	208	HELIX	HELIX	HELIX	-63.0521	-39.3276	179.884	-70.2876	-66.3855	-43.2125	-175.903	-61.4131	-47.5859	-176.937	Alpha-R	Alpha-R	Alpha-R	101.278	2.84884	3.01636	VAL	ALA	3.01636	2.84884
1W66	1.08	A	176	HELIX	HELIX	HELIX	53.2481	35.8775	176.57	-64.6821	70.7861	11.2301	-174.288	-71.028	123.811	179.34	Alpha-L	Alpha-L	Beta	131.473	2.82729	3.17683	PRO	GLY	3.17683	2.82729
1W66	1.08	A	163	N/A	N/A	SHEET	-104.685	-73.0606	175.943	-63.3312	-132.086	23.0936	174.828	-80.5556	115.892	-173.359	Alpha-R	N/A	Beta	139.489	3.65442	4.0399	ASN	ASP	4.0399	3.65442
1W66	1.08	A	165	N/A	N/A	N/A	-65.5097	148.62	167.748	51.9081	-66.2942	126.202	-176.658	-132.086	23.0936	174.828	Beta	Beta	N/A	113.886	2.99185	3.07175	ASP	ASP	3.07175	2.99185
1XG0	0.97	C	109	HELIX	N/A	HELIX	-112.13	-45.1728	-168.198	-168.437	-93.7507	-35.5346	-174.942	-99.2689	-20.7986	-179.332	N/A	Alpha-R	Alpha-R	107.443	3.75566	3.39889	ARG	LEU	3.39889	3.75566
1XG0	0.97	C	50	HELIX	HELIX	HELIX	-69.147	-36.7523	179.848	-162.744	-60.0188	-50.7046	-177.43	-59.761	-46.5236	-178.507	Alpha-R	Alpha-R	Alpha-R	96.8757	3.00929	2.91028	SER	ILE	2.91028	3.00929
1XG0	0.97	C	73	N/A	N/A	N/A	-98.1756	7.31606	179.538	-72.2462	-69.0233	140.384	-173.83	-76.0591	-11.5628	172.869	Alpha-R	Beta	Alpha-R	104.613	3.64953	3.03762	MEN	TYR	3.03762	3.64953
1XG0	0.97	C	137	HELIX	HELIX	HELIX	-58.9851	-49.6225	-175.281	-67.3009	-61.409	-43.0181	179.596	-58.9573	-42.2071	178.645	Alpha-R	Alpha-R	Alpha-R	103.652	2.8647	2.94525	ALA	ALA	2.94525	2.8647
1XG0	0.97	D	158	HELIX	HELIX	N/A	-106.184	23.9065	179.389	-61.9572	-61.5115	-32.6482	-179.737	-99.3422	108.583	177.847	Alpha-R	Alpha-R	Beta	108.982	3.74745	2.91289	ASP	SER	2.91289	3.74745
1XG0	0.97	D	61	HELIX	HELIX	HELIX	-66.4411	-28.4498	175.474	72.3987	-74.3031	-29.0395	-179.861	-71.2342	-43.2262	-178.447	Alpha-R	Alpha-R	Alpha-R	110.329	2.85278	3.174	ILE	GLU	3.174	2.85278
1XG0	0.97	A	19	SHEET	SHEET	SHEET	-70.9851	131.892	-177.497	174.092	-77.3281	-9.25804	172.387	85.1408	-3.04302	-177.625	Beta	Alpha-R	Alpha-L	126.339	3.06805	3.20232	GLY	SER	3.20232	3.06805
1XG0	0.97	D	82	HELIX	HELIX	HELIX	-67.4922	-48.1443	174.966	174.961	-58.313	-41.8577	178.362	-63.0688	-39.1283	-179.59	Alpha-R	Alpha-R	Alpha-R	104.171	3.04233	2.91175	ALA	LEU	2.91175	3.04233
1XMK	0.97	A	304	HELIX	HELIX	HELIX	-57.1607	-49.1486	179.558	173.627	-56.4145	-45.5639	-178.896	-65.0669	-47.5589	178.638	Alpha-R	Alpha-R	Alpha-R	87.5204	2.88279	2.91646	ILE	ASP	2.91646	2.88279
1XY1	1.04	A	6	N/A	N/A	N/A	-145.069	98.3244	-176.198	-177.966	-78.1164	-7.72705	179.204	-150.422	74.5056	-176.922	Beta	Alpha-R	Beta	128.223	4.0771	3.10178	ASN	PRO	3.10178	4.0771
1Y55	1	X	4	N/A	N/A	N/A	-72.3247	117.218	168.345	-118.576	-111.516	157.387	-172.561	145.034	122.305	174.482	Beta	Beta	N/A	114.691	3.24376	3.8598	LYS	SER	3.8598	3.24376
1Y55	1	X	81	SHEET	SHEET	SHEET	-94.8654	119.82	176.641	-25.6951	-105.295	142.317	172.144	-139.221	143.633	172.719	Beta	Beta	Beta	116.41	3.56585	3.71374	GLN	PHE	3.71374	3.56585
1YFQ	1.1	A	308	SHEET	SHEET	SHEET	-104.3	130.998	178.845	-179.381	-128.101	149.638	175.482	-115.417	121.889	175.166	Beta	Beta	Beta	117.577	3.70133	3.98547	LEU	LEU	3.98547	3.70133
1YFQ	1.1	A	108	SHEET	SHEET	SHEET	-118.948	156.336	175.935	-66.7985	-59.5278	141.742	174.247	-128.901	123.168	-176.28	Beta	Beta	Beta	98.4059	3.86481	2.96796	ILE	LYS	2.96796	3.86481
1YFQ	1.1	A	180	N/A	N/A	N/A	-122.834	132.614	-175.206	-66.4533	-59.4929	-30.8931	-175.504	-58.1788	138.774	172.013	Beta	Alpha-R	Beta	111.03	4.00045	2.81885	LEU	GLU	2.81885	4.00045
1YFQ	1.1	A	211	SHEET	SHEET	SHEET	-123.839	144.812	170.684	-66.2722	-108.908	155.578	-173.856	-120.839	138.491	173.614	Beta	Beta	Beta	108.626	3.9757	3.74924	ALA	SER	3.74924	3.9757
1YFQ	1.1	A	302	SHEET	N/A	SHEET	-119.293	124.102	176.472	-64.9052	-119.996	-173.888	-179.506	-143.87	136.271	-175.936	Beta	Beta	Beta	97.0314	3.89291	3.88226	ALA	SER	3.88226	3.89291
1YFQ	1.1	A	240	N/A	N/A	SHEET	-115.345	-7.32976	177.337	-59.5296	-115.099	121.215	172.602	-82.7671	140.617	174.24	N/A	Beta	Beta	129.136	3.87051	3.8223	ARG	HIS	3.8223	3.87051
1YFQ	1.1	A	61	SHEET	SHEET	SHEET	-164.793	166.573	177.563	60.2489	-153.366	165.232	168.696	-103.276	-23.7713	-172.154	Beta	Beta	Alpha-R	114.192	4.15437	4.20552	LEU	CYS	4.20552	4.15437
1YFQ	1.1	A	105	SHEET	SHEET	SHEET	-81.0889	-27.2434	-175.68	64.549	-157.641	150.111	169.65	-83.1204	106.405	-173.404	Alpha-R	Beta	Beta	115.954	3.28399	4.14371	ILE	ARG	4.14371	3.28399
1YFQ	1.1	A	62	SHEET	SHEET	SHEET	-153.366	165.232	168.696	66.6921	-166.144	-175.558	-172.317	-164.793	166.573	177.563	Beta	Beta	Beta	106.825	4.20552	4.25716	CYS	ASN	4.25716	4.20552
1YFQ	1.1	A	277	SHEET	SHEET	SHEET	-120.549	126.84	-173.431	176.193	-127.033	138.929	169.854	-118.71	155.152	179.233	Beta	Beta	Beta	120.448	3.91636	3.99873	SER	TRP	3.99873	3.91636
1Z2U	1.1	A	111	HELIX	HELIX	HELIX	-67.9739	-35.7172	-170.463	-162.333	-141.576	83.6122	178.255	-63.7335	-39.0383	178.089	Alpha-R	Beta	Alpha-R	142.327	3.06654	4.11035	LEU	ASP	4.11035	3.06654
1Z2U	1.1	A	107	HELIX	HELIX	HELIX	-56.3061	-44.4295	177.595	-155.425	-61.9383	-35.9104	177.359	-64.1904	-41.4599	173.912	Alpha-R	Alpha-R	Alpha-R	107.065	2.86115	2.9682	ILE	SER	2.9682	2.86115
1Z2U	1.1	A	85	N/A	HELIX	N/A	-102.888	106.612	-177.429	-88.9617	-147.117	126.013	-172.107	-120.741	129.63	171.596	Beta	Beta	Beta	121.483	3.69438	4.12987	ILE	LEU	4.12987	3.69438
1Z2U	1.1	A	21	SHEET	SHEET	N/A	-149.808	165.653	178.589	-12.3258	-148.574	159.253	178.063	-90.427	-7.51988	179.6	Beta	Beta	Alpha-R	111.911	4.15735	4.16983	GLN	SER	4.16983	4.15735
1ZK4	1	A	173	HELIX	HELIX	HELIX	-62.3121	-40.7616	178.571	-69.7391	-64.9403	-50.2266	-176.581	-61.6007	-43.5988	178.608	Alpha-R	Alpha-R	Alpha-R	97.2038	2.96136	3.03124	ASP	ALA	3.03124	2.96136
1ZK4	1	A	226	HELIX	HELIX	HELIX	-67.8238	-35.9745	174.869	-69.3436	-58.769	-47.2455	178.302	-67.5926	-32.6567	176.307	Alpha-R	Alpha-R	Alpha-R	96.1058	3.00888	2.86955	ILE	VAL	2.86955	3.00888
1ZL0	1.1	B	246	SHEET	SHEET	SHEET	-124.447	109.451	-177.554	-87.2973	-82.6168	128.976	160.524	-115.367	131.201	-179.514	Beta	Beta	Beta	118.527	3.94003	3.29732	ILE	LEU	3.29732	3.94003
1ZL0	1.1	A	84	SHEET	N/A	SHEET	-71.9809	136.394	-172.738	-65.6518	-76.3261	-36.0732	-175.669	-105.752	113.588	-179.879	Beta	Alpha-R	Beta	107.759	3.09088	3.15844	TRP	LEU	3.15844	3.09088
1ZL0	1.1	B	253	N/A	N/A	N/A	-120.361	61.0966	-177.263	-63.6593	-58.7463	142.564	178.727	50.7316	41.1271	175.136	Beta	Beta	Alpha-L	98.1576	3.92655	2.83874	ASP	PRO	2.83874	3.92655
1ZL0	1.1	A	91	HELIX	HELIX	HELIX	-71.8295	-23.4803	174.972	36.1299	-61.0795	-25.1469	177.302	135.913	-9.01182	-172.891	Alpha-R	Alpha-R	N/A	113.673	3.00251	2.93362	GLY	GLY	2.93362	3.00251
1ZL0	1.1	A	198	HELIX	N/A	HELIX	-77.1596	-2.97719	171.858	92.6149	-100.227	-8.30031	-178.404	-57.8267	-34.3919	-177.582	Alpha-R	Alpha-R	Alpha-R	128.564	3.14925	3.53549	ALA	MET	3.53549	3.14925
2A28	1.07	B	41	SHEET	N/A	SHEET	-144.082	109.018	177.561	-177.66	51.6613	38.4853	171.997	-131.959	144.391	176.527	Beta	Alpha-L	Beta	109.244	4.09977	2.8546	GLU	ASP	2.8546	4.09977
2A28	1.07	B	53	SHEET	SHEET	HELIX	-119.833	166.082	177.405	-63.6704	-73.6646	-23.5907	130.661	-91.5235	2.97447	178.639	Beta	Alpha-R	Alpha-R	80.489	3.94458	2.79442	TYR	LYS	2.79442	3.94458
2ABS	1.1	A	139	SHEET	SHEET	SHEET	-133.477	106.916	-167.778	-175.592	-110.851	137.073	168.592	-119.721	133.624	176.847	Beta	Beta	Beta	119.028	4.01499	3.74813	LEU	THR	3.74813	4.01499
2ABS	1.1	A	340	HELIX	HELIX	HELIX	-65.2596	-44.2237	174.5	-173.218	-54.4415	-44.9991	178.516	-61.8021	-38.6363	175.382	Alpha-R	Alpha-R	Alpha-R	99.868	2.96106	2.88318	MET	GLY	2.88318	2.96106
2ABS	1.1	A	256	HELIX	HELIX	HELIX	-60.5312	-43.6764	176.712	-73.1965	-60.956	-45.963	176.458	-66.8762	-45.5094	178.774	Alpha-R	Alpha-R	Alpha-R	99.8015	2.90046	2.99096	VAL	THR	2.99096	2.90046
2ABS	1.1	A	344	HELIX	HELIX	HELIX	-68.302	-44.6452	176.961	-70.5219	-62.1332	-56.132	169.526	-65.8877	-40.7626	-178.541	Alpha-R	Alpha-R	Alpha-R	102.492	2.9888	2.96264	ALA	ALA	2.96264	2.9888
2ABS	1.1	A	107	HELIX	HELIX	HELIX	-68.7027	-39.3406	177.731	-68.9989	-62.5023	-100.975	147.472	-66.9883	-38.0544	176.736	Alpha-R	N/A	Alpha-R	102.675	3.05726	2.95419	LEU	ASP	2.95419	3.05726
2ABS	1.1	A	337	HELIX	HELIX	HELIX	-64.7644	-42.7058	177.909	-68.9753	-62.552	-42.9647	178.166	-65.7912	-35.4104	178.308	Alpha-R	Alpha-R	Alpha-R	99.9629	2.95985	2.96793	GLN	ILE	2.96793	2.95985
2ABS	1.1	A	202	HELIX	HELIX	HELIX	-65.4077	-42.2729	-177.556	-55.8391	-64.6032	-41.2681	-171.376	-60.9628	-33.4446	-176.031	Alpha-R	Alpha-R	Alpha-R	103.968	2.86335	2.94896	PHE	VAL	2.94896	2.86335
2ABS	1.1	A	145	HELIX	HELIX	HELIX	-67.0395	-20.3335	173.89	68.2246	-70.7849	-5.8862	-177.998	-59.4174	-19.7988	-171.889	Alpha-R	Alpha-R	Alpha-R	131.032	2.78619	3.09893	ALA	GLY	3.09893	2.78619
2ABS	1.1	A	127	SHEET	SHEET	SHEET	-129.916	121.034	170.931	179.837	-80.3405	116.664	-178.753	-146.611	142.673	179.873	Beta	Beta	Beta	125.138	3.98511	3.3189	VAL	ALA	3.3189	3.98511
2ANV	1.04	A	88	HELIX	HELIX	HELIX	-58.6041	-41.6056	-179.026	-73.9219	-66.1321	-43.9253	177.938	-58.6025	-41.472	179.058	Alpha-R	Alpha-R	Alpha-R	99.1968	2.87027	3.02252	MET	SER	3.02252	2.87027
2AU7	1.05	A	53	N/A	SHEET	N/A	-139.548	172.038	167.05	-24.0125	-59.3348	146.772	-173.238	-73.6059	-17.3922	176.854	Beta	Beta	Alpha-R	96.761	4.08579	2.8358	PRO	ASN	2.8358	4.08579
2AU7	1.05	A	87	SHEET	SHEET	SHEET	-142.887	173.115	-178.816	53.8267	-132.118	124.757	-178.155	-75.7753	129.267	-172.484	Beta	Beta	Beta	125.025	4.1164	4.0456	ARG	ARG	4.0456	4.1164
2B3H	1.1	A	183	HELIX	HELIX	HELIX	-62.8833	-51.569	-178.94	-174.906	-58.8965	-38.7776	177.749	-65.9882	-37.1147	174.931	Alpha-R	Alpha-R	Alpha-R	103.428	2.98967	2.90979	ALA	ILE	2.90979	2.98967
2B3H	1.1	A	152	HELIX	HELIX	HELIX	-68.9769	-36.1783	176.502	-72.846	-65.5174	-41.4029	177.613	-64.4416	-34.5043	-179.879	Alpha-R	Alpha-R	Alpha-R	100.015	3.0406	3.00703	VAL	ARG	3.00703	3.0406
2B3H	1.1	A	264	HELIX	HELIX	HELIX	-56.7504	-48.4778	178.387	-70.2345	-55.4473	-50.7749	-172.294	-60.9091	-39.9423	175.35	Alpha-R	Alpha-R	Alpha-R	99.0271	2.90426	2.86132	GLU	LEU	2.86132	2.90426
2B3H	1.1	A	188	N/A	SHEET	N/A	-121.937	151.661	171.534	-67.3314	-89.6351	138.403	175.06	59.6866	37.1448	179.079	Beta	Beta	Alpha-L	115.344	3.90903	3.45385	ASN	TYR	3.45385	3.90903
2B3H	1.1	A	301	N/A	SHEET	N/A	-133.735	163.865	165.205	-58.5657	-68.8261	167.807	-169.818	-129.357	139.447	-170.528	Beta	Beta	Beta	84.0456	4.12177	3.15149	TYR	GLY	3.15149	4.12177
2B3H	1.1	A	340	SHEET	N/A	SHEET	-126.612	147.018	176.231	-55.463	-67.1072	-35.4314	-179.734	-121.181	142.613	-171.333	Beta	Alpha-R	Beta	110.05	3.92801	3.1613	ILE	GLU	3.1613	3.92801
2B3H	1.1	A	203	SHEET	SHEET	N/A	-110.015	135.644	178.747	-53.3544	-122.687	115.794	-170.09	-159.338	167.542	175.785	Beta	Beta	Beta	131.3	3.76448	3.91275	CYS	THR	3.91275	3.76448
2B3H	1.1	A	211	SHEET	N/A	SHEET	-168.42	166.638	171.196	65.1646	66.8379	22.8302	173.289	-69.9536	-49.0844	-177.84	Beta	Alpha-L	Alpha-R	123.321	4.23794	3.11722	ILE	HIS	3.11722	4.23794
2B3H	1.1	A	202	N/A	SHEET	N/A	-159.338	167.542	175.785	67.0412	-110.015	135.644	178.747	-99.0779	-3.4118	176.926	Beta	Beta	Alpha-R	124.086	4.26771	3.76448	SER	CYS	3.76448	4.26771
2B3H	1.1	A	377	SHEET	SHEET	N/A	-150.019	148.917	172.544	74.0973	-105.84	124.297	-179.498	-177.614	-126.124	176.83	Beta	Beta	Beta	129.002	4.11209	3.79423	GLY	GLU	3.79423	4.11209
2BF6	0.97	A	588	N/A	N/A	N/A	-150.317	154.493	172.23	-171.994	-58.6185	151.356	178.198	78.4169	65.1312	-175.733	Beta	Beta	Alpha-L	90.8683	4.17792	2.92606	TYR	GLN	2.92606	4.17792
2BF6	0.97	A	657	SHEET	SHEET	SHEET	-150.423	131.951	178.895	-163.264	-96.6253	156.482	161.842	-155.394	163.667	171.968	Beta	Beta	Beta	106.687	4.13162	3.64022	SER	LEU	3.64022	4.13162
2BF6	0.97	A	372	SHEET	SHEET	SHEET	-87.3893	147.004	168.541	-69.0451	-126.191	155.421	-177.015	-61.4529	134.295	174.861	Beta	Beta	Beta	113.314	3.41056	3.97934	LEU	LEU	3.97934	3.41056
2BF6	0.97	A	540	SHEET	SHEET	SHEET	-160.787	163.319	175.413	54.1829	-142.289	149.361	-170.332	-56.6488	151.542	-172.525	Beta	Beta	Beta	111.738	4.14508	4.16359	GLU	GLN	4.16359	4.14508
2BHU	1.1	A	127	HELIX	N/A	HELIX	-86.6794	133.078	158.305	-72.8869	-122.295	108.377	-175.044	-103.712	4.08807	-178.564	Beta	Beta	Alpha-R	131.329	3.337	3.98507	ASP	VAL	3.98507	3.337
2BHU	1.1	A	395	SHEET	N/A	SHEET	-154.358	165.825	164.807	76.1345	-111.301	-10.1125	176.249	-102.463	152.103	170.218	Beta	N/A	Beta	125.186	4.1749	3.91492	TYR	ILE	3.91492	4.1749
2BT9	0.94	C	75	SHEET	SHEET	SHEET	-118.453	127.207	167.754	-53.3989	-107.198	122.555	177.576	-120.686	135.281	-168.395	Beta	Beta	Beta	128.59	3.82489	3.78928	TRP	TRP	3.78928	3.82489
2BT9	0.94	A	30	SHEET	SHEET	SHEET	-135.096	141.492	174.376	-50.0416	-129.343	127.608	174.981	-119.355	146.463	-164.439	Beta	Beta	Beta	124.264	3.99671	4.02804	ARG	TRP	4.02804	3.99671
2C2U	1.1	A	171	HELIX	HELIX	HELIX	-66.3987	-41.6117	176.747	-70.7389	-61.4526	-39.1512	179.034	-64.6664	-40.3387	178.642	Alpha-R	Alpha-R	Alpha-R	98.3312	3.0083	2.88233	ALA	ASP	2.88233	3.0083
2CAL	1.1	A	1138	N/A	N/A	N/A	-90.7351	135.976	-178.415	-179.722	-96.7496	-0.7304	175.587	-137.817	143.978	167.879	Beta	Alpha-R	Beta	130.83	3.53059	3.58047	VAL	GLN	3.58047	3.53059
2CAR	1.09	A	57	HELIX	HELIX	HELIX	-68.8643	-38.6777	174.263	-174.652	-59.1658	-40.9188	-179.602	-64.0715	-41.2975	-177.975	Alpha-R	Alpha-R	Alpha-R	105.701	3.02432	2.96063	LYS	GLN	2.96063	3.02432
2CAR	1.09	A	74	SHEET	SHEET	SHEET	-113.639	149.355	171.374	-64.9506	-125.296	115.18	-163.979	-129.081	127.149	-173.254	Beta	Beta	Beta	130.402	4.07515	3.90034	THR	LEU	3.90034	4.07515
2CAR	1.09	A	154	N/A	SHEET	HELIX	-96.4274	-12.1979	-169.4	-60.7864	-108.097	115.86	177.543	-56.5973	-23.3386	-173.246	Alpha-R	Beta	Alpha-R	130.997	3.68626	3.67557	PRO	PHE	3.67557	3.68626
2CAR	1.09	B	76	SHEET	SHEET	SHEET	-118.291	110.785	179.98	-59.4275	-89.265	124.993	-176.229	-123.779	120.787	-162.602	Beta	Beta	Beta	125.698	3.7743	3.34311	LEU	PHE	3.34311	3.7743
2CAR	1.09	A	33	N/A	SHEET	N/A	-130.167	166.29	178.305	-48.0132	-104.372	112.022	175.718	-97.1312	26.4401	179.771	Beta	Beta	Alpha-R	137.76	4.10303	3.73716	PRO	THR	3.73716	4.10303
2CAR	1.09	A	146	N/A	N/A	N/A	-68.7371	127.813	-171.41	165.769	-76.0632	-1.40458	-177.184	98.3471	179.253	-172.53	Beta	Alpha-R	N/A	134.616	2.85155	3.20041	GLY	GLN	3.20041	2.85155
2CAR	1.09	B	116	SHEET	SHEET	SHEET	-122.249	130.144	178.244	178.957	-124.744	123.452	164.933	-122.48	132.436	169.605	Beta	Beta	Beta	131.753	3.96823	3.94292	LEU	THR	3.94292	3.96823
2CE2	1	X	80	SHEET	SHEET	SHEET	-89.5175	115.582	-170.172	-143.976	-113.279	61.1987	142.746	-91.9898	107.468	175.52	Beta	Beta	Beta	123.155	3.67408	3.61437	LEU	VAL	3.61437	3.67408
2CE2	1	X	51	SHEET	SHEET	SHEET	-143.98	168.027	170.569	58.1895	-108.24	-1.73349	165.114	-74.0058	119.801	-178.149	Beta	Alpha-R	Beta	135.417	4.12108	3.43992	THR	LEU	3.43992	4.12108
2CI1	1.08	A	73	N/A	N/A	N/A	-69.8665	-16.4635	171.305	63.2236	-56.3367	-30.5834	-166.799	-101.376	16.6654	-168.556	Alpha-R	Alpha-R	Alpha-R	116.285	2.97611	2.92678	ASP	VAL	2.92678	2.97611
2CI1	1.08	A	221	N/A	SHEET	HELIX	-144.122	170.393	179.07	64.2957	-123.822	117.077	173.517	-91.1926	113.696	-175.14	Beta	Beta	Beta	132.519	4.14399	3.9297	ASN	ILE	3.9297	4.14399
2CI1	1.08	A	177	SHEET	SHEET	N/A	-161.582	167.091	179.369	68.4647	-175.706	164.095	170.487	-142.191	15.1889	177.043	Beta	Beta	N/A	107.583	4.19284	4.29975	PHE	SER	4.29975	4.19284
2CNQ	1	A	202	HELIX	HELIX	HELIX	-68.9997	-37.9408	178.189	-63.1504	-59.4811	-45.996	-176.578	-60.9975	-45.661	-179.374	Alpha-R	Alpha-R	Alpha-R	100.631	3.00387	2.89604	LYS	LYS	2.89604	3.00387
2CZQ	1.05	A	125	N/A	SHEET	N/A	-74.9059	-11.9854	-172.223	51.7781	-81.6523	121.439	172.269	-78.8904	-2.20623	165.846	Alpha-R	Beta	Alpha-R	123.817	3.31802	3.2404	THR	ASN	3.2404	3.31802
2D5M	1.05	A	40	SHEET	N/A	SHEET	-148.652	151.82	171.972	-164.785	-96.2714	-16.1276	177.537	-114.904	-27.2329	-174.951	Beta	Alpha-R	N/A	122.655	4.08406	3.6122	CYS	SER	3.6122	4.08406
2D5M	1.05	A	147	HELIX	HELIX	HELIX	-100.324	4.95339	-178.445	-67.8888	-99.1502	147.172	171.374	-64.4675	-17.2266	-175.998	Alpha-R	Beta	Alpha-R	112.48	3.69819	3.52691	SER	LEU	3.52691	3.69819
2D5M	1.05	A	39	SHEET	SHEET	SHEET	-114.904	-27.2329	-174.951	59.0556	-148.652	151.82	171.972	-65.0577	137.225	178.308	N/A	Beta	Beta	118.992	3.78912	4.08406	ILE	CYS	4.08406	3.78912
2DKO	1.06	A	148	HELIX	HELIX	N/A	-126.797	84.6616	-168.922	-178.101	-69.0629	-27.4352	178.952	-107.001	-20.2785	175.131	Beta	Alpha-R	Alpha-R	112.148	3.94524	2.97836	ARG	ARG	2.97836	3.94524
2DKO	1.06	B	220	HELIX	HELIX	HELIX	-64.176	-39.8086	179.726	-70.4593	-63.0478	-42.1714	-179.362	-60.3755	-48.8974	-178.055	Alpha-R	Alpha-R	Alpha-R	99.0738	2.92089	2.90931	LEU	ALA	2.90931	2.92089
2DKO	1.06	A	163	N/A	N/A	N/A	-62.317	154.304	176.74	-63.7651	-124.316	25.0014	-173.691	-168.781	152	171.122	Beta	N/A	Beta	140.322	2.96371	3.96993	ALA	ARG	3.96993	2.96371
2DKO	1.06	B	184	N/A	N/A	N/A	-111.381	121.715	-171.532	46.1285	-76.1925	127.028	171.901	-68.2377	-37.813	-178.952	Beta	Beta	Alpha-R	111.748	3.63866	3.16068	ALA	HIS	3.16068	3.63866
2DKO	1.06	A	170	N/A	N/A	N/A	-76.434	-15.0164	-179.27	56.3751	70.3647	174.681	174.695	-96.3227	113.428	-176.52	Alpha-R	N/A	Beta	74.3713	3.19938	3.11634	ASP	GLY	3.11634	3.19938
2DKO	1.06	A	47	SHEET	SHEET	SHEET	-126.12	102.206	179.345	173.992	-95.1819	123.412	179.165	-81.9237	147.884	167.362	Beta	Beta	Beta	123.478	3.994	3.51162	LEU	ILE	3.51162	3.994
2DKO	1.06	A	116	SHEET	SHEET	SHEET	-129.301	130.858	176.202	174.953	-115.436	128.077	179.789	-125.814	134.282	171.007	Beta	Beta	Beta	124.614	4.00966	3.82907	VAL	VAL	3.82907	4.00966
2DKO	1.06	B	264	SHEET	SHEET	N/A	-140.144	111.665	-178.457	176.657	-90.0538	123.499	-178.969	-69.6484	172.386	-173.053	Beta	Beta	Beta	122.945	3.98571	3.45877	PRO	ILE	3.45877	3.98571
2E4T	0.96	A	296	N/A	N/A	N/A	-128.106	169.443	176.92	59.6199	66.0113	76.5543	174.545	-75.1635	-13.7264	176.495	Beta	Alpha-L	Alpha-R	75.7494	4.0119	3.05447	ILE	PHE	3.05447	4.0119
2E4T	0.96	A	510	SHEET	SHEET	SHEET	-125.075	153.157	170.845	79.4258	-124.522	116.644	-179.369	-119.264	124.714	-177.485	Beta	Beta	Beta	129.599	3.9321	3.99387	ALA	HIS	3.99387	3.9321
2E4T	0.96	A	424	SHEET	SHEET	SHEET	-154.659	109.001	-173.614	176	-114.157	139.028	173.417	-61.9844	130.925	-176.565	Beta	Beta	Beta	118.435	4.17854	3.7911	LYS	GLU	3.7911	4.17854
2FDN	0.94	A	47	N/A	N/A	HELIX	-99.1477	117.474	-176.223	-178.799	-65.7888	-23.7237	-176.664	-109.327	13.0085	-175.114	Beta	Alpha-R	Alpha-R	119.496	3.48633	2.912	VAL	PRO	2.912	3.48633
2FDN	0.94	A	43	HELIX	HELIX	HELIX	-61.4496	-46.5469	176.18	52.2467	-61.7931	-36.9438	-177.666	-66.0636	-34.0507	178.406	Alpha-R	Alpha-R	Alpha-R	103.919	2.99161	2.92464	ALA	ALA	2.92464	2.99161
2FDN	0.94	A	14	N/A	HELIX	N/A	-75.5203	-25.3453	-169.54	54.5375	-58.3534	-48.4611	179.798	-63.7969	-32.7482	-175.117	Alpha-R	Alpha-R	Alpha-R	97.6634	3.17998	2.80288	ALA	GLU	2.80288	3.17998
2FDN	0.94	A	40	N/A	N/A	N/A	-68.9107	-25.0265	-178.736	71.6945	80.9832	6.66642	-174.546	68.5631	27.5181	-177.358	Alpha-R	Alpha-L	Alpha-L	132.449	2.97825	3.3486	ASP	GLY	3.3486	2.97825
2FDN	0.94	A	11	N/A	N/A	N/A	-77.411	-23.306	-179.122	72.6794	84.651	-4.24531	-167.942	60.8826	42.4665	178.175	Alpha-R	Alpha-L	Alpha-L	136.951	3.23725	3.34072	SER	GLY	3.34072	3.23725
2FDN	0.94	A	18	N/A	N/A	HELIX	-69.2804	124.699	-176.815	176.065	-68.3456	-16.6943	-176.008	-90.2569	-12.9917	179.789	Beta	Alpha-R	Alpha-R	124.842	2.99418	3.00794	GLU	PRO	3.00794	2.99418
2FDN	0.94	A	37	N/A	N/A	N/A	-57.6516	135.665	-179.767	177.942	-119.047	18.3051	165.972	-122.08	-32.06	-177.729	Beta	N/A	N/A	142.258	2.8672	3.92995	THR	ILE	3.92995	2.8672
2FDN	0.94	A	8	N/A	N/A	N/A	-46.8027	130.035	177.706	179.303	-101.303	4.84291	172.872	-58.4808	-21.7946	178.119	Beta	Alpha-R	Alpha-R	136.899	2.68307	3.72674	ALA	ILE	3.72674	2.68307
2FWH	0.99	A	461	HELIX	HELIX	N/A	-89.7299	108.544	-176.023	-179.763	-58.4921	-41.7119	-178.74	-90.869	-5.53981	-176.908	Beta	Alpha-R	Alpha-R	100.978	3.3618	2.8524	TRP	VAL	2.8524	3.3618
2FWH	0.99	A	464	HELIX	HELIX	HELIX	-61.7443	-45.4075	178.841	-67.0394	-64.8057	-33.9846	176.815	-61.0095	-34.7551	177.379	Alpha-R	Alpha-R	Alpha-R	105.614	2.93643	2.99028	ALA	LYS	2.99028	2.93643
2GG2	1	A	45	HELIX	HELIX	HELIX	-62.0528	-48.1633	-177.772	-69.2402	-63.6906	-43.1848	179.358	-61.5921	-45.0297	177.49	Alpha-R	Alpha-R	Alpha-R	100.362	2.97234	2.89871	ILE	ASN	2.89871	2.97234
2GG2	1	A	126	HELIX	HELIX	HELIX	-61.7145	-43.5293	-178.589	-67.8864	-60.6796	-49.2747	-179.298	-58.5705	-47.8316	-179.833	Alpha-R	Alpha-R	Alpha-R	97.4538	2.89214	2.93121	LEU	ARG	2.93121	2.89214
2GG2	1	A	59	N/A	N/A	N/A	-79.8982	-32.8376	-174.263	-67.1538	-66.3475	116.812	-179.593	-77.2374	-18.2327	-179.088	Alpha-R	Beta	Alpha-R	117.911	3.23624	2.9481	ALA	LEU	2.9481	3.23624
2GG2	1	A	70	SHEET	SHEET	N/A	-98.5752	132.662	-178.901	-59.9766	-128.845	114.108	-170.265	-132.943	159.494	171.441	Beta	Beta	Beta	132.47	3.61491	3.95116	VAL	ILE	3.95116	3.61491
2GG2	1	A	169	N/A	SHEET	N/A	-150.396	162.395	164.947	-58.5743	-70.8244	176.692	-168.636	-125.697	153.884	-171.313	Beta	Beta	Beta	81.4152	4.14956	3.18709	TYR	GLY	3.18709	4.14956
2GG2	1	A	78	SHEET	N/A	SHEET	-167.798	163.606	171.739	64.8189	66.1388	21.5534	176.295	-84.4719	-44.5249	-175.658	Beta	Alpha-L	Alpha-R	123.958	4.21728	3.11688	VAL	HIS	3.11688	4.21728
2GG2	1	A	245	SHEET	SHEET	SHEET	-147.859	168.864	173.231	71.6798	-129.229	128.071	-179.668	168.732	-126.52	174.988	Beta	Beta	N/A	124.607	4.1216	4.01163	GLY	GLU	4.01163	4.1216
2GKG	1	A	66	HELIX	HELIX	HELIX	-54.7668	-42.8518	177.625	-172.474	-58.8095	59.945	-146.833	-64.1339	-46.4962	176.717	Alpha-R	N/A	Alpha-R	101.682	3.02337	2.90724	ILE	GLY	2.90724	3.02337
2HBW	1.05	A	58	SHEET	SHEET	SHEET	-140.754	117.839	178.058	-171.369	-66.2931	136.896	-170.989	-129.086	167.577	175.657	Beta	Beta	Beta	101.155	4.05339	3.07867	VAL	LEU	3.07867	4.05339
2HBW	1.05	A	19	SHEET	N/A	SHEET	-79.7135	125.258	179.062	-64.5042	-86.1945	-15.7077	176.906	-102.667	138.442	-178.849	Beta	Alpha-R	Beta	124.432	3.20694	3.4274	GLN	LEU	3.4274	3.20694
2HBW	1.05	A	185	SHEET	SHEET	N/A	-87.8203	149.01	174.901	-63.8735	-147.492	155.394	177.016	80.4839	-8.06034	-173.418	Beta	Beta	Alpha-L	113.943	3.39326	4.1572	GLY	TYR	4.1572	3.39326
2HBW	1.05	A	31	N/A	N/A	N/A	56.4417	44.2331	177.086	-61.8195	-106.523	53.9874	-150.154	-68.0102	-16.6864	175.781	Alpha-L	N/A	Alpha-R	121.685	2.854	3.70026	GLU	THR	3.70026	2.854
2HBW	1.05	A	60	N/A	N/A	SHEET	-73.8635	-35.9441	-168.525	-60.1118	-77.4623	-23.3274	-178.211	-66.2931	136.896	-170.989	Alpha-R	Alpha-R	Beta	117.386	3.12163	3.11675	LEU	GLU	3.11675	3.12163
2HBW	1.05	A	126	HELIX	HELIX	HELIX	-64.2332	-46.7868	-177.934	57.5138	-75.0424	-30.6866	176.791	-96.5645	176.727	-167.699	Alpha-R	Alpha-R	Beta	111.436	2.82347	3.22438	ASP	SER	3.22438	2.82347
2II2	1.1	A	298	HELIX	HELIX	HELIX	-61.9855	-49.7116	176.805	-176.165	-56.9148	-43.8499	178.128	-61.4669	-44.4657	-178.126	Alpha-R	Alpha-R	Alpha-R	102.669	3.00419	2.89607	ALA	LEU	2.89607	3.00419
2II2	1.1	A	219	HELIX	HELIX	HELIX	-64.8889	-36.2022	178.1	-73.6143	-63.2408	-47.4049	-179.811	-63.4167	-40.3179	178.01	Alpha-R	Alpha-R	Alpha-R	99.8306	2.96647	2.96475	LEU	ILE	2.96475	2.96647
2II2	1.1	A	55	HELIX	HELIX	HELIX	-87.7613	-37.9127	-173.151	-71.2499	-98.4822	125.28	-174.889	-66.8495	-32.6838	-175.927	Alpha-R	Beta	Alpha-R	125.124	3.26555	3.60159	LYS	ILE	3.60159	3.26555
2II2	1.1	A	138	HELIX	HELIX	HELIX	-60.7779	-52.4643	-175.532	-65.8774	-68.0247	-49.2295	-173.983	-58.9104	-42.2346	-177.853	Alpha-R	Alpha-R	Alpha-R	99.2047	2.90598	3.02638	LEU	HIS	3.02638	2.90598
2II2	1.1	A	71	HELIX	HELIX	HELIX	-70.4725	151.587	-168.114	67.1666	-65.6259	-41.2208	-177.007	-82.4917	167.014	166.442	Beta	Alpha-R	Beta	104.421	3.11445	2.989	ASP	ASN	2.989	3.11445
2II2	1.1	A	272	N/A	N/A	HELIX	-43.3137	-44.7143	-167.548	177.094	-103.657	-25.095	-178.845	-53.7028	-24.0199	168.993	Alpha-R	Alpha-R	Alpha-R	118.072	2.86599	3.64015	ALA	TRP	3.64015	2.86599
2JFR	0.83	A	174	N/A	N/A	N/A	-152.513	168.906	-178.231	61.081	-170.608	-175.339	-174.827	-80.6783	100.346	-174.384	Beta	Beta	Beta	111.723	4.11671	4.19783	ASP	GLY	4.19783	4.11671
2JFR	0.83	A	24	SHEET	SHEET	SHEET	-143.915	162.88	-175.185	65.0556	-142.585	137.239	174.91	-145.995	156.355	175.321	Beta	Beta	Beta	120.561	4.08533	4.13166	ALA	LEU	4.13166	4.08533
2JHF	1	A	132	SHEET	N/A	SHEET	-145.551	125.74	-175.271	-176.113	59.5063	26.1865	-177.976	-129.601	142.699	174.42	Beta	Alpha-L	Beta	117.048	4.15623	2.97565	THR	ARG	2.97565	4.15623
2JHF	1	A	174	HELIX	HELIX	HELIX	-155.062	-77.9511	-160.27	-172.833	-65.7075	-41.9996	176.715	-65.7501	-15.3684	172.613	N/A	Alpha-R	Alpha-R	103.079	4.16133	2.90924	GLY	GLY	2.90924	4.16133
2JHF	1	B	103	HELIX	HELIX	HELIX	-60.9771	-34.9496	179.256	-76.7763	-77.6851	-14.5664	179.438	-69.7304	-46.9298	178.587	Alpha-R	Alpha-R	Alpha-R	120.047	2.89028	3.30555	VAL	LYS	3.30555	2.89028
2JHF	1	B	240	SHEET	SHEET	SHEET	-133.9	144.417	179.188	-70.4887	-131.085	138.64	173.992	-162.969	154.85	173.848	Beta	Beta	Beta	120.647	4.10544	4.09401	GLU	VAL	4.09401	4.10544
2JHF	1	A	211	HELIX	HELIX	HELIX	-60.1867	-38.5122	176.242	-67.7176	-67.5007	-43.9963	177.49	-67.6129	-41.708	175.722	Alpha-R	Alpha-R	Alpha-R	101.482	2.99336	3.05739	GLY	LYS	3.05739	2.99336
2JHF	1	B	195	SHEET	SHEET	SHEET	-116.683	148.283	169.959	-60.8489	-125.325	130.408	-174.384	-107.137	124.503	-179.26	Beta	Beta	Beta	123.914	3.91875	4.04756	THR	ALA	4.04756	3.91875
2JHF	1	A	282	HELIX	N/A	HELIX	-84.6567	150.349	-171.933	-20.8228	-56.7668	134.828	-166.425	-81.0766	-9.94008	172.697	Beta	Beta	Alpha-R	99.608	3.37495	2.88407	CYS	GLN	2.88407	3.37495
2JHF	1	B	170	HELIX	HELIX	HELIX	-43.9836	-33.2225	-177.126	53.9078	-62.1436	-25.0624	172.176	-72.9505	-18.0571	166.991	Alpha-R	Alpha-R	Alpha-R	120.519	2.70276	3.03798	VAL	LEU	3.03798	2.70276
2JHF	1	A	9	SHEET	SHEET	SHEET	-152.223	175.301	175.505	70.3245	-89.9439	145.373	173.042	-94.5325	126.719	-178.904	Beta	Beta	Beta	113.044	4.18882	3.43308	LYS	LYS	3.43308	4.18882
2JHF	1	B	100	HELIX	HELIX	N/A	-86.2263	169.075	-176.014	76.561	-64.6237	-30.0889	177.706	-120.09	-16.8085	-177.384	Beta	Alpha-R	N/A	110.963	3.38535	2.92796	LYS	ARG	2.92796	3.38535
2JHF	1	B	281	HELIX	HELIX	HELIX	-77.3905	-11.2535	175.46	81.5946	-82.2872	151.033	-173.161	-61.9675	-32.7833	-175.713	Alpha-R	Beta	Alpha-R	99.9881	3.2448	3.33559	SER	CYS	3.33559	3.2448
2JHF	1	A	97	N/A	N/A	N/A	-69.8174	-26.3244	-178.458	85.224	78.5159	-8.41397	-172.91	-138.522	89.3086	-178.637	Alpha-R	Alpha-L	Beta	138.953	3.11653	3.37619	GLN	GLY	3.37619	3.11653
2JHF	1	B	111	N/A	N/A	N/A	-46.1685	137.088	-177.01	171.151	-69.3819	-7.89722	172.733	-87.4202	73.1711	-174.969	Beta	Alpha-R	Beta	130.626	2.80538	3.08298	PHE	LEU	3.08298	2.80538
2JHF	1	B	46	HELIX	HELIX	N/A	-103.009	150.679	176.606	174.576	-57.546	-27.9218	175.812	-96.3715	106.184	-178.238	Beta	Alpha-R	Beta	109.832	3.7063	2.8599	ILE	ARG	2.8599	3.7063
2NRL	0.91	A	10	N/A	HELIX	HELIX	-123.656	12.8326	-175.589	-65.421	-82.7304	-14.5326	-178.313	-67.3422	-9.6286	176.364	N/A	Alpha-R	Alpha-R	120.662	4.0116	3.25514	LYS	TRP	3.25514	4.0116
2NWF	1.1	A	149	SHEET	N/A	SHEET	-104.031	111.704	-178.954	-176.734	-75.385	-12.8616	-178.982	-135.524	133.418	175.596	Beta	Alpha-R	Beta	124.209	3.63313	3.19822	PHE	PRO	3.19822	3.63313
2NWF	1.1	A	129	N/A	N/A	N/A	-54.6877	134.042	-177.057	178.274	-77.7277	-3.20555	172.978	-137.073	107.267	-179.481	Beta	Alpha-R	Beta	133.533	2.81345	3.25609	VAL	THR	3.25609	2.81345
2NXV	1.1	B	73	HELIX	N/A	HELIX	-83.9826	141.628	177.512	-68.097	-117.73	-4.51236	-176.83	-89.4101	-9.02536	-175.715	Beta	N/A	Alpha-R	127.401	3.34632	3.84898	ARG	LYS	3.84898	3.34632
2NXV	1.1	B	183	HELIX	HELIX	HELIX	-68.1694	-36.6104	178.623	-66.0067	-68.5882	-41.5787	174.802	-62.9955	-40.8724	-179.35	Alpha-R	Alpha-R	Alpha-R	99.5142	3.02011	3.02032	LEU	LEU	3.02032	3.02011
2NXV	1.1	B	21	SHEET	SHEET	SHEET	-109.302	133.143	-177.88	-65.9365	-129.092	149.008	177.339	-101.181	110.141	-177.62	Beta	Beta	Beta	118.824	3.71357	3.91891	VAL	SER	3.91891	3.71357
2NXV	1.1	A	234	SHEET	N/A	SHEET	-133.038	161.568	177.791	-58.9974	-62.9258	-19.0791	177.005	-95.8275	138.238	168.26	Beta	Alpha-R	Beta	118.906	4.09579	2.90489	HIS	VAL	2.90489	4.09579
2NXV	1.1	B	148	SHEET	SHEET	N/A	-162.075	156.039	178.4	67.1106	-70.9001	140.478	-176.95	-75.2386	151.411	175.661	Beta	Beta	Beta	106.656	4.17676	3.07557	PRO	ARG	3.07557	4.17676
2NXV	1.1	B	156	N/A	SHEET	N/A	-66.0723	-26.7816	-178.348	67.9538	-159.817	116.608	168.094	-72.3453	-8.08656	-171.483	Alpha-R	Beta	Alpha-R	123.911	2.84676	4.18481	GLU	PHE	4.18481	2.84676
2NXV	1.1	B	81	SHEET	SHEET	SHEET	-133.108	166.188	174.349	71.4838	-82.0627	162.574	-175.684	-117.22	110.699	-176.889	Beta	Beta	Beta	96.3133	3.97162	3.31014	PHE	HIS	3.31014	3.97162
2NYB	1.1	A	79	HELIX	N/A	HELIX	-76.9177	-9.37203	-175.658	-72.0074	-119.791	150.248	179.093	-71.8193	-21.8412	176.253	Alpha-R	Beta	Alpha-R	113.794	3.30433	3.85589	ASN	LEU	3.85589	3.30433
2O90	1.07	A	50	HELIX	N/A	HELIX	-94.5157	164.061	167.144	84.7166	-89.7082	105.822	-169.964	-93.7726	-11.7609	-177.049	Beta	Beta	Alpha-R	135.804	3.49428	3.55017	ASP	LEU	3.55017	3.49428
2OB3	1.04	B	59	SHEET	SHEET	N/A	-144.809	127.617	177.202	-177.81	-98.1665	103.553	-167.534	-81.0098	-47.4542	-179.873	Beta	Beta	Alpha-R	136.234	4.06642	3.61327	ILE	GLY	3.61327	4.06642
2OB3	1.04	A	227	SHEET	SHEET	SHEET	-111.286	121.694	175.967	178.08	-88.4915	103.077	-169.103	-131.007	131.353	168.86	Beta	Beta	Beta	136.153	3.82518	3.45589	VAL	ILE	3.45589	3.82518
2OSX	1.1	A	302	N/A	N/A	SHEET	-127.956	64.2709	177.418	-165.493	-75.8775	168.593	178.287	-112.909	126.955	-172.324	Beta	Beta	Beta	87.0759	3.96202	3.16205	TYR	PRO	3.16205	3.96202
2OSX	1.1	A	270	SHEET	SHEET	SHEET	-108.796	127.99	-175.215	-60.1479	-118.689	143.52	-179.502	-98.4995	119.406	-172.29	Beta	Beta	Beta	117.853	3.69061	3.87302	VAL	VAL	3.87302	3.69061
2OV0	0.75	A	92	N/A	N/A	SHEET	-96.1106	126.963	-175.942	176.497	-55.3878	-54.7178	179.057	-145.4	173.595	175.356	Beta	Alpha-R	Beta	92.8587	3.50626	2.83653	HIS	THR	2.83653	3.50626
2PND	1	A	94	SHEET	SHEET	SHEET	-107.938	127.044	-178.739	-177.137	-123.336	124.695	178.645	-111.539	132.586	167.52	Beta	Beta	Beta	128.453	3.77692	3.94982	THR	GLU	3.94982	3.77692
2PND	1	A	22	N/A	N/A	N/A	-148.772	109.527	-174.45	-174.955	-133.338	143.289	170.275	-67.9288	137.861	165.133	Beta	Beta	Beta	120.73	4.16098	4.0098	GLN	ILE	4.0098	4.16098
2PPN	0.92	A	22	SHEET	SHEET	SHEET	-87.9338	125.91	178.406	-61.8409	-109.252	117.427	-172.398	-88.4961	118.478	174.778	Beta	Beta	Beta	129.465	3.49815	3.72987	THR	VAL	3.72987	3.49815
2PVB	0.91	A	18	HELIX	N/A	HELIX	-113.881	26.8325	-177.955	64.4265	-61.8615	-34.7196	179.068	-68.0165	-20.6044	176.451	N/A	Alpha-R	Alpha-R	108.088	3.80001	2.93056	ALA	SER	2.93056	3.80001
2QOL	1.07	A	849	N/A	HELIX	N/A	-75.1955	126.943	171.068	-170.534	-53.1995	136.733	178.263	59.2059	28.0469	-178.088	Beta	Beta	Alpha-L	97.4413	3.13272	2.87707	ASP	PRO	2.87707	3.13272
2QOL	1.07	A	760	SHEET	SHEET	N/A	-103.957	138.412	-174.16	-69.4084	-137.805	138.296	-179.768	-77.2322	129.913	-175.852	Beta	Beta	Beta	121.572	3.64327	4.05856	VAL	LYS	4.05856	3.64327
2QOL	1.07	A	860	HELIX	HELIX	HELIX	-61.1192	-27.7523	-177.348	-68.4281	-99.6524	-56.9046	146.636	-66.6447	-44.0614	174.745	Alpha-R	Alpha-R	Alpha-R	148.612	3.01495	3.63185	ASP	TRP	3.63185	3.01495
2QOL	1.07	A	636	SHEET	SHEET	SHEET	-160.352	-168.848	-176.526	25.6056	-134.432	164.972	-173.43	-128.026	132.889	170.885	Beta	Beta	Beta	110.557	4.19115	4.0077	VAL	SER	4.0077	4.19115
2R0X	1.06	A	133	SHEET	SHEET	SHEET	-129.331	110.336	174.389	-62.2193	-74.8726	128.857	-179.529	-90.8415	123.151	-164.407	Beta	Beta	Beta	116.718	3.91811	3.13199	ILE	LYS	3.13199	3.91811
2R0X	1.06	A	50	SHEET	SHEET	SHEET	-92.1664	138.591	-174.298	-58.4725	-137.46	141.209	172.911	-131.98	128.227	173.511	Beta	Beta	Beta	119.371	3.49087	4.02106	VAL	ILE	4.02106	3.49087
2R0X	1.06	A	117	SHEET	SHEET	SHEET	-136.336	152.772	166.52	-54.5272	-100.337	134.868	-179.23	-94.2034	128.968	-165.345	Beta	Beta	Beta	118.828	4.04795	3.69347	ASP	GLU	3.69347	4.04795
2RBK	1	A	104	SHEET	SHEET	N/A	-152.003	133.239	173.049	-169.852	-91.2046	137.368	177.48	-79.7513	163.164	177.263	Beta	Beta	Beta	113.352	4.16725	3.56585	PRO	ILE	3.56585	4.16725
2RBK	1	A	169	N/A	SHEET	N/A	-80.8577	155.505	165.975	-68.1167	-89.4541	146.139	-179.431	-116.591	-6.02722	-175.433	Beta	Beta	N/A	108.33	3.20379	3.48966	THR	GLU	3.48966	3.20379
2RBK	1	A	97	HELIX	HELIX	HELIX	-63.3531	-40.9816	178.939	-66.2094	-64.6305	-43.4455	178.386	-61.412	-50.723	-178.305	Alpha-R	Alpha-R	Alpha-R	98.665	2.94253	2.92751	PHE	GLU	2.92751	2.94253
2RBK	1	A	73	SHEET	SHEET	SHEET	-122.859	138.113	-177.541	-59.354	-150.694	154.708	-179.082	-152.225	105.328	-172.401	Beta	Beta	Beta	116.464	3.88425	4.15844	TYR	PHE	4.15844	3.88425
2RBK	1	A	115	SHEET	N/A	SHEET	-109.293	128.995	177.193	-58.6756	48.1786	52.7976	-178.701	-130.268	142.595	179.564	Beta	Alpha-L	Beta	101.569	3.76422	2.88397	VAL	GLN	2.88397	3.76422
2RH2	0.96	A	47	N/A	N/A	SHEET	-148.894	120.029	172.837	-56.3266	-135.794	43.1619	141.663	-152.172	165.543	-173.422	Beta	N/A	Beta	108.42	4.16886	4.06015	TYR	THR	4.06015	4.16886
2RK3	1.05	A	53	N/A	N/A	SHEET	-94.3207	118.736	-177.948	-175.823	-70.7512	157.745	176.13	-115.506	132.863	178.243	Beta	Beta	Beta	91.1234	3.44272	3.01109	ILE	PRO	3.01109	3.44272
2RK3	1.05	A	46	N/A	N/A	SHEET	-79.8401	176.203	-171.064	-64.5712	-59.5042	-35.3633	179.169	-86.6861	110.285	-179.481	Beta	Alpha-R	Beta	114.148	3.25777	2.95398	GLN	SER	2.95398	3.25777
2RK3	1.05	A	106	N/A	N/A	SHEET	73.545	-111.463	171.764	176.948	-87.3315	-13.421	-179.503	-134.945	145.972	167.374	PPII-R	Alpha-R	Beta	124.937	3.17569	3.46967	ILE	ALA	3.46967	3.17569
2V1M	1	A	41	N/A	N/A	N/A	-86.1445	-18.5388	-170.456	-65.8326	-116.695	49.9889	179.28	-156.536	144.493	-178.58	Alpha-R	N/A	Beta	157.628	3.34442	3.83303	ALA	LYS	3.83303	3.34442
2V1M	1	A	34	SHEET	SHEET	SHEET	-119.691	140.779	172.046	-60.1608	-115.721	112.952	-172.283	-77.4487	134.754	-179.366	Beta	Beta	Beta	130.408	3.8512	3.8526	VAL	LEU	3.8526	3.8512
2V1M	1	A	72	N/A	N/A	SHEET	-154.746	130.766	-177.375	174.32	-103.659	24.3906	-178.833	-61.927	146.51	-179.454	Beta	Alpha-R	Beta	148.551	4.15375	3.73361	PRO	ASN	3.73361	4.15375
2V89	1.1	A	1458	N/A	HELIX	HELIX	-68.5657	-24.1073	175.134	-64.5198	-89.4737	2.71308	179.188	-69.413	-31.1724	178.29	Alpha-R	Alpha-R	Alpha-R	137.327	3.09941	3.48819	GLN	MET	3.48819	3.09941
2V89	1.1	B	458	HELIX	HELIX	HELIX	-67.1361	-19.9465	176.529	-63.3245	-90.3324	-3.23576	-178.098	-64.5473	-35.6172	-179.548	Alpha-R	Alpha-R	Alpha-R	133.582	3.1026	3.51775	GLN	MET	3.51775	3.1026
2V89	1.1	A	1420	N/A	N/A	N/A	-164.4	166.165	-175.955	70.3184	-62.14	-18.3084	176.371	-86.6295	-17.7888	-175.926	Beta	Alpha-R	Alpha-R	118.89	4.24428	2.92369	CYS	PRO	2.92369	4.24428
2V89	1.1	B	420	N/A	N/A	N/A	-166.962	168.931	-177.4	71.4491	-64.4479	-17.3808	-179.877	-84.2661	-17.2186	-174.086	Beta	Alpha-R	Alpha-R	121.459	4.29241	2.96513	CYS	PRO	2.96513	4.29241
2V89	1.1	B	478	N/A	N/A	N/A	-65.5499	167.115	-173.751	75.3785	-62.8109	-28.9894	178.418	-124.23	126.572	-176.269	Beta	Alpha-R	Beta	112.281	3.05158	2.81447	TYR	ASN	2.81447	3.05158
2V89	1.1	B	419	N/A	N/A	N/A	-84.2661	-17.2186	-174.086	78.6968	-166.962	168.931	-177.4	-88.5318	107.288	-163.921	Alpha-R	Beta	Beta	106.963	3.21686	4.29241	THR	CYS	4.29241	3.21686
2V89	1.1	A	1478	N/A	N/A	N/A	-73.0941	173.649	-177.025	78.7708	-61.3739	-28.5609	177.227	-119.359	129.862	-176.524	Beta	Alpha-R	Beta	112.76	3.14799	2.962	TYR	ASN	2.962	3.14799
2V89	1.1	A	1419	N/A	N/A	N/A	-86.6295	-17.7888	-175.926	80.322	-164.4	166.165	-175.955	-87.0451	106.245	-163.949	Alpha-R	Beta	Beta	107.03	3.26359	4.24428	THR	CYS	4.24428	3.26359
2V89	1.1	B	446	SHEET	N/A	SHEET	-84.5086	128.822	-176.534	171.668	-87.6649	9.36487	178.371	-87.7225	127.857	170.983	Beta	Alpha-R	Beta	140.65	3.47179	3.37917	TYR	SER	3.37917	3.47179
2V89	1.1	A	1446	N/A	N/A	N/A	-98.1583	131.366	-176.823	172.954	-85.6034	4.37497	177.838	-90.7862	127.06	174.071	Beta	Alpha-R	Beta	136.874	3.60621	3.4268	TYR	SER	3.4268	3.60621
2V89	1.1	A	1423	N/A	N/A	N/A	-58.1469	129.569	-178.461	175.874	-105.56	-0.0929193	-171.345	-106.405	11.6534	-174.261	Beta	Alpha-R	Alpha-R	134.234	2.7957	3.82757	THR	ASP	3.82757	2.7957
2V89	1.1	B	423	N/A	N/A	N/A	-53.7816	128.436	178.311	176.406	-106.871	0.193637	179.364	-110.765	12.8437	-171.551	Beta	Alpha-R	N/A	130.667	2.81586	3.72809	THR	ASP	3.72809	2.81586
2V8F	1.1	A	15	N/A	SHEET	N/A	-95.683	-5.60415	-176.728	-64.6763	-110.462	139.709	174.672	74.9241	4.67089	-177.992	Alpha-R	Beta	Alpha-L	119.974	3.42161	3.74838	GLY	CSX	3.74838	3.42161
2V8F	1.1	A	83	N/A	SHEET	N/A	63.6606	37.7374	177.807	-64.0314	-123.18	160.987	162.999	-131.166	-73.8846	172.874	Alpha-L	Beta	N/A	113.539	2.94767	3.90259	ASP	THR	3.90259	2.94767
2V8F	1.1	A	25	N/A	N/A	N/A	-105.651	-108.811	177.9	-61.7113	-78.3498	-46.6436	-179.004	-128.989	5.56611	-176.52	N/A	Alpha-R	N/A	97.803	3.68999	3.19506	TYR	ASP	3.19506	3.68999
2V8F	1.1	A	70	SHEET	SHEET	SHEET	-135.517	164.332	172.705	-58.7186	-111.386	144.461	172.71	-66.2742	132.334	179.121	Beta	Beta	Beta	113.899	4.11891	3.92283	LYS	SER	3.92283	4.11891
2V8F	1.1	B	12	HELIX	N/A	HELIX	-77.6212	-18.4971	177.668	168.808	-87.2637	4.62726	170.412	-93.2696	-10.3014	-164.849	Alpha-R	Alpha-R	Alpha-R	134.572	3.05457	3.1767	MET	ASP	3.1767	3.05457
2VFR	1.1	A	258	N/A	N/A	HELIX	-93.9578	159.594	174.868	-61.0164	-65.837	157.894	-171.914	-65.3028	-21.4157	-167.457	Beta	Beta	Alpha-R	90.671	3.51551	3.08542	ASN	THR	3.08542	3.51551
2VFR	1.1	A	319	SHEET	SHEET	SHEET	-112.451	136.045	-179.579	167.885	-123.227	129.45	175.382	-160.581	151.398	170.852	Beta	Beta	Beta	126.408	3.86321	3.93644	THR	GLU	3.93644	3.86321
2VXN	0.82	A	14	N/A	N/A	N/A	-94.3495	69.5541	-173.398	-174.009	-146.91	144.184	168.769	53.4626	-149.713	-173.349	Beta	Beta	PPII-R	120.547	3.44371	4.12545	LYS	ASN	4.12545	3.44371
2VXN	0.82	A	117	HELIX	HELIX	HELIX	-63.1951	-41.8338	179.775	-71.8444	-60.0305	-33.8342	-179.939	-64.7621	-41.6975	178.257	Alpha-R	Alpha-R	Alpha-R	108.569	2.87027	2.88939	ALA	LYS	2.88939	2.87027
2VXN	0.82	A	39	SHEET	SHEET	SHEET	-90.7944	145.233	-177.281	-61.6957	-133.96	135.32	169.398	-93.3376	111.876	172.25	Beta	Beta	Beta	120.761	3.45997	4.0056	GLN	VAL	4.0056	3.45997
2VXN	0.82	A	126	SHEET	SHEET	SHEET	-96.2162	138.344	179.17	-60.8088	-137.89	164.021	177.541	-95.1251	120.605	-173.003	Beta	Beta	Beta	106.935	3.50107	4.13581	ALA	ILE	4.13581	3.50107
2VZC	1.05	A	352	N/A	HELIX	HELIX	61.2961	37.4997	169.941	-62.523	-75.3809	115.179	-172.053	-82.0023	10.9205	171.206	Alpha-L	Beta	Alpha-R	126.89	2.92692	3.12287	ASN	ASP	3.12287	2.92692
2W72		A	104	HELIX	HELIX	HELIX	-67.8224	-29.4088	172.477	-71.5224	-71.0729	-36.9655	172.638	-61.2553	-44.1338	-178.461	Alpha-R	Alpha-R	Alpha-R	100.434	3.01337	3.04221	HIS	LEU	3.04221	3.01337
2W72		D	112	HELIX	HELIX	HELIX	-60.168	-39.3801	178.642	-68.8051	-67.3832	-39.5014	175.284	-56.9425	-46.123	176.526	Alpha-R	Alpha-R	Alpha-R	102.981	2.9471	3.06972	VAL	VAL	3.06972	2.9471
2W72		D	93	HELIX	HELIX	HELIX	-74.5168	-57.259	-164.289	179.488	-77.3089	-35.0033	-174.432	-66.9786	-32.9952	173.631	Alpha-R	Alpha-R	Alpha-R	112.382	3.22909	3.13857	HIS	ASP	3.13857	3.22909
2WFI	0.75	A	37	HELIX	HELIX	HELIX	-64.1937	-40.2011	-178.77	-70.2624	-64.4572	-38.8832	175.204	-67.249	-43.7116	179.03	Alpha-R	Alpha-R	Alpha-R	103.6	2.9505	2.95183	THR	GLU	2.95183	2.9505
2WFI	0.75	A	44	HELIX	HELIX	HELIX	-70.2008	-39.5576	-177.67	-69.6603	-86.1315	-23.2589	-173.369	-68.1296	-28.1245	173.428	Alpha-R	Alpha-R	Alpha-R	117.966	3.1103	3.32544	LEU	THR	3.32544	3.1103
2WFI	0.75	A	42	HELIX	HELIX	HELIX	-67.8527	-31.9003	174.572	-68.7283	-68.1296	-28.1245	173.428	-55.8998	-47.2864	-179.736	Alpha-R	Alpha-R	Alpha-R	110.134	3.03	3.05993	ARG	LEU	3.05993	3.03
2WFI	0.75	A	10	SHEET	SHEET	SHEET	-125.07	161.617	-178.499	-67.2839	-138.754	155.712	164.747	-125.518	132.182	-179.784	Beta	Beta	Beta	117.96	3.96713	4.03435	ARG	PHE	4.03435	3.96713
2WFI	0.75	A	33	HELIX	HELIX	N/A	-134.326	68.5315	-169.963	-63.2107	-66.6543	-38.3486	-178.666	-101.639	-44.5487	-170.668	Beta	Alpha-R	Alpha-R	94.3229	3.97069	2.92454	VAL	PRO	2.92454	3.97069
2WFI	0.75	A	174	SHEET	SHEET	SHEET	-161.282	166.61	-179.261	49.5343	166.474	-166.223	179.591	-154.232	157.481	-176.818	Beta	N/A	Beta	115.035	4.19233	4.16731	SER	GLY	4.16731	4.19233
2X5Y	1.05	A	831	HELIX	N/A	HELIX	-78.9776	135.363	-175.315	-179.343	-87.0012	-4.40853	-170.804	-96.181	-2.33091	-177.473	Beta	Alpha-R	Alpha-R	132.247	3.17568	3.34777	ASN	PRO	3.34777	3.17568
2X5Y	1.05	A	798	HELIX	HELIX	HELIX	-63.6705	-31.0166	-179.692	-67.3769	-92.9586	-33.4207	-171.782	-68.8622	-44.5654	-178.963	Alpha-R	Alpha-R	Alpha-R	100.351	2.9474	3.4131	ILE	SER	3.4131	2.9474
2X5Y	1.05	A	867	SHEET	SHEET	SHEET	-116.796	154.049	-177.226	-66.4715	-134.364	168.032	168.995	-162.392	163.802	173.55	Beta	Beta	Beta	110.177	3.86595	4.0247	SER	VAL	4.0247	3.86595
2XFR	0.97	A	93	N/A	N/A	N/A	-89.6904	130.2	176.455	-173.478	69.846	-146.656	-176.737	-76.2195	137.6	166.818	Beta	PPII-R	Beta	97.6937	3.50768	3.08899	GLN	GLY	3.08899	3.50768
2XFR	0.97	A	377	SHEET	SHEET	SHEET	-145.238	156.956	170.798	-89.9941	-121.701	164.16	160.294	-116.713	168.022	-178.664	Beta	Beta	Beta	106.639	4.10369	4.0376	ALA	GLU	4.0376	4.10369
2XFR	0.97	A	341	N/A	N/A	N/A	69.6686	17.878	-175.215	-52.8164	-65.7438	-19.0259	-176.183	-148.281	-175.182	-179.742	Alpha-L	Alpha-R	Beta	125.481	3.15996	2.99733	THR	ALA	2.99733	3.15996
2XFR	0.97	A	206	N/A	N/A	N/A	-121.575	21.8406	-174.212	47.2248	-92.3869	-0.929868	173.929	-114.358	58.5198	-170.012	N/A	Alpha-R	N/A	132.127	3.89737	3.48367	ILE	TYR	3.48367	3.89737
2XMJ	1.08	A	15	HELIX	HELIX	HELIX	-70.2278	-42.358	175.66	-62.7331	-58.3422	-43.1254	-179.638	-59.0064	-35.9106	177.208	Alpha-R	Alpha-R	Alpha-R	101.757	3.11303	2.89758	ALA	ALA	2.89758	3.11303
2XMJ	1.08	A	12	HELIX	HELIX	N/A	-165.451	177.677	-178.603	72.2704	-61.709	-34.5155	177.749	-95.2517	-20.5979	-169.784	Beta	Alpha-R	Alpha-R	106.467	4.20197	2.90447	ALA	GLU	2.90447	4.20197
2XU3	0.9	A	25	HELIX	HELIX	HELIX	-48.2716	-43.9119	179.853	58.5201	-56.3054	-38.2096	-179.386	-110.699	19.3959	179.059	Alpha-R	Alpha-R	N/A	111.48	2.73304	2.95905	SER	TRP	2.95905	2.73304
2XW6	1.08	B	99	HELIX	HELIX	HELIX	-62.2912	-42.0383	-178.626	-72.7474	-74.1365	-33.3168	175.175	-67.9682	-37.7784	177.996	Alpha-R	Alpha-R	Alpha-R	105.228	2.91912	3.09189	VAL	ASP	3.09189	2.91912
2XW6	1.08	C	20	HELIX	HELIX	HELIX	-64.6153	-32.5569	176.029	-70.573	-69.9433	-47.357	-176.844	-59.9583	-45.7642	179.148	Alpha-R	Alpha-R	Alpha-R	97.6403	2.9908	3.10625	PHE	GLN	3.10625	2.9908
2YKZ	0.84	A	119	HELIX	HELIX	HELIX	-72.3432	-45.0239	-179.954	-175.291	-57.4721	-69.3532	157.317	-57.6254	-39.5486	179.014	Alpha-R	Alpha-R	Alpha-R	104.248	2.79483	2.81368	ALA	HIS	2.81368	2.79483
2YKZ	0.84	A	116	HELIX	HELIX	HELIX	-56.4364	-44.4547	-176.377	-46.8551	-70.3099	-108.918	152.173	-69.8005	-37.8056	173.486	Alpha-R	N/A	Alpha-R	98.1391	2.85453	2.99984	SER	LYS	2.99984	2.85453
3A72	1.04	A	186	SHEET	SHEET	SHEET	-115.434	110.909	171.288	-176.521	-86.9027	143.517	178.247	-104.624	133.091	169.89	Beta	Beta	Beta	110.867	3.86904	3.49585	ILE	TYR	3.49585	3.86904
3A72	1.04	A	331	N/A	N/A	N/A	-148.879	134.311	-178.063	176.277	-82.1903	-8.44259	177.059	-65.6794	160.246	175.979	Beta	Alpha-R	Beta	127.162	4.124	3.26848	PRO	PRO	3.26848	4.124
3AJ4	1	A	90	SHEET	N/A	SHEET	-137.677	118.37	176.951	-170.733	-79.7658	16.2543	62.5346	-127.649	151.452	176.653	Beta	Alpha-R	Beta	87.8932	4.02845	3.32797	LEU	ALA	3.32797	4.02845
3AJ4	1	B	75	N/A	SHEET	HELIX	-95.6751	-5.70243	-170.344	-69.3457	-112.051	146.543	169.444	-73.1628	-1.34783	168.941	Alpha-R	Beta	Alpha-R	116.761	3.58951	3.75934	ASP	MET	3.75934	3.58951
3AJ4	1	B	62	HELIX	N/A	HELIX	-63.4596	154.154	179.933	-64.9845	-129.548	-60.0007	-143.921	-75.6452	-19.097	-177.529	Beta	N/A	Alpha-R	119.428	2.91535	3.98221	GLU	ARG	3.98221	2.91535
3AJ4	1	A	81	SHEET	N/A	SHEET	-104.657	157.221	-175.224	-57.8447	-64.5823	-25.167	176.976	-105.291	122.313	-177.718	Beta	Alpha-R	Beta	113.817	3.67853	2.98833	VAL	ARG	2.98833	3.67853
3AJ4	1	A	97	HELIX	HELIX	HELIX	-57.9887	-49.3586	-178.374	176.236	-64.4804	-39.6152	179.369	-62.2843	-43.0609	177.298	Alpha-R	Alpha-R	Alpha-R	104.93	2.87899	2.94854	ASP	LEU	2.94854	2.87899
3AJ4	1	A	53	SHEET	SHEET	HELIX	-82.0087	130.438	175.133	178.115	-112.389	-11.4622	174.868	-87.4381	-33.9371	-171.667	Beta	N/A	Alpha-R	124.352	3.19825	3.84329	ASP	ILE	3.84329	3.19825
3AYJ	1.1	B	631	HELIX	HELIX	HELIX	-61.6707	-43.5184	179.922	-62.2573	-60.3808	-36.1079	-176.161	-60.8714	-46.1952	176.972	Alpha-R	Alpha-R	Alpha-R	107.53	2.95539	2.94994	LEU	PHE	2.94994	2.95539
3AYJ	1.1	A	378	SHEET	SHEET	SHEET	-163.208	168.573	161.692	68.1321	-96.4468	137.354	172.849	-126.999	149.224	172.551	Beta	Beta	Beta	118.063	4.21091	3.63317	ALA	HIS	3.63317	4.21091
3B64	1.03	A	105	N/A	SHEET	N/A	-148.35	128.188	175.849	-179.149	-102.942	141.609	173.203	-143.835	155.688	174.989	Beta	Beta	Beta	115.09	4.12544	3.72467	HIS	GLY	3.72467	4.12544
3B64	1.03	A	59	SHEET	SHEET	SHEET	-130.775	117.323	176.99	-176.203	-108.937	128.026	178.944	-141.197	144.61	170.514	Beta	Beta	Beta	122.739	4.07238	3.75002	ALA	VAL	3.75002	4.07238
3B64	1.03	A	88	HELIX	HELIX	HELIX	-111.233	-14.58	-177.421	-60.0728	76.3384	10.3496	179.664	-81.2498	-35.8546	-170.98	N/A	Alpha-L	Alpha-R	131.676	3.70132	3.21827	GLU	GLY	3.21827	3.70132
3BVX	1.1	A	497	HELIX	HELIX	HELIX	-62.7313	-44.0612	178.333	-68.7284	-57.2262	-44.5519	-177.743	-63.1015	-44.2835	176.884	Alpha-R	Alpha-R	Alpha-R	100.725	2.92554	2.85883	ALA	GLN	2.85883	2.92554
3C6X	1.05	A	113	N/A	N/A	N/A	-49.9977	143.524	174.386	-68.7762	-52.444	-27.0449	178.04	-122.732	169.718	174.008	Beta	Alpha-R	Beta	115.005	2.93089	2.7938	HIS	PRO	2.7938	2.93089
3C6X	1.05	A	161	N/A	HELIX	N/A	-76.9808	157.476	-178.041	-66.1805	-80.3446	8.20573	160.425	-110.989	11.1572	178.844	Beta	Alpha-R	N/A	71.5326	3.19055	3.1082	LEU	GLY	3.1082	3.19055
3C6X	1.05	A	81	HELIX	HELIX	SHEET	-76.8613	-5.70403	177.683	-64.2539	-60.9689	-19.506	173.271	49.6414	-114.514	-176.024	Alpha-R	Alpha-R	PPII-R	119.663	3.12642	2.96549	SER	GLY	2.96549	3.12642
3C6X	1.05	A	13	N/A	N/A	N/A	72.9638	0.440866	-179.183	-55.925	-113.195	-170.75	-179.812	-57.7004	146.084	176.628	Alpha-L	Beta	Beta	91.0451	3.22617	3.83592	ILE	HIS	3.83592	3.22617
3C6X	1.05	A	94	HELIX	N/A	HELIX	-53.3664	-36.2752	-175.252	71.5183	-68.2559	-16.4847	-177.747	-127.534	40.8061	-177.704	Alpha-R	Alpha-R	N/A	123.965	2.74977	3.03449	TYR	GLU	3.03449	2.74977
3CIJ	1.07	A	155	HELIX	HELIX	HELIX	-58.2878	-33.6495	-179.924	-165.481	-70.0729	-48.9713	177.459	-51.1998	-37.2688	-178.694	Alpha-R	Alpha-R	Alpha-R	95.7524	2.75297	3.0559	PRO	GLY	3.0559	2.75297
3CU9	1.06	A	207	SHEET	SHEET	SHEET	-111.078	132.845	175.085	-174.952	-142.372	126.223	179.884	-130.54	159.286	173.002	Beta	Beta	Beta	124.867	3.7429	4.08072	VAL	ARG	4.08072	3.7429
3CU9	1.06	A	272	SHEET	SHEET	SHEET	-102.579	171.462	175.918	70.5165	-147.7	150.308	-175.501	54.1554	74.3458	-166.953	Beta	Beta	Alpha-L	112.071	3.59517	4.18572	HIS	ALA	4.18572	3.59517
3CU9	1.06	A	89	SHEET	SHEET	SHEET	-147.354	165.81	-171.215	70.9617	-130.257	116.962	-170.555	-118.832	139.419	169.025	Beta	Beta	Beta	126.298	4.15124	4.01315	ILE	PHE	4.01315	4.15124
3CUZ	1.04	A	438	N/A	SHEET	N/A	-126.944	97.8145	-156.151	-160.59	-122.139	118.727	170.029	-96.8935	4.50701	179.537	Beta	Beta	Alpha-R	130.808	3.93714	3.85138	GLY	VAL	3.85138	3.93714
3CUZ	1.04	A	274	N/A	N/A	SHEET	-74.2558	166.926	151.605	-139.944	-156.236	-179.458	179.815	-124.91	140.064	168.873	Beta	Beta	Beta	99.0995	3.26667	4.0792	ASN	GLY	4.0792	3.26667
3CUZ	1.04	A	319	HELIX	HELIX	HELIX	-57.2345	-50.6608	-173.833	-73.0431	-68.0287	-29.9409	172.861	-68.9625	-46.9401	177.226	Alpha-R	Alpha-R	Alpha-R	107.976	2.87448	2.97312	THR	HIS	2.97312	2.87448
3CUZ	1.04	A	409	N/A	N/A	N/A	-83.4479	162.104	175.041	61.9467	-69.143	157.549	175.834	-68.4649	142.427	-175.763	Beta	Beta	Beta	90.8673	3.31049	3.16246	PRO	ASP	3.16246	3.31049
3CUZ	1.04	A	165	SHEET	SHEET	SHEET	-102.231	120.003	171.305	175.115	-90.4257	122.563	179.086	-130.35	138.051	-175.929	Beta	Beta	Beta	128.111	3.6262	3.48707	ILE	ARG	3.48707	3.6262
3D1P	0.98	A	98	N/A	N/A	SHEET	-134.342	-124.15	175.913	58.1649	-98.6936	-62.5156	-179.571	-162.927	166.116	175.17	Beta	Alpha-R	Beta	91.1706	4.05595	3.65681	TYR	ALA	3.65681	4.05595
3DHA	0.95	A	18	SHEET	SHEET	SHEET	-151.946	132.585	172.62	-171.041	-93.9833	39.7202	140.619	-141.853	172.903	-179.49	Beta	N/A	Beta	113.76	4.11478	3.48614	ARG	MET	3.48614	4.11478
3DHA	0.95	A	247	N/A	N/A	N/A	-70.8997	144.257	166.017	-69.3498	-86.1193	124.072	-174.892	-115.772	-0.627711	176.829	Beta	Beta	N/A	123.117	2.98916	3.46007	SER	ARG	3.46007	2.98916
3DHA	0.95	A	41	SHEET	SHEET	SHEET	-118.939	157.752	175.161	-66.5245	-130.644	138.485	176.803	-117.891	146.717	158.546	Beta	Beta	Beta	123.448	4.01354	3.9573	TRP	TYR	3.9573	4.01354
3DHA	0.95	A	145	HELIX	HELIX	HELIX	-94.9545	-0.996781	-175.918	-61.134	-143.382	43.6694	178.055	-57.099	-24.3559	-176.103	Alpha-R	N/A	Alpha-R	145.848	3.52155	4.10676	GLU	ILE	4.10676	3.52155
3DK9	0.95	A	234	HELIX	HELIX	HELIX	-63.3916	-40.6009	178.004	-175.767	-61.5842	-46.7717	-179.653	-62.4018	-41.4909	-177.609	Alpha-R	Alpha-R	Alpha-R	98.5834	2.9424	2.94069	ASN	THR	2.94069	2.9424
3DK9	0.95	A	440	HELIX	HELIX	HELIX	-66.8991	-25.3542	176.369	-70.2156	-57.9812	-40.7927	-178.025	87.6068	-10.034	-171.359	Alpha-R	Alpha-R	Alpha-L	107.826	2.92934	2.98148	GLY	ASP	2.98148	2.92934
3DK9	0.95	A	423	SHEET	SHEET	SHEET	-116.304	140.683	-179.326	-62.1324	-119.842	143.896	173.43	-106.635	120.766	-175.543	Beta	Beta	Beta	119.632	3.8751	3.90536	VAL	ALA	3.90536	3.8751
3DK9	0.95	A	333	HELIX	HELIX	HELIX	-94.6632	-7.99788	170.482	-61.6952	80.6099	7.81634	-174.03	-63.7433	-17.9956	177.89	Alpha-R	Alpha-L	Alpha-R	125.126	3.5634	3.22308	VAL	GLY	3.22308	3.5634
3DK9	0.95	A	284	SHEET	SHEET	N/A	-129.847	116.654	169.893	178.43	-109.299	118.93	-173.499	-84.3616	-40.1689	-176.747	Beta	Beta	Alpha-R	129.385	3.94648	3.7476	ASP	LEU	3.7476	3.94648
3DK9	0.95	A	417	SHEET	SHEET	N/A	-124.44	128.416	174.62	179.102	-120.654	142.204	179.124	-104.372	165.076	166.305	Beta	Beta	Beta	119.006	3.96333	3.9146	LYS	VAL	3.9146	3.96333
3E2O	1.06	A	128	N/A	N/A	N/A	-88.6783	172.561	168.625	71.1028	115.28	6.22528	166.766	-114.46	140.187	173.87	Beta	N/A	Beta	125.678	3.43034	3.77287	ARG	GLY	3.77287	3.43034
3E4G	0.96	A	33	HELIX	N/A	HELIX	-92.5209	14.4344	174.923	-69.4867	79.3896	21.452	171.821	-65.347	-25.9971	178.899	Alpha-R	Alpha-L	Alpha-R	116.619	3.55885	3.24604	ARG	GLY	3.24604	3.55885
3E4G	0.96	A	94	N/A	N/A	N/A	-99.7812	91.246	-167.763	-67.6527	-71.1226	-15.6317	-177.965	54.1904	45.8833	172.793	Beta	Alpha-R	Alpha-L	123.681	3.62447	3.06356	LYS	HIS	3.06356	3.62447
3E4G	0.96	A	123	N/A	N/A	N/A	-108.57	94.7008	-162.554	-65.27	-64.6612	-22.8862	-179.508	54.7008	42.6173	171.216	Beta	Alpha-R	Alpha-L	121.637	3.73659	2.97735	SER	GLY	2.97735	3.73659
3E4G	0.96	A	101	HELIX	HELIX	HELIX	-66.0716	-46.2307	-179.665	-57.2228	-65.9026	-38.7248	175.271	-63.5019	-29.1331	177.109	Alpha-R	Alpha-R	Alpha-R	103.578	3.03971	3.05123	GLY	LEU	3.05123	3.03971
3E4G	0.96	A	71	N/A	N/A	N/A	-98.8327	17.4038	176.462	68.0521	-62.387	146.625	178.041	-115.179	153.934	177.464	Alpha-R	Beta	Beta	96.8884	3.58603	2.88281	SER	ILE	2.88281	3.58603
3E4G	0.96	A	92	SHEET	N/A	SHEET	-134.615	123.987	177.606	177.552	54.1904	45.8833	172.793	-118.911	111.764	-175.389	Beta	Alpha-L	Beta	101.014	4.00264	2.75698	LEU	LYS	2.75698	4.00264
3E8M	1.1	A	88	HELIX	HELIX	HELIX	-59.5235	-39.5277	178.729	-75.089	-60.2427	-64.7595	164.764	-65.1137	-48.182	-179.219	Alpha-R	Alpha-R	Alpha-R	106.489	2.86623	2.9132	LEU	ASN	2.9132	2.86623
3EA6	0.92	A	73	N/A	N/A	N/A	44.1804	86.8713	-160.181	-56.4586	25.9567	46.9165	-173.16	-75.7085	160.434	162.746	N/A	N/A	Beta	134.936	2.78238	2.78495	GLN	ASN	2.78495	2.78238
3EUN	1.05	A	40	N/A	N/A	N/A	67.5029	4.59395	179.736	-74.9376	-60.7188	133.12	-176.588	56.1326	28.9235	-177.723	Alpha-L	Beta	Alpha-L	106.097	3.28069	2.81563	GLU	VAL	2.81563	3.28069
3EUN	1.05	A	14	HELIX	HELIX	N/A	-75.5913	-26.8715	-168.3	54.735	-58.8263	-48.1196	-177.995	-72.5099	-28.9171	-177.882	Alpha-R	Alpha-R	Alpha-R	100.144	3.09634	2.78389	VAL	GLU	2.78389	3.09634
3EUN	1.05	A	49	HELIX	HELIX	HELIX	-68.3843	-40.5536	179.962	56.9438	-59.5327	-37.6407	-175.693	-79.2508	-30.5016	178.891	Alpha-R	Alpha-R	Alpha-R	107.518	2.96721	2.82046	GLN	VAL	2.82046	2.96721
3EUN	1.05	A	11	N/A	N/A	N/A	-92.383	-12.4623	176.266	75.2422	82.1182	-11.3767	-163.614	56.8425	46.8981	-172.491	Alpha-R	Alpha-L	Alpha-L	144.37	3.41481	3.36073	ASN	ASP	3.36073	3.41481
3EUN	1.05	A	8	N/A	N/A	N/A	-54.8573	135.822	178.119	174.674	-104.415	15.4221	170.674	-76.1522	-10.0387	179.05	Beta	Alpha-R	Alpha-R	142.873	2.81458	3.71077	GLU	ILE	3.71077	2.81458
3EUN	1.05	A	37	HELIX	N/A	HELIX	-93.6339	112.096	175.957	179.156	-95.2162	7.05522	-168.939	-104.746	-8.4151	-176.988	Beta	Alpha-R	Alpha-R	144.008	3.38415	3.62029	LEU	THR	3.62029	3.38415
3EUN	1.05	A	18	HELIX	N/A	HELIX	-83.3082	122.391	-177.995	179.26	-66.887	-20.609	-173.967	-83.0663	-14.3789	-172.437	Beta	Alpha-R	Alpha-R	121.239	3.14257	2.93526	GLU	PRO	2.93526	3.14257
3EUN	1.05	A	53	HELIX	N/A	HELIX	-68.4167	130.659	-174.927	179.637	-78.6377	-13.5434	-171.038	-101.065	-12.8241	-172.439	Beta	Alpha-R	Alpha-R	122.555	2.83888	3.15873	VAL	PRO	3.15873	2.83888
3EY6	1.05	A	138	SHEET	SHEET	SHEET	-121.483	110.991	-176.246	-168.99	-104.23	126.319	168.693	-125.668	157.498	172.201	Beta	Beta	Beta	144.544	3.9447	3.66296	LEU	LEU	3.66296	3.9447
3EY6	1.05	A	121	N/A	N/A	HELIX	-117.758	-112.933	-176.986	-59.8972	-102.833	2.8073	169.307	-109.042	6.77383	179.994	N/A	Alpha-R	Alpha-R	134.036	3.85779	3.63409	TYR	TYR	3.63409	3.85779
3EY6	1.05	A	93	N/A	N/A	N/A	-70.3016	-24.8801	-176.295	-53.1731	-93.4692	2.35405	170.998	-51.3085	134.692	-167.803	Alpha-R	Alpha-R	Beta	133.548	3.02745	3.48421	ASP	ASP	3.48421	3.02745
3F1L	0.95	B	79	HELIX	HELIX	HELIX	-67.2902	-40.9217	178.028	-66.9685	-63.8662	-41.7776	179.132	-58.0179	-41.8814	179.799	Alpha-R	Alpha-R	Alpha-R	102.775	3.02957	3.00296	ASN	GLN	3.00296	3.02957
3F1L	0.95	A	191	SHEET	SHEET	SHEET	-119.956	152.382	168.757	-64.306	-118.532	128.838	165.3	-146.948	168.745	173.494	Beta	Beta	Beta	125.82	3.92017	3.93663	ASN	ILE	3.93663	3.92017
3F1L	0.95	B	74	N/A	HELIX	N/A	-64.5372	147.359	173.885	65.6461	-98.4343	170.575	175.872	-115.807	-20.0863	-170.836	Beta	Beta	N/A	96.8753	2.86987	3.61184	THR	THR	3.61184	2.86987
3F1L	0.95	A	107	N/A	HELIX	N/A	-173.227	168.545	-175.921	66.2299	-63.4465	158.281	179.542	-109.461	97.6038	-173.444	Beta	Beta	Beta	86.9434	4.27024	2.88782	VAL	PRO	2.88782	4.27024
3FSA	0.98	A	112	N/A	N/A	SHEET	-94.6056	127.417	179.402	176.373	-72.3443	-26.1333	176.207	-161.595	164.693	169.964	Beta	Alpha-R	Beta	115.643	3.58721	3.12003	PHE	ALA	3.12003	3.58721
3G21	0.9	A	192	HELIX	HELIX	HELIX	-69.6925	-33.3683	170.699	-70.5038	-55.4663	-46.0432	-176.779	-61.0286	-41.1341	179.632	Alpha-R	Alpha-R	Alpha-R	101.854	3.0335	2.84592	ASP	PHE	2.84592	3.0335
3G46	0.91	A	92	HELIX	HELIX	HELIX	-69.7153	-31.1642	177.036	77.3084	-78.8242	-36.822	172.245	-64.595	-39.2067	-175.132	Alpha-R	Alpha-R	Alpha-R	102.309	2.91881	3.16243	VAL	VAL	3.16243	2.91881
3G5S	1.05	A	51	N/A	N/A	N/A	-137.169	-121.733	179.628	-159.696	-56.802	148.606	178.342	-87.2842	-14.9997	-177.138	Beta	Beta	Alpha-R	88.4592	4.00629	2.85161	VAL	SER	2.85161	4.00629
3G5S	1.05	A	189	SHEET	SHEET	SHEET	-107.843	96.8778	-177.482	-56.8913	-74.7502	-30.1182	24.1709	-116.603	127.541	178.873	Beta	Alpha-R	Beta	101.019	3.71789	3.1483	ASN	PRO	3.1483	3.71789
3G5S	1.05	A	174	HELIX	SHEET	HELIX	-131.169	166.084	169.817	-38.5597	-139.002	140.569	177.743	-113.336	13.6906	178.152	Beta	Beta	N/A	119.127	4.00266	4.10215	LYS	PHE	4.10215	4.00266
3G5S	1.05	A	223	N/A	N/A	N/A	-93.6514	106.329	-173.151	176.929	-109.779	129.255	179.236	-92.7948	-6.69922	175.174	Beta	Beta	Alpha-R	123.853	3.5103	3.68528	ALA	VAL	3.68528	3.5103
3GOE	0.97	A	39	HELIX	HELIX	HELIX	-64.2541	-42.5004	177.908	-71.3221	-69.4423	-31.152	-179.031	-51.9259	-48.0958	-175.635	Alpha-R	Alpha-R	Alpha-R	107.337	2.9311	3.0384	TYR	THR	3.0384	2.9311
3H31	1	A	35	HELIX	HELIX	HELIX	-58.6432	-36.8622	-178.577	-62.4996	-62.5532	-19.6715	175.132	-135.01	168.89	176.071	Alpha-R	Alpha-R	Beta	123	2.75754	2.90404	THR	ALA	2.90404	2.75754
3H31	1	A	66	N/A	N/A	N/A	-141.59	165.756	-174.416	82.8361	-71.5454	-9.08503	174.756	-164.905	152.61	161.318	Beta	Alpha-R	Beta	126.275	4.18188	3.05346	TYR	THR	3.05346	4.18188
3H31	1	A	53	SHEET	N/A	SHEET	-143.004	142.868	178.085	174.982	-72.6329	-19.6309	-173.993	-143.766	179.959	-174.737	Beta	Alpha-R	Beta	122.24	4.08986	3.1887	GLY	GLN	3.1887	4.08986
3H31	1	A	38	HELIX	N/A	HELIX	-103.034	141.197	177.657	178.757	-55.4783	-31.2521	-167.123	-114.077	25.6342	175.716	Beta	Alpha-R	N/A	120.583	3.72703	2.95552	ASN	GLN	2.95552	3.72703
3I94	1.04	A	1162	N/A	N/A	N/A	-60.4476	138.107	171.048	-172.371	-102.068	136.09	172.053	-93.6959	2.79825	-177.303	Beta	Beta	Alpha-R	118.689	2.85381	3.62752	TYR	LEU	3.62752	2.85381
3I94	1.04	A	1064	N/A	N/A	N/A	-150.289	133.284	-175.446	-157.179	-136.529	176.553	171.641	-130.873	135.428	-178.745	Beta	Beta	Beta	106.336	4.08967	4.0701	ARG	TYR	4.0701	4.08967
3I94	1.04	A	1213	N/A	HELIX	HELIX	-64.7335	-40.9708	179.012	-75.6069	-61.4741	-39.8849	-179.999	-55.9462	-49.5162	-178.304	Alpha-R	Alpha-R	Alpha-R	103.697	2.96224	2.92332	TYR	GLN	2.92332	2.96224
3I94	1.04	A	1188	N/A	HELIX	HELIX	-61.2971	-39.7526	177.568	-69.6869	-65.7506	-46.7255	-178.738	-64.3543	-47.7862	178.49	Alpha-R	Alpha-R	Alpha-R	97.1182	2.9033	2.97562	HIS	HIS	2.97562	2.9033
3I94	1.04	A	1104	N/A	N/A	N/A	-150.502	148.358	177.328	71.1581	-141.376	126.502	177.993	-147.316	152.006	170.736	Beta	Beta	Beta	122.42	4.17269	4.08278	GLY	ASP	4.08278	4.17269
3I94	1.04	A	1089	N/A	N/A	N/A	-146.244	132.984	168.576	179.047	-134.354	135.739	163.543	-122.02	133.102	173.183	Beta	Beta	Beta	122.564	4.0584	4.06724	HIS	VAL	4.06724	4.0584
3IQU	1.05	A	96	HELIX	HELIX	HELIX	-60.0903	-42.3054	179.006	-66.9987	-63.8712	-37.1664	176.444	-64.2541	-45.1855	178.523	Alpha-R	Alpha-R	Alpha-R	105.89	2.8658	2.95024	VAL	ASP	2.95024	2.8658
3JU4	0.98	A	749	SHEET	SHEET	SHEET	-140.144	121.759	171.27	-179.456	-93.5245	117.584	-179.251	-130.091	163.726	176.185	Beta	Beta	Beta	127.436	4.07094	3.52622	TYR	TYR	3.52622	4.07094
3JU4	0.98	A	841	SHEET	N/A	SHEET	-140.429	139.131	174.13	-169.279	-83.2436	-0.785538	173.638	-100.962	132.07	-172.307	Beta	Alpha-R	Beta	134.014	4.05447	3.406	PHE	GLY	3.406	4.05447
3JU4	0.98	A	583	SHEET	SHEET	SHEET	-97.5319	132.19	-177.055	-66.5186	-130.071	139.375	171.277	-73.1418	142.394	167.795	Beta	Beta	Beta	123.102	3.63555	3.99268	PRO	ILE	3.99268	3.63555
3JU4	0.98	A	416	SHEET	SHEET	SHEET	-119.667	132.73	174.09	-61.6205	-136.207	138.669	171.355	-161.577	147.075	168.279	Beta	Beta	Beta	120.307	3.98873	4.05211	ASN	ALA	4.05211	3.98873
3JU4	0.98	A	395	SHEET	N/A	SHEET	-138.941	125.289	177.523	177.099	44.7386	53.316	171.885	-123.826	137.42	173.327	Beta	Alpha-L	Beta	97.8751	4.09097	2.79412	VAL	ARG	2.79412	4.09097
3JU4	0.98	A	389	N/A	N/A	SHEET	-155.79	129.866	172.592	179.822	-125.875	7.54432	-179.177	-163.092	146.388	178.322	Beta	N/A	Beta	135.568	4.12248	4.04547	HIS	MET	4.04547	4.12248
3JUD	0.98	A	84	N/A	N/A	N/A	-75.9908	148.693	-3.57947	-65.1321	-94.9924	8.21238	-174.131	57.0447	37.421	179.418	Beta	Alpha-R	Alpha-L	163.841	3.08395	4.51651	SER	PRO	4.51651	3.08395
3JUD	0.98	A	116	SHEET	SHEET	SHEET	-138.532	157.403	160.194	-59.6378	-79.2245	156.574	175.95	-81.5145	133.546	-178.015	Beta	Beta	Beta	100.81	4.10578	3.31228	GLN	PHE	3.31228	4.10578
3JYO	1	A	246	N/A	N/A	N/A	-67.7874	145.119	165.113	-55.9363	-66.6757	144.231	-175.063	97.9936	10.8698	179.096	Beta	Beta	Alpha-L	101.728	3.11301	3.06975	GLY	GLU	3.06975	3.11301
3JYO	1	A	218	HELIX	HELIX	HELIX	-76.8525	-13.4551	178.126	74.479	-72.5529	151.136	169.442	-58.2957	-17.8603	178.521	Alpha-R	Beta	Alpha-R	95.7613	3.17572	3.18611	SER	LEU	3.18611	3.17572
3K34	0.9	A	206	N/A	SHEET	N/A	-124.799	1.22913	-160.93	-32.0567	-106.939	131.703	160.158	-90.5176	71.2193	-171.427	N/A	Beta	Beta	126.447	3.89351	3.57599	GLU	VAL	3.57599	3.89351
3KFF	0.96	A	138	HELIX	HELIX	HELIX	-60.3214	-46.4101	179.068	-72.8055	-60.9476	-33.3964	177.093	-65.8747	-37.4421	172.68	Alpha-R	Alpha-R	Alpha-R	107.36	2.93305	2.91882	LEU	GLU	2.91882	2.93305
3KWD	1.1	A	116	N/A	SHEET	N/A	-68.8917	148.011	167.907	-73.8115	-109.487	125.309	175.539	79.3474	2.29661	178.896	Beta	Beta	Alpha-L	124.445	3.02779	3.81326	GLY	PHE	3.81326	3.02779
3KWD	1.1	A	133	N/A	SHEET	N/A	-73.5106	149.904	172	-71.375	-118.963	103.171	179.307	76.7887	12.5986	173.1	Beta	Beta	Alpha-L	137.751	3.18494	3.90906	GLY	VAL	3.90906	3.18494
3L8W	1	A	103	SHEET	SHEET	SHEET	-100.019	128.789	-177.963	-58.1227	-97.5178	144.961	-176.859	-107.663	121.049	178.118	Beta	Beta	Beta	110.903	3.63885	3.58522	VAL	HIS	3.58522	3.63885
3L8W	1	A	290	SHEET	SHEET	SHEET	-160.068	154.556	175.108	66.1895	-119.424	121.843	-176.261	-130.473	146.106	164.595	Beta	Beta	Beta	124.65	4.16827	3.96313	LYS	THR	3.96313	4.16827
3L8W	1	A	35	SHEET	SHEET	SHEET	-127.611	133.726	173.365	178.826	-128.162	121.059	173.253	-121.603	142.26	168.113	Beta	Beta	Beta	128.869	4.03343	4.03304	VAL	VAL	4.03304	4.03343
3LB2	1.06	A	73	N/A	N/A	N/A	72.8148	11.4701	178.755	-60.3341	-105.295	111.553	-176.184	46.0388	45.693	175.857	Alpha-L	Beta	Alpha-L	134.484	3.17953	3.66568	ASP	VAL	3.66568	3.17953
3LO8	1.05	A	274	SHEET	SHEET	SHEET	-149.605	143.609	178.452	-170.024	138.95	-164.991	178.847	-131.103	131.63	179.442	Beta	N/A	Beta	111.135	4.09797	4.13593	PHE	GLY	4.13593	4.09797
3LO8	1.05	A	134	HELIX	HELIX	HELIX	-73.5216	-38.2216	-176.661	-159.303	-66.0356	-41.2694	175.426	-68.5544	-57.6793	-167.652	Alpha-R	Alpha-R	Alpha-R	100.951	3.01481	2.94221	VAL	SER	2.94221	3.01481
3LO8	1.05	A	112	SHEET	SHEET	SHEET	-120.874	101.72	-162.339	178.935	-116.672	122.734	174.441	-121.814	152.445	177.47	Beta	Beta	Beta	129.739	3.94648	3.79529	LEU	VAL	3.79529	3.94648
3MCW	1.06	B	40	HELIX	HELIX	HELIX	-62.5404	-40.8467	178.828	-69.1289	-62.5322	-36.5417	178.036	-64.6107	-45.3947	177.193	Alpha-R	Alpha-R	Alpha-R	105.773	2.96917	2.95984	ALA	ALA	2.95984	2.96917
3MCW	1.06	B	147	SHEET	SHEET	SHEET	-118.26	152.451	171.524	-63.5934	-148.635	163.544	176.087	-96.0407	13.2323	177.891	Beta	Beta	Alpha-R	114.492	3.86156	4.12969	GLY	PHE	4.12969	3.86156
3MCW	1.06	B	181	SHEET	HELIX	SHEET	-139.188	169.903	167.464	-54.0929	-104.297	152.404	178.817	-81.4212	127.61	-169.855	Beta	Beta	Beta	111.492	4.11651	3.70393	VAL	GLY	3.70393	4.11651
3MCW	1.06	A	178	N/A	SHEET	N/A	-164.949	174.082	166.792	70.4447	-102.781	118.681	175.705	-123.439	-24.7331	-172.513	Beta	Beta	N/A	131.779	4.22313	3.75317	TYR	ARG	3.75317	4.22313
3MCW	1.06	A	141	SHEET	SHEET	SHEET	-105.761	118.55	179.143	177.768	-98.4645	114.13	-178.777	-112.395	128.813	169.014	Beta	Beta	Beta	131.793	3.79871	3.53759	VAL	LEU	3.53759	3.79871
3NE0	1	A	1121	N/A	HELIX	HELIX	-59.6197	-54.3123	-177.353	49.9466	-71.752	-30.3143	176.866	-100.393	-175.694	-171.609	Alpha-R	Alpha-R	Beta	110.518	2.87318	3.10704	ASP	SER	3.10704	2.87318
3NOQ	1	A	67	SHEET	SHEET	SHEET	-134.047	123.845	177.204	-174.407	-102.938	113.943	171.481	-108.371	138.637	179.663	Beta	Beta	Beta	135.36	3.97377	3.67297	ILE	ILE	3.67297	3.97377
3NOQ	1	B	69	SHEET	SHEET	SHEET	-127.232	126.659	177.268	-174.344	-105.08	115.73	170.602	-116.082	126.011	-177.195	Beta	Beta	Beta	134.651	4.0802	3.67837	ILE	ILE	3.67837	4.0802
3NOQ	1	A	60	N/A	N/A	N/A	-66.5428	133.377	176.729	-174.315	-71.5278	22.6747	152.821	-85.4734	-5.89972	179.544	Beta	Alpha-R	Alpha-R	86.2961	2.96853	2.97321	ASP	PRO	2.97321	2.96853
3NOQ	1	B	62	N/A	N/A	N/A	-69.3008	135.58	177.475	-174.013	-76.1564	167.449	176.502	-93.5266	-2.89844	-177.946	Beta	Beta	Alpha-R	76.7106	2.94604	3.06866	ASP	PRO	3.06866	2.94604
3NVS	1.02	A	73	SHEET	SHEET	N/A	-143.886	126.49	175.647	-173.94	-105.806	118.284	-177.715	-114.991	125.056	-173.123	Beta	Beta	Beta	130.377	4.08206	3.71268	THR	GLU	3.71268	4.08206
3NVS	1.02	A	391	HELIX	HELIX	HELIX	-60.9501	-43.5626	-175.483	-74.6644	-77.9904	-13.4697	172.446	-67.5235	-43.861	179.025	Alpha-R	Alpha-R	Alpha-R	119.958	2.87409	3.21487	MET	PHE	3.21487	2.87409
3NVS	1.02	A	107	N/A	N/A	HELIX	-71.9337	-22.9672	-171.869	-64.6706	-70.2155	-28.3908	-168.744	-69.3944	-16.6725	174.05	Alpha-R	Alpha-R	Alpha-R	116.893	3.11139	3.18926	LEU	LEU	3.18926	3.11139
3NVS	1.02	A	409	HELIX	HELIX	HELIX	-61.8122	-15.587	175.173	73.0792	-60.5318	-17.1762	-178.274	-67.9859	-9.43499	176.287	Alpha-R	Alpha-R	Alpha-R	122.26	2.94643	2.96232	LYS	THR	2.96232	2.94643
3NYC	1.06	A	1203	N/A	HELIX	HELIX	-59.5581	-38.764	178.774	-75.8766	-71.0659	-29.4697	174.322	-94.5871	9.83277	-177.178	Alpha-R	Alpha-R	Alpha-R	107.867	2.78227	3.03655	TRP	ASP	3.03655	2.78227
3NYC	1.06	A	1122	N/A	HELIX	HELIX	-68.1895	-27.8291	175.118	-71.6875	-65.5859	-37.0941	-176.84	-59.5007	-46.0828	-177.7	Alpha-R	Alpha-R	Alpha-R	107.432	3.06061	2.92737	ALA	SER	2.92737	3.06061
3NYC	1.06	A	1167	N/A	N/A	N/A	-83.3021	169.379	-173.554	-71.3976	56.3217	35.2399	-179.639	-110.827	105.649	172.542	Beta	Alpha-L	Beta	110.407	3.3632	2.89621	LEU	ASN	2.89621	3.3632
3NYC	1.06	A	1185	N/A	N/A	N/A	-103.678	174.784	-170.195	-55.4227	-69.6588	-18.7679	-178.107	-94.0312	122.068	166.261	Beta	Alpha-R	Beta	118.507	3.7829	2.96331	ARG	ASP	2.96331	3.7829
3NYC	1.06	A	1235	N/A	N/A	N/A	-99.467	9.48664	-166.737	50.8807	-71.1886	-18.0589	179.698	-98.8477	95.9191	-173.941	Alpha-R	Alpha-R	Beta	113.283	3.62627	2.80445	ASP	HIS	2.80445	3.62627
3NYC	1.06	A	1077	N/A	N/A	N/A	-152.403	172.711	-170.335	60.3192	-95.2177	-23.792	-169.091	-63.2328	-44.0432	-179.34	Beta	Alpha-R	Alpha-R	116.191	4.1681	3.37836	PHE	GLU	3.37836	4.1681
3PB6	1.05	X	369	HELIX	HELIX	HELIX	-57.7398	-43.8468	178.6	-162.63	-64.5357	-43.4556	177.32	-62.4908	-41.7732	177.616	Alpha-R	Alpha-R	Alpha-R	100.395	2.88744	3.01386	LEU	ARG	3.01386	2.88744
3PB6	1.05	X	191	HELIX	HELIX	HELIX	-60.5679	-47.0554	-177.417	-71.2327	-64.4083	-36.9734	177.6	-48.9344	-46.7978	-178.248	Alpha-R	Alpha-R	Alpha-R	106.597	2.86909	2.97976	PRO	ALA	2.97976	2.86909
3PB6	1.05	X	167	SHEET	SHEET	SHEET	-163.362	173.62	174.381	61.6441	-109.617	141.009	-178.707	-139.055	158.307	173.787	Beta	Beta	Beta	119.689	4.2637	3.73253	ALA	HIS	3.73253	4.2637
3QL9	0.93	A	280	HELIX	HELIX	HELIX	-62.2861	-43.9958	178.755	-178.207	-57.4235	-41.5947	-177.62	-62.2485	-40.9306	177.675	Alpha-R	Alpha-R	Alpha-R	102.849	2.90376	2.78538	ALA	ASN	2.78538	2.90376
3QL9	0.93	A	232	N/A	N/A	SHEET	-62.7185	146.108	173.851	-175.028	-76.3591	-12.5017	-167.406	-82.5068	143.171	164.947	Beta	Alpha-R	Beta	124.246	2.89659	3.19368	CYS	ASP	3.19368	2.89659
3QL9	0.93	A	243	HELIX	HELIX	HELIX	-67.8813	-37.7553	178.706	-76.3793	-64.1454	-46.7409	-179.06	-62.6193	-44.6909	-179.085	Alpha-R	Alpha-R	Alpha-R	97.2907	2.97274	2.88147	LYS	ILE	2.88147	2.97274
3QL9	0.93	A	200	HELIX	HELIX	HELIX	-65.8186	-36.5499	-177.799	-75.848	-64.9371	-44.3364	177.664	-65.9258	-42.3348	177.305	Alpha-R	Alpha-R	Alpha-R	99.3301	2.9192	2.92671	ASN	PHE	2.92671	2.9192
3QL9	0.93	A	268	N/A	N/A	N/A	-67.9066	-47.0809	-175.437	-71.0895	-128.243	92.3434	-171.268	-72.6133	-46.3166	-179.032	Alpha-R	Beta	Alpha-R	143.632	3.01721	3.90325	ILE	HIS	3.90325	3.01721
3QL9	0.93	A	231	SHEET	N/A	SHEET	-82.5068	143.171	164.947	-62.2387	-62.7185	146.108	173.851	-114.484	125.973	-179.517	Beta	Beta	Beta	99.4629	3.23683	2.89659	ILE	CYS	2.89659	3.23683
3QL9	0.93	A	223	N/A	N/A	N/A	-104.402	-4.30129	179.806	62.8917	64.2956	22.5862	178.866	-72.8801	-55.0817	-173.498	Alpha-R	Alpha-L	Alpha-R	124.271	3.58402	3.07345	TRP	ALA	3.07345	3.58402
3QL9	0.93	A	174	N/A	N/A	N/A	-127.61	-11.4943	177.62	68.5772	80.8991	-4.82077	-178.728	-91.3857	-26.9185	-179.461	N/A	Alpha-L	Alpha-R	138.734	3.88809	3.25408	ALA	GLY	3.25408	3.88809
3QL9	0.93	A	197	SHEET	HELIX	SHEET	-68.6808	158.351	-179.949	75.0547	-48.9056	-48.8842	-173.752	-129.591	130.559	177.286	Beta	Alpha-R	Beta	101.85	2.9619	2.70512	ILE	LYS	2.70512	2.9619
3QL9	0.93	A	235	N/A	N/A	N/A	-148.908	179.961	-175.41	77.3423	-76.8007	-10.0247	-174.107	-128.819	-6.04868	179.854	Beta	Alpha-R	N/A	129.006	4.04558	3.18113	PHE	HIS	3.18113	4.04558
3QL9	0.93	A	240	SHEET	HELIX	SHEET	-79.8824	152.048	179.442	78.4232	-60.0181	-33.9018	-178.354	-133.253	134.903	178.682	Beta	Alpha-R	Beta	107.268	3.11655	2.85514	PHE	LYS	2.85514	3.11655
3QL9	0.93	A	265	N/A	N/A	N/A	-69.0895	177.835	-175.078	78.4488	-69.4589	-19.51	171.674	-90.5054	119.261	-175.823	Beta	Alpha-R	Beta	121.795	3.00179	3.00732	TYR	TYR	3.00732	3.00179
3QL9	0.93	A	220	N/A	N/A	N/A	-61.0686	131.474	179.717	173.276	-64.2315	-29.3735	-175.798	-131.557	155.975	176.208	Beta	Alpha-R	Beta	113.506	2.97371	2.89745	GLN	ARG	2.89745	2.97371
3QL9	0.93	A	171	N/A	N/A	N/A	-65.8518	135.11	179.07	177.013	-75.8221	-19.3943	-177.742	-117.71	144.502	174.292	Beta	Alpha-R	Beta	118.467	2.96828	3.11035	SER	THR	3.11035	2.96828
3QR7	0.94	A	159	N/A	N/A	N/A	-105.677	121.129	-169.756	-56.1217	-77.0518	-17.1136	-176.683	-115.845	122.714	168.827	Beta	Alpha-R	Beta	122.224	3.73179	3.11825	VAL	THR	3.11825	3.73179
3QZB	1.1	A	115	SHEET	N/A	SHEET	-98.3336	142.169	-178.325	175.008	-63.9115	-18.3574	177.342	-137.001	125.219	170.81	Beta	Alpha-R	Beta	119.183	3.66502	3.00537	TYR	ASN	3.00537	3.66502
3QZR	1.04	A	147	N/A	N/A	N/A	-66.6834	142.069	-170.937	-72.5053	91.2569	-12.177	179.585	-98.4835	1.4299	178.215	Beta	Alpha-L	Alpha-R	142.535	2.99903	3.57583	GLN	GLY	3.57583	2.99903
3QZR	1.04	B	171	SHEET	SHEET	SHEET	-121.853	151.927	162.581	64.5786	-75.4645	126.205	178.574	-136.64	140.294	174.003	Beta	Beta	Beta	118.264	3.90876	3.31385	PHE	ALA	3.31385	3.90876
3R2Q	1.05	A	160	HELIX	HELIX	HELIX	-61.4718	-41.6852	179.388	-72.4223	-62.4452	-47.831	-179.402	-67.8227	-35.1689	173.126	Alpha-R	Alpha-R	Alpha-R	97.6344	2.93976	2.96062	ALA	ALA	2.96062	2.93976
3R2Q	1.05	A	59	SHEET	SHEET	N/A	-107.896	123.288	-178.357	-67.7586	-107.755	137.919	176.086	-73.7078	133.395	-178.162	Beta	Beta	Beta	119.549	3.70158	3.72679	GLU	TRP	3.72679	3.70158
3R40	1.05	A	216	HELIX	HELIX	HELIX	-61.8401	-41.7626	175.878	-63.6548	-60.2465	-36.9194	176.148	-60.4037	-43.3748	176.328	Alpha-R	Alpha-R	Alpha-R	106.717	2.96143	2.91255	MET	GLU	2.91255	2.96143
3R87	1.05	A	112	SHEET	SHEET	SHEET	-112.457	127.99	-174.031	-49.6909	-123.33	148.011	163.753	-125.114	167.677	175.395	Beta	Beta	Beta	117.015	3.8427	3.91045	VAL	LEU	3.91045	3.8427
3R87	1.05	A	74	SHEET	SHEET	SHEET	-92.5558	160.472	174.321	63.4743	-105.786	121.489	170.512	-104.923	105.292	-178.821	Beta	Beta	Beta	128.641	3.42906	3.73406	ILE	ASP	3.73406	3.42906
3RO3	1.1	A	278	HELIX	HELIX	HELIX	-61.9335	-41.7886	177.758	-72.5821	-64.3689	-42.8448	179.015	-69.375	-36.3385	172.437	Alpha-R	Alpha-R	Alpha-R	99.7532	3.00082	2.9533	SER	TYR	2.9533	3.00082
3RO3	1.1	A	318	HELIX	HELIX	HELIX	-68.2021	-36.5125	173.779	-67.0477	-57.9036	-55.1453	-178.987	-58.3962	-43.2504	-178.218	Alpha-R	Alpha-R	Alpha-R	94.026	2.99967	2.97497	ALA	TRP	2.97497	2.99967
3ROF	1.03	A	138	HELIX	HELIX	HELIX	-65.8969	-52.6595	-178.497	-171.956	-65.9803	-34.5172	178.187	-104.493	-20.5634	-159.165	Alpha-R	Alpha-R	Alpha-R	106.102	2.91584	2.94304	SER	ASP	2.94304	2.91584
3ROF	1.03	A	13	HELIX	HELIX	N/A	-111.542	-73.105	-168.049	-61.249	-74.0599	-55.7418	-175.102	-125.337	-27.166	-175.368	N/A	Alpha-R	N/A	93.6833	3.67894	3.12281	ILE	ARG	3.12281	3.67894
3ROF	1.03	A	8	SHEET	N/A	SHEET	-130.032	-159.001	-179.145	60.2748	-86.0369	-56.5604	-172.904	-136.215	128.121	176.231	Beta	Alpha-R	Beta	93.2837	4.02608	3.34881	VAL	LEU	3.34881	4.02608
3RPE	1.1	A	168	SHEET	N/A	SHEET	-106.841	135.208	-176.938	-62.1532	-121.292	161.186	-179.97	-138.759	136.351	170.153	Beta	Beta	Beta	108.785	3.78463	3.89907	MET	ASN	3.89907	3.78463
3RQ9	1	A	14	HELIX	HELIX	HELIX	-72.1372	-37.8699	175.561	-71.2963	-65.0633	-42.0592	178.903	-61.7861	-43.2382	-176.454	Alpha-R	Alpha-R	Alpha-R	98.8669	3.08887	2.98827	GLN	VAL	2.98827	3.08887
3RZN	1.1	A	112	HELIX	HELIX	HELIX	-61.667	-31.4781	-179.367	-71.3794	-80.9501	0.769814	173.409	-59.1811	-51.1725	-178.079	Alpha-R	Alpha-R	Alpha-R	136.123	2.97868	3.30161	ILE	ASP	3.30161	2.97868
3RZN	1.1	A	36	HELIX	HELIX	HELIX	-105.95	11.9314	-175.21	-48.9144	-98.3665	-4.22846	170.714	-78.2944	-4.80957	-177.674	Alpha-R	Alpha-R	Alpha-R	130.938	3.67387	3.56634	ASP	LEU	3.56634	3.67387
3RZN	1.1	A	176	HELIX	HELIX	HELIX	-56.5587	-47.714	-178.765	178.086	-65.5962	-35.5571	174.714	-65.4834	-42.0697	177.904	Alpha-R	Alpha-R	Alpha-R	104.694	2.84228	2.96385	GLU	LEU	2.96385	2.84228
3S6E	0.95	A	454	HELIX	HELIX	HELIX	-61.3917	-31.5173	-177.827	-69.2091	-82.8508	8.0791	162.483	-64.665	-44.3585	177.743	Alpha-R	Alpha-R	Alpha-R	136.42	2.86853	3.33085	GLU	ASN	3.33085	2.86853
3S6E	0.95	B	478	N/A	N/A	SHEET	-106.987	163.368	-171.565	-64.4073	-76.6638	-8.23631	175.162	-123.375	131.898	177.372	Beta	Alpha-R	Beta	130.69	3.77158	3.17088	LYS	PRO	3.17088	3.77158
3S6E	0.95	B	425	SHEET	SHEET	N/A	-128.053	143.625	178.905	-55.0428	-151.71	165.26	178.788	-69.5632	-10.4911	-161.778	Beta	Beta	Alpha-R	116.017	3.93681	4.09733	GLN	PHE	4.09733	3.93681
3SK2	1.01	A	126	SHEET	SHEET	SHEET	-153.347	173.226	-178.371	59.08	-93.8886	148.503	173.887	-102.944	131.442	-173.713	Beta	Beta	Beta	105.176	4.1637	3.46874	VAL	PRO	3.46874	4.1637
3SU6	1.1	A	1016	N/A	HELIX	HELIX	-60.656	-49.3325	-178.1	-179.829	-60.6125	-43.0458	178.416	-62.4164	-37.8628	177.843	Alpha-R	Alpha-R	Alpha-R	100.013	2.89601	2.88837	GLY	GLN	2.88837	2.89601
3SU6	1.1	A	1097	N/A	N/A	N/A	-69.8946	134.165	172.429	-177.751	-122.022	16.7492	-174.131	-59.9364	135.329	-179.353	Beta	N/A	Beta	139.951	3.11896	3.9671	PRO	THR	3.9671	3.11896
3SU6	1.1	A	1099	N/A	N/A	N/A	-76.9391	-27.1305	-175.719	-63.0442	63.4933	28.5942	-179.868	-122.022	16.7492	-174.131	Alpha-R	Alpha-L	N/A	113.812	3.24695	3.02512	THR	GLY	3.02512	3.24695
3SU6	1.1	A	1145	N/A	N/A	N/A	-85.8667	176.098	179.557	78.3433	-58.0047	-28.7871	179.91	-117.431	153.512	173.292	Beta	Alpha-R	Beta	116.172	3.4089	2.90651	LEU	PRO	2.90651	3.4089
3T7L	1.09	A	781	HELIX	N/A	HELIX	-155.295	80.5153	-176.659	-176.385	-139.237	2.69921	175.766	-92.9925	-5.25431	-175.761	Beta	N/A	Alpha-R	128.867	4.13123	4.05156	CYS	ASN	4.05156	4.13123
3T7L	1.09	A	785	SHEET	SHEET	SHEET	-134.384	155.394	170.631	-73.4022	-71.7486	128.93	174.266	-116.38	148.273	175.136	Beta	Beta	Beta	109.504	4.15248	3.09277	LYS	LYS	3.09277	4.15248
3T7L	1.09	A	800	HELIX	HELIX	HELIX	-64.935	-35.0809	-179.189	-65.9148	-57.8437	-49.7267	-175.661	-68.9368	-53.3106	-177.573	Alpha-R	Alpha-R	Alpha-R	98.1347	2.95983	2.81663	VAL	TYR	2.81663	2.95983
3T7L	1.09	A	780	HELIX	HELIX	HELIX	-92.9925	-5.25431	-175.761	-62.4534	-155.295	80.5153	-176.659	-61.0629	-28.9814	176.87	Alpha-R	Beta	Alpha-R	135.23	3.25862	4.13123	VAL	CYS	4.13123	3.25862
3T7L	1.09	A	772	N/A	N/A	N/A	-110.265	-12.5734	176.389	69.2386	79.7121	-2.57418	178.712	-90.465	-43.2027	-176.423	N/A	Alpha-L	Alpha-R	137.529	3.72688	3.30017	ALA	GLY	3.30017	3.72688
3T7L	1.09	A	797	HELIX	HELIX	SHEET	-77.8023	172.897	-177.863	71.919	-58.5859	-38.6887	-179.002	-135.824	156.611	-178.761	Beta	Alpha-R	Beta	108.325	3.21655	2.8807	VAL	VAL	2.8807	3.21655
3T7L	1.09	A	756	N/A	N/A	N/A	-96.3679	-6.63435	176.314	73.7245	76.9987	2.41527	177.807	-104.993	-62.8532	-168.26	Alpha-R	Alpha-L	Alpha-R	138.519	3.47541	3.35024	ASN	GLN	3.35024	3.47541
3T7L	1.09	A	777	HELIX	HELIX	SHEET	-73.9789	165.849	-176.831	76.3834	-61.5183	72.7307	-147.305	-136.688	158.478	164.954	Beta	Beta	Beta	145.583	3.25692	2.86266	PHE	GLY	2.86266	3.25692
3T7L	1.09	A	769	N/A	N/A	SHEET	-78.6709	125.989	-179.501	176.335	-75.8623	-11.3295	176.018	-87.8808	142.065	167.612	Beta	Alpha-R	Beta	127.497	3.29894	3.16913	HIS	ARG	3.16913	3.29894
3T7L	1.09	A	753	N/A	N/A	N/A	-55.6565	130.604	-175.413	176.373	-83.2958	4.11338	164.511	-137.833	150.265	174.409	Beta	Alpha-R	Beta	137.197	2.83633	3.27931	ASN	MET	3.27931	2.83633
3TC8	1.06	B	70	HELIX	HELIX	HELIX	-65.1143	-40.093	179.106	-172.87	-61.0321	-42.866	178.138	-67.1247	-45.4073	179.845	Alpha-R	Alpha-R	Alpha-R	103.935	2.98436	2.8433	ALA	GLY	2.8433	2.98436
3TC8	1.06	B	196	HELIX	HELIX	N/A	61.7717	40.5391	-172.662	-50.7175	-68.0509	-40.4236	179.792	-95.5797	162.715	169.594	Alpha-L	Alpha-R	Beta	106.113	2.85598	3.00004	TRP	LEU	3.00004	2.85598
3U7Q	1	D	395	SHEET	N/A	SHEET	-136.431	96.7495	-173.663	-178.006	-57.7642	-39.7502	-177.52	-116.337	128.162	174.745	Beta	Alpha-R	Beta	101.879	4.00488	2.87161	LEU	HIS	2.87161	4.00488
3U7Q	1	D	113	N/A	SHEET	N/A	-166.451	140.8	176.051	-175.428	-116.057	161.613	169.953	-97.9672	132.468	-177.553	Beta	Beta	Beta	109.792	4.22343	3.85115	SER	VAL	3.85115	4.22343
3U7Q	1	A	275	HELIX	HELIX	N/A	-81.0201	93.2997	174.616	-172.754	-56.2443	-48.3751	-172.228	-89.3517	-68.4099	175.378	Beta	Alpha-R	Alpha-R	100.705	3.24646	2.96501	HIS	TYR	2.96501	3.24646
3U7Q	1	C	249	SHEET	SHEET	SHEET	-86.4197	96.1822	-176.022	-166.382	-70.0483	-32.065	-175.526	-118.713	111.588	-177.935	Beta	Alpha-R	Beta	109.498	3.34858	3.06076	ARG	VAL	3.06076	3.34858
3U7Q	1	C	154	HELIX	HELIX	HELIX	-43.5408	-48.1325	-171.138	-78.6543	-64.7755	-25.008	-164.657	-93.3778	172.642	-170.48	Alpha-R	Alpha-R	Beta	119.305	2.6666	2.92061	GLU	PRO	2.92061	2.6666
3U7Q	1	A	45	HELIX	HELIX	HELIX	-120.313	-34.7831	-170.098	-58.8866	-154.916	142.802	172.849	-83.1336	-13.7615	-164.766	N/A	Beta	Alpha-R	117.289	3.98148	4.12635	LYS	ILE	4.12635	3.98148
3U7Q	1	B	388	HELIX	SHEET	HELIX	-98.3516	161.085	179.109	-56.2309	-109.885	107.584	178.948	76.2226	22.531	176.264	Beta	Beta	Alpha-L	138.94	3.64614	3.80987	GLY	GLU	3.80987	3.64614
3U7Q	1	D	95	HELIX	HELIX	HELIX	-60.8673	-43.9777	-177.109	-54.524	-67.6956	-36.702	173.735	-58.9663	-34.5676	-179.163	Alpha-R	Alpha-R	Alpha-R	102.441	2.92198	3.04355	GLY	VAL	3.04355	2.92198
3U7Q	1	C	88	SHEET	SHEET	SHEET	-45.1513	-49.3885	-176.697	-32.3739	-68.6226	-28.4455	179.932	-67.6054	-58.5984	-174.559	Alpha-R	Alpha-R	Alpha-R	110.149	2.65093	3.07375	GLY	GLY	3.07375	2.65093
3U7Q	1	D	153	HELIX	HELIX	SHEET	-68.8538	-30.8943	173.678	44.1349	-55.7395	-47.5867	-178.496	-94.7674	169.081	-169.992	Alpha-R	Alpha-R	Beta	100.228	2.94997	2.86347	THR	MET	2.86347	2.94997
3U7Q	1	A	183	N/A	N/A	N/A	-101.125	29.0737	179.365	55.416	-52.2207	141.489	-175.535	-90.5382	64.7475	-176.261	Alpha-R	Beta	Beta	95.0919	3.68531	2.74997	ARG	GLU	2.74997	3.68531
3U7Q	1	A	471	HELIX	HELIX	HELIX	-61.0687	-32.0034	-170.29	61.7813	-71.619	-12.4862	176.098	-63.0063	-20.5136	-177.009	Alpha-R	Alpha-R	Alpha-R	126.888	2.86122	3.05821	PRO	TRP	3.05821	2.86122
3U7Q	1	A	62	HELIX	SHEET	N/A	-129.96	176.629	-178.251	66.5009	-62.695	-31.0787	178.27	-98.7339	-151.028	-172.008	Beta	Alpha-R	Beta	112.818	3.96805	2.98013	GLY	ALA	2.98013	3.96805
3U7Q	1	B	70	HELIX	HELIX	N/A	-101.507	157.912	-173.048	75.7646	-44.0343	-56.0019	-170.603	-128.245	-170.264	-171.348	Beta	Alpha-R	Beta	104.754	3.5796	2.77901	ALA	GLN	2.77901	3.5796
3U7Q	1	D	138	HELIX	HELIX	HELIX	-61.2133	-48.3711	-178.981	176.562	-59.4845	-46.5325	-178.525	-63.0779	-46.2774	-179.183	Alpha-R	Alpha-R	Alpha-R	99.1217	2.9676	2.8774	ASN	LYS	2.8774	2.9676
3U7Q	1	C	324	HELIX	HELIX	HELIX	-57.443	-50.357	179.075	177.307	-64.4345	-32.4446	173.421	-65.3429	-34.1562	177.255	Alpha-R	Alpha-R	Alpha-R	107.945	2.86237	2.95738	LYS	GLU	2.95738	2.86237
3U7Q	1	B	78	HELIX	SHEET	HELIX	-56.5148	-50.8533	-177.69	179.362	-59.114	-37.6741	-179.817	-59.3201	-43.3969	177.123	Alpha-R	Alpha-R	Alpha-R	107.94	2.87216	2.93822	LEU	ALA	2.93822	2.87216
3UI4	0.8	A	45	SHEET	N/A	SHEET	-134.583	132.577	176.679	-54.5423	-65.7535	-34.3396	-175.895	-114.874	126.661	172.007	Beta	Alpha-R	Beta	106.041	4.03974	2.93217	LEU	GLU	2.93217	4.03974
3ULJ	1.06	B	110	N/A	N/A	N/A	-61.0199	155.84	-177.215	-60.6204	-74.6426	-50.597	-175.105	-59.479	151.888	174.123	Beta	Alpha-R	Beta	96.4614	2.99186	3.18239	PRO	LEU	3.18239	2.99186
3ULJ	1.06	B	37	SHEET	SHEET	SHEET	-66.5118	122.281	178.324	173.515	-76.9463	-51.0274	173.124	-141.935	157.725	175.104	Beta	Alpha-R	Beta	95.9353	3.0057	3.26071	HIS	LYS	3.26071	3.0057
3V0D	1.1	A	500	N/A	N/A	N/A	-65.601	132.585	172.992	-171.239	-73.7999	166.612	172.508	67.6733	22.2136	177.178	Beta	Beta	Alpha-L	87.1277	2.89965	3.10931	ASN	PRO	3.10931	2.89965
3V0D	1.1	B	495	SHEET	SHEET	SHEET	-123.201	120.474	173.436	-89.5198	-72.1418	128.479	-177.734	-129.265	127.338	-178.286	Beta	Beta	Beta	114.205	3.84569	3.15056	THR	GLU	3.15056	3.84569
3V0D	1.1	A	310	SHEET	N/A	SHEET	-94.1478	119.017	169.742	-59.5915	-66.0852	-25.0934	-166.61	-93.2472	8.4501	-173.701	Beta	Alpha-R	Alpha-R	114.804	3.40268	2.98045	LEU	SER	2.98045	3.40268
3V0D	1.1	A	474	SHEET	SHEET	SHEET	-119.934	131.79	177.816	-57.7862	-118.453	113.48	-162.096	-130.196	129.547	177.031	Beta	Beta	Beta	132.309	3.91724	3.81315	LEU	LYS	3.81315	3.91724
3V0D	1.1	A	482	SHEET	SHEET	N/A	-168.62	175.501	173.143	66.8056	-144.854	115.767	-175.182	54.225	32.2591	-178.794	Beta	Beta	Alpha-L	127.362	4.17407	4.16263	ASN	ALA	4.16263	4.17407
3V0D	1.1	B	525	HELIX	N/A	HELIX	-156.361	163.193	177.664	67.4132	-60.2057	-46.872	-178.865	52.8206	38.2412	177.392	Beta	Alpha-R	Alpha-L	97.7975	4.13673	2.95626	ASN	PRO	2.95626	4.13673
3V0D	1.1	A	492	SHEET	SHEET	N/A	-148.054	153.556	169.188	172.681	-118.611	141.949	174.698	53.9504	51.2859	-173.309	Beta	Beta	Alpha-L	118.306	4.11522	3.9056	ASP	VAL	3.9056	4.11522
3VII	0.97	A	257	SHEET	SHEET	SHEET	-125.109	106.946	-174.762	-163.755	-93.4623	133.464	179.868	-66.2163	144.484	176.91	Beta	Beta	Beta	118.754	3.9429	3.47843	TRP	GLU	3.47843	3.9429
3VII	0.97	A	270	HELIX	HELIX	HELIX	-72.6445	-35.1953	172.245	-65.8581	-65.0272	-41.5313	173.042	-65.7095	-34.151	178.391	Alpha-R	Alpha-R	Alpha-R	100.604	3.14215	3.0195	SER	GLU	3.0195	3.14215
3VUP	1.05	A	109	SHEET	SHEET	SHEET	-107.743	116.236	-169.08	176.731	-71.1516	-52.9573	-169.238	-69.0163	135.172	177.076	Beta	Alpha-R	Beta	93.1525	3.72002	3.06444	PRO	LEU	3.06444	3.72002
3VZ9	1.03	B	194	SHEET	SHEET	SHEET	-154.379	117.681	-173.318	-169.886	-136.904	111.828	-1.56563	-160.889	158.231	174.272	Beta	Beta	Beta	132.467	4.18198	4.03842	SER	THR	4.03842	4.18198
3VZ9	1.03	D	181	SHEET	SHEET	SHEET	-67.6333	-41.1021	178.876	-66.3865	-67.3746	-38.1542	174.078	-57.4338	-43.766	-178.008	Alpha-R	Alpha-R	Alpha-R	103.137	3.01136	3.0139	ARG	PHE	3.0139	3.01136
3VZ9	1.03	B	200	HELIX	HELIX	N/A	-101.438	-9.32184	-169.561	49.9702	-68.5904	-32.1712	175.203	-65.7545	-22.0269	-173.816	Alpha-R	Alpha-R	Alpha-R	107.685	3.60551	2.97403	ASP	ILE	2.97403	3.60551
3VZ9	1.03	B	139	HELIX	HELIX	HELIX	-62.5049	-48.709	-177.518	175.235	-59.1919	-44.3293	178.401	-64.8587	-42.0723	175.858	Alpha-R	Alpha-R	Alpha-R	100.729	2.97095	2.88467	LEU	LYS	2.88467	2.97095
3W07		A	65	N/A	SHEET	HELIX	-86.4941	146.862	169.895	-74.7453	-73.3421	154.865	-175.608	76.2288	4.25121	-169.827	Beta	Beta	Alpha-L	97.1211	3.8417	3.15844	GLY	ARG	3.15844	3.8417
3W07		A	84	HELIX	HELIX	HELIX	-61.9287	-44.2381	-177.305	-68.583	-67.3435	-35.3694	175.962	-61.1455	-46.5079	179.623	Alpha-R	Alpha-R	Alpha-R	91.8996	2.89799	2.9302	ILE	ARG	2.9302	2.89799
3W07		A	109	HELIX	HELIX	HELIX	-67.0819	-44.6244	177.736	-61.953	-59.1338	-38.807	-179.396	-56.3848	-43.0057	-179.782	Alpha-R	Alpha-R	Alpha-R	105.134	3.05426	2.91728	ALA	LEU	2.91728	3.05426
3W42	1.06	A	105	SHEET	SHEET	SHEET	-144.965	139.837	-173.233	-171.593	-150.21	150.15	163.658	-145.725	135.739	175.745	Beta	Beta	Beta	117.201	4.10419	4.14506	TYR	SER	4.14506	4.10419
3W42	1.06	A	25	N/A	N/A	N/A	-77.4332	136.473	172.092	-168.043	-90.0323	-9.3037	176.952	-104.051	120.362	177.774	Beta	Alpha-R	Beta	124.079	3.17716	3.49351	ILE	GLY	3.49351	3.17716
3W42	1.06	A	78	HELIX	HELIX	HELIX	-57.881	-45.4114	178.3	-67.7375	-59.2183	-45.0333	178.301	-58.9796	-43.9649	176.817	Alpha-R	Alpha-R	Alpha-R	98.7064	2.96735	2.8813	ARG	ASN	2.8813	2.96735
3W42	1.06	A	40	SHEET	SHEET	SHEET	-149.316	152.007	177.765	107.138	-151.444	150.275	174.316	-122.382	134.833	170.051	Beta	Beta	Beta	116.265	4.11127	4.11954	ILE	ALA	4.11954	4.11127
3W5H	0.78	A	1245	N/A	N/A	N/A	-156.635	120.195	-178.786	-170.13	-177.607	179.564	-179.225	-137.259	146.829	167.806	Beta	Beta	Beta	109.652	4.18401	4.20524	MET	GLY	4.20524	4.18401
3W5H	0.78	A	1255	N/A	HELIX	HELIX	-86.358	-66.754	-171.66	-65.1785	-58.6464	-43.0252	-177.293	-92.4333	-42.4368	-170.756	Alpha-R	Alpha-R	Alpha-R	100.911	3.31325	2.79324	ALA	LEU	2.79324	3.31325
3W5H	0.78	A	1175	N/A	N/A	N/A	-100.777	132.793	176.553	-64.7124	-120.11	111.89	-177.529	-104.005	123.772	177.947	Beta	Beta	Beta	133.514	3.64931	3.89398	VAL	HIS	3.89398	3.64931
3W5H	0.78	A	1269	N/A	N/A	HELIX	41.3329	140.68	-171.379	-60.7021	-143.612	129.262	174.29	-99.9149	-105.874	161.293	N/A	Beta	N/A	122.657	4.32743	4.02735	ARG	PHE	4.02735	4.32743
3WA2	1.08	X	315	N/A	N/A	N/A	-110.11	-66.0127	-176.236	-168.802	-83.9005	-37.0559	-179.359	86.5352	-13.2194	-176.818	N/A	Alpha-R	Alpha-L	105.79	3.7294	3.32695	GLY	ASP	3.32695	3.7294
3WDN	0.86	A	37	SHEET	SHEET	SHEET	-122.815	116.455	176.932	-57.2957	-96.225	111.459	-168.756	-164.844	141.669	176.81	Beta	Beta	Beta	132.139	3.9352	3.56134	TYR	SER	3.56134	3.9352
3WDN	0.86	A	90	N/A	N/A	HELIX	-64.1416	-24.0685	-179.895	65.3692	-96.7962	-9.95585	-171.493	-150.441	58.3679	-168.803	Alpha-R	Alpha-R	N/A	125.035	2.93611	3.60451	SER	TYR	3.60451	2.93611
3WH1	1	A	192	HELIX	HELIX	HELIX	-60.5689	-39.9733	176.842	-75.083	-59.6274	-45.3114	177.438	-68.653	-37.4215	173.179	Alpha-R	Alpha-R	Alpha-R	98.506	2.95639	2.9199	PHE	GLN	2.9199	2.95639
3WH1	1	A	145	HELIX	HELIX	HELIX	-56.0923	-37.2654	176.725	-64.2623	-51.4285	-50.9098	-178.708	73.1367	30.3211	159.636	Alpha-R	Alpha-R	Alpha-L	98.5898	2.93313	2.89619	ASP	HIS	2.89619	2.93313
3ZIY	1.01	A	135	N/A	N/A	SHEET	-68.4754	150.632	-174.988	-173.64	-133.07	37.8264	-177.591	-160.808	165.86	173.07	Beta	N/A	Beta	148.342	3.06935	4.07498	HIS	ALA	4.07498	3.06935
3ZIY	1.01	A	367	HELIX	HELIX	HELIX	-99.577	-45.9582	-173.013	-59.9115	-86.5569	-6.47129	-178.153	-54.4976	-39.42	179.692	Alpha-R	Alpha-R	Alpha-R	127.034	3.64504	3.35174	VAL	HIS	3.35174	3.64504
3ZIY	1.01	A	364	HELIX	HELIX	N/A	-112.168	-33.7957	-171.792	-47.3329	-68.3039	-21.8321	-179.181	-43.6741	-49.0552	175.75	N/A	Alpha-R	Alpha-R	118.706	3.82281	3.01403	THR	SER	3.01403	3.82281
3ZOJ	0.88	A	183	HELIX	HELIX	HELIX	-67.8966	-36.7733	179.026	-70.5582	-66.4204	-34.138	174.523	-57.8982	-51.9157	-174.306	Alpha-R	Alpha-R	Alpha-R	107.897	2.97494	2.99759	LEU	LEU	2.99759	2.97494
3ZOJ	0.88	A	215	HELIX	HELIX	HELIX	-106.039	-30.5611	-170.978	-67.4339	-51.7297	-49.2238	-172.967	-71.0265	-44.0307	-161.508	Alpha-R	Alpha-R	Alpha-R	99.29	3.6329	2.65039	ILE	ILE	2.65039	3.6329
3ZSJ	CRYO	A	173	SHEET	SHEET	SHEET	-119.051	143.01	-178.548	-63.7946	-164.19	179.486	176.575	-108.817	127.997	175.087	Beta	Beta	Beta	111.352	3.89245	4.21016	VAL	ASN	4.21016	3.89245
3ZUC	1	A	59	SHEET	SHEET	SHEET	-91.3741	115.159	179.178	178.376	-81.5437	-162.574	145.383	-122.86	131.691	165.586	Beta	Beta	Beta	107.978	3.47515	3.29687	TRP	ASP	3.29687	3.47515
4A7U	0.98	A	6	SHEET	SHEET	SHEET	-146.343	128.796	173.34	-175.387	-99.783	119.701	-178.562	-153.725	154.01	178.748	Beta	Beta	Beta	127.448	4.12267	3.63077	VAL	VAL	3.63077	4.12267
4A7U	0.98	A	111	N/A	N/A	HELIX	-65.01	129.778	177.546	-170.356	-97.547	-9.36209	179.854	-89.8041	6.77105	-174.952	Beta	Alpha-R	Alpha-R	125.735	2.9545	3.61241	HIS	ILE	3.61241	2.9545
4A9V	1.1	A	400	SHEET	SHEET	SHEET	-139.511	127.714	172.161	-178.828	-77.463	140.633	171.619	-126.114	138.087	-176.517	Beta	Beta	Beta	107.189	4.07294	3.19197	TYR	THR	3.19197	4.07294
4A9V	1.1	A	179	SHEET	SHEET	SHEET	-91.7206	-87.228	178.91	-178.808	-125.562	-161.353	-144.931	-77.7155	110.897	-169.893	N/A	Beta	Beta	91.7408	3.42729	3.84218	ASN	ALA	3.84218	3.42729
4A9V	1.1	A	513	SHEET	SHEET	SHEET	-130.452	137.824	-173.825	-165.673	-129.011	150.423	171.883	-124.169	166.525	179.221	Beta	Beta	Beta	117.71	3.99176	3.95959	LEU	ALA	3.95959	3.99176
4A9V	1.1	A	116	HELIX	N/A	HELIX	-70.49	-23.1657	-169.809	-73.9259	-104.625	162.216	179.479	-65.641	-28.7354	-179.878	Alpha-R	Beta	Alpha-R	102.387	3.18635	3.67041	ALA	GLU	3.67041	3.18635
4A9V	1.1	A	192	SHEET	SHEET	SHEET	-116.662	122.273	177.379	-70.4435	-85.5667	117.753	-172.187	-116.826	143.363	-166.011	Beta	Beta	Beta	126.333	3.76787	3.37219	THR	GLU	3.37219	3.76787
4A9V	1.1	A	199	HELIX	HELIX	HELIX	-82.5208	-9.6513	-176.356	-61.633	-101.336	148.576	172.909	-56.4603	-29.7268	-169.58	Alpha-R	Beta	Alpha-R	108.693	3.34897	3.61282	ASP	PHE	3.61282	3.34897
4A9V	1.1	A	531	N/A	SHEET	N/A	-83.9701	168.282	148.875	83.8055	-117.351	156.652	-178.717	82.4932	-2.38246	-178.385	Beta	Beta	Alpha-L	109.001	3.33703	3.98729	GLY	GLU	3.98729	3.33703
4ACJ	0.97	A	776	N/A	N/A	N/A	-147.93	158.522	-177.775	76.7801	-73.8877	-30.0876	-175.913	-57.6587	145.932	171.648	Beta	Alpha-R	Beta	114.092	4.11402	3.19438	SER	LYS	3.19438	4.11402
4ANN	1.05	A	160	HELIX	HELIX	HELIX	-62.231	-38.2569	-179.721	-70.4788	-62.7437	-32.5928	-177.779	-59.6042	-46.5322	179.628	Alpha-R	Alpha-R	Alpha-R	110.769	2.96095	2.92155	ILE	ALA	2.92155	2.96095
4AXO	1	A	82	SHEET	SHEET	SHEET	-153.442	131.001	177.735	178.43	-153.987	-177.963	178.591	-90.4316	149.687	173.588	Beta	Beta	Beta	110.783	4.12442	4.17775	GLY	GLY	4.17775	4.12442
4AYO	0.85	A	420	N/A	HELIX	N/A	-102.72	108.083	-178.599	-176.727	-64.2761	145.674	179.767	-166.679	131.624	167.277	Beta	Beta	Beta	98.7014	3.68754	2.92112	ASN	PRO	2.92112	3.68754
4AYO	0.85	A	274	HELIX	HELIX	HELIX	-64.3466	-43.5838	-179.597	-75.2237	-66.7402	-40.2768	174.475	-60.0523	-45.2998	-176.725	Alpha-R	Alpha-R	Alpha-R	101.444	2.90139	3.022	GLU	VAL	3.022	2.90139
4AYO	0.85	A	267	HELIX	HELIX	HELIX	-65.1779	-36.4111	175.228	-71.6343	-58.9044	-47.0001	179.119	-63.3386	-46.3283	-178.348	Alpha-R	Alpha-R	Alpha-R	99.9166	2.95836	2.90693	ASP	LYS	2.90693	2.95836
4AYO	0.85	A	370	HELIX	HELIX	HELIX	-58.2729	-46.2831	179.923	-71.0784	-63.9962	-46.4688	-177.697	-61.6181	-43.488	-179.734	Alpha-R	Alpha-R	Alpha-R	98.916	2.86394	2.95758	ALA	LEU	2.95758	2.86394
4B5O	1.05	A	120	SHEET	SHEET	SHEET	-116.438	142.153	168.933	-64.5553	-85.8637	115.287	-169.753	-67.3827	132.669	-178.622	Beta	Beta	Beta	128.254	3.81201	3.42503	LEU	ILE	3.42503	3.81201
4BPF	1.01	A	15	HELIX	HELIX	HELIX	-73.8078	-14.583	-174.082	-64.975	58.7352	33.4655	-172.414	-66.5521	-44.1184	-179.812	Alpha-R	Alpha-L	Alpha-R	115.577	3.18471	3.03863	VAL	GLN	3.03863	3.18471
4BPS	1.08	A	263	HELIX	HELIX	HELIX	-66.2837	-41.2193	178.096	-169.885	-61.6544	-43.4761	179.156	-61.5689	-40.9348	-178.197	Alpha-R	Alpha-R	Alpha-R	100.823	2.97712	2.94751	GLN	GLU	2.94751	2.97712
4BPS	1.08	A	22	SHEET	SHEET	SHEET	-116.685	150.613	165.858	-167.351	-134.221	149.475	170.069	-152.143	165.289	-169.283	Beta	Beta	Beta	114.6	3.80726	4.12688	TYR	ARG	4.12688	3.80726
4BPS	1.08	A	159	HELIX	HELIX	HELIX	-61.8668	-39.0115	176.076	-77.8105	-57.0431	-49.3414	-178.49	-57.343	-46.2171	-179.747	Alpha-R	Alpha-R	Alpha-R	97.1972	2.91831	2.90363	PHE	VAL	2.90363	2.91831
4BPS	1.08	A	313	HELIX	HELIX	HELIX	-66.1814	-42.0556	-178.185	-71.6047	-62.5765	-24.7903	178.018	-60.7931	-45.0944	-179.011	Alpha-R	Alpha-R	Alpha-R	117.8	2.97971	2.98212	VAL	ALA	2.98212	2.97971
4BPS	1.08	A	191	SHEET	SHEET	SHEET	-118.445	129.377	175.989	176.184	-118.627	142.803	178.537	-114.589	132.912	177.068	Beta	Beta	Beta	116.632	3.91378	3.89228	THR	VAL	3.89228	3.91378
4CJ0	1.1	A	155	N/A	N/A	N/A	-112.046	148.608	175.424	-175.881	89.9258	1.99115	-177.726	-59.1978	144.456	178.452	Beta	Alpha-L	Beta	132.494	3.81738	3.44684	ARG	GLY	3.44684	3.81738
4CJ0	1.1	A	324	HELIX	HELIX	HELIX	-60.8411	-48.2935	-175.556	-72.9803	-70.877	-34.899	177.194	-58.1168	-45.8813	-178.295	Alpha-R	Alpha-R	Alpha-R	105.09	2.93856	2.96676	LYS	ILE	2.96676	2.93856
4CJ0	1.1	A	173	N/A	N/A	N/A	-126.77	152.979	169.832	61.0078	51.9017	46.7533	-175.641	-61.4399	136.01	-177.12	Beta	Alpha-L	Beta	104.979	3.90181	2.78063	PRO	HIS	2.78063	3.90181
4CJ0	1.1	A	75	N/A	N/A	N/A	-164.872	174.806	176.029	64.4353	-143.626	-82.7767	-175.879	-64.0094	133.016	-177.659	Beta	N/A	Beta	103.422	4.23141	4.08711	ASN	SER	4.08711	4.23141
4CJ0	1.1	A	459	HELIX	HELIX	HELIX	-63.7687	-24.1909	175.835	67.004	-60.2515	-38.1428	176.751	90.9718	3.94942	-173.276	Alpha-R	Alpha-R	Alpha-L	107.742	2.92952	2.85742	GLY	ASN	2.85742	2.92952
4D8B	1.06	A	192	HELIX	HELIX	HELIX	-58.0329	-34.2205	-177.359	61.8706	-66.0944	-41.2994	178.233	96.3004	135.642	-179.676	Alpha-R	Alpha-R	N/A	102.135	2.85176	2.96872	GLY	VAL	2.96872	2.85176
4DP9	1	X	84	N/A	HELIX	SHEET	-96.1512	118.652	-170.721	171.601	-58.6254	-49.003	-176.945	-158.226	162.018	167.678	Beta	Alpha-R	Beta	95.685	3.61382	2.86481	TYR	SER	2.86481	3.61382
4E9S	1.06	A	138	SHEET	SHEET	SHEET	-108.498	-172.416	179.146	-67.3211	-153.1	175.618	-179.007	-102.359	112.287	176.117	Beta	Beta	Beta	109.516	3.77953	4.08531	THR	TRP	4.08531	3.77953
4E9S	1.06	A	239	N/A	N/A	N/A	-71.6867	153.366	175.99	-61.1755	-66.6939	-39.5738	-167.366	-98.3329	17.0388	176.295	Beta	Alpha-R	Alpha-R	104.728	3.19111	3.04481	GLY	ASN	3.04481	3.19111
4E9S	1.06	A	500	SHEET	N/A	SHEET	-68.843	137.176	179.311	177.173	-95.9738	13.3346	160.535	-162.76	160.389	165.575	Beta	Alpha-R	Beta	141.208	3.1372	3.57903	HIS	HIS	3.57903	3.1372
4EA9	0.9	A	29	HELIX	N/A	HELIX	-87.3114	1.74334	-177.262	-67.6906	86.9202	5.43945	177.154	-63.3004	-26.2987	175.617	Alpha-R	Alpha-L	Alpha-R	125.208	3.46789	3.38606	ALA	GLY	3.38606	3.46789
4EA9	0.9	A	143	N/A	SHEET	N/A	-85.9879	157.034	179.457	-65.7316	-131.253	111.207	-176.29	65.1113	28.0812	174.385	Beta	Beta	Alpha-L	131.563	3.3536	3.99796	ASP	ARG	3.99796	3.3536
4EA9	0.9	A	149	N/A	SHEET	N/A	-77.8898	171.001	-178.602	72.3789	-140.99	44.5079	145.263	63.1936	20.2799	169.946	Beta	N/A	Alpha-L	129.748	3.19361	4.08538	ALA	HIS	4.08538	3.19361
4EGU	0.95	A	90	SHEET	HELIX	SHEET	-118.986	112.107	177.809	-173.605	75.6969	-176.654	-167.664	-106.215	121.528	-175.198	Beta	PPII-R	Beta	82.2646	3.82403	3.15121	ASN	GLY	3.15121	3.82403
4EGU	0.95	B	9	HELIX	HELIX	HELIX	-57.3824	-44.5967	-176.787	-82.6194	-72.8869	-36.9973	172.044	-80.8389	-28.0963	169.029	Alpha-R	Alpha-R	Alpha-R	106.127	2.86974	3.14795	PHE	LYS	3.14795	2.86974
4EGU	0.95	B	6	HELIX	HELIX	N/A	-94.1144	118.283	-178.734	178.517	-62.204	-33.8352	-178.828	-96.6436	7.32318	-170.999	Beta	Alpha-R	Alpha-R	109.193	3.41861	2.93194	ASP	ILE	2.93194	3.41861
4EIC	0.84	A	17	HELIX	HELIX	HELIX	-97.0065	-22.2291	-170.305	-65.4338	-128.509	27.7729	178.274	-62.3257	-35.8408	177.728	Alpha-R	N/A	Alpha-R	142.931	3.57569	3.99571	ALA	HIS	3.99571	3.57569
4EIC	0.84	A	14	HELIX	HELIX	HELIX	-134.379	-19.1522	-173.452	-42.031	-71.8327	-25.131	178.383	-132.451	-11.5083	-166.166	N/A	Alpha-R	N/A	115.999	3.96546	3.071	ASN	ALA	3.071	3.96546
4EKF	0.98	A	199	N/A	N/A	N/A	-115.456	38.8226	175.634	-80.7785	-56.5175	-32.0939	-175.023	-60.9696	-35.365	174.857	N/A	Alpha-R	Alpha-R	108.12	3.84402	2.80769	PHE	HIS	2.80769	3.84402
4EKF	0.98	A	67	SHEET	SHEET	SHEET	-97.4144	137.996	176.282	-73.0023	-115.949	136.789	171.05	-129.231	127.371	169.614	Beta	Beta	Beta	122.349	3.67935	3.84565	THR	TYR	3.84565	3.67935
4EKF	0.98	A	126	HELIX	HELIX	HELIX	-61.8995	-40.9448	175.798	-72.6261	-59.8219	-43.9202	178.712	-60.2925	-37.4114	176.811	Alpha-R	Alpha-R	Alpha-R	102.537	2.93378	2.95022	PHE	CYS	2.95022	2.93378
4EKF	0.98	A	127	HELIX	HELIX	HELIX	-59.8219	-43.9202	178.712	-66.1405	-60.5815	-43.6223	175.328	-61.8995	-40.9448	175.798	Alpha-R	Alpha-R	Alpha-R	99.6632	2.95022	2.94293	CYS	MET	2.94293	2.95022
4EKF	0.98	A	17	HELIX	HELIX	N/A	-89.3703	-4.5212	-177.248	-39.0151	-44.9884	-47.2937	-178.701	93.2267	14.9072	-177.497	Alpha-R	Alpha-R	Alpha-L	104.528	3.35993	2.80194	GLY	GLY	2.80194	3.35993
4EKF	0.98	A	40	SHEET	SHEET	SHEET	-151.926	164.784	-175.081	64.3637	-161.098	163.609	168.962	-149.993	152.909	173.25	Beta	Beta	Beta	112.146	4.14788	4.18512	ALA	ALA	4.18512	4.14788
4ES1	1.1	A	27	HELIX	HELIX	HELIX	-69.9457	-31.5566	-179.238	-70.0864	-62.3176	-22.7665	176.102	-62.8753	-44.4276	-179.809	Alpha-R	Alpha-R	Alpha-R	115.252	3.04526	2.97728	ALA	GLN	2.97728	3.04526
4ES1	1.1	A	41	SHEET	SHEET	SHEET	-118.856	145.723	179.406	-61.336	-125.891	114.669	-163.252	-106.651	114.94	-176.31	Beta	Beta	Beta	129.802	3.87294	3.91684	GLU	ILE	3.91684	3.87294
4ESP	1.1	A	13	N/A	N/A	HELIX	-63.3942	149.73	179.668	64.2439	-81.1868	149.984	175.387	-102.775	30.7027	176.571	Beta	Beta	N/A	104.037	3.02586	3.20055	LEU	GLU	3.20055	3.02586
4ESP	1.1	A	115	HELIX	HELIX	HELIX	-58.7822	-50.519	-179.623	176.802	-55.6642	-47.4858	-174.233	-67.7188	-39.876	175.413	Alpha-R	Alpha-R	Alpha-R	101.073	2.91811	2.79448	GLN	ASN	2.79448	2.91811
4FK9	1.06	A	124	HELIX	HELIX	HELIX	-58.2215	-46.1659	178.785	-70.5266	-61.8378	-42.8284	178.486	-65.3888	-42.8739	176.817	Alpha-R	Alpha-R	Alpha-R	100.222	2.86804	2.919	ARG	LYS	2.919	2.86804
4FK9	1.06	A	131	SHEET	SHEET	SHEET	-117.924	118.04	170.774	178.242	-100.075	113.269	176.328	-70.8462	143.571	-172.691	Beta	Beta	Beta	131.891	3.81565	3.63803	ILE	VAL	3.63803	3.81565
4G78	0.92	A	102	HELIX	HELIX	HELIX	-65.9492	-47.1155	-178.741	-70.6715	-63.4232	-28.0639	175.748	-68.8244	-34.0137	177.616	Alpha-R	Alpha-R	Alpha-R	109.699	2.99059	2.87078	PHE	GLU	2.87078	2.99059
4G78	0.92	A	95	HELIX	HELIX	HELIX	-57.5617	-32.5073	-178.184	-69.615	-72.6989	-13.3274	178.999	-62.584	-39.7075	-178.913	Alpha-R	Alpha-R	Alpha-R	120.569	2.79694	3.06891	VAL	GLY	3.06891	2.79694
4G78	0.92	A	110	HELIX	HELIX	HELIX	-61.4552	-41.8306	179.192	-69.2734	-59.6221	-46.6804	-179.908	-57.4141	-45.3161	178.19	Alpha-R	Alpha-R	Alpha-R	99.1037	2.87866	2.89587	GLY	VAL	2.89587	2.87866
4G78	0.92	A	113	HELIX	HELIX	HELIX	-56.198	-44.3717	178.676	-63.9237	-64.6148	-38.3505	176.683	-58.3647	-48.2798	-179.489	Alpha-R	Alpha-R	Alpha-R	102.144	2.93803	3.00687	ARG	LEU	3.00687	2.93803
4G9E	1.09	A	269	HELIX	HELIX	HELIX	-82.6134	-15.1328	-171.471	-70.2933	-126.766	-19.9575	-175.16	-62.0343	-38.2331	-175.404	Alpha-R	N/A	Alpha-R	118.864	3.30927	3.92987	ASP	THR	3.92987	3.30927
4G9E	1.09	A	165	HELIX	HELIX	HELIX	-96.0649	-24.0501	178.718	-65.4217	65.9293	-166.481	-179.089	-73.0604	-36.626	-171.178	Alpha-R	PPII-R	Alpha-R	82.0785	3.46383	3.04712	THR	GLY	3.04712	3.46383
4GA2	0.95	A	105	HELIX	HELIX	HELIX	-69.3909	-36.5249	179.338	-72.6825	-68.1087	-37.7882	-176.608	-66.8699	-39.2488	-179.994	Alpha-R	Alpha-R	Alpha-R	102.179	3.05474	2.99068	LEU	LYS	2.99068	3.05474
4GA2	0.95	A	82	HELIX	HELIX	HELIX	-66.5674	-44.2622	178.923	-71.799	-65.9217	-116.493	147.868	-56.4075	-48.8404	-176.215	Alpha-R	N/A	Alpha-R	102.995	3.00915	3.00182	GLU	TYR	3.00182	3.00915
4GA2	0.95	A	50	HELIX	HELIX	HELIX	-55.5873	24.6893	171.611	-66.1983	-120.28	-4.04921	-161.447	-65.2842	-46.67	177.411	Alpha-R	N/A	Alpha-R	56.3486	3.01352	3.9376	ILE	THR	3.9376	3.01352
4GA2	0.95	A	141	HELIX	N/A	HELIX	-100.083	7.22606	176.616	70.6857	-63.6211	137.838	171.501	-63.326	-30.9961	-175.511	Alpha-R	Beta	Alpha-R	103.36	3.5611	2.96614	ASP	GLU	2.96614	3.5611
4GJZ	1.05	A	232	N/A	N/A	HELIX	-86.2648	-3.33934	-176.425	-76.183	-89.6117	148.67	179.335	-55.5342	-34.6396	-176.204	Alpha-R	Beta	Alpha-R	105.954	3.3826	3.37983	GLY	ARG	3.37983	3.3826
4GJZ	1.05	A	295	HELIX	HELIX	HELIX	-60.4441	-23.6829	-178.602	-63.2646	-69.5456	-9.6732	175.011	-64.4011	-23.0083	178.794	Alpha-R	Alpha-R	Alpha-R	127.831	2.94919	3.04875	TYR	SER	3.04875	2.94919
4GJZ	1.05	A	217	HELIX	HELIX	HELIX	-53.8007	-32.6683	-171.164	57.243	-64.2029	-36.7068	176.389	-56.2197	-33.4622	179.29	Alpha-R	Alpha-R	Alpha-R	105.803	2.8366	2.93871	PRO	MET	2.93871	2.8366
4GJZ	1.05	A	384	SHEET	SHEET	SHEET	-159.958	165.224	160.263	61.956	-107.242	115.313	-179.404	-148.716	165.733	176.274	Beta	Beta	Beta	129.678	4.20858	3.81907	SER	ILE	3.81907	4.20858
4H4N	1.1	A	42	SHEET	SHEET	SHEET	-95.0475	138.028	175.921	-175.947	-138.508	141.756	173.387	-138.762	137.905	178.883	Beta	Beta	Beta	118.061	3.52348	4.08677	LYS	GLN	4.08677	3.52348
4H7W	1.1	A	214	SHEET	SHEET	SHEET	-144.939	161.921	169.536	60.454	-65.5219	142.602	174.438	-147.499	161.987	169.673	Beta	Beta	Beta	102.432	4.08749	3.13683	TRP	VAL	3.13683	4.08749
4H7W	1.1	A	253	SHEET	SHEET	SHEET	-126.52	132.121	169.845	174.712	-107.815	126.228	176.564	-128.859	148.616	170.74	Beta	Beta	Beta	125.573	3.99039	3.77254	ARG	LYS	3.77254	3.99039
4H7W	1.1	A	226	HELIX	HELIX	HELIX	-56.2869	-50.4404	-179.699	178.021	-55.7943	-45.3954	-179.078	-62.0529	-45.7175	-179.186	Alpha-R	Alpha-R	Alpha-R	102.751	2.82302	2.83684	GLN	LEU	2.83684	2.82302
4HNO	0.92	A	180	HELIX	HELIX	HELIX	-72.5191	-49.2933	177.908	-179.366	-57.116	-41.4057	179.668	-65.7867	-33.2719	178.668	Alpha-R	Alpha-R	Alpha-R	102.368	3.12561	2.81396	THR	HIS	2.81396	3.12561
4HNO	0.92	A	68	SHEET	SHEET	SHEET	-103.905	145.518	168.489	-173.667	-105.987	130.876	-179.281	-135.123	147.815	164.69	Beta	Beta	Beta	121.927	3.69411	3.76812	PHE	HIS	3.76812	3.69411
4HNO	0.92	A	98	HELIX	HELIX	HELIX	-55.3635	-47.6423	-176.799	-69.8362	-60.58	-40.0085	-179.537	-61.4569	-48.9089	177.106	Alpha-R	Alpha-R	Alpha-R	94.3437	2.82349	2.88604	ILE	ARG	2.88604	2.82349
4J8C	1.1	A	16	HELIX	HELIX	HELIX	-67.1229	-36.1418	175.56	-69.1147	-63.5173	-45.0788	-177.072	-58.8637	-43.1773	-179.561	Alpha-R	Alpha-R	Alpha-R	118.08	3.05365	2.98455	MET	ARG	2.98455	3.05365
4JED	1.1	A	106	HELIX	HELIX	HELIX	-60.6968	-39.9073	179.553	-67.9581	-59.8485	-42.9387	-179.568	-61.8131	-48.8494	-178.902	Alpha-R	Alpha-R	Alpha-R	103.319	2.90515	2.83364	ILE	ASP	2.83364	2.90515
4JED	1.1	A	102	HELIX	HELIX	HELIX	-52.0471	-51.1506	-174.658	165.865	-65.3594	-41.2208	-179.684	-66.2114	-47.743	175.362	Alpha-R	Alpha-R	Alpha-R	104.244	2.83024	2.90755	LEU	ASP	2.90755	2.83024
4JOK	1.09	A	327	HELIX	HELIX	HELIX	-69.7758	-24.3491	172.985	86.9448	86.702	-16.8817	-171.628	-62.1087	-32.3103	-176.544	Alpha-R	Alpha-L	Alpha-R	148.5	3.02784	3.42093	ARG	GLY	3.42093	3.02784
4JZ5	1.1	A	111	HELIX	HELIX	HELIX	-58.4455	-42.4461	179.679	-75.759	-62.3969	-43.6965	177.476	-72.6121	-38.2807	172.431	Alpha-R	Alpha-R	Alpha-R	101.323	2.87679	2.96382	GLU	GLN	2.96382	2.87679
4JZ5	1.1	A	83	HELIX	HELIX	HELIX	-60.3354	-45.4454	-179.33	-69.9016	-65.3692	-34.0525	175.52	-60.5103	-43.0317	176.525	Alpha-R	Alpha-R	Alpha-R	107.592	2.8935	2.96973	LYS	ARG	2.96973	2.8935
4JZ5	1.1	A	191	N/A	HELIX	SHEET	-168.11	170.554	174.838	59.0246	-70.0317	162.88	173.333	-140.25	163.634	-176.11	Beta	Beta	Beta	89.4203	4.25119	3.13883	THR	SER	3.13883	4.25119
4KEF	1.1	A	62	N/A	SHEET	N/A	-105.772	155.15	169.652	-58.7377	-158.673	179.352	167.214	-149.7	169.943	-173.146	Beta	Beta	Beta	108.891	3.68212	4.21833	ASP	LEU	4.21833	3.68212
4KGD	1.06	B	475	N/A	N/A	N/A	58.4759	33.3625	179.279	-62.3989	-146.245	159.582	153.988	-107.912	-0.828072	-176.814	Alpha-L	Beta	Alpha-R	115.386	2.92448	4.11693	ASN	GLN	4.11693	2.92448
4KGD	1.06	B	79	SHEET	SHEET	SHEET	-142.496	168.103	175.698	62.5467	-149.012	161.547	173.67	-131.359	131.466	176.116	Beta	Beta	Beta	116.045	4.12358	4.13489	VAL	PHE	4.13489	4.12358
4KXV	0.97	A	151	SHEET	SHEET	SHEET	-131.735	122.331	179.682	-179.665	-99.2469	122.204	-178.037	-123.081	131.495	-177.395	Beta	Beta	Beta	126.852	3.98134	3.65035	TYR	LEU	3.65035	3.98134
4KXV	0.97	A	133	HELIX	HELIX	HELIX	-59.7009	-41.775	177.168	-76.8092	-63.1128	-41.7867	176.276	-60.0809	-40.4547	175.522	Alpha-R	Alpha-R	Alpha-R	101.099	2.92439	2.98064	ALA	GLY	2.98064	2.92439
4KXV	0.97	A	225	HELIX	HELIX	HELIX	-54.2407	-45.2612	-175.201	-74.7866	-66.9921	-46.9786	-178.863	-66.0262	-47.7524	178.872	Alpha-R	Alpha-R	Alpha-R	99.1505	2.7755	2.96093	LEU	LYS	2.96093	2.7755
4KXV	0.97	A	42	HELIX	HELIX	HELIX	-65.5281	-30.7858	176.075	-73.0782	-65.5638	-24.8992	-173.67	-70.6161	-46.2532	-171.209	Alpha-R	Alpha-R	Alpha-R	115.09	3.00749	2.98536	CYS	SER	2.98536	3.00749
4KXV	0.97	A	376	HELIX	HELIX	HELIX	-64.5894	-30.4671	-179.611	-68.0131	-81.2614	-16.3047	-178.677	-62.9052	-40.3628	177.415	Alpha-R	Alpha-R	Alpha-R	123.531	3.0461	3.31056	GLY	ALA	3.31056	3.0461
4KXV	0.97	A	206	HELIX	HELIX	HELIX	-61.909	-44.153	-179.386	-67.6169	-66.2657	-36.7989	179.899	-64.7831	-47.6244	179.898	Alpha-R	Alpha-R	Alpha-R	104.232	2.92741	2.99551	ARG	GLU	2.99551	2.92741
4KXV	0.97	A	362	N/A	N/A	SHEET	-101.282	-6.32975	177.803	-66.8751	65.7396	-169.216	-170.77	-72.2523	116.835	-177.183	Alpha-R	PPII-R	Beta	78.9128	3.60911	3.0154	GLU	TYR	3.0154	3.60911
4KXV	0.97	A	468	SHEET	SHEET	SHEET	-94.8254	130.056	177.37	-66.3406	-119.864	131.355	174.693	-86.9552	102.874	178.042	Beta	Beta	Beta	122.772	3.44436	3.9089	ILE	PHE	3.9089	3.44436
4KXV	0.97	A	41	HELIX	HELIX	HELIX	-70.6161	-46.2532	-171.209	-65.0918	-65.5281	-30.7858	176.075	-75.103	-26.9697	171.932	Alpha-R	Alpha-R	Alpha-R	110.448	3.13348	3.00749	SER	CYS	3.00749	3.13348
4KXV	0.97	A	386	SHEET	SHEET	SHEET	-111.731	139.357	-175.626	66.441	-135.065	149.431	171.323	-120.652	112.932	179.683	Beta	Beta	Beta	119.593	3.68736	4.06039	PHE	SER	4.06039	3.68736
4KXV	0.97	A	417	N/A	HELIX	N/A	-76.4118	145.7	168.149	71.0733	75.9164	-177.194	177.14	62.7691	39.5193	-178.943	Beta	PPII-R	Alpha-L	80.6372	3.08413	3.17554	HIS	GLY	3.17554	3.08413
4KXV	0.97	A	413	SHEET	SHEET	SHEET	-124.43	118.07	-179.443	179.054	-110.598	104.639	172.908	-115.775	133.721	170.453	Beta	Beta	Beta	130.741	3.82291	3.77722	LEU	GLY	3.77722	3.82291
4L57	1.08	A	98	SHEET	SHEET	SHEET	-113.124	107.416	-165.583	-175.066	-135.385	143.803	175.687	-95.0848	110.374	-169.666	Beta	Beta	Beta	117.616	3.76019	4.04997	ILE	THR	4.04997	3.76019
4L57	1.08	A	165	HELIX	HELIX	N/A	-148.256	159.417	-175.686	-85.4229	-46.8492	-44.1072	-171.499	-65.5057	135.333	178.887	Beta	Alpha-R	Beta	105.201	4.14844	2.75491	THR	CYS	2.75491	4.14844
4L57	1.08	B	166	HELIX	HELIX	HELIX	-48.692	-40.7171	-171.006	55.4557	-80.6402	-14.1042	179.742	-143.045	163.898	-179.549	Alpha-R	Alpha-R	Beta	122.357	2.77378	3.14881	CYS	HIS	3.14881	2.77378
4L57	1.08	B	108	HELIX	HELIX	N/A	-107.604	-51.082	-165.358	171.275	-63.6871	-56.5585	-177.046	-104.789	15.8674	-176.521	Alpha-R	Alpha-R	Alpha-R	93.9006	3.67168	2.88494	HIS	VAL	2.88494	3.67168
4LF0	1.1	A	332	N/A	N/A	N/A	-151.206	75.0388	-171.276	-176.045	-74.0567	153.642	177.682	-77.5823	-15.7374	178.522	Beta	Beta	Alpha-R	97.0733	4.16672	3.02975	GLU	PRO	3.02975	4.16672
4LF0	1.1	A	166	N/A	HELIX	SHEET	34.1161	-94.7102	-178.397	-167.919	-61.2747	-29.2925	173.734	-126.574	123.684	167.604	PPII-R	Alpha-R	Beta	115.565	2.84923	2.86374	VAL	ASP	2.86374	2.84923
4LF0	1.1	A	91	HELIX	HELIX	HELIX	-60.8266	-42.9427	175.653	-70.712	-64.8169	-49.108	-175.25	-62.8185	-42.3067	179.155	Alpha-R	Alpha-R	Alpha-R	96.6307	2.94002	2.96922	ALA	LYS	2.96922	2.94002
4LF0	1.1	A	178	HELIX	HELIX	HELIX	-63.0806	-48.718	179.103	-66.6003	-60.3196	-40.5021	-179.67	-58.9475	-46.3266	-179.782	Alpha-R	Alpha-R	Alpha-R	102.663	2.94518	2.93869	ASP	ALA	2.93869	2.94518
4LF0	1.1	A	246	N/A	N/A	SHEET	-79.2193	165.256	162.4	-62.9758	-88.6399	-147.938	179.97	-138.082	137.327	169.955	Beta	Beta	Beta	77.5006	3.37978	3.51339	GLU	GLY	3.51339	3.37978
4LF0	1.1	A	139	N/A	N/A	N/A	-66.4918	150.829	7.72918	-60.5707	-78.9056	-26.3701	-171.741	-79.3876	61.9757	178.505	Beta	Alpha-R	Beta	146.245	3.00214	4.44352	TRP	PRO	4.44352	3.00214
4LF0	1.1	A	189	SHEET	SHEET	SHEET	-97.8452	137.511	-172.547	-60.1709	-154.86	150.92	160.754	-108.956	107.537	176.983	Beta	Beta	Beta	120.085	3.52064	4.09123	ARG	GLN	4.09123	3.52064
4LF0	1.1	A	300	N/A	N/A	N/A	-72.0116	120.896	-177.395	179.466	-97.5021	10.238	-168.984	-51.082	142.165	177.958	Beta	Alpha-R	Beta	141.944	3.12102	3.51891	GLU	PRO	3.51891	3.12102
4M51	1.08	A	129	HELIX	HELIX	HELIX	-67.1334	-42.245	178.563	-71.6675	-68.6707	-29.0455	178.135	-62.3046	-41.0473	-179.369	Alpha-R	Alpha-R	Alpha-R	110.909	3.01909	3.02639	ALA	ILE	3.02639	3.01909
4M51	1.08	A	279	HELIX	HELIX	SHEET	-122.422	77.563	-168.803	-61.6628	-64.407	-42.7701	-178.172	-95.6768	122.278	-175.587	Beta	Alpha-R	Beta	105.393	3.93523	2.90572	HIS	PRO	2.90572	3.93523
4M9V	0.97	C	176	SHEET	SHEET	N/A	-95.2812	145.895	179.178	68.6759	-137.818	168.194	-172.481	-62.4812	135.765	-175.279	Beta	Beta	Beta	107.943	3.51499	4.13317	LYS	PHE	4.13317	3.51499
4M9V	0.97	F	173	N/A	N/A	N/A	-110.817	-9.9373	178.878	72.2355	86.4097	120.6	-140.698	-71.5447	-59.3916	-169.198	N/A	N/A	Alpha-R	137.612	3.87034	3.39783	GLU	GLY	3.39783	3.87034
4M9V	0.97	C	145	N/A	N/A	N/A	-138.242	-1.11384	173.626	79.9352	78.527	1.68732	-179.863	-71.7502	-56.8753	-160.862	N/A	Alpha-L	Alpha-R	134.663	4.00712	3.23509	PHE	GLY	3.23509	4.00712
4M9V	0.97	C	170	N/A	N/A	SHEET	-68.8282	125.397	-178.516	177.724	-72.5771	33.6191	-155.051	-125.677	154.488	173.365	Beta	N/A	Beta	117.973	3.11874	3.04049	SER	PRO	3.04049	3.11874
4M9V	0.97	C	142	N/A	N/A	SHEET	-80.6115	133.332	-179.345	178.003	-83.3041	27.5334	-120.122	-149.2	156.211	-179.231	Beta	Alpha-R	Beta	131.236	3.33521	3.33013	PHE	ASN	3.33013	3.33521
4MHP	1.1	A	149	HELIX	HELIX	HELIX	-56.8458	-48.3607	179.969	-73.3097	-64.4761	-37.0731	179.456	-52.1566	-42.6486	177.77	Alpha-R	Alpha-R	Alpha-R	105.845	2.87434	3.01064	PRO	ALA	3.01064	2.87434
4MHP	1.1	A	127	SHEET	SHEET	SHEET	-164.122	179.098	173.553	63.4737	-111.264	144.367	-178.44	-146.186	161.052	173.172	Beta	Beta	Beta	116.23	4.27615	3.77618	ALA	HIS	3.77618	4.27615
4MQ3	1.08	A	98	HELIX	HELIX	HELIX	-69.2753	-40.2652	-178.582	-161.687	-63.6379	-46.1925	-176.607	-61.4824	-45.6865	-177.771	Alpha-R	Alpha-R	Alpha-R	94.7982	2.91036	2.95619	ASP	THR	2.95619	2.91036
4MQ3	1.08	A	67	SHEET	SHEET	SHEET	-99.3976	150.231	173.204	-73.7122	-135.649	162.868	-173.257	-161.198	164.397	167.732	Beta	Beta	Beta	111.424	3.57271	4.06519	ASP	THR	4.06519	3.57271
4MTU	0.97	A	115	SHEET	SHEET	SHEET	-112.556	-18.0916	178.209	-62.8511	-174.093	156.966	170.481	-70.9477	125.099	-178.238	N/A	Beta	Beta	114.475	3.7994	4.18746	LEU	GLY	4.18746	3.7994
4MTU	0.97	A	85	SHEET	SHEET	SHEET	-124.958	152.863	173.178	-61.5176	-114.849	146.863	-174.946	-95.3218	126.75	-175.164	Beta	Beta	Beta	115.758	3.96296	3.83924	THR	LYS	3.83924	3.96296
4MTU	0.97	A	109	SHEET	SHEET	SHEET	-107.34	97.3441	-177.108	-52.4815	-130.949	98.577	13.7614	-80.6161	158.518	166.195	Beta	Beta	Beta	133.972	3.83967	3.95919	ALA	GLU	3.95919	3.83967
4MZC	0.95	A	88	HELIX	HELIX	HELIX	-61.3231	-40.0267	-178.557	-170.772	-65.033	-39.3979	175.268	-102.962	-170.857	179.73	Alpha-R	Alpha-R	Beta	103.243	2.91426	2.91184	GLY	ASP	2.91184	2.91426
4N6X	1.05	A	16	SHEET	SHEET	SHEET	-105.466	107.361	-174.023	-58.9013	-105.37	137.644	168.049	-100.343	117.291	-176.333	Beta	Beta	Beta	118.741	3.63971	3.70455	CYS	LEU	3.70455	3.63971
4N6X	1.05	A	15	SHEET	SHEET	SHEET	-100.343	117.291	-176.333	-58.0993	-105.466	107.361	-174.023	-113.147	111.918	-176.795	Beta	Beta	Beta	138.011	3.54933	3.63971	LEU	CYS	3.63971	3.54933
4OUS	1.05	A	1044	N/A	N/A	N/A	-68.5865	121.236	179.931	175.563	-89.7752	-12.4178	-174.126	-105.181	128.403	178.963	Beta	Alpha-R	Beta	124.187	3.0736	3.43323	THR	PRO	3.43323	3.0736
4PE0	1.08	X	68	N/A	HELIX	N/A	-109.523	114.061	179.623	-176.713	-90.5719	-177.807	-173.918	-138.229	172.542	-179.451	Beta	Beta	Beta	83.6545	3.72389	3.41295	GLU	ASP	3.41295	3.72389
4PE0	1.08	X	84	HELIX	HELIX	HELIX	-64.2711	-42.0257	179.895	-66.9852	-60.3717	-44.4397	-179.813	-61.6318	-42.2276	177.971	Alpha-R	Alpha-R	Alpha-R	99.7688	2.9704	2.89272	ALA	HIS	2.89272	2.9704
4PF3	1.1	A	910	HELIX	HELIX	HELIX	-76.5655	121.866	-179.839	-178.432	-60.409	-22.6535	176.755	-97.695	-6.73716	-178.172	Beta	Alpha-R	Alpha-R	119.113	3.12471	2.90759	LYS	PRO	2.90759	3.12471
4PF3	1.1	A	942	HELIX	HELIX	HELIX	-65.3404	-41.1735	178.223	-167.831	-63.0351	-35.2748	178.362	-70.5132	-37.7081	179.749	Alpha-R	Alpha-R	Alpha-R	107.643	2.96244	2.96762	PHE	PHE	2.96762	2.96244
4PF3	1.1	A	849	HELIX	HELIX	HELIX	-61.1991	-38.5874	177.39	-71.1405	-62.091	-39.1597	176.592	-64.5874	-44.4125	176.534	Alpha-R	Alpha-R	Alpha-R	103.569	2.92524	2.97117	LEU	GLN	2.97117	2.92524
4PLZ	1.05	A	58	N/A	N/A	N/A	-111.604	124.886	170.723	-63.7442	-67.1678	144.123	172.974	-144.649	68.3074	176.475	Beta	Beta	Beta	99.1592	3.84786	3.0184	ASN	LYS	3.0184	3.84786
4PLZ	1.05	A	116	HELIX	N/A	HELIX	-148.919	58.9646	-176.452	54.5931	-64.2717	-17.1095	178.045	-100.623	-31.1123	-176.468	N/A	Alpha-R	Alpha-R	122.528	4.11753	2.94328	ASN	PRO	2.94328	4.11753
4PLZ	1.05	A	259	SHEET	SHEET	SHEET	-144.08	173.72	179.109	67.3095	-86.0311	125.233	-173.793	-86.1702	121.217	179.152	Beta	Beta	Beta	121.343	4.05191	3.33039	ILE	SER	3.33039	4.05191
4PLZ	1.05	A	169	HELIX	HELIX	N/A	-52.1967	127.63	-179.827	172.692	-51.2206	-45.7743	-177.779	-127.6	165.349	173.863	Beta	Alpha-R	Beta	102.426	2.8628	2.77314	VAL	PRO	2.77314	2.8628
4PSS	0.85	A	85	HELIX	N/A	HELIX	-67.6623	-26.5581	-174.813	-65.6752	71.5201	157.964	93.7142	-65.228	-21.5726	173.257	Alpha-R	N/A	Alpha-R	89.0819	3.15751	3.16594	ALA	GLY	3.16594	3.15751
4Q68	1.07	A	58	N/A	N/A	N/A	-84.88	-4.41063	-179.408	-60.5545	-96.7045	-8.07785	-177.917	-134.644	87.9281	-175.791	Alpha-R	Alpha-R	Beta	129.63	3.30373	3.61787	ASN	ASP	3.61787	3.30373
4Q68	1.07	A	63	HELIX	HELIX	HELIX	-64.1406	-32.3224	-177.238	66.1942	-84.1795	-44.9124	179.328	-118.624	-175.63	-171.395	Alpha-R	Alpha-R	Beta	99.4017	2.85529	3.32932	ASP	THR	3.32932	2.85529
4QLP	1.1	B	814	N/A	N/A	N/A	51.8114	42.4551	175.578	-65.6775	75.5969	6.68329	-174.718	-170.095	153.217	172.406	Alpha-L	Alpha-L	Beta	129.951	2.76808	3.23518	GLY	GLY	3.23518	2.76808
4QQS	1.1	A	214	N/A	N/A	N/A	-80.261	133.022	179.295	-178.036	-54.808	-27.497	-176.545	70.8357	178.423	-173.443	Beta	Alpha-R	N/A	117.494	3.24841	2.88127	ASN	TYR	2.88127	3.24841
4QQS	1.1	B	145	HELIX	HELIX	N/A	-52.3586	-28.116	-174.906	62.2301	-57.7171	-31.4936	-177.962	-76.6588	138.399	-179.72	Alpha-R	Alpha-R	Beta	111.965	2.92949	2.84089	ASP	SER	2.84089	2.92949
4QRN	1.07	D	300	HELIX	HELIX	HELIX	-58.1138	-49.5573	178.922	-104.16	-54.2864	-38.4304	178.524	-58.5763	-49.5195	179.384	Alpha-R	Alpha-R	Alpha-R	105.84	2.90165	2.83686	PHE	GLN	2.83686	2.90165
4QRN	1.07	C	118	HELIX	HELIX	HELIX	-65.6988	-32.9721	178.309	-66.367	-73.9432	-24.343	176.862	-66.7431	-41.625	179.543	Alpha-R	Alpha-R	Alpha-R	114.896	2.9882	3.12193	ALA	GLN	3.12193	2.9882
4R2X	0.93	D	62	SHEET	N/A	SHEET	-142.449	129.054	177.453	-176.196	-75.4776	158.067	-179.264	-118.292	119.301	-172.076	Beta	Beta	Beta	94.9891	4.04711	3.13377	ILE	SER	3.13377	4.04711
4R2X	0.93	E	212	SHEET	SHEET	SHEET	-150.013	130.315	177.16	-175.484	-129.634	146.511	-178.26	-153.128	169.053	-175.459	Beta	Beta	Beta	115.877	4.1454	4.02717	ALA	VAL	4.02717	4.1454
4R2X	0.93	C	141	HELIX	HELIX	HELIX	-59.3948	-49.358	-173.366	-73.6319	-68.0851	-34.7563	173.372	-64.1597	-39.7123	176.418	Alpha-R	Alpha-R	Alpha-R	105.006	2.83757	2.98086	ALA	ARG	2.98086	2.83757
4R2X	0.93	A	203	HELIX	HELIX	HELIX	-70.6398	-43.0619	-176.504	-72.4978	-61.7539	-41.6283	-176.535	-62.7566	-42.1704	-177.837	Alpha-R	Alpha-R	Alpha-R	100.824	2.96899	2.85245	MET	ALA	2.85245	2.96899
4R2X	0.93	F	133	HELIX	HELIX	HELIX	-69.042	-39.606	178.035	-67.2624	-63.6137	-41.4352	177.226	-62.4662	-43.0133	-179.101	Alpha-R	Alpha-R	Alpha-R	102.747	3.02728	2.91922	GLU	THR	2.91922	3.02728
4REK	0.74	A	452	N/A	N/A	N/A	-142.622	60.9968	-161.035	-65.8626	-68.3075	137.287	178.806	108.591	-27.9358	177.463	Beta	Beta	Alpha-L	102.573	4.10128	2.972	GLY	VAL	2.972	4.10128
4REK	0.74	A	56	N/A	N/A	N/A	-64.6972	161.595	157.877	-64.4204	-103.2	173.918	-176.779	-111.469	153.387	165.647	Beta	Beta	Beta	101.667	3.12201	3.77784	PHE	GLY	3.77784	3.12201
4REK	0.74	A	282	SHEET	SHEET	SHEET	-161.044	168.813	172.656	63.3925	-89.8794	-45.5521	-178.004	-127.024	163.888	-172.154	Beta	Alpha-R	Beta	103.21	4.2064	3.55997	SER	ARG	3.55997	4.2064
4REK	0.74	A	445	SHEET	N/A	SHEET	-164.784	138.649	179.323	85.8225	-94.6852	-18.0176	-171.942	-128.114	165.09	160.842	Beta	Alpha-R	Beta	121.712	4.1213	3.62828	PHE	TYR	3.62828	4.1213
4RJ2	0.99	C	200	SHEET	SHEET	SHEET	-131.943	155.606	169.615	-61.1434	-110.42	139.709	-178.638	-114.34	133.074	176.277	Beta	Beta	Beta	116.162	4.01024	3.79003	ILE	THR	3.79003	4.01024
4RJ2	0.99	B	110	SHEET	SHEET	SHEET	-71.3039	165.332	176.93	-55.6136	-161.802	157.062	166.892	-141.274	113.778	168.216	Beta	Beta	Beta	116.507	3.24088	4.1705	ALA	THR	4.1705	3.24088
4RJ2	0.99	F	91	SHEET	SHEET	SHEET	-149.883	160.489	175.942	69.518	-101.334	137.982	-178.247	-111.81	158.626	175.778	Beta	Beta	Beta	117.752	4.23473	3.68157	SER	GLY	3.68157	4.23473
4RJ2	0.99	E	69	HELIX	HELIX	HELIX	-67.9339	-25.3328	178.851	69.9676	-66.4624	-37.7112	176.069	-66.0156	-54.368	-176.526	Alpha-R	Alpha-R	Alpha-R	106.777	2.95563	3.00411	SER	SER	3.00411	2.95563
4RXV	1.1	A	101	N/A	N/A	N/A	-60.3304	-33.3353	-178.982	-166.554	-76.3133	-58.6066	-165.198	-160.908	-178.699	-165.325	Alpha-R	Alpha-R	Beta	111.842	2.95058	3.2294	GLU	SER	3.2294	2.95058
4RXV	1.1	A	31	HELIX	HELIX	HELIX	-103.578	-1.32891	-175.061	-66.847	-90.3682	121.029	178.224	-70.6869	-11.8141	176.558	Alpha-R	Beta	Alpha-R	126.826	3.71971	3.43023	HIS	LEU	3.43023	3.71971
4TKB		A	124	SHEET	SHEET	SHEET	-112.625	138.302	176.377	161.107	-122.864	140.264	-149.39	-131.274	116.12	-179.962	Beta	Beta	Beta	117.443	3.80687	3.92155	VAL	THR	3.92155	3.80687
4TXR	1	A	87	HELIX	HELIX	HELIX	-61.5278	-47.1755	177.605	-175.64	-56.4983	-44.1296	179.299	-55.0478	-42.3274	-179.991	Alpha-R	Alpha-R	Alpha-R	102.098	2.89441	2.87684	GLY	ALA	2.87684	2.89441
4TXR	1	A	155	HELIX	HELIX	HELIX	-59.2276	-45.6339	-177.025	-75.2338	-62.0745	-82.0399	153.967	-66.0084	-41.8218	177.653	Alpha-R	N/A	Alpha-R	98.3817	2.87172	2.84949	ASN	LEU	2.84949	2.87172
4TXR	1	A	38	HELIX	HELIX	HELIX	-59.0842	-45.3142	175.203	-71.0543	-63.4034	-36.7759	-178.814	-71.7966	-31.2699	171.405	Alpha-R	Alpha-R	Alpha-R	106.366	2.91959	3.01585	TYR	ARG	3.01585	2.91959
4TXR	1	A	56	HELIX	HELIX	HELIX	-71.4634	-43.7939	-179.203	-71.0444	-65.5754	-37.8437	175.744	-62.4437	-37.6561	-176.734	Alpha-R	Alpha-R	Alpha-R	102.392	3.06083	2.98559	GLU	ARG	2.98559	3.06083
4U9H	0.89	S	191	HELIX	N/A	HELIX	-83.353	137.737	175.18	-178.374	-63.9547	-17.1977	-178.75	-99.2335	0.203565	-166.888	Beta	Alpha-R	Alpha-R	122.793	3.21735	2.99817	GLN	PRO	2.99817	3.21735
4U9H	0.89	L	81	HELIX	HELIX	N/A	-161.636	131.89	175.133	-173.176	-100.423	-4.10045	168.983	-54.6719	-40.4684	-171.274	Beta	Alpha-R	Alpha-R	128.802	4.1883	3.7051	THR	GLY	3.7051	4.1883
4U9H	0.89	S	222	HELIX	HELIX	HELIX	-56.6137	129.772	178.796	-169.968	-98.3705	9.67717	176.741	107.358	4.00295	-172.235	Beta	Alpha-R	Alpha-L	138.683	2.76361	3.60243	GLY	LYS	3.60243	2.76361
4U9H	0.89	L	546	HELIX	HELIX	N/A	-138.939	98.8495	-167.312	-169.53	-83.1621	-30.5303	171.113	-62.3021	144.596	176.772	Beta	Alpha-R	Beta	109.688	4.03963	3.25077	PRO	ILE	3.25077	4.03963
4U9H	0.89	S	150	HELIX	HELIX	HELIX	-133.135	69.1625	-0.723099	-164.903	-89.2589	168.065	174.153	128.45	159.796	-170.033	Beta	Beta	N/A	76.9458	3.99315	4.39893	GLY	PRO	4.39893	3.99315
4U9H	0.89	S	20	HELIX	HELIX	HELIX	-67.0207	-44.6354	175.216	-72.2303	-56.9505	-45.9125	-179.749	-64.7315	-33.1014	175.727	Alpha-R	Alpha-R	Alpha-R	101.487	2.99724	2.82821	GLY	SER	2.82821	2.99724
4U9H	0.89	S	98	HELIX	HELIX	HELIX	-67.4262	-36.1223	177.526	-70.0349	-62.2383	-34.8611	-179.81	-58.7083	-51.6857	-176.676	Alpha-R	Alpha-R	Alpha-R	108.746	2.994	2.98015	ILE	SER	2.98015	2.994
4U9H	0.89	S	114	HELIX	HELIX	HELIX	-61.2064	-53.8821	179.397	-65.0595	-65.2754	-36.2532	-176.711	-54.461	-32.4865	174.695	Alpha-R	Alpha-R	Alpha-R	108.859	2.90532	3.02423	THR	ALA	3.02423	2.90532
4U9H	0.89	S	231	HELIX	HELIX	HELIX	-54.9497	-46.85	-174.626	-48.5896	-70.2709	-22.5897	-174.02	-109.743	23.8971	-172.946	Alpha-R	Alpha-R	Alpha-R	119.724	2.88069	2.97749	ASN	PRO	2.97749	2.88069
4U9H	0.89	L	460	N/A	N/A	N/A	-146.004	153.702	-174.67	47.1039	-116.512	146.602	175.458	-126.569	-12.9802	168.958	Beta	Beta	N/A	115.267	4.09767	3.85216	ILE	ALA	3.85216	4.09767
4U9H	0.89	L	246	HELIX	HELIX	HELIX	-85.852	78.8669	175.03	48.4143	-58.1237	-30.2653	179.675	-108.781	-12.5521	-164.879	Beta	Alpha-R	Alpha-R	112.843	3.36029	2.84646	THR	TYR	2.84646	3.36029
4U9H	0.89	L	510	N/A	N/A	N/A	-99.3344	-175.408	178.98	61.4294	-73.8714	-0.713326	168.459	-64.0601	156.449	177.954	Beta	Alpha-R	Beta	131.646	3.67988	3.15882	ARG	ASP	3.15882	3.67988
4U9H	0.89	S	17	N/A	HELIX	N/A	-105.655	-5.62377	-179.679	79.7028	77.3318	3.69307	172.941	-150.161	164.036	178.044	Alpha-R	Alpha-L	Beta	138.903	3.72843	3.33092	GLU	THR	3.33092	3.72843
4U9H	0.89	S	252	HELIX	HELIX	HELIX	-75.4946	-7.47957	174.312	80.1693	-96.3146	7.63638	-177.102	83.1861	29.2436	-159.49	Alpha-R	Alpha-R	Alpha-L	137.651	3.11391	3.63381	GLY	SER	3.63381	3.11391
4U9H	0.89	S	216	HELIX	HELIX	HELIX	-61.4271	145.1	-176.563	171.691	-97.5066	-31.5437	160.595	-68.8497	163.437	-175.419	Beta	Alpha-R	Beta	140.08	2.92237	3.64575	TRP	LEU	3.64575	2.92237
4U9H	0.89	S	249	HELIX	HELIX	HELIX	-63.302	139.299	177.758	174.003	-103.753	4.41469	173.026	-59.3183	150.997	162.272	Beta	Alpha-R	Beta	134.528	3.09056	3.73595	PRO	ILE	3.73595	3.09056
4U9H	0.89	L	95	HELIX	HELIX	HELIX	-63.018	-49.534	179.881	176.25	-71.2163	-39.4156	172.127	-58.0682	-40.7302	-179.142	Alpha-R	Alpha-R	Alpha-R	101.566	3.00451	3.09792	ARG	VAL	3.09792	3.00451
4UA6	0.79	A	69	HELIX	HELIX	N/A	50.8571	-140.44	-173.109	-55.698	-70.0571	-4.92455	172.75	-75.3013	-34.5077	-170.126	PPII-R	Alpha-R	Alpha-R	129.816	2.79128	3.02713	MET	SER	3.02713	2.79128
4UDX		X	39	HELIX	HELIX	N/A	-64.1731	124.171	178.869	-179.519	-70.2008	-25.1904	175.133	-74.7366	157.401	-179.243	Beta	Alpha-R	Beta	116.542	2.97472	3.13117	GLN	GLY	3.13117	2.97472
4UDX		X	441	SHEET	SHEET	SHEET	-126.002	126.442	170.077	-178.752	-94.1207	116.485	167.13	-126.826	136.168	171.823	Beta	Beta	Beta	129.888	3.98633	3.64069	VAL	LEU	3.64069	3.98633
4UDX		X	48	SHEET	N/A	SHEET	-135.461	132.125	173.956	-177.594	-127.174	31.3758	-177.738	-145.586	138.902	176.715	Beta	N/A	Beta	147.375	4.12458	4.02413	CYS	ARG	4.02413	4.12458
4UDX		X	215	HELIX	HELIX	HELIX	-64.4801	-32.7923	177.23	-165.574	-64.1601	-32.5466	175.829	-61.4962	-43.3104	178.636	Alpha-R	Alpha-R	Alpha-R	108.564	2.95087	2.91268	ARG	SER	2.91268	2.95087
4UDX		X	526	N/A	N/A	N/A	-52.9794	-49.0888	177.567	-150.309	-62.8262	-29.5715	175.977	-75.1634	178.637	173.529	Alpha-R	Alpha-R	Beta	107.899	2.98877	2.83785	SER	VAL	2.83785	2.98877
4UDX		X	295	HELIX	HELIX	HELIX	-78.4872	-29.3406	175.126	-87.1918	-65.8471	-30.1042	169.273	59.7869	-155.387	-165.425	Alpha-R	Alpha-R	PPII-R	103.306	3.04275	2.80303	CYS	THR	2.80303	3.04275
4UDX		X	294	HELIX	HELIX	SHEET	59.7869	-157.815	-166.742	-78.5038	-69.7928	-38.0684	179.941	-127.943	138.373	173.73	PPII-R	Alpha-R	Beta	110.28	2.84646	2.96962	ILE	CYS	2.96962	2.84646
4UDX		X	476	HELIX	HELIX	HELIX	-65.7674	-22.5862	173.759	-70.0341	-69.3364	-46.5313	168.193	58.2195	-143.38	175.65	Alpha-R	Alpha-R	PPII-R	96.8645	3.18504	3.09222	GLY	GLY	3.09222	3.18504
4UDX		X	56	SHEET	SHEET	N/A	-105.711	148.806	174.193	-69.5132	-142.465	163.659	176.031	-73.9222	139.665	173.491	Beta	Beta	Beta	111.286	3.75612	4.09916	PRO	ARG	4.09916	3.75612
4UDX		X	223	HELIX	HELIX	HELIX	-59.7103	-51.349	-175.864	-68.8989	-64.4319	-41.1227	176.732	-61.9856	-42.4513	175.817	Alpha-R	Alpha-R	Alpha-R	102.892	2.91417	2.95668	GLY	TYR	2.95668	2.91417
4UDX		X	201	N/A	N/A	N/A	-114.116	-123.749	-173.999	-62.4905	-69.1209	134.591	-171.304	74.9161	24.1013	177.08	Beta	Beta	Alpha-L	107.878	3.86775	2.97147	GLY	ASP	2.97147	3.86775
4UDX		X	333	N/A	N/A	N/A	73.0143	12.7794	175.713	-61.5077	-91.3645	112.871	175.756	79.1857	132.073	168.554	Alpha-L	Beta	N/A	130.666	3.22151	3.44422	GLN	ILE	3.44422	3.22151
4UDX		X	496	HELIX	HELIX	HELIX	-98.0635	142.807	168.109	-59.3173	-60.2399	162.448	-173.15	-93.0114	-30.2672	-165.531	Beta	Beta	Alpha-R	84.5855	3.44735	2.94735	LEU	GLY	2.94735	3.44735
4UDX		X	344	HELIX	HELIX	HELIX	-79.564	-41.4778	-168.588	-51.6469	-99.1066	-11.3565	179.372	-58.7263	-36.9578	-179.201	Alpha-R	Alpha-R	Alpha-R	122.349	3.4512	3.46145	GLU	THR	3.46145	3.4512
4UDX		X	446	N/A	N/A	N/A	-86.3243	177.847	147.237	-37.9851	-91.814	161.253	-176.685	80.5292	-166.484	-157.614	Beta	Beta	PPII-R	99.6627	3.36133	3.76113	GLY	ASN	3.76113	3.36133
4UDX		X	70	N/A	N/A	N/A	-77.2924	-4.53979	-174.423	60.9921	102.074	1.08055	179.691	-61.1616	-39.1558	178.913	Alpha-R	Alpha-L	Alpha-R	129.875	3.25759	3.70789	ILE	GLY	3.70789	3.25759
4UDX		X	309	SHEET	SHEET	SHEET	-90.4082	-43.5282	174.266	77.4742	-163.625	-175.963	-172.302	-91.1421	123.312	-178.056	Alpha-R	Beta	Beta	109.638	3.27341	4.21065	ALA	THR	4.21065	3.27341
4UDX		X	51	N/A	N/A	N/A	-152.039	172.963	-175.389	80.0061	-82.1321	3.90052	164.673	-77.6956	-2.95494	169.934	Beta	Alpha-R	Alpha-R	136.725	4.11148	3.31593	HIS	LEU	3.31593	4.11148
4UDX		X	47	SHEET	SHEET	N/A	-145.586	138.902	176.715	178.818	-135.461	132.125	173.956	-90.1156	53.5549	175.095	Beta	Beta	N/A	125.174	4.1617	4.12458	LEU	CYS	4.12458	4.1617
4UE8	1.1	A	168	HELIX	HELIX	HELIX	-59.8655	-40.5091	-179.974	-74.2909	-66.8168	-59.3849	-170.829	-69.7755	-36.0776	173.113	Alpha-R	Alpha-R	Alpha-R	89.2043	2.92097	3.03577	LEU	LEU	3.03577	2.92097
4UE8	1.1	A	181	SHEET	SHEET	SHEET	-98.6608	-46.619	-177.39	-63.0952	173.54	-169.665	176.92	-75.2411	132.659	169.821	Alpha-R	N/A	Beta	111.833	3.65833	4.21724	ILE	GLY	4.21724	3.65833
4UE8	1.1	B	78	SHEET	SHEET	SHEET	-64.7466	-19.0778	179.551	69.1773	-97.2257	-2.31183	-177.657	-55.8137	-31.7047	-176.182	Alpha-R	Alpha-R	Alpha-R	130.168	2.98502	3.55438	SER	LEU	3.55438	2.98502
4UHC	1.03	A	124	SHEET	N/A	SHEET	-113.584	128.206	164.132	-167.053	50.3756	60.0955	-171.83	-114.859	110.674	-177.238	Beta	Alpha-L	Beta	89.7712	3.7458	2.67849	LEU	ASP	2.67849	3.7458
4UHC	1.03	A	86	HELIX	HELIX	HELIX	-59.0831	-44.3974	175.731	-68.544	-56.2062	-51.648	178.968	-65.6372	-45.4116	176.18	Alpha-R	Alpha-R	Alpha-R	95.0958	2.8866	2.87045	LEU	ASN	2.87045	2.8866
4UHC	1.03	A	163	HELIX	HELIX	HELIX	-129.607	151.596	177.447	-27.2334	-83.9651	166.054	179.986	-88.7413	-28.6154	-169.473	Beta	Beta	Alpha-R	92.9385	3.99639	3.32281	LEU	CYS	3.32281	3.99639
4UHC	1.03	A	212	N/A	N/A	N/A	-131.629	155.155	171.251	59.2702	-51.9447	143.456	-179.044	-126.355	17.6447	175.821	Beta	Beta	N/A	92.8163	3.97936	2.84308	SER	PRO	2.84308	3.97936
4UHC	1.03	A	50	HELIX	N/A	HELIX	-70.3899	-4.04913	169.049	66.4862	-72.1945	-19.1117	-172.135	-75.5893	-14.6309	-176.983	Alpha-R	Alpha-R	Alpha-R	119.79	3.1185	3.20369	LEU	ASP	3.20369	3.1185
4UHC	1.03	A	164	HELIX	HELIX	HELIX	-83.9651	166.054	179.986	75.4687	-54.3921	-42.1088	179.778	-134.231	156.916	-177.557	Beta	Alpha-R	Beta	105.831	3.32281	2.90349	CYS	GLU	2.90349	3.32281
4W7K	1.05	A	299	N/A	N/A	N/A	-152.6	131.461	175.066	-176.345	-59.3936	148.11	173.745	-91.33	-44.9918	178.226	Beta	Beta	Alpha-R	93.7902	4.16425	2.91234	HIS	PRO	2.91234	4.16425
4WES	1.08	B	49	HELIX	HELIX	HELIX	-55.3385	-46.3756	-178.297	-176.646	-65.0064	-42.8066	177.1	-59.4301	-54.1184	-177.219	Alpha-R	Alpha-R	Alpha-R	97.2527	2.81283	2.90131	CYS	SER	2.90131	2.81283
4WES	1.08	A	58	HELIX	HELIX	HELIX	-88.0852	-60.6998	-178.056	-174.721	-78.8476	-51.7064	-173.952	-63.7587	-31.7073	-177.845	Alpha-R	Alpha-R	Alpha-R	97.8994	3.38856	3.21715	GLY	LYS	3.21715	3.38856
4WES	1.08	C	145	HELIX	HELIX	N/A	-35.9966	-54.3772	-172.191	-73.6102	-73.7294	-18.0508	-165.394	-128.803	174.317	-176.02	Alpha-R	Alpha-R	Beta	122.009	2.69483	3.08387	THR	PRO	3.08387	2.69483
4WES	1.08	C	302	HELIX	HELIX	HELIX	-66.3963	-41.6139	-177.776	-70.2743	-80.2837	-30.2303	176.374	-65.975	-36.1081	179.495	Alpha-R	Alpha-R	Alpha-R	110.37	2.97179	3.25473	LYS	PHE	3.25473	2.97179
4WES	1.08	D	48	HELIX	HELIX	HELIX	-56.6243	-55.4947	-175.88	-58.0967	-56.8026	-46.2794	-179.424	-57.2988	-40.6251	178.168	Alpha-R	Alpha-R	Alpha-R	101.69	2.89847	2.80058	GLY	CYS	2.80058	2.89847
4WES	1.08	B	257	SHEET	SHEET	HELIX	-123.026	-1.12928	177.466	-57.463	65.6084	25.5783	173.041	-74.184	-42.3869	-165.287	N/A	Alpha-L	Alpha-R	119.367	3.89153	3.10342	LYS	LYS	3.10342	3.89153
4WES	1.08	C	340	SHEET	SHEET	SHEET	-122.911	149.622	179.304	-53.6834	-132.24	123.97	176.12	-139.045	155.374	167.106	Beta	Beta	Beta	128.073	3.98871	4.02169	ALA	LEU	4.02169	3.98871
4WES	1.08	A	79	HELIX	HELIX	HELIX	-47.2966	-38.9059	176.511	-47.1748	-73.6203	-54.5049	-176.899	-62.8273	-44.6353	175.69	Alpha-R	Alpha-R	Alpha-R	92.7308	2.6685	3.20258	GLY	SER	3.20258	2.6685
4WES	1.08	B	106	SHEET	SHEET	HELIX	-56.4778	-28.853	-179.231	48.69	-68.2395	-55.1326	-177.256	-129.396	174.317	173.33	Alpha-R	Alpha-R	Beta	91.9432	2.83284	3.02479	THR	LEU	3.02479	2.83284
4WES	1.08	B	23	HELIX	HELIX	HELIX	-85.4535	164.479	-176.228	54.67	-47.7676	-48.4778	-162.484	-130.335	-172.024	-171.212	Beta	Alpha-R	Beta	107.822	3.32807	2.83196	THR	GLN	2.83196	3.32807
4WES	1.08	A	174	SHEET	SHEET	SHEET	-105.452	39.3979	173.372	55.0224	-47.6731	138.419	-166.692	-89.2447	71.1941	-176.957	N/A	Beta	Beta	93.4476	3.76053	2.71578	SER	GLU	2.71578	3.76053
4WES	1.08	B	449	HELIX	HELIX	HELIX	-66.3648	156.514	172.344	64.2772	-64.886	160.34	179.651	-99.8211	-14.9459	-179.167	Beta	Beta	Alpha-R	89.4935	2.93789	2.98495	GLU	THR	2.98495	2.93789
4WES	1.08	A	284	HELIX	HELIX	SHEET	-121.744	163.328	168.632	64.593	-149.098	105.659	179.418	-65.8091	133.224	175.427	Beta	Beta	Beta	130.835	3.92025	4.12658	LYS	ASN	4.12658	3.92025
4WES	1.08	C	53	HELIX	HELIX	HELIX	-119.068	174.345	-178.394	67.3319	-64.9266	-33.5762	178.212	-109.559	-155.482	-169.363	Beta	Alpha-R	Beta	111.629	3.85668	2.96391	GLY	ALA	2.96391	3.85668
4WES	1.08	C	262	SHEET	SHEET	SHEET	-88.5624	103.371	178.972	175.458	-62.4331	-48.6724	-170.741	-83.4585	-64.4204	171.329	Beta	Alpha-R	Alpha-R	98.6951	3.41626	2.93375	GLN	HIS	2.93375	3.41626
4WES	1.08	D	38	SHEET	SHEET	N/A	-108.575	130.68	167.09	176.406	-100.919	116.167	170.662	61.6954	34.1574	177.929	Beta	Beta	Alpha-L	133.882	3.72163	3.67132	ASN	LEU	3.67132	3.72163
4WPG	1.1	A	89	HELIX	HELIX	HELIX	-63.306	-42.7338	177.736	-71.9493	-62.7814	-39.3161	179.934	-63.8725	-43.0374	178.599	Alpha-R	Alpha-R	Alpha-R	100.311	2.91558	2.9126	ALA	GLY	2.9126	2.91558
4WPG	1.1	A	196	HELIX	HELIX	HELIX	-70.6574	-28.5611	178.478	-66.5576	-65.5022	-44.8384	179.659	-52.3383	-49.1962	-179.205	Alpha-R	Alpha-R	Alpha-R	101.669	3.11545	2.98657	MET	TYR	2.98657	3.11545
4WPG	1.1	A	57	N/A	N/A	SHEET	-107.766	7.85232	-178.633	-53.9903	-87.6182	130.794	176.642	-91.3773	101.059	-176.98	Alpha-R	Beta	Beta	113.025	3.73474	3.35075	HIS	ALA	3.35075	3.73474
4WUI	1.09	A	202	N/A	N/A	N/A	-132.824	71.9686	-177.335	-173.802	-68.8342	150.919	-177.987	-87.7659	-27.5447	-179.835	Beta	Beta	Alpha-R	91.4711	4.01867	2.99514	SER	PRO	2.99514	4.01867
4WUI	1.09	A	6	N/A	N/A	SHEET	-104.193	151.381	173.228	-160.688	74.9586	42.0137	175.518	-105.127	120.397	-171.951	Beta	Alpha-L	Beta	102.81	3.67639	3.12194	VAL	GLY	3.12194	3.67639
4WUI	1.09	A	51	N/A	N/A	N/A	-69.4314	-15.5765	-174.807	35.5368	-80.7228	0.0890886	-178.995	-81.9341	-179.548	-170.667	Alpha-R	Alpha-R	Beta	135.616	3.0751	3.24553	ASP	THR	3.24553	3.0751
4WWF	1.1	A	123	HELIX	HELIX	HELIX	-66.5851	-41.7392	178.914	-67.7319	-56.8148	-36.7705	179.046	-69.1207	-31.1769	173.516	Alpha-R	Alpha-R	Alpha-R	106.409	2.98623	2.83283	GLU	ARG	2.83283	2.98623
4WX4	1.03	A	126	HELIX	HELIX	HELIX	-59.2204	-43.1619	176.777	-71.3745	-60.0735	-43.9054	179.61	-60.4114	-37.2807	174.924	Alpha-R	Alpha-R	Alpha-R	101.338	2.93392	2.93802	PHE	CYS	2.93802	2.93392
4WX4	1.03	A	127	HELIX	HELIX	HELIX	-60.0735	-43.9054	179.61	-69.0521	-61.5287	-44.468	174.798	-59.2204	-43.1619	176.777	Alpha-R	Alpha-R	Alpha-R	98.8143	2.93802	2.94819	CYS	MET	2.94819	2.93802
4WX4	1.03	A	17	HELIX	HELIX	N/A	-96.5597	-5.51895	-173.944	-57.9139	-48.4755	-46.4927	-176.127	84.0771	16.9305	-177.84	Alpha-R	Alpha-R	Alpha-L	103.245	3.49874	2.83168	GLY	GLY	2.83168	3.49874
4WX4	1.03	A	122	HELIX	HELIX	HELIX	-51.297	-45.169	-177.418	57.3814	-64.6031	-35.4345	176.627	-94.6414	8.19775	-174.929	Alpha-R	Alpha-R	Alpha-R	106.391	2.74213	2.93755	ALA	GLY	2.93755	2.74213
4WX4	1.03	A	40	SHEET	SHEET	SHEET	-157.531	167.787	-179.064	60.3961	-156.851	158.162	166.289	-147.374	154.354	178.167	Beta	Beta	Beta	112.973	4.17772	4.20508	ALA	ALA	4.20508	4.17772
4WX4	1.03	A	67	SHEET	SHEET	SHEET	-100.018	128.173	173.588	179.047	-100.95	131.879	168.922	-113.945	127.948	169.197	Beta	Beta	Beta	123.143	3.70332	3.63906	THR	TYR	3.63906	3.70332
4X2R	1.05	A	158	N/A	N/A	N/A	-57.037	134.869	-173	-174.862	-95.5373	-8.98376	-176.953	85.798	24.2542	179.436	Beta	Alpha-R	Alpha-L	125.122	2.783	3.49546	GLY	ARG	3.49546	2.783
4XOT	1.06	A	593	N/A	SHEET	N/A	-92.1944	112.237	170.461	-173.929	-69.0747	146.031	177.555	-69.3472	-14.7189	-178.554	Beta	Beta	Alpha-R	98.9976	3.46584	3.04798	SER	GLN	3.04798	3.46584
4XOT	1.06	A	369	N/A	N/A	N/A	-119.457	146.704	179.978	-172.872	-77.5479	-44.5147	-170.374	-95.1964	136.864	174.466	Beta	Alpha-R	Beta	98.4821	3.93119	3.18257	ALA	SER	3.18257	3.93119
4XOT	1.06	A	389	N/A	N/A	SHEET	-68.3334	-49.2664	-167.005	-171.596	-132.824	151.927	177.116	-93.7702	158.137	167.917	Alpha-R	Beta	Beta	117.161	3.13639	3.96656	TYR	ARG	3.96656	3.13639
4XOT	1.06	A	511	SHEET	SHEET	N/A	-158.473	133.923	-175.661	-170.261	-116.577	128.403	176.513	171.414	143.45	169.708	Beta	Beta	N/A	125.897	4.20825	3.84966	GLY	THR	3.84966	4.20825
4XOT	1.06	A	355	N/A	SHEET	N/A	-109.727	166.566	178.943	-70.9959	-125.573	127.832	-178.57	56.053	46.4864	177.413	Beta	Beta	Alpha-L	122.838	3.74751	4.01023	SER	TYR	4.01023	3.74751
4XOT	1.06	A	326	N/A	SHEET	N/A	-97.9328	158.582	174.936	-69.1449	-117.997	139.657	-179.325	56.009	33.1124	173.283	Beta	Beta	Alpha-L	118.027	3.54482	3.88984	LYS	ARG	3.88984	3.54482
4XOT	1.06	A	321	N/A	SHEET	N/A	-115.487	138.478	-170.159	-65.1957	-143.085	150.69	171.625	57.0698	51.9687	173.411	Beta	Beta	Alpha-L	120.116	3.81379	4.04831	ASN	TYR	4.04831	3.81379
4XOT	1.06	A	294	SHEET	SHEET	N/A	-120.128	149.445	-178.916	-61.4221	-154.97	157.184	168.985	60.4663	55.7054	176.887	Beta	Beta	Alpha-L	116.612	3.93764	4.12039	ASN	SER	4.12039	3.93764
4XOT	1.06	A	586	N/A	SHEET	N/A	-72.1369	-41.3705	-179.961	-58.0624	-147.4	135.717	-178.702	-156.258	160.896	169.331	Alpha-R	Beta	Beta	118.181	3.2058	4.13537	SER	ILE	4.13537	3.2058
4XOT	1.06	A	347	N/A	N/A	N/A	-144.853	153.321	-178.072	47.689	-75.0715	170.342	173.506	-117.151	28.7162	170.743	Beta	Beta	N/A	86.4141	4.15655	3.16441	ASN	PRO	3.16441	4.15655
4XOT	1.06	A	520	N/A	N/A	SHEET	-158.716	-176.068	-172.017	58.0431	-70.2424	-51.8992	-177.569	-125.757	86.663	-171.934	Beta	Alpha-R	Beta	96.3895	4.18473	3.02336	ASP	ARG	3.02336	4.18473
4XOT	1.06	A	578	N/A	N/A	N/A	-165.311	168.421	179.242	62.4897	-82.0216	145.357	161.745	-129.674	10.4928	171.331	Beta	Beta	N/A	104.084	4.24592	3.20579	SER	GLU	3.20579	4.24592
4XOT	1.06	A	157	N/A	N/A	N/A	-143.743	158.213	179.208	64.9693	-81.2736	176.764	-177.762	-93.0389	71.8188	-168.34	Beta	Beta	Beta	80.9934	4.10653	3.33212	HIS	ASP	3.33212	4.10653
4XOT	1.06	A	261	SHEET	SHEET	N/A	-122.581	116.107	-174.885	176.962	-124.345	131.798	176.925	62.7558	47.3113	-178.341	Beta	Beta	Alpha-L	123.895	3.8674	3.90891	ASN	HIS	3.90891	3.8674
4XPX	1.03	A	128	HELIX	HELIX	HELIX	-69.1802	-46.0218	-171.806	-179.982	-84.3895	-19.7163	175.253	-58.6511	-42.3338	-176.081	Alpha-R	Alpha-R	Alpha-R	113.332	3.05682	3.22483	PRO	LEU	3.22483	3.05682
4XPX	1.03	A	88	HELIX	HELIX	HELIX	-63.4647	-44.6073	177.085	-69.5312	-61.5768	-39.2488	177.294	-63.4951	-45.794	-178.431	Alpha-R	Alpha-R	Alpha-R	102.805	3.03139	2.95952	VAL	ALA	2.95952	3.03139
4Y9V	0.9	A	417	N/A	N/A	N/A	-88.892	125.482	-173.505	-138.747	-146.76	155.324	178.926	-56.5317	151.611	177.296	Beta	Beta	Beta	117.209	3.41361	4.07869	PRO	ARG	4.07869	3.41361
4Y9V	0.9	A	477	N/A	SHEET	N/A	-104.228	-38.0635	-171.919	-73.2746	-132.452	129.199	-177.497	94.8353	155.02	176.855	Alpha-R	Beta	N/A	124.088	3.74262	3.99919	GLY	VAL	3.99919	3.74262
4Y9V	0.9	A	414	N/A	N/A	N/A	-80.282	77.9236	-176.523	-72.8646	-70.5907	162.535	168.088	89.5535	-2.71345	179.299	Beta	Beta	Alpha-L	88.8517	3.29141	3.14812	GLY	VAL	3.14812	3.29141
4Y9V	0.9	A	467	N/A	SHEET	N/A	-101.097	153.799	167.858	-70.4356	-97.1761	114.549	-173.747	55.9412	30.0225	-177.244	Beta	Beta	Alpha-L	133.915	3.60321	3.63244	ASN	ASP	3.63244	3.60321
4Y9V	0.9	A	359	N/A	N/A	N/A	-106.718	155.792	-165.404	-69.5156	-141.214	161.759	-157.205	52.1917	43.8172	177.827	Beta	Beta	Alpha-L	130.123	3.70509	4.05782	ARG	PHE	4.05782	3.70509
4Y9V	0.9	A	387	N/A	N/A	N/A	-114.247	161.197	-178.186	-68.0597	-139.215	175.811	-157.269	57.77	50.8557	-177.382	Beta	Beta	Alpha-L	125.154	3.82551	4.05537	ASN	GLN	4.05537	3.82551
4Y9V	0.9	A	450	N/A	SHEET	N/A	-111.405	163.605	172.988	-64.7048	-120.56	137.012	178.784	57.8494	39.4075	176.48	Beta	Beta	Alpha-L	120.314	3.78471	3.91575	HIS	THR	3.91575	3.78471
4Y9V	0.9	A	527	SHEET	SHEET	SHEET	-145.703	129.448	-174.422	64.3208	-107.621	114.67	-175.906	111.609	-170.27	-178.652	Beta	Beta	N/A	130.702	4.04189	3.73186	GLY	ILE	3.73186	4.04189
4Y9V	0.9	A	565	SHEET	N/A	SHEET	-146.121	124.538	-178.117	171.511	-100.628	19.7905	178.127	-107.137	155.624	178.789	Beta	Alpha-R	Beta	144.491	4.10047	3.64652	SER	ASP	3.64652	4.10047
4Y9V	0.9	A	258	SHEET	N/A	SHEET	-95.402	122.742	-176.479	179.874	-80.3161	-7.5497	-178.978	-146.337	130.239	174.063	Beta	Alpha-R	Beta	127.798	3.56623	3.24253	TYR	THR	3.24253	3.56623
4YAA	1.05	A	403	N/A	N/A	SHEET	-115.267	-130.747	174.527	46.1405	-82.0711	-53.8806	-178.291	-148.982	152.906	169.787	Beta	Alpha-R	Beta	93.8378	3.90195	3.33274	HIS	ARG	3.33274	3.90195
4YAA	1.05	A	259	SHEET	N/A	SHEET	-143.784	167.395	168.636	62.7362	-77.0822	163.352	169.275	-112.819	134.501	-178.677	Beta	Beta	Beta	94.922	4.04987	3.26152	ALA	GLN	3.26152	4.04987
4YAA	1.05	A	418	HELIX	HELIX	HELIX	-66.1647	-32.5701	176.863	89.4293	-76.1289	-16.3842	176.409	-63.5154	-40.4938	-179.797	Alpha-R	Alpha-R	Alpha-R	119.126	2.92607	3.20037	MET	MET	3.20037	2.92607
4YAA	1.05	A	221	N/A	N/A	N/A	-72.4274	-34.2346	-178.565	172.883	-148.431	-133.896	-177.312	-58.4802	141.121	-177.775	Alpha-R	Beta	Beta	100.964	3.0962	4.09993	ALA	GLY	4.09993	3.0962
4YAA	1.05	A	234	N/A	N/A	N/A	-116.749	114.194	-179.934	173.315	-52.6315	127.301	-172.327	-108.452	175.706	-169.858	Beta	Beta	Beta	104.471	3.80451	2.78277	GLN	ARG	2.78277	3.80451
4YMY	1	A	96	SHEET	N/A	SHEET	-118.034	148.076	178.387	-172.94	-64.1858	-20.543	174.739	-112.611	141.642	-174.191	Beta	Alpha-R	Beta	121.607	3.82833	2.99324	ALA	SER	2.99324	3.82833
4YNH	1	A	256	HELIX	HELIX	HELIX	-61.086	-45.7853	176.695	-177.959	-62.5902	-40.7409	-179.247	-61.3494	-46.4638	-178.192	Alpha-R	Alpha-R	Alpha-R	102.338	2.9351	2.98629	GLU	ASP	2.98629	2.9351
4YPO	1	B	146	SHEET	SHEET	N/A	-123.451	154.904	164.546	-69.6868	-97.7465	-96.0615	-106.495	-55.7435	140.728	179.358	Beta	N/A	Beta	112.045	3.96353	3.67122	PRO	LEU	3.67122	3.96353
4YPO	1	B	197	N/A	HELIX	N/A	-120.208	-7.4318	175.844	-60.8936	-114.87	-73.1807	-169.412	-69.0609	-46.1993	-169.437	N/A	N/A	Alpha-R	93.9095	3.90062	3.86318	LEU	GLY	3.86318	3.90062
4YSI	1.02	A	132	SHEET	SHEET	SHEET	-153.601	122.084	174.523	-179.243	-87.5548	133.329	176.802	-155.683	153.949	177.765	Beta	Beta	Beta	117.902	4.16329	3.3989	SER	HIS	3.3989	4.16329
4YSI	1.02	A	90	SHEET	SHEET	N/A	-110.418	126.706	-175.502	174.443	-91.9424	124.492	177.359	-79.1022	144.27	166.043	Beta	Beta	Beta	124.967	3.8634	3.41524	PRO	PHE	3.41524	3.8634
4YSI	1.02	A	121	SHEET	N/A	SHEET	-125.056	126.916	163.552	179.429	54.008	38.4874	-170.454	-115.411	140.411	177.764	Beta	Alpha-L	Beta	112.538	3.9616	2.84635	GLN	ASN	2.84635	3.9616
4ZA9	1.01	A	339	HELIX	HELIX	HELIX	-60.8824	-47.5654	-179.073	-71.6874	-62.297	-36.6718	178.814	-60.0569	-42.5614	177.547	Alpha-R	Alpha-R	Alpha-R	101.495	2.87243	2.94228	LEU	GLN	2.94228	2.87243
4ZA9	1.01	A	250	N/A	N/A	SHEET	-56.5793	159.219	176.268	-69.2787	-78.9985	-39.0978	-170.546	-70.6752	142.862	167.146	Beta	Alpha-R	Beta	106.787	2.91563	3.23094	LYS	ASP	3.23094	2.91563
4ZA9	1.01	A	44	HELIX	HELIX	HELIX	-65.9672	-35.973	-179.26	-68.4764	-73.9735	-17.5736	-176.629	-53.8073	-49.4883	-176.283	Alpha-R	Alpha-R	Alpha-R	122.764	2.99105	3.15927	VAL	GLU	3.15927	2.99105
4ZA9	1.01	A	316	N/A	N/A	N/A	-86.9905	155.422	-178.712	55.112	164.137	-131.493	175.761	-91.7893	82.9629	-166.475	Beta	N/A	Beta	121.149	3.30244	4.18604	SER	GLY	4.18604	3.30244
4ZA9	1.01	A	122	HELIX	HELIX	HELIX	-63.2364	-10.0461	179.011	74.433	-99.8335	6.19833	-177.36	-55.349	-30.1114	178.338	Alpha-R	Alpha-R	Alpha-R	139.256	3.00201	3.66823	PRO	LYS	3.66823	3.00201
4ZA9	1.01	A	9	HELIX	HELIX	HELIX	-157.047	115.286	-176.013	174.754	-57.7643	-40.3542	-178.951	-109.495	-1.08806	-173.46	Beta	Alpha-R	Alpha-R	105.433	4.15795	2.90649	LEU	PHE	2.90649	4.15795
4ZA9	1.01	A	422	HELIX	N/A	HELIX	-109.691	107.751	177.292	177.977	-72.2964	120.686	178.948	-117.509	-13.2603	-179.232	Beta	Beta	N/A	121.649	3.77466	3.08919	ARG	ARG	3.08919	3.77466
5A8C	0.97	A	306	SHEET	SHEET	SHEET	-137.686	161.109	175.372	-62.4432	-144.847	139.287	172.61	-66.1448	150.834	176.555	Beta	Beta	Beta	120.624	4.13233	4.1107	VAL	ILE	4.1107	4.13233
5A8C	0.97	A	57	SHEET	SHEET	SHEET	-137.597	149.253	158.013	-61.0403	-52.1006	127.653	171.71	-111.65	137.52	-172.572	Beta	Beta	Beta	106.228	4.00761	2.87738	TYR	SER	2.87738	4.00761
5A8C	0.97	A	77	SHEET	SHEET	SHEET	-130.989	134.287	171.156	176.414	-127.784	159.693	177.225	-91.5988	146.366	173.166	Beta	Beta	Beta	110.242	3.97455	4.04885	THR	ILE	4.04885	3.97455
5AE0	1.04	A	314	SHEET	N/A	SHEET	-161.644	139.784	171.241	-151.677	-68.4529	161.691	-164.338	-169.579	-178.398	-168.279	Beta	Beta	Beta	87.9632	4.08047	3.03489	GLY	ALA	3.03489	4.08047
5AE0	1.04	A	236	N/A	HELIX	SHEET	-109.593	-27.7652	-175.889	-69.853	48.4	47.3073	173.296	-78.3859	121.047	-169.922	Alpha-R	Alpha-L	Beta	103.389	3.80025	2.76343	PHE	ASP	2.76343	3.80025
5AE0	1.04	A	231	SHEET	SHEET	SHEET	-121.991	108.093	-179.94	174.533	-70.9797	-9.73417	168.105	-150.971	161.935	173.354	Beta	Alpha-R	Beta	104.599	3.95326	3.13516	HIS	THR	3.13516	3.95326
5AKR	0.87	A	136	N/A	N/A	SHEET	-68.6126	149.736	-179.026	-178.237	-158.867	70.5439	-178.571	-161.213	157.412	168.809	Beta	Beta	Beta	134.507	3.13111	4.19457	HIS	ALA	4.19457	3.13111
5AL6	0.8	A	218	HELIX	HELIX	HELIX	-66.9143	-32.5292	173.013	-70.7312	-62.7346	-40.3008	175.931	-61.1088	-45.7212	-178.526	Alpha-R	Alpha-R	Alpha-R	101.86	3.00186	2.96317	LEU	GLU	2.96317	3.00186
5AOT	1.02	A	463	N/A	N/A	SHEET	-71.6214	144.206	176.778	-68.4575	-81.4614	-172.852	-176.646	-109.747	143.67	171.476	Beta	Beta	Beta	76.4107	3.13422	3.25476	SER	ASP	3.25476	3.13422
5AOT	1.02	A	445	SHEET	SHEET	SHEET	-149.693	169.048	155.331	69.7978	-105.658	110.73	-178.349	179.747	-153.403	176.722	Beta	Beta	N/A	130.432	4.08692	3.85488	GLY	ILE	3.85488	4.08692
5B8D	1.05	A	1183	N/A	N/A	N/A	-104.935	119.92	-179.94	-179.287	-69.2851	-26.3417	177.008	-111.806	136.909	170.964	Beta	Alpha-R	Beta	117.562	3.78099	3.14593	TRP	TYR	3.14593	3.78099
5B8D	1.05	A	1145	N/A	N/A	N/A	-78.4758	128.249	-177.394	-178.343	-82.122	1.03171	169.79	-113.14	136.299	178.377	Beta	Alpha-R	Beta	132.784	3.24975	3.34014	VAL	LEU	3.34014	3.24975
5B8D	1.05	A	1120	N/A	N/A	HELIX	-104.841	167.15	-179.074	-64.9577	-60.6413	142.282	179.573	-75.1266	122.573	-171.058	Beta	Beta	Beta	96.5203	3.6618	2.935	VAL	PRO	2.935	3.6618
5B8D	1.05	A	1186	N/A	N/A	N/A	-74.1248	-18.5317	-175.072	-62.2794	52.7268	52.5981	-176.518	-76.0706	-51.5028	-179.427	Alpha-R	Alpha-L	Alpha-R	95.299	3.23023	2.87516	TYR	GLN	2.87516	3.23023
5B8D	1.05	A	1153	N/A	N/A	N/A	-77.6731	158.113	-178.267	66.236	-76.7935	172.258	-172.389	-145.154	155.408	-173.209	Beta	Beta	Beta	85.9568	3.26893	3.29191	TYR	GLY	3.29191	3.26893
5B8D	1.05	A	1136	N/A	N/A	N/A	-98.4273	-8.45834	178.421	68.4459	77.3117	4.14952	-179.828	-95.943	-62.3426	-172.001	Alpha-R	Alpha-L	Alpha-R	134.077	3.66423	3.24876	ASP	GLY	3.24876	3.66423
5B8D	1.05	A	1148	N/A	N/A	N/A	-121.569	3.26173	168.431	80.0022	65.7703	22.5439	165.97	-93.5774	-53.1064	-175.32	N/A	Alpha-L	Alpha-R	126.118	3.88548	3.06496	SER	TYR	3.06496	3.88548
5B8D	1.05	A	1113	N/A	N/A	N/A	-147.981	161.929	-175.33	94.5389	-73.0586	-0.138098	-179.625	-172.578	155.161	164.427	Beta	Alpha-R	Beta	134.349	4.15433	3.15755	TRP	PRO	3.15755	4.15433
5B8D	1.05	A	1133	N/A	N/A	N/A	-58.7568	130.325	179.37	177.697	-64.9164	-117.041	122.047	-76.9855	165.317	172.895	Beta	N/A	Beta	122.847	2.96886	3.11286	PRO	GLY	3.11286	2.96886
5BR4	0.91	A	104	HELIX	HELIX	HELIX	-61.0899	-45.0102	176.797	-167.427	-57.2358	-47.5141	-178.925	-58.9332	-42.3538	-179.648	Alpha-R	Alpha-R	Alpha-R	100.935	2.94515	2.92215	THR	LYS	2.92215	2.94515
5BR4	0.91	B	185	N/A	HELIX	N/A	-53.0388	134.147	172.88	-72.0359	-58.8244	154.627	177.819	-76.3401	-9.58353	175.07	Beta	Beta	Alpha-R	91.023	2.7564	2.76868	GLY	PRO	2.76868	2.7564
5BR4	0.91	A	362	HELIX	HELIX	HELIX	-63.101	-35.1033	-179.618	-63.6792	-56.4639	-30.6518	179.934	-62.8421	-31.4538	-178.441	Alpha-R	Alpha-R	Alpha-R	111.811	2.88111	2.93485	VAL	THR	2.93485	2.88111
5BR4	0.91	B	165	SHEET	SHEET	SHEET	-106.677	129.561	-174.072	-56.3691	-123.38	120.97	-171.492	-104.974	127.627	175.906	Beta	Beta	Beta	130.387	3.73008	3.89803	VAL	VAL	3.89803	3.73008
5BR4	0.91	B	45	HELIX	HELIX	HELIX	-83.4689	3.75636	174.213	79.7377	87.6395	1.1463	-176.356	-59.3198	-40.8515	-173.713	Alpha-R	Alpha-L	Alpha-R	130.054	3.19995	3.42326	GLN	GLY	3.42326	3.19995
5BT3	1.05	A	1142	N/A	HELIX	HELIX	-54.8663	-49.7577	179.766	-173.233	-60.0969	-43.3308	178.645	-65.598	-40.9108	175.212	Alpha-R	Alpha-R	Alpha-R	100.47	2.85938	2.88648	TYR	SER	2.88648	2.85938
5D8V	0.48	A	46	HELIX	N/A	HELIX	-103.337	140.008	178.187	-177.99	-59.4493	-26.0621	-176.841	-107.138	25.7978	178.937	Beta	Alpha-R	Alpha-R	119.95	3.68194	2.99167	ASN	GLN	2.99167	3.68194
5D8V	0.48	A	43	HELIX	HELIX	HELIX	-58.0656	-35.1911	-175.213	-63.3212	-58.2253	-29.6443	-179.602	-160.561	174.327	-170.991	Alpha-R	Alpha-R	Beta	114.943	2.7713	2.81999	HIS	ALA	2.81999	2.7713
5D8V	0.48	A	75	N/A	N/A	N/A	-146.442	171.814	-172.879	83.2138	-72.3444	-8.61738	170.741	-163.553	151.102	163.661	Beta	Alpha-R	Beta	127.491	4.19155	3.11086	TRP	ALA	3.11086	4.19155
5D8V	0.48	A	61	SHEET	N/A	SHEET	-133.792	129.706	-177.003	172.675	-57.2566	-33.263	-176.477	-74.3156	160.033	166.571	Beta	Alpha-R	Beta	111.521	4.07785	2.74213	GLY	GLN	2.74213	4.07785
5DGJ	1	A	83	SHEET	SHEET	SHEET	-100.809	161.63	165.481	-71.7005	-109.31	130.627	171.215	-94.8079	115.364	176.019	Beta	Beta	Beta	122.62	3.6295	3.8251	VAL	SER	3.8251	3.6295
5DGJ	1	A	169	SHEET	SHEET	SHEET	-104.177	140.459	167.791	57.3069	-72.8964	145.501	-177.5	-134.301	131.076	166.007	Beta	Beta	Beta	103.874	3.70416	3.19152	VAL	ALA	3.19152	3.70416
5DGJ	1	A	77	N/A	N/A	N/A	-142.248	166.23	179.049	60.732	-61.2942	144.601	174.25	69.9572	-169.057	-175.714	Beta	Beta	PPII-R	96.3666	4.10619	2.871	GLY	PRO	2.871	4.10619
5DGJ	1	A	154	SHEET	SHEET	SHEET	-132.561	2.57176	176.598	62.7776	-179.535	172.822	177.052	-107.075	135.621	-173.36	N/A	Beta	Beta	112.03	3.9544	4.20725	VAL	GLY	4.20725	3.9544
5DP2	0.96	A	114	SHEET	HELIX	SHEET	-146.35	-176.759	176.96	62.6133	-82.9443	152.757	173.61	-104.504	125.233	-177.718	Beta	Beta	Beta	104.228	4.06584	3.35228	ILE	SER	3.35228	4.06584
5DZE	0.97	A	26	SHEET	SHEET	N/A	-124.568	129.959	172.545	-175.892	-117.205	147.776	172.27	-112.22	12.9297	171.096	Beta	Beta	N/A	129.477	3.95866	3.88513	SER	THR	3.88513	3.95866
5DZE	0.97	A	194	SHEET	SHEET	SHEET	-104.673	125.923	-174.107	-164.986	-107.872	129.057	176.773	-116.883	118.28	177.242	Beta	Beta	Beta	116.001	3.68416	3.71471	ILE	LEU	3.71471	3.68416
5DZE	0.97	A	22	HELIX	HELIX	SHEET	54.5653	57.4937	-179.085	-164.925	-59.8624	55.6654	-149.376	-160.839	158.525	172.782	Alpha-L	N/A	Beta	119.775	2.88739	2.863	TYR	PRO	2.863	2.88739
5DZE	0.97	A	188	N/A	N/A	N/A	-72.6364	-16.0001	-178.701	53.2931	-114.444	22.1778	175.258	81.7412	8.88129	-171.052	Alpha-R	N/A	Alpha-L	144.355	3.08318	3.80401	GLY	ASP	3.80401	3.08318
5FBF	1.04	A	45	HELIX	HELIX	HELIX	-69.92	-45.3098	179.899	-67.764	-61.1301	-37.6012	179.347	-54.3289	-46.5297	-179.1	Alpha-R	Alpha-R	Alpha-R	105.58	3.12775	2.90872	PHE	GLN	2.90872	3.12775
5FG6	1.1	A	638	HELIX	HELIX	HELIX	-67.0367	-42.2069	179.267	-173.693	-71.0711	-26.8768	175.372	-60.0025	-43.5192	-176.548	Alpha-R	Alpha-R	Alpha-R	112.677	2.99602	3.11234	ASN	MET	3.11234	2.99602
5FI3	1.05	A	51	SHEET	SHEET	SHEET	-121.308	110.541	175.024	-179.037	-68.9176	152.662	168.659	-135.78	138.229	176.031	Beta	Beta	Beta	96.6186	3.89938	3.01293	TYR	GLY	3.01293	3.89938
5FI3	1.05	A	134	N/A	N/A	N/A	-77.2732	73.0001	-167.89	-175.106	-159.351	169.55	-177.461	-114.642	28.8665	155.483	Beta	Beta	N/A	110.192	3.33232	4.20372	ALA	SER	4.20372	3.33232
5FI3	1.05	A	113	HELIX	HELIX	HELIX	-65.5429	-46.9596	-175.435	-72.8416	-71.604	-24.1689	174.388	-66.9863	-40.4322	178.145	Alpha-R	Alpha-R	Alpha-R	114.243	3.00227	3.07928	MET	THR	3.07928	3.00227
5FI3	1.05	A	54	HELIX	HELIX	N/A	-170.187	177.03	-178.016	70.222	-55.2736	-37.8257	179.383	-135.047	172.378	-165.718	Beta	Alpha-R	Beta	107.914	4.18797	2.85692	THR	GLN	2.85692	4.18797
5FI3	1.05	A	110	HELIX	HELIX	N/A	-80.5725	174.477	-179.654	75.6382	-58.3861	-42.1044	-177.99	-131.969	-11.0267	178.424	Beta	Alpha-R	N/A	104.919	3.28216	2.86935	LYS	GLU	2.86935	3.28216
5FI3	1.05	B	107	N/A	N/A	N/A	-70.5763	-30.212	178.995	85.0517	82.9947	-7.01714	-166.798	-144.685	175.269	-175.405	Alpha-R	Alpha-L	Beta	140.644	3.00674	3.43576	THR	GLY	3.43576	3.00674
5FI3	1.05	A	162	HELIX	HELIX	HELIX	-125.342	-73.0661	179.369	174.369	-63.5012	-42.9067	-175.134	-75.9706	-3.52985	176.519	N/A	Alpha-R	Alpha-R	105.17	3.96585	2.97168	LEU	ALA	2.97168	3.96585
5FI3	1.05	B	121	HELIX	N/A	HELIX	-54.6712	129.39	176.194	177.666	-59.6801	-20.6016	177.158	-100.142	10.9908	171.332	Beta	Alpha-R	Alpha-R	117.859	2.80283	2.86538	TYR	PRO	2.86538	2.80283
5GGB	1.1	A	269	SHEET	SHEET	SHEET	-98.6677	120.77	-176.942	-175.248	-142.182	-155.956	-162.092	-127.57	108.8	-178.235	Beta	Beta	Beta	98.3478	3.57605	4.09445	ILE	THR	4.09445	3.57605
5GGB	1.1	A	283	HELIX	HELIX	HELIX	-59.0718	-39.1517	178.658	-72.9281	-64.7132	-37.4708	-173.957	-70.4001	-42.7944	176.258	Alpha-R	Alpha-R	Alpha-R	101.151	2.89675	2.97602	TRP	GLU	2.97602	2.89675
5GGB	1.1	A	219	HELIX	HELIX	HELIX	-72.1189	-45.9468	176.393	-62.2058	-61.1449	-42.4256	-178.869	-60.5519	-32.0849	175.666	Alpha-R	Alpha-R	Alpha-R	100.309	3.19843	2.90781	ARG	HIS	2.90781	3.19843
5HB7	0.82	A	162	N/A	N/A	N/A	-79.9537	-25.9105	178.032	-61.0191	-63.2098	-15.7989	173.539	-101.326	128.909	-169.218	Alpha-R	Alpha-R	Beta	91.3724	3.22003	3.02185	ILE	GLU	3.02185	3.22003
5IDB	1	B	44	SHEET	N/A	SHEET	-155.551	165.638	179.248	58.299	-176.483	168.16	-177.35	-126.957	161.391	177.034	Beta	Beta	Beta	112.947	4.19742	4.2191	LYS	GLY	4.2191	4.19742
5IDB	1	B	113	SHEET	SHEET	SHEET	-156.68	-165.299	178.645	68.1052	-120.827	159.863	175.915	-58.3211	133.2	-165.615	Beta	Beta	Beta	111.975	4.14662	3.89983	PRO	LYS	3.89983	4.14662
5IG6	0.91	A	425	HELIX	HELIX	HELIX	-62.7311	-44.9233	179.446	-172.483	-66.2822	-30.612	179.743	-60.2494	-41.035	177.823	Alpha-R	Alpha-R	Alpha-R	113.768	3.0095	3.0399	ASN	TYR	3.0399	3.0095
5IG6	0.91	A	353	HELIX	HELIX	HELIX	-57.2864	-45.1775	178.369	-67.6972	-62.2607	-36.1174	177.531	-59.5371	-45.8118	176.9	Alpha-R	Alpha-R	Alpha-R	106.791	2.904	2.94136	HIS	ASN	2.94136	2.904
5IHS	1.1	A	279	SHEET	SHEET	SHEET	-144.017	120.297	-174.366	-159.164	-86.3254	140.526	172.075	-149.042	150.896	-170.513	Beta	Beta	Beta	112.2	4.09375	3.35261	TYR	ASN	3.35261	4.09375
5IHS	1.1	A	80	N/A	N/A	N/A	-67.32	136.164	168.758	-69.8401	-101.165	-4.36232	175.941	61.5069	34.9521	171.712	Beta	Alpha-R	Alpha-L	126.939	3.04278	3.69056	LYS	THR	3.69056	3.04278
5IHS	1.1	A	251	N/A	N/A	N/A	-137.432	-164.269	177.438	56.5584	-78.4879	171.082	-167.069	-110.249	5.95724	-165.835	Beta	Beta	N/A	89.246	3.99659	3.04591	THR	ASP	3.04591	3.99659
5IMA	1.04	A	84	HELIX	HELIX	HELIX	-60.0896	-43.3811	-178.245	-167.819	-67.3253	-42.9999	-178.601	-65.1082	-48.5268	179.215	Alpha-R	Alpha-R	Alpha-R	101.913	2.93229	3.03076	PHE	ALA	3.03076	2.93229
5IMA	1.04	A	102	HELIX	HELIX	HELIX	-56.3544	-44.8602	-179.668	-72.8907	-65.4312	-38.5934	-179.749	-68.904	-41.6092	177.029	Alpha-R	Alpha-R	Alpha-R	104.463	2.88599	2.96554	LEU	ARG	2.96554	2.88599
5J1N	1.09	A	60	N/A	SHEET	N/A	-109.414	155.713	169.028	-74.0791	-79.9091	131.782	171.302	65.5987	29.2377	-178.355	Beta	Beta	Alpha-L	117.074	3.7502	3.32537	GLY	GLU	3.32537	3.7502
5J1N	1.09	A	55	HELIX	HELIX	HELIX	-64.49	-43.4016	174.262	-72.7542	-56.8125	-46.489	-175.308	-62.4901	-42.4187	178.148	Alpha-R	Alpha-R	Alpha-R	97.5736	2.96751	2.89858	SER	ASN	2.89858	2.96751
5J1N	1.09	A	49	HELIX	HELIX	HELIX	-59.0616	-44.332	-179.772	-68.5806	-67.1021	-39.166	178.174	-59.4204	-44.3874	178.705	Alpha-R	Alpha-R	Alpha-R	101.573	2.89946	3.00763	LEU	ILE	3.00763	2.89946
5J1N	1.09	A	84	N/A	N/A	N/A	-56.1917	148.098	173.539	-63.2955	-71.1966	115.238	176.758	-81.6507	143.709	160.889	Beta	Beta	Beta	125.091	3.01217	3.15616	LEU	PHE	3.15616	3.01217
5J1N	1.09	A	103	SHEET	SHEET	SHEET	-149.433	158.511	-177.551	44.2581	-169.163	165.172	172.236	-114.238	146.174	-178.419	Beta	Beta	Beta	110.411	3.90094	4.16337	GLU	PHE	4.16337	3.90094
5J1N	1.09	A	7	HELIX	HELIX	HELIX	-60.6108	-47.6598	179.18	176.13	-61.5387	-42.4286	176.545	-60.961	-39.9265	178.573	Alpha-R	Alpha-R	Alpha-R	103.913	2.92314	2.95893	ALA	VAL	2.95893	2.92314
5J93	1.1	A	126	HELIX	HELIX	HELIX	-55.357	-50.8644	178.286	-71.743	-57.6342	-42.2689	-178.971	-67.1431	-41.0418	173.921	Alpha-R	Alpha-R	Alpha-R	103.801	2.85491	2.94749	LEU	ASP	2.94749	2.85491
5J93	1.1	A	12	HELIX	HELIX	HELIX	-67.334	-42.9667	175.908	-65.2119	-55.4747	-46.986	-179.767	-65.2599	-39.0286	177.975	Alpha-R	Alpha-R	Alpha-R	98.9284	3.06738	2.88521	ASP	GLU	2.88521	3.06738
5JBX	1.1	B	117	HELIX	N/A	HELIX	-68.0023	161.182	179.687	-68.6286	-73.6373	-38.7537	-174.61	-72.2418	-26.2786	178.393	Beta	Alpha-R	Alpha-R	107.05	3.05813	3.16125	ALA	ASP	3.16125	3.05813
5JBX	1.1	A	96	N/A	SHEET	N/A	-73.2521	142.368	178.42	-43.6266	-91.3565	128.837	-176.568	-68.6647	-22.3422	179.046	Beta	Beta	Alpha-R	120.084	3.13946	3.49077	ASP	VAL	3.49077	3.13946
5JBX	1.1	A	61	SHEET	N/A	SHEET	-169.567	120.063	-176.058	172.641	-84.287	13.1501	177.001	-69.1874	-53.5932	179.716	Beta	Alpha-R	Alpha-R	144.249	4.25137	3.37611	PHE	ALA	3.37611	4.25137
5JDK	1	A	116	HELIX	HELIX	HELIX	-63.012	-41.4957	176.949	-68.7636	-58.3654	-43.2256	-178.125	-61.2918	-43.0383	177.886	Alpha-R	Alpha-R	Alpha-R	100.333	2.96927	2.8692	LEU	ASP	2.8692	2.96927
5JDK	1	A	81	HELIX	HELIX	HELIX	-63.2557	-50.2823	179.221	174.23	-58.8705	-38.1229	179.712	-65.5489	-40.2326	177.963	Alpha-R	Alpha-R	Alpha-R	103.071	2.94798	2.85463	ALA	ARG	2.85463	2.94798
5JH8	1.02	A	64	SHEET	SHEET	SHEET	-95.9638	113.432	-168.135	174.989	-118.157	28.1195	126.146	-77.0576	113.893	-176.988	Beta	N/A	Beta	126.556	3.53354	3.85053	GLY	VAL	3.85053	3.53354
5JSK	0.95	B	247	SHEET	HELIX	SHEET	-137.661	132.329	-178.439	-179.788	-106.171	1.21991	179.733	-131.992	139.194	166.952	Beta	Alpha-R	Beta	132.515	4.1422	3.70619	LEU	VAL	3.70619	4.1422
5JSK	0.95	A	211	HELIX	HELIX	HELIX	-82.9148	140.71	175.707	-179.609	-63.476	-16.0255	-179.996	-114.617	12.7984	-169.979	Beta	Alpha-R	N/A	122.818	3.2113	3.00508	ASN	PRO	3.00508	3.2113
5JSK	0.95	B	75	SHEET	SHEET	SHEET	-159.671	124.57	176.632	-176.331	-86.6217	-2.34421	172.271	-56.832	-37.2135	-171.091	Beta	Alpha-R	Alpha-R	131.978	4.16101	3.44094	ILE	GLY	3.44094	4.16101
5JSK	0.95	A	89	HELIX	SHEET	HELIX	-152.255	98.2725	172.997	-172.037	-99.3315	123.322	-173.621	-77.9728	-1.2567	171.792	Beta	Beta	Alpha-R	125.779	4.14311	3.63695	TYR	ILE	3.63695	4.14311
5JSK	0.95	A	238	N/A	HELIX	HELIX	-54.8643	131.692	177.592	-171.07	-102.752	12.009	175.909	114.806	4.50481	-174.466	Beta	Alpha-R	N/A	140.259	2.76466	3.69216	GLY	LYS	3.69216	2.76466
5JSK	0.95	A	159	HELIX	HELIX	HELIX	-137.215	74.3663	-1.97357	-166.627	-86.653	168.524	164.351	119.407	154.707	-177.37	Beta	Beta	N/A	75.1105	4.02024	4.3642	GLY	PRO	4.3642	4.02024
5JSK	0.95	A	21	SHEET	HELIX	SHEET	-70.5655	-37.1101	170.66	-73.0914	-64.6734	-45.6888	-176.896	-67.863	-29.0585	175.749	Alpha-R	Alpha-R	Alpha-R	99.8144	3.13001	3.0182	GLY	SER	3.0182	3.13001
5JSK	0.95	B	172	HELIX	HELIX	HELIX	-59.8154	-40.3846	175.87	-68.0963	-68.0168	-30.5995	169.072	-61.2764	-37.3929	175.615	Alpha-R	Alpha-R	Alpha-R	108.603	2.87576	3.08737	ILE	HIS	3.08737	2.87576
5JSK	0.95	B	449	HELIX	HELIX	HELIX	-108.147	25.1039	-178.158	-65.6146	-82.4507	163.155	176.859	-85.5971	-44.1627	-162.813	Alpha-R	Beta	Alpha-R	93.1769	3.67828	3.32564	ASN	ASN	3.32564	3.67828
5JSK	0.95	A	121	HELIX	HELIX	HELIX	-58.6711	-54.7293	-178.646	-63.0706	-66.0439	-41.1555	-174.676	-61.1874	-33.7443	177.044	Alpha-R	Alpha-R	Alpha-R	103.909	2.83433	3.01113	THR	ALA	3.01113	2.83433
5JSK	0.95	A	259	HELIX	SHEET	HELIX	-62.8248	-40.8322	-175.892	-53.2694	-70.0463	-39.1537	176.054	-155.819	169.912	-165.897	Alpha-R	Alpha-R	Beta	103.331	2.8705	3.056	TRP	VAL	3.056	2.8705
5JSK	0.95	A	268	SHEET	N/A	SHEET	-71.9804	-16.4258	179.272	75.0895	-89.4054	-2.00712	-171.493	71.1962	36.4102	-163.519	Alpha-R	Alpha-R	Alpha-L	134.867	3.05753	3.51982	GLY	VAL	3.51982	3.05753
5JSK	0.95	A	18	SHEET	SHEET	SHEET	-109.382	0.452017	-176.434	77.6635	75.7174	0.275126	178.235	-108.752	167.915	176.832	Alpha-R	Alpha-L	Beta	140.851	3.79694	3.3181	GLY	THR	3.3181	3.79694
5JSK	0.95	A	232	HELIX	HELIX	HELIX	-69.1519	149.428	-176.41	165.647	-92.7428	6.8298	-173.738	-80.6692	168.586	170.913	Beta	Alpha-R	Beta	139.006	3.14853	3.56418	GLY	ARG	3.56418	3.14853
5JSK	0.95	A	265	SHEET	SHEET	N/A	-77.4356	135.802	177.496	174.89	-106.731	7.84571	173.948	-138.245	157.408	163.087	Beta	Alpha-R	Beta	137.423	3.32991	3.78854	VAL	ILE	3.78854	3.32991
5JUG	0.96	A	107	HELIX	HELIX	HELIX	-64.3946	-41.2089	176.08	-77.0308	-55.6352	-46.8162	-177.803	-58.8071	-44.7868	178.73	Alpha-R	Alpha-R	Alpha-R	98.4425	3.02608	2.81313	SER	LEU	2.81313	3.02608
5JUG	0.96	A	80	HELIX	HELIX	HELIX	-102.88	133.181	-173.321	-56.8137	-57.2076	-38.1422	-175.183	-112.162	-28.5861	-164.324	Beta	Alpha-R	N/A	106.752	3.4875	2.84155	ALA	ALA	2.84155	3.4875
5L87	0.87	A	46	HELIX	HELIX	HELIX	-57.0498	-46.9906	179.338	-173.3	-59.235	-44.7781	-178.559	-60.1075	-46.1911	179.082	Alpha-R	Alpha-R	Alpha-R	101.261	2.88793	2.84727	ILE	GLU	2.84727	2.88793
5LJP	1.1	A	54	N/A	N/A	SHEET	-157.321	126.953	173.315	-171.347	-81.4172	156.016	173.568	-113.265	126.658	177.776	Beta	Beta	Beta	99.5801	4.17001	3.28757	GLY	PRO	3.28757	4.17001
5LUN	1.08	D	59	HELIX	HELIX	HELIX	-64.8704	-21.867	176.47	-72.8972	-75.4246	-11.8049	175.825	-64.1028	-41.4277	-177.812	Alpha-R	Alpha-R	Alpha-R	127.559	2.97695	3.19769	PHE	LYS	3.19769	2.97695
5LUN	1.08	D	317	HELIX	HELIX	HELIX	-66.9655	-37.5087	-163.971	-69.8196	-136.447	63.9993	-171.18	-73.9824	-29.6601	175.981	Alpha-R	Beta	Alpha-R	150.989	3.07475	4.08021	ARG	TYR	4.08021	3.07475
5LUN	1.08	D	16	HELIX	HELIX	N/A	-53.871	161.044	177.625	-69.2514	-56.127	-33.3891	176.835	97.7078	7.65775	171.632	Beta	Alpha-R	Alpha-L	107.212	2.88219	2.8577	GLY	ALA	2.8577	2.88219
5LUN	1.08	A	280	SHEET	SHEET	SHEET	-128.763	130.126	177.624	-67.607	-116.371	123.045	-178.508	-148.965	158.483	171.184	Beta	Beta	Beta	128.606	3.97674	3.82976	ALA	ALA	3.82976	3.97674
5LUN	1.08	A	69	HELIX	N/A	HELIX	-86.1507	69.5087	-175.372	-66.3844	-140.139	161.06	-177.433	-76.6149	-13.8816	-175.883	Beta	Beta	Alpha-R	110.833	3.32474	4.0699	SER	VAL	4.0699	3.32474
5LUN	1.08	D	99	N/A	N/A	SHEET	-102.671	179.255	177.82	-61.2777	-49.6851	131.39	-172.816	-114.083	109.103	170.72	Beta	Beta	Beta	98.255	3.72462	2.75738	VAL	LYS	2.75738	3.72462
5LUN	1.08	D	115	N/A	N/A	N/A	73.2257	0.735558	-174.307	-54.2185	-100.204	123.427	179.602	-60.6567	143.306	179.191	Alpha-L	Beta	Beta	126.872	3.37573	3.5922	PRO	HIS	3.5922	3.37573
5LVO	1.09	A	181	HELIX	HELIX	HELIX	-69.7322	-40.4917	174.489	-70.5551	-57.4635	-48.4871	-177.348	-59.4735	-46.0586	-179.69	Alpha-R	Alpha-R	Alpha-R	98.9865	3.08258	2.84392	THR	THR	2.84392	3.08258
5LVO	1.09	A	270	HELIX	HELIX	HELIX	-60.2794	-42.9578	-177.926	-67.6143	-66.7121	-45.1786	177.76	-58.0491	-41.4575	175.921	Alpha-R	Alpha-R	Alpha-R	99.8989	2.9466	3.07338	GLY	ILE	3.07338	2.9466
5LVO	1.09	A	260	HELIX	HELIX	N/A	-143.125	175.58	178.133	59.614	-54.5844	-39.2902	-179.012	-114.737	164.345	179.175	Beta	Alpha-R	Beta	105.283	4.11762	2.74422	ALA	LYS	2.74422	4.11762
5LVO	1.09	A	327	HELIX	HELIX	N/A	-76.2922	162.322	-176.781	78.361	-60.8023	-38.1539	-179.059	106.703	-19.0942	-176.411	Beta	Alpha-R	Alpha-L	104.697	3.1643	2.86073	GLY	GLU	2.86073	3.1643
5M17	1.03	A	43	SHEET	SHEET	SHEET	-101.04	123.491	177.897	-94.2353	-75.8704	123.788	-169.67	-114.469	119.842	178.965	Beta	Beta	Beta	121.465	3.67733	3.14479	PHE	PHE	3.14479	3.67733
5M17	1.03	A	152	SHEET	SHEET	SHEET	-125.78	169.133	-176.205	69.7279	-107.656	141.157	176.119	-128.648	130.722	167.807	Beta	Beta	Beta	119.892	4.0233	3.68202	VAL	PHE	3.68202	4.0233
5M1P	1.1	A	316	SHEET	SHEET	SHEET	-160.311	141.209	174.256	-174.999	-133.502	124.987	179.502	-91.275	-29.61	-175.381	Beta	Beta	Alpha-R	125.12	4.19477	4.03192	ALA	LEU	4.03192	4.19477
5M1P	1.1	A	290	SHEET	SHEET	SHEET	-136.186	168.894	-177.039	71.0797	-132.706	115.028	172.407	-125.639	157.139	166.748	Beta	Beta	Beta	131.383	4.07213	4.01536	TYR	ILE	4.01536	4.07213
5MDU	1.02	A	484	HELIX	HELIX	HELIX	-88.9449	-5.75274	-174.26	-65.2212	-97.3137	122.32	174.312	-66.1365	-17.2715	-178.791	Alpha-R	Beta	Alpha-R	126.435	3.40163	3.4958	GLU	SER	3.4958	3.40163
5NW3	0.59	A	41	N/A	N/A	N/A	-109.944	-8.94781	179.501	73.6455	84.0105	6.95104	-178.669	-92.3782	-56.1186	-171.43	Alpha-R	Alpha-L	Alpha-R	129.397	3.69077	3.36421	ILE	GLY	3.36421	3.69077
5NW3	0.59	A	8	N/A	N/A	N/A	-119.268	-9.60186	178.92	76.4376	89.2374	-3.29544	171.885	-77.1664	-52.5125	-166.168	N/A	Alpha-L	Alpha-R	135.583	3.81756	3.42222	ILE	GLY	3.42222	3.81756
5NW3	0.59	A	5	SHEET	N/A	SHEET	-73.2049	113.95	-176.471	178.025	-65.0304	-20.8789	-178.692	-105.407	138.232	165.593	Beta	Alpha-R	Beta	118.96	3.2009	2.94969	VAL	LYS	2.94969	3.2009
5NW3	0.59	A	38	N/A	N/A	N/A	-52.1247	127.766	-177.209	179.216	-72.1262	-12.8642	-178.641	-130.089	160.784	172.6	Beta	Alpha-R	Beta	125.246	2.75324	3.06776	VAL	PRO	3.06776	2.75324
5NYK	1.05	A	67	SHEET	SHEET	SHEET	-135.605	156.901	176.403	54.5767	-147.1	125.67	178.564	-129.73	161.344	174.661	Beta	Beta	Beta	122.789	4.04232	4.11194	TYR	ALA	4.11194	4.04232
5O99	0.87	B	523	N/A	SHEET	N/A	-77.0511	-13.4611	-170.27	-64.0706	-128.721	154.084	175.314	-65.7369	-8.94835	174.829	Alpha-R	Beta	Alpha-R	115.209	3.28223	3.9223	ASP	VAL	3.9223	3.28223
5OAZ	1.03	A	100	SHEET	SHEET	SHEET	-117.603	140.661	174.864	-69.8668	-94.2484	120.539	-167.847	-131.668	144.104	175.163	Beta	Beta	Beta	126.553	3.92564	3.45094	TRP	GLU	3.45094	3.92564
5OHQ	1.1	A	1012	N/A	N/A	N/A	-110.837	139.679	166.777	-66.9069	-89.0809	110.267	-175.117	-106.619	134.948	-178.763	Beta	Beta	Beta	134.02	3.70432	3.44118	MET	SER	3.44118	3.70432
5OJ5	1.08	A	294	SHEET	SHEET	SHEET	-131.597	135.809	169.253	176.963	-113.596	135.59	177.953	-124.652	155.405	176.925	Beta	Beta	Beta	121.851	4.03199	3.84287	LEU	SER	3.84287	4.03199
5OLR	1.07	A	254	N/A	N/A	N/A	-115.899	113.321	-162.808	-166.492	-89.3785	-8.27903	171.105	52.7897	44.7515	-173.128	Beta	Alpha-R	Alpha-L	127.185	3.76527	3.40655	ASN	PHE	3.40655	3.76527
5OLR	1.07	C	263	N/A	SHEET	N/A	-117.857	153.703	178.536	-67.5315	-118.625	135.543	-176.864	55.1969	48.6686	178.713	Beta	Beta	Alpha-L	121.169	3.86208	3.87851	ASN	TRP	3.87851	3.86208
5OLR	1.07	A	196	N/A	SHEET	N/A	-98.7713	151.704	175.257	-67.1956	-118.077	136.605	170.169	59.274	34.6658	-179.444	Beta	Beta	Alpha-L	121.598	3.5338	3.89585	ASN	ASP	3.89585	3.5338
5OLR	1.07	C	239	N/A	SHEET	N/A	-93.0018	154.566	173.083	-66.4787	-122.211	139.327	175.158	69.8936	15.4622	-173.151	Beta	Beta	Alpha-L	120.911	3.45778	3.9337	GLY	ARG	3.9337	3.45778
5OLR	1.07	B	158	SHEET	SHEET	SHEET	-73.7545	-44.4056	176.112	-64.1277	-129.826	125.083	171.579	-132.815	143.764	170.545	Alpha-R	Beta	Beta	125.823	3.15971	4.03468	GLU	PHE	4.03468	3.15971
5OLR	1.07	B	86	SHEET	SHEET	SHEET	-99.375	117.249	-173.989	-55.9138	-69.5246	-57.2862	179.604	-92.4895	110.29	-179.746	Beta	Alpha-R	Beta	89.751	3.60273	3.03921	HIS	VAL	3.03921	3.60273
5OLR	1.07	A	447	N/A	N/A	N/A	-79.349	-20.4964	179.369	58.8083	-100.538	10.1791	-139.069	97.2046	170.547	-172.366	Alpha-R	Alpha-R	N/A	103.88	3.21816	3.59075	GLY	PHE	3.59075	3.21816
5P9V	1.04	A	33	HELIX	HELIX	HELIX	-69.2428	-30.6683	178.037	-74.5581	-77.6842	-41.6246	-171.509	-59.284	-43.6277	-175.912	Alpha-R	Alpha-R	Alpha-R	100.179	3.0576	3.26103	TYR	THR	3.26103	3.0576
5P9V	1.04	A	157	HELIX	N/A	HELIX	-75.9226	-4.58821	179.253	-68.3028	78.3252	22.3912	-173.897	-56.392	-41.7725	-175.841	Alpha-R	Alpha-L	Alpha-R	118.936	3.26236	3.22116	LYS	GLY	3.22116	3.26236
5P9V	1.04	A	95	HELIX	HELIX	HELIX	-60.6662	-47.1255	178.651	-67.6474	-57.3642	-40.6948	179.7	-62.2308	-42.2452	174.999	Alpha-R	Alpha-R	Alpha-R	100.059	3.08302	2.86717	ASP	ALA	2.86717	3.08302
5P9V	1.04	A	69	N/A	HELIX	N/A	-101.93	0.719405	179.551	-63.1048	94.1512	6.18796	-179.236	62.5234	-111.053	179.714	Alpha-R	Alpha-L	PPII-R	128.343	3.67846	3.55922	TYR	GLY	3.55922	3.67846
5P9V	1.04	A	191	SHEET	SHEET	SHEET	-114.623	145.213	177.122	-58.3502	-135.724	136.731	175.247	-110.85	115.36	-168.801	Beta	Beta	Beta	119.417	3.78394	4.12596	GLU	THR	4.12596	3.78394
5QHT	1.05	A	1327	N/A	N/A	N/A	-122.254	131.759	177.684	-89.6132	-136.703	156.636	172.353	-134.601	138.889	170.172	Beta	Beta	Beta	113.061	4.02863	4.07064	ILE	LEU	4.07064	4.02863
5QHT	1.05	A	1274	N/A	HELIX	HELIX	-62.2804	-49.6005	-179.68	-72.0483	-69.8357	-31.4963	174.775	-62.8289	-35.8133	175.358	Alpha-R	Alpha-R	Alpha-R	111.031	3.11839	3.15466	GLU	SER	3.15466	3.11839
5QHT	1.05	A	1318	N/A	HELIX	HELIX	-69.358	-40.4578	170.859	-70.8927	-58.9864	29.5315	-149.35	-65.3938	-34.7982	176.04	Alpha-R	Alpha-R	Alpha-R	102.063	3.09386	3.00712	GLU	GLU	3.00712	3.09386
5QHT	1.05	A	1265	N/A	HELIX	HELIX	-77.4273	-31.3816	175.994	-63.0821	-69.3787	-42.8113	171.86	-62.7392	-46.4889	-178.542	Alpha-R	Alpha-R	Alpha-R	102.299	3.27703	3.20557	GLU	ALA	3.20557	3.27703
5QHT	1.05	A	1295	N/A	N/A	N/A	-154.81	165.515	177.019	65.9106	-84.799	-37.8512	176.702	-86.8891	67.4581	179.638	Beta	Alpha-R	Beta	107.179	4.18875	3.43399	ARG	LYS	3.43399	4.18875
5R4O	1.05	A	2877	N/A	HELIX	HELIX	-65.4131	-43.8375	-179.71	-176.893	-72.6645	-24.2436	176.768	-55.6594	-44.168	-177.97	Alpha-R	Alpha-R	Alpha-R	112.899	3.0588	3.11963	ASN	ARG	3.11963	3.0588
5R4O	1.05	A	2890	N/A	HELIX	HELIX	-59.8604	-42.937	177.868	-69.4337	-59.6778	-40.4268	177.081	-55.1304	-46.8206	178.444	Alpha-R	Alpha-R	Alpha-R	105.025	2.9368	2.9644	GLN	ALA	2.9644	2.9368
5S9G	1.09	A	1335	N/A	HELIX	HELIX	-70.8362	128.697	179.489	-167.711	-60.9869	-31.6687	179.291	-78.8067	-26.5955	-178.766	Beta	Alpha-R	Alpha-R	109.247	3.10838	2.92902	GLN	GLU	2.92902	3.10838
5S9G	1.09	A	1382	N/A	HELIX	HELIX	-57.1663	-43.5521	-178.449	-84.1996	-61.4618	-41.9144	179.247	-62.1707	-41.6225	176.909	Alpha-R	Alpha-R	Alpha-R	98.7695	2.89979	2.89096	LEU	LYS	2.89096	2.89979
5S9G	1.09	A	1325	N/A	HELIX	HELIX	-71.0124	-36.9425	175.394	-72.8511	-59.7268	-44.2855	179.671	-62.0659	-38.4174	176.865	Alpha-R	Alpha-R	Alpha-R	99.216	3.09098	2.91327	GLN	GLU	2.91327	3.09098
5SVY	1.05	A	446	N/A	N/A	N/A	-59.0824	-20.8819	-179.335	-68.5958	-76.5926	-16.4731	-178.52	-127.751	134.638	-179.355	Alpha-R	Alpha-R	Beta	120.617	2.95778	3.15102	ASN	GLU	3.15102	2.95778
5SVY	1.05	A	435	HELIX	HELIX	HELIX	-49.8933	-38.3335	-178.6	-65.0883	-57.1257	-18.3124	177.857	-133.394	156.244	177.914	Alpha-R	Alpha-R	Beta	123.004	2.77826	2.89898	TYR	SER	2.89898	2.77826
5SVY	1.05	A	416	N/A	N/A	N/A	-104.991	-8.94253	176.125	77.098	70.6243	9.07685	171.972	-89.9605	-51.6663	-173.721	Alpha-R	Alpha-L	Alpha-R	135.134	3.64719	3.20323	ALA	LEU	3.20323	3.64719
5SVY	1.05	A	413	N/A	N/A	SHEET	-69.087	126.054	-179.291	177.814	-70.0497	-17.0912	177.58	-94.3134	131.477	171.303	Beta	Alpha-R	Beta	123.131	3.13082	3.11844	GLN	ASP	3.11844	3.13082
5SY4	0.98	B	106	N/A	HELIX	SHEET	58.8025	-105.194	179.76	-161.477	-77.1604	-17.7774	-167.722	-125.255	151.264	168.217	PPII-R	Alpha-R	Beta	116.477	3.11213	3.2994	ILE	ALA	3.2994	3.11213
5SY4	0.98	B	81	HELIX	HELIX	HELIX	-54.4295	-50.5927	178.135	-71.2083	-55.9746	-48.6431	-178.98	-62.2329	-42.7431	175.019	Alpha-R	Alpha-R	Alpha-R	99.0039	2.86419	2.85027	GLU	PHE	2.85027	2.86419
5SY4	0.98	A	47	N/A	N/A	SHEET	-83.0783	176.75	-167.819	-67.5332	-60.3816	-28.6932	178.102	-90.2336	116.018	-176.749	Beta	Alpha-R	Beta	118.835	3.34281	3.01586	THR	SER	3.01586	3.34281
5SY4	0.98	B	8	SHEET	SHEET	SHEET	-85.947	146.754	-178.62	-64.8315	-136.424	143.699	176.845	-103.045	115.086	-178.098	Beta	Beta	Beta	118.366	3.32132	4.06093	VAL	LEU	4.06093	3.32132
5TDA	0.79	A	149	N/A	N/A	N/A	-71.9625	135.211	-178.663	-179.823	-96.6781	14.6437	175.547	-148.358	156.914	175.683	Beta	Alpha-R	Beta	143.366	3.17312	3.60992	PHE	ASP	3.60992	3.17312
5TDA	0.79	A	99	N/A	N/A	N/A	-77.4937	-76.6031	-179.13	-177.232	69.1152	36.9034	-167.72	-107.205	173.874	-172.759	Alpha-R	Alpha-L	Beta	124.72	3.16796	3.12348	LEU	GLY	3.12348	3.16796
5TDA	0.79	A	112	SHEET	N/A	SHEET	-87.3897	114.168	179.863	-175.652	-66.1144	-28.1466	-178.61	-121.921	142.714	173.21	Beta	Alpha-R	Beta	112.383	3.40594	3.0195	SER	ARG	3.0195	3.40594
5TDA	0.79	A	127	HELIX	HELIX	HELIX	-74.9817	-40.103	178.749	-63.8047	-58.5971	-53.3438	-175.343	-56.5049	-47.2057	-176.136	Alpha-R	Alpha-R	Alpha-R	93.9066	3.10993	2.84996	GLU	PHE	2.84996	3.10993
5TDA	0.79	A	121	N/A	N/A	N/A	-82.7775	132.647	-171.255	-63.0223	-152.017	160.954	178.409	-89.2838	-9.22628	-174.314	Beta	Beta	Alpha-R	113.618	3.30404	4.17012	THR	VAL	4.17012	3.30404
5TDA	0.79	A	115	N/A	N/A	N/A	-109.635	-18.4751	-177.932	-58.4162	-60.3192	137.003	176.055	-76.309	-38.8984	-167.324	Alpha-R	Beta	Alpha-R	103.812	3.71033	2.87188	ASP	ALA	2.87188	3.71033
5TDA	0.79	A	124	SHEET	HELIX	SHEET	-67.5259	168.415	-175.911	73.8588	-65.781	-39.9656	178.427	-130.2	145.179	166.259	Beta	Alpha-R	Beta	104.848	3.1453	2.94597	LEU	MET	2.94597	3.1453
5TDA	0.79	A	163	N/A	N/A	N/A	-100.434	175.768	-175.314	74.5869	-65.1476	-29.3354	178.855	-124.692	160.032	165.778	Beta	Alpha-R	Beta	111.935	3.52857	2.97356	TYR	GLN	2.97356	3.52857
5TDA	0.79	A	151	N/A	N/A	N/A	-59.2603	130.885	178.972	178.57	93.2224	-11.9762	175.083	-96.6781	14.6437	175.547	Beta	Alpha-L	Alpha-R	141.199	2.86429	3.53047	ASP	GLY	3.53047	2.86429
5TFQ	1.07	A	142	SHEET	SHEET	N/A	-159.268	151.927	163.819	170.946	-151.272	141.951	178.837	-90.3944	66.6703	-175.976	Beta	Beta	Beta	118.697	4.22721	4.12246	ASP	ASN	4.12246	4.22721
5TFQ	1.07	A	117	HELIX	HELIX	HELIX	-52.0221	-53.8505	-173.853	173.76	-70.984	-29.474	171.861	-66.0703	-36.5403	174.149	Alpha-R	Alpha-R	Alpha-R	108.093	2.80881	3.06427	THR	ASP	3.06427	2.80881
5TNV	1.04	A	278	SHEET	SHEET	SHEET	-138.652	117.637	177.614	-179.004	-83.8371	115.348	174.344	-99.2208	155.184	171.895	Beta	Beta	Beta	129.966	4.08201	3.38417	PHE	CYS	3.38417	4.08201
5TNV	1.04	A	290	HELIX	HELIX	HELIX	-55.6419	-40.8525	179.942	-74.1644	-64.7066	-41.7524	173.335	-68.4773	-42.1368	175.5	Alpha-R	Alpha-R	Alpha-R	102.206	2.81809	2.98877	VAL	ALA	2.98877	2.81809
5TNV	1.04	A	279	SHEET	N/A	SHEET	-83.8371	115.348	174.344	-64.0119	-115.085	151.316	173.172	-138.652	117.637	177.614	Beta	Beta	Beta	109.202	3.38417	3.97104	CYS	GLU	3.97104	3.38417
5U3A	0.95	A	103	SHEET	SHEET	SHEET	-86.3432	179.619	178.409	67.5718	-60.299	141.697	-174.289	-100.48	-147.128	-173.039	Beta	Beta	Beta	98.1734	3.2492	2.90136	MET	GLY	2.90136	3.2492
5U4H	1.05	A	225	N/A	SHEET	N/A	-161.809	-178.803	168.987	68.8956	-112.86	129.782	-174.833	-71.9345	167.81	177.58	Beta	Beta	Beta	104.963	4.23613	3.85349	GLY	GLU	3.85349	4.23613
5U4H	1.05	A	116	N/A	N/A	N/A	-112.885	132.987	-174.114	170.026	-55.6019	-38.9739	-177.076	-73.6795	156.578	173.67	Beta	Alpha-R	Beta	106.582	3.85894	2.80808	GLY	ALA	2.80808	3.85894
5UMP	1.08	A	82	HELIX	HELIX	HELIX	-61.0546	-43.4112	177.796	-68.219	-62.9193	-37.6849	175.871	-67.5348	-41.3814	175.451	Alpha-R	Alpha-R	Alpha-R	101.856	3.00113	2.93023	ASP	ALA	2.93023	3.00113
5WGI	1.05	A	541	HELIX	HELIX	HELIX	-64.0354	-41.0514	177.072	-69.5181	-63.0026	-38.203	175.907	-60.0131	-42.1767	179.071	Alpha-R	Alpha-R	Alpha-R	103.147	2.93941	2.95507	THR	ALA	2.95507	2.93941
5WGI	1.05	A	549	HELIX	HELIX	HELIX	-73.0163	-34.3731	174.373	-69.0968	-61.233	-45.1756	179.339	-60.1027	-41.8953	179.185	Alpha-R	Alpha-R	Alpha-R	97.3503	3.13382	2.91541	SER	PHE	2.91541	3.13382
5WGI	1.05	A	486	HELIX	SHEET	HELIX	-102.186	155.079	168.319	-65.3922	-85.6471	122.447	-175.787	-85.2177	-12.0412	-175.415	Beta	Beta	Alpha-R	124.783	3.64519	3.43916	ARG	HIS	3.43916	3.64519
5WGI	1.05	A	757	HELIX	HELIX	HELIX	-62.9543	-45.3837	178.487	-64.2775	-61.5924	-40.4825	175.979	-64.391	-34.7492	175.559	Alpha-R	Alpha-R	Alpha-R	102.808	2.95319	2.93099	MET	THR	2.93099	2.95319
5WGI	1.05	A	502	N/A	N/A	N/A	-128.401	-21.6459	-170.043	-59.3737	-114.486	151.698	179.58	-59.9874	-30.4656	-178.225	N/A	Beta	Alpha-R	114.348	4.01312	3.76826	LEU	HIS	3.76826	4.01312
5WGI	1.05	A	584	N/A	N/A	N/A	-112.718	134.003	178.916	-55.3736	-102.537	-51.8048	179.028	77.8322	2.60286	-173.114	Beta	Alpha-R	Alpha-L	100.655	3.80091	3.6605	PHE	PHE	3.6605	3.80091
5WGI	1.05	A	581	N/A	N/A	N/A	-169.46	144.404	163.866	179.275	56.3442	45.9625	175.716	-88.3471	157.933	-178.658	Beta	Alpha-L	Beta	102.938	4.21254	2.8098	ALA	GLY	2.8098	4.21254
5XEC	1.1	C	13	HELIX	HELIX	HELIX	-120.668	0.811473	-175.784	-64.0266	-139.981	131.689	170.222	-64.8497	-28.0647	-174.02	N/A	Beta	Alpha-R	124.65	3.8553	4.03478	ALA	HIS	4.03478	3.8553
5XEC	1.1	A	15	HELIX	N/A	HELIX	-129.863	-7.36633	-173.111	-59.6812	-140.807	147.245	170.146	-67.916	-22.0227	-169.507	N/A	Beta	Alpha-R	119.983	4.01307	4.0527	ALA	HIS	4.0527	4.01307
5XEC	1.1	C	10	HELIX	HELIX	HELIX	-63.1271	-33.1229	-174.012	-51.2064	-76.0595	-5.77402	171.345	89.3125	7.63335	-173.989	Alpha-R	Alpha-R	Alpha-L	128.249	2.92498	3.17009	GLY	MET	3.17009	2.92498
5XEC	1.1	A	12	HELIX	HELIX	HELIX	-54.9503	-35.1748	-178.316	-38.487	-59.6228	-22.5088	176.983	85.4307	-7.80187	-179.947	Alpha-R	Alpha-R	Alpha-L	119.611	2.81405	3.00686	GLY	VAL	3.00686	2.81405
5XP6	0.95	A	208	HELIX	HELIX	HELIX	-82.9306	-5.37623	177.778	-52.6337	-65.1877	-39.1111	-171.106	55.5305	-140.265	-175.426	Alpha-R	Alpha-R	PPII-R	106.52	3.26113	3.04355	GLY	LEU	3.04355	3.26113
5XVT	0.85	A	157	HELIX	HELIX	HELIX	-61.1122	-39.254	179.501	-68.7878	-69.7465	-22.0476	175.507	-62.6589	-42.7416	176.179	Alpha-R	Alpha-R	Alpha-R	118.171	2.91937	3.17709	GLY	LEU	3.17709	2.91937
5XVT	0.85	A	121	HELIX	HELIX	HELIX	-66.0254	-39.1039	174.071	-58.5597	-59.3219	-40.577	177.017	-61.4767	-39.584	177.101	Alpha-R	Alpha-R	Alpha-R	102.874	3.01525	2.90046	ILE	ASN	2.90046	3.01525
5XVT	0.85	A	68	HELIX	HELIX	HELIX	-63.2902	-18.1267	172.278	60.966	-57.0023	-30.855	174.13	-79.3579	17.2697	-171.334	Alpha-R	Alpha-R	Alpha-R	110.177	2.95577	2.79725	ALA	ALA	2.79725	2.95577
5Y0M	1.03	A	105	SHEET	SHEET	SHEET	-118.251	119.165	178.716	-179.625	-107.554	134.342	-174.776	-116.46	128.469	179.851	Beta	Beta	Beta	118.735	3.85376	3.74468	ILE	LEU	3.74468	3.85376
5Y9Z	1.09	A	86	HELIX	HELIX	HELIX	-63.378	-45.4506	179.726	-173.093	-63.6841	-41.6297	174.035	-59.5072	-38.1898	176.001	Alpha-R	Alpha-R	Alpha-R	101.518	3.01046	2.98905	GLN	GLN	2.98905	3.01046
5Y9Z	1.09	B	156	HELIX	HELIX	HELIX	-64.096	-45.2055	179.914	-68.2463	-62.5266	-35.4391	176.757	-66.1471	-51.1531	-178.935	Alpha-R	Alpha-R	Alpha-R	105.825	2.9314	2.97779	ILE	SER	2.97779	2.9314
5Z3E	1.1	A	251	HELIX	HELIX	HELIX	-67.2404	-16.7042	174.555	-64.937	-92.5112	-76.8842	171.583	-58.4073	-25.9727	177.088	Alpha-R	Alpha-R	Alpha-R	80.5235	3.12848	3.51917	ALA	VAL	3.51917	3.12848
5Z3E	1.1	A	173	N/A	N/A	N/A	-159.296	172.51	174.061	68.6229	-66.817	149.552	176.887	-55.3536	146.696	172.897	Beta	Beta	Beta	97.5254	4.17762	3.00248	PRO	TYR	3.00248	4.17762
5Z3E	1.1	A	202	HELIX	HELIX	HELIX	-92.6917	116.272	-176.033	177.309	-58.0129	-36.871	179.532	-110.928	11.5804	-177.176	Beta	Alpha-R	N/A	108.705	3.39483	2.84264	THR	ALA	2.84264	3.39483
6AR0	1.08	A	10	SHEET	N/A	SHEET	-79.3653	123.656	178.63	-178.175	-81.3705	163.005	-173.951	-118.406	143.171	-171.913	Beta	Beta	Beta	92.6286	3.21301	3.3095	THR	ARG	3.3095	3.21301
6AR0	1.08	A	95	SHEET	SHEET	N/A	-124.308	122.931	-176.213	-67.8868	-69.1249	135.588	175.522	-59.2872	135.635	-179.556	Beta	Beta	Beta	106.835	3.90368	3.01621	PRO	GLU	3.01621	3.90368
6AR0	1.08	A	37	N/A	N/A	N/A	-137.106	80.4669	-175.523	-53.9673	-106.769	161.811	177.831	74.8932	-6.91357	-178.636	Beta	Beta	Alpha-L	103.849	4.01893	3.64987	ARG	ARG	3.64987	4.01893
6AR0	1.08	A	120	N/A	SHEET	N/A	-118.249	172.616	-179.545	62.2181	-90.4732	122.713	177.242	-81.458	169.372	179.632	Beta	Beta	Beta	125.302	3.86276	3.35591	GLY	ILE	3.35591	3.86276
6AR0	1.08	A	48	N/A	N/A	N/A	-159.989	123.511	-168.598	178.394	-63.102	-34.9773	-168.236	-78.7701	94.6037	-174.838	Beta	Alpha-R	Beta	113.064	4.22067	2.94216	ASP	LYS	2.94216	4.22067
6BEV	1.04	A	79	N/A	N/A	SHEET	-122.269	-152.637	179.87	64.0309	-90.1428	-17.3626	-175.836	-156.692	155.135	165.071	Beta	Alpha-R	Beta	117.49	3.96092	3.4114	PHE	GLN	3.4114	3.96092
6BG3	1.05	A	1090	N/A	HELIX	HELIX	-61.3471	-44.88	179.212	-68.9508	-59.7558	-43.5157	-178.751	-59.0457	-47.2665	177.222	Alpha-R	Alpha-R	Alpha-R	100.452	2.94565	2.87998	PHE	ASP	2.87998	2.94565
6BG3	1.05	A	1131	N/A	N/A	N/A	-120.475	134.638	174.7	-66.3357	-122.022	15.1546	-179.382	67.4736	33.913	-174.895	Beta	N/A	Alpha-L	136.929	3.87443	3.92676	GLY	ASP	3.92676	3.87443
6BG3	1.05	A	1115	N/A	N/A	N/A	-86.1548	-7.82795	176.974	75.5256	-156.029	166.827	-177.168	-70.1914	-18.8407	-173.356	Alpha-R	Beta	Alpha-R	111.074	3.29952	4.12699	GLN	GLU	4.12699	3.29952
6BQA	1.03	A	93	HELIX	HELIX	HELIX	-71.4667	-41.4025	178.253	-64.1374	-61.7212	-40.1352	177.06	-55.7694	-45.4122	-178.593	Alpha-R	Alpha-R	Alpha-R	103.704	3.09249	2.96343	MET	ASP	2.96343	3.09249
6C1X	1.05	A	81	SHEET	SHEET	N/A	-123.276	164.512	175.077	-60.1313	-167.349	169.072	178.033	78.1427	19.345	-176.662	Beta	Beta	Alpha-L	113.94	3.90401	4.20604	GLY	GLY	4.20604	3.90401
6C1X	1.05	A	97	SHEET	SHEET	SHEET	-154.445	159.078	-176.635	59.8426	-126.991	142.428	178.822	-63.1582	146.849	174.337	Beta	Beta	Beta	117.403	4.1208	3.93544	PRO	ALA	3.93544	4.1208
6C1X	1.05	A	69	SHEET	SHEET	SHEET	-150.514	139.46	170.494	62.0317	-55.7413	141.336	173.332	-151.517	143.183	-179.704	Beta	Beta	Beta	97.499	4.10994	2.88812	ALA	LEU	2.88812	4.10994
6DYF	1.1	A	101	HELIX	HELIX	HELIX	-66.5993	-41.2793	178.475	-179.017	-59.0961	-38.4666	-178.467	-67.9301	-41.2587	177.077	Alpha-R	Alpha-R	Alpha-R	101.593	2.97074	2.84446	ALA	HIS	2.84446	2.97074
6DYF	1.1	A	98	HELIX	HELIX	HELIX	-55.0535	-49.8919	-173.946	-46.6997	-73.0031	-32.204	-179.402	-75.372	-36.2795	171.023	Alpha-R	Alpha-R	Alpha-R	95.3763	2.80265	3.05464	HIS	ASN	3.05464	2.80265
6E1Z	1.1	B	205	SHEET	SHEET	N/A	-78.5092	129.912	175.718	-176.469	-89.0351	-37.0125	-170.976	-89.727	152.369	-176.581	Beta	Alpha-R	Beta	106.839	3.17914	3.50945	GLN	LEU	3.50945	3.17914
6E1Z	1.1	A	163	SHEET	SHEET	N/A	-77.6518	117.046	179.772	-171.475	-83.678	-39.5058	-176.449	-75.662	140.399	170.602	Beta	Alpha-R	Beta	104.753	3.22294	3.36359	LYS	LEU	3.36359	3.22294
6E1Z	1.1	B	195	SHEET	SHEET	SHEET	-110.673	134.542	178.759	-69.6582	-131.053	147.392	178.249	-107.344	146.786	158.646	Beta	Beta	Beta	119.733	3.93131	3.9802	LEU	ARG	3.9802	3.93131
6E1Z	1.1	A	261	N/A	N/A	N/A	-83.4869	80.7376	-175.746	-65.4618	-85.4853	128.488	176.624	-99.4336	154.615	173.303	Beta	Beta	Beta	117.991	3.38136	3.27985	TYR	ILE	3.27985	3.38136
6E1Z	1.1	A	309	SHEET	N/A	SHEET	-112.949	128.555	-177.273	-64.6497	-64.7114	146.158	-172.01	-146.381	149.189	-178.875	Beta	Beta	Beta	94.105	3.81867	2.94277	ALA	HIS	2.94277	3.81867
6E1Z	1.1	B	134	SHEET	SHEET	SHEET	-148.81	153.669	-176.245	48.3202	-160.523	157.398	177.012	-105.168	-28.2882	-171.059	Beta	Beta	Alpha-R	116.958	4.10102	4.19876	PHE	CYS	4.19876	4.10102
6E1Z	1.1	B	135	SHEET	SHEET	SHEET	-160.523	157.398	177.012	55.221	-165.475	150.267	168.696	-148.81	153.669	-176.245	Beta	Beta	Beta	114.146	4.19876	4.22142	CYS	ASN	4.22142	4.19876
6E1Z	1.1	A	121	SHEET	SHEET	N/A	-77.181	116.006	179.61	176.808	-82.2988	-64.4151	61.399	-86.4078	144.91	172.084	Beta	Alpha-R	Beta	104.95	3.29208	3.34614	LYS	LEU	3.34614	3.29208
6E1Z	1.1	A	248	SHEET	SHEET	SHEET	-79.3524	126.147	179.718	178.097	-97.0033	-34.3555	-172.814	-124.702	147.456	178.613	Beta	Alpha-R	Beta	110.24	3.23043	3.59401	LYS	LEU	3.59401	3.23043
6EKZ	1.08	A	36	HELIX	HELIX	N/A	-102.895	110.579	177.78	179.206	-66.6882	-24.8164	176.554	-82.2387	-6.08876	-176.555	Beta	Alpha-R	Alpha-R	115.067	3.65221	3.00876	PRO	PRO	3.00876	3.65221
6EUW	1	A	409	HELIX	HELIX	HELIX	-65.2713	-28.8117	174.401	62.3989	-71.1489	-45.9499	176.32	-59.1789	-35.3583	-179.226	Alpha-R	Alpha-R	Alpha-R	95.7148	2.91691	3.19626	ASP	MET	3.19626	2.91691
6EXX	1.1	A	404	N/A	HELIX	N/A	-87.6036	67.1124	-166.448	-166.882	-103.887	-178.39	-175.694	-79.7863	-15.1185	174.88	Beta	Beta	Alpha-R	89.9553	3.36107	3.61559	VAL	ASN	3.61559	3.36107
6EXX	1.1	A	413	HELIX	HELIX	HELIX	-64.375	-45.3358	177.648	-70.4518	-58.1788	-41.0339	-177.596	-59.0878	-43.0613	178.912	Alpha-R	Alpha-R	Alpha-R	103.787	2.95305	2.88977	LEU	HIS	2.88977	2.95305
6FIH	1.08	A	313	SHEET	N/A	SHEET	-160.254	121.829	177.369	-178.806	-88.0929	114.082	179.915	-137.581	147.017	169.956	Beta	Beta	Beta	131.44	4.20485	3.40027	PHE	GLU	3.40027	4.20485
6FIH	1.08	A	140	HELIX	HELIX	HELIX	-65.1378	-39.2439	177.449	-76.3592	-59.4279	-42.6143	-178.405	-63.3825	-46.8074	179.07	Alpha-R	Alpha-R	Alpha-R	97.9718	3.00497	2.85538	THR	GLN	2.85538	3.00497
6FIH	1.08	A	34	N/A	N/A	SHEET	-69.9181	131.488	-177.616	-54.3383	80.2202	0.369191	178.202	-91.7243	108.441	-177.26	Beta	Alpha-L	Beta	135.184	3.08308	3.31144	SER	GLY	3.31144	3.08308
6FIY	1.09	B	252	SHEET	N/A	SHEET	-157.352	146.219	177.365	-167.93	-70.0775	-20.0921	171.802	-114.647	145.044	178.138	Beta	Alpha-R	Beta	119.828	4.14246	3.07379	TYR	ALA	3.07379	4.14246
6FIY	1.09	B	13	N/A	N/A	N/A	-64.6385	139.224	-175.314	-64.6026	-86.1008	-15.2409	-170.692	61.8084	27.9649	167.047	Beta	Alpha-R	Alpha-L	122.704	2.84087	3.27354	HIS	ARG	3.27354	2.84087
6FIY	1.09	A	249	SHEET	SHEET	SHEET	-146.09	126.363	177.864	172.297	-140.144	147.188	176.793	-81.6537	132.092	-179.372	Beta	Beta	Beta	120.632	4.09338	4.06875	PHE	ALA	4.06875	4.09338
6FJ7	1.05	A	33	HELIX	HELIX	HELIX	-65.8376	-32.717	173.125	-71.712	-62.9851	-43.1155	179.091	-59.025	-46.0854	-179.931	Alpha-R	Alpha-R	Alpha-R	101.49	3.02276	2.98594	VAL	ALA	2.98594	3.02276
6FJN	0.97	A	199	N/A	N/A	N/A	-148.386	150.334	175.149	-166.764	-102.289	109.855	165.936	-141.718	3.23477	-164.343	Beta	Beta	N/A	120.995	4.03681	3.74297	ASN	LYS	3.74297	4.03681
6FJN	0.97	A	216	SHEET	N/A	SHEET	-122.585	68.0853	-179.314	-59.4518	66.3789	11.0412	-155.209	-72.9596	122.456	174.082	Beta	Alpha-L	Beta	111.541	4.0026	2.8825	LYS	GLY	2.8825	4.0026
6FJN	0.97	A	337	HELIX	N/A	HELIX	-55.8723	143.385	173.224	66.9843	-85.2412	-32.2034	-176.733	71.5907	16.3425	-178.222	Beta	Alpha-R	Alpha-L	111.003	2.87174	3.45723	GLY	ALA	3.45723	2.87174
6FPO	1.05	S	190	N/A	N/A	HELIX	-91.5949	129.667	179.934	-177.741	-69.0683	-7.71205	173.3	-133.963	26.8607	-176.072	Beta	Alpha-R	N/A	127.216	3.37685	3.08514	LYS	TYR	3.08514	3.37685
6FPO	1.05	T	221	HELIX	HELIX	HELIX	-51.6363	129.255	178.554	-174.544	-101.249	14.6613	174.971	101.655	5.89927	-177.997	Beta	Alpha-R	Alpha-L	142.111	2.74066	3.64351	GLY	LYS	3.64351	2.74066
6FPO	1.05	T	88	HELIX	SHEET	HELIX	-146.991	109.009	-167.712	-171.904	-115.457	132.365	174.957	-68.3103	-12.0248	174.793	Beta	Beta	Alpha-R	120.663	4.11486	3.79654	PHE	ILE	3.79654	4.11486
6FPO	1.05	T	149	HELIX	HELIX	HELIX	-126.988	75.2952	-6.85937	-169.941	-87.5667	177.8	166.915	120.805	155.737	-173.484	Beta	Beta	N/A	70.1759	3.91465	4.29882	GLY	PRO	4.29882	3.91465
6FPO	1.05	M	76	SHEET	N/A	SHEET	-158.481	133.871	177.402	-168.487	-93.9634	-8.47684	176.302	-55.2888	-38.752	-173.474	Beta	Alpha-R	Alpha-R	126.911	4.14969	3.54527	ILE	GLY	3.54527	4.14969
6FPO	1.05	M	576	HELIX	HELIX	N/A	-128.405	100.251	-169.693	-166.454	-80.6031	-29.0637	173.993	-62.0293	136.81	175.17	Beta	Alpha-R	Beta	108.84	3.95505	3.18036	PRO	LEU	3.18036	3.95505
6FPO	1.05	S	120	HELIX	HELIX	HELIX	55.9096	-151.823	-157.556	-153.677	-65.501	-35.3438	-179.452	146.503	-47.7794	-179.207	PPII-R	Alpha-R	N/A	105.252	2.96376	2.86039	GLY	VAL	2.86039	2.96376
6FPO	1.05	M	579	HELIX	HELIX	HELIX	-56.789	-46.8801	-166.85	-89.4773	-63.3443	-31.6556	-171.864	-64.6988	-43.029	172.63	Alpha-R	Alpha-R	Alpha-R	112.989	2.86489	2.89585	ALA	SER	2.89585	2.86489
6FPO	1.05	S	115	HELIX	HELIX	HELIX	-57.9987	-55.5322	-174.672	-71.2032	-69.3444	-33.6433	-176.319	-63.5481	-31.1112	177.518	Alpha-R	Alpha-R	Alpha-R	109.268	2.79468	3.00542	THR	ALA	3.00542	2.79468
6FPO	1.05	L	454	HELIX	HELIX	HELIX	-64.4856	-39.1747	177.304	-70.8254	-60.1812	-43.8679	179.305	-59.649	-44.571	-179.045	Alpha-R	Alpha-R	Alpha-R	99.9932	2.98494	2.95344	LEU	ARG	2.95344	2.98494
6FPO	1.05	M	116	HELIX	HELIX	HELIX	-61.123	-49.935	-176.36	-70.6816	-62.4738	-53.1734	-172.675	-58.4448	-47.7502	-178.757	Alpha-R	Alpha-R	Alpha-R	96.0452	2.88475	2.97005	TRP	HIS	2.97005	2.88475
6FPO	1.05	L	300	N/A	SHEET	HELIX	-143.01	118.606	179.652	-66.8636	-135.358	148.862	-171.473	-128.144	-65.34	-167.953	Beta	Beta	N/A	116.514	4.07781	4.06277	LYS	VAL	4.06277	4.07781
6FPO	1.05	L	528	SHEET	SHEET	SHEET	-115.767	137.26	170.6	-56.4057	-126.599	117.913	-162.886	-120.465	133.057	-179.179	Beta	Beta	Beta	126.389	3.81334	3.96229	GLN	VAL	3.96229	3.81334
6FPO	1.05	S	230	N/A	N/A	N/A	-65.7617	-32.2569	-176.414	-50.5568	-84.0183	-3.43349	-178.246	-111.491	13.0345	-167.744	Alpha-R	Alpha-R	N/A	130.821	2.90006	3.34919	ALA	SER	3.34919	2.90006
6FPO	1.05	S	20	SHEET	SHEET	SHEET	-69.4873	-38.3801	175.594	-48.8506	-62.3881	-44.1574	175.887	-67.6403	-30.5382	-176.432	Alpha-R	Alpha-R	Alpha-R	102.666	2.9492	2.97901	CYS	THR	2.97901	2.9492
6FPO	1.05	L	239	N/A	N/A	N/A	-83.4243	75.2817	179.22	53.7595	-55.853	145.351	-176.093	-86.5998	-5.2802	-175.564	Beta	Beta	Alpha-R	89.4025	3.32556	2.83994	PRO	ALA	2.83994	3.32556
6FPO	1.05	S	19	SHEET	SHEET	SHEET	-67.6403	-30.5382	-176.432	54.9939	-69.4873	-38.3801	175.594	80.9234	12.3838	-178.913	Alpha-R	Alpha-R	Alpha-L	104.686	2.90788	2.9492	THR	CYS	2.9492	2.90788
6FPO	1.05	L	499	SHEET	SHEET	SHEET	-159.206	164.188	178.659	56.7644	-144.776	156.911	-178.957	-137.888	129.246	177.261	Beta	Beta	Beta	114.53	4.18565	4.07971	GLU	ARG	4.07971	4.18565
6FPO	1.05	T	252	N/A	HELIX	HELIX	-70.4186	-13.5494	174.116	81.8305	-85.4198	-6.53751	-174.193	89.33	23.3776	-159.731	Alpha-R	Alpha-R	Alpha-L	129.765	3.0603	3.42506	GLY	ALA	3.42506	3.0603
6FPO	1.05	T	17	SHEET	SHEET	N/A	-109.528	-5.93719	179.78	87.9585	80.0791	8.05712	179.58	-167.642	172.04	174.037	Alpha-R	Alpha-L	Beta	132.589	3.81987	3.40674	GLU	THR	3.40674	3.81987
6FPO	1.05	L	49	SHEET	SHEET	SHEET	-132.98	122.629	169.889	167.929	-86.2507	124.516	-171.067	-102.057	126.743	-176.196	Beta	Beta	Beta	126.269	4.00968	3.36161	SER	GLY	3.36161	4.00968
6FPO	1.05	T	215	HELIX	HELIX	HELIX	-63.9029	146.91	-175.475	169.943	-98.9138	10.5187	-179.297	-71.0181	166.776	-175.731	Beta	Alpha-R	Beta	139.747	2.98121	3.6692	TYR	LEU	3.6692	2.98121
6FPO	1.05	T	249	HELIX	HELIX	HELIX	-56.9383	136.953	175.393	175.756	-82.8744	-16.1464	-172.369	-60.232	154.344	168.568	Beta	Alpha-R	Beta	125.23	2.90571	3.43522	GLY	LEU	3.43522	2.90571
6FPO	1.05	M	33	SHEET	SHEET	SHEET	-126.12	138.044	170.199	177.467	-126.381	147.485	174.572	-122.475	137.446	173.831	Beta	Beta	Beta	117.092	3.92519	3.95163	ARG	GLU	3.95163	3.92519
6FTF	1.09	B	270	SHEET	SHEET	N/A	-97.0935	119.552	173.255	-68.3695	-65.4007	-39.3994	176.171	-66.5569	144.56	171.433	Beta	Alpha-R	Beta	104.435	3.57243	3.05944	ASP	ILE	3.05944	3.57243
6FTF	1.09	B	466	HELIX	HELIX	HELIX	-99.7765	-18.0144	179.005	56.9826	-116.934	2.2112	173.624	-65.9999	-43.4088	-171.341	Alpha-R	N/A	Alpha-R	128.745	3.3016	3.78162	MET	LEU	3.78162	3.3016
6FTF	1.09	B	326	N/A	N/A	SHEET	-125.227	5.57414	165.214	59.4189	-101.947	173.616	-179.393	-66.7139	135.605	-177.386	N/A	Beta	Beta	96.6371	3.88682	3.70691	VAL	THR	3.70691	3.88682
6FTF	1.09	B	477	HELIX	HELIX	HELIX	-57.2116	-25.4869	178.596	62.5356	-57.2191	-27.5823	-178.061	-64.9746	-13.1589	178.124	Alpha-R	Alpha-R	Alpha-R	115.174	2.84687	2.85937	ARG	ALA	2.85937	2.84687
6FTF	1.09	B	424	SHEET	SHEET	SHEET	-171.896	-179.042	171.436	70.1859	-121.435	158.997	170.656	-94.4979	-49.9508	-176.221	Beta	Beta	Alpha-R	108.701	4.22329	3.98039	VAL	GLU	3.98039	4.22329
6FTF	1.09	B	279	N/A	N/A	N/A	-86.4946	-83.4907	174.752	176.903	59.8204	31.2144	179.412	-110.47	10.4618	178.732	N/A	Alpha-L	N/A	112.594	3.3367	2.91573	THR	ASN	2.91573	3.3367
6FVI	1	A	1739	N/A	N/A	N/A	-113.903	147.094	177.95	-62.0561	-147.114	131.595	-13.1901	-135.157	138.274	179.229	Beta	Beta	Beta	121.74	3.78264	4.14887	ARG	SER	4.14887	3.78264
6FVI	1	A	1774	N/A	N/A	N/A	-135.066	150.49	164.531	-61.3277	-158.312	157.138	171.908	-108.551	128.91	-172.348	Beta	Beta	Beta	113.271	4.02664	4.16967	GLU	HIS	4.16967	4.02664
6G1I	0.99	A	184	HELIX	HELIX	HELIX	-91.7618	-24.8919	-177.266	-64.504	73.2138	20.428	175.9	-76.8521	-51.7138	-166.647	Alpha-R	Alpha-L	Alpha-R	119.793	3.39726	3.12838	VAL	GLY	3.12838	3.39726
6GKE	1.08	A	193	SHEET	SHEET	SHEET	-129.622	141.056	167.937	-51.3676	-128.518	123.556	175.464	-120.683	140.728	-165.494	Beta	Beta	Beta	125.855	3.9625	4.02746	HIS	TRP	4.02746	3.9625
6GKE	1.08	A	80	SHEET	SHEET	SHEET	-159.951	-173.553	179.853	64.2258	-127.35	137.381	176.499	-100.507	142.646	-176.726	Beta	Beta	Beta	119.984	4.23734	3.99221	TYR	VAL	3.99221	4.23734
6GX2	1.07	A	196	HELIX	HELIX	HELIX	-60.3024	16.3618	147.937	-86.0331	-119.436	19.3143	-150.632	-88.9663	-25.785	173.529	Alpha-R	N/A	Alpha-R	57.7456	3.28663	4.21441	PHE	GLU	4.21441	3.28663
6GX2	1.07	A	284	HELIX	HELIX	HELIX	-66.1479	-42.4303	177.562	-72.2091	-60.7298	-47.7256	-178.442	-61.4063	-44.0109	-177.957	Alpha-R	Alpha-R	Alpha-R	98.0526	2.95319	2.93912	ALA	HIS	2.93912	2.95319
6GX2	1.07	A	209	SHEET	SHEET	SHEET	-121.452	113.899	-170.188	-55.8097	-133.367	159.484	166.687	-121.605	124.306	-168.526	Beta	Beta	Beta	114.496	3.84154	3.99505	VAL	VAL	3.99505	3.84154
6GX2	1.07	A	80	N/A	N/A	N/A	-71.6239	-26.6465	172.801	59.6503	-140.08	-115.372	-137.957	-65.3199	140.795	-178.476	Alpha-R	N/A	Beta	116.515	3.32443	4.08966	PRO	ARG	4.08966	3.32443
6GY5	1.09	A	327	SHEET	N/A	SHEET	-153.139	127.337	170.352	-177.579	45.8597	51.0099	171.91	-136.96	142.162	170.537	Beta	Alpha-L	Beta	101.618	4.16168	2.77506	TRP	SER	2.77506	4.16168
6GY5	1.09	A	502	SHEET	SHEET	SHEET	-133.265	142.918	174.531	-162.745	-162.743	152.2	171.477	-109.995	142.959	-179.344	Beta	Beta	Beta	113.57	4.05749	4.20316	GLY	ALA	4.20316	4.05749
6GY5	1.09	A	402	N/A	N/A	N/A	-60.5907	150.147	-178.145	-68.3327	-138.175	98.3818	-178.807	-138.213	167.982	168.523	Beta	Beta	Beta	137.48	2.88959	4.08463	THR	ARG	4.08463	2.88959
6GY5	1.09	A	426	N/A	N/A	N/A	-79.3926	141.475	-170.375	-67.7438	-106.56	135.229	165.146	-144.095	158.988	167.367	Beta	Beta	Beta	122.702	3.33362	3.6401	SER	LEU	3.6401	3.33362
6GY5	1.09	A	356	N/A	N/A	N/A	-101.92	158.233	-174.722	74.2386	61.1192	36.0322	-175.518	-143.809	109.787	164.713	Beta	Alpha-L	Beta	107.376	3.71565	2.92359	ARG	GLY	2.92359	3.71565
6H40	1.05	A	49	N/A	HELIX	N/A	-94.4276	5.36929	175.985	-63.2178	93.6892	15.6295	-176.712	56.1948	-123.696	-178.938	Alpha-R	Alpha-L	PPII-R	121.571	3.49833	3.53281	TYR	GLY	3.53281	3.49833
6HAV	1.06	A	81	HELIX	HELIX	HELIX	-51.7938	-41.3051	-176.01	-85.5363	-65.0394	-42.6588	176.382	-86.8226	109.83	-179.269	Alpha-R	Alpha-R	Beta	101.803	2.78092	2.9492	ASP	LYS	2.9492	2.78092
6HAV	1.06	A	322	HELIX	HELIX	HELIX	-86.6574	75.9352	-179.708	-71.2419	-150.476	162.689	170.832	-105.981	6.4684	-175.094	Beta	Beta	Alpha-R	113.106	3.30814	4.13686	MET	PHE	4.13686	3.30814
6HAV	1.06	A	250	HELIX	HELIX	HELIX	-108.74	-27.8381	-177.131	-57.4097	-73.8052	178.893	169.565	-85.1329	-36.9116	-165.284	Alpha-R	Beta	Alpha-R	81.1738	3.64812	3.18642	VAL	ASP	3.18642	3.64812
6HAV	1.06	A	17	HELIX	HELIX	HELIX	-72.3606	-17.5214	173.471	75.7388	78.6727	1.59699	-170.898	-61.785	-32.388	-178.168	Alpha-R	Alpha-L	Alpha-R	133.149	3.03961	3.25222	ALA	GLY	3.25222	3.03961
6HAV	1.06	A	176	N/A	N/A	N/A	-75.5578	-3.29699	-179.723	77.2339	-90.76	-3.41893	175.562	-134.614	-144.23	-157.657	Alpha-R	Alpha-R	Beta	127.702	3.1394	3.40819	ALA	THR	3.40819	3.1394
6HAV	1.06	A	10	N/A	HELIX	N/A	-134.053	135.37	-175.663	177.561	-77.766	-11.5075	-166.321	85.5307	165.784	172.417	Beta	Alpha-R	N/A	125.849	4.03372	3.19364	GLY	TYR	3.19364	4.03372
6HSA	0.92	A	38	HELIX	HELIX	HELIX	-63.9264	-37.9575	175.813	-70.5883	-59.5454	-41.6758	-178.941	-64.3714	-46.8775	-178.97	Alpha-R	Alpha-R	Alpha-R	100.391	2.91999	2.82206	TYR	LYS	2.82206	2.91999
6HSA	0.92	A	47	SHEET	SHEET	SHEET	-101.444	127.218	-178.157	-67.441	-128.968	140.956	173.687	-124.961	130.301	172.021	Beta	Beta	Beta	117.636	3.66451	3.98215	GLU	TYR	3.98215	3.66451
6HSA	0.92	A	121	HELIX	N/A	HELIX	-93.8918	154.861	179.371	-66.2958	-74.9192	-25.6776	179.79	-104.076	3.83309	175.967	Beta	Alpha-R	Alpha-R	110.276	3.48857	3.17155	VAL	ASN	3.17155	3.48857
6IFP	1	A	78	N/A	HELIX	SHEET	-95.8717	123.778	-173.918	167.121	-58.5341	-53.1434	-179.08	-139.884	159.384	162.836	Beta	Alpha-R	Beta	94.7578	3.628	2.82461	LYS	THR	2.82461	3.628
6J64	0.95	A	84	HELIX	HELIX	HELIX	-65.2031	-38.6788	178.825	-69.9372	-62.268	-40.8009	177.505	-69.6335	-38.5155	177.226	Alpha-R	Alpha-R	Alpha-R	102.4	2.99332	2.94166	LYS	ALA	2.94166	2.99332
6J64	0.95	B	38	SHEET	SHEET	N/A	-157.092	172.934	-177.959	72.892	-145.805	134.732	175.669	-107.891	-20.7787	-171.249	Beta	Beta	Alpha-R	119.512	4.12117	4.15002	ARG	LEU	4.15002	4.12117
6JPT	0.96	A	25	SHEET	SHEET	SHEET	-122.555	135.048	178.985	-64.6664	-132.365	130.907	-176.897	-131.87	132.749	172.153	Beta	Beta	Beta	124.02	3.89927	4.02427	VAL	THR	4.02427	3.89927
6JPT	0.96	A	119	HELIX	N/A	HELIX	-95.2856	24.0501	-178.679	-64.6294	-59.9632	131.792	-179.398	-58.428	-31.5774	-179.945	Alpha-R	Beta	Alpha-R	106.254	3.57709	2.85095	VAL	GLN	2.85095	3.57709
6JPT	0.96	A	17	N/A	N/A	SHEET	49.1527	48.4849	176.985	-61.9538	83.2255	-9.56134	-173.843	-126.876	112.42	-178.152	Alpha-L	Alpha-L	Beta	142.103	2.75376	3.37094	VAL	GLY	3.37094	2.75376
6K9J	0.98	A	17	N/A	N/A	N/A	-119.434	-1.74226	-172.506	-61.1911	-145.267	142.561	162.431	-52.1702	-34.7498	-175.627	N/A	Beta	Alpha-R	121.911	3.91985	4.10954	GLN	HIS	4.10954	3.91985
6K9J	0.98	A	14	HELIX	N/A	HELIX	-119.167	-34.9421	-172.254	-45.3127	-59.9784	-24.8413	176.254	-113.357	-22.9747	-167.61	N/A	Alpha-R	N/A	115.981	3.85692	2.94849	LYS	ALA	2.94849	3.85692
6KGI	1.04	B	163	SHEET	SHEET	SHEET	-137.669	121.765	178.825	-175.143	-87.5017	163.543	176.325	-93.4874	142.564	-179.216	Beta	Beta	Beta	94.0485	4.06985	3.33616	VAL	THR	3.33616	4.06985
6KGI	1.04	B	177	N/A	N/A	N/A	-57.8111	131.751	-179.419	-170.334	87.7463	-1.07011	174.33	-97.8776	8.06869	177.641	Beta	Alpha-L	Alpha-R	133.855	2.83186	3.37197	ASP	GLY	3.37197	2.83186
6KGI	1.04	B	139	N/A	N/A	N/A	-85.8645	-37.3112	-176.379	-72.8298	-68.4863	132.756	177.727	-74.0951	-37.1606	-171.733	Alpha-R	Beta	Alpha-R	109.075	3.26629	2.9913	GLU	GLY	2.9913	3.26629
6KGI	1.04	B	141	N/A	N/A	N/A	-63.3533	-30.3195	172.151	-72.4423	-150.862	-179.447	-174.249	-68.4863	132.756	177.727	Alpha-R	Beta	Beta	107.696	2.94676	4.17018	GLY	ASP	4.17018	2.94676
6KGI	1.04	B	151	N/A	N/A	N/A	-102.023	-38.546	-174.948	-71.4168	-56.1946	125.911	-178.537	-77.2809	-20.7445	-175.339	Alpha-R	Beta	Alpha-R	106.883	3.64974	2.78104	HIS	PHE	2.78104	3.64974
6KGI	1.04	B	145	N/A	N/A	N/A	-87.1418	126.919	-169.501	-62.4335	-139.74	159.353	178.39	-108.595	-1.62051	-175.774	Beta	Beta	Alpha-R	115.426	3.32855	4.0454	THR	VAL	4.0454	3.32855
6KGI	1.04	B	148	SHEET	N/A	SHEET	-72.7678	166.68	-175.107	78.4541	-65.5709	-27.0067	-178.518	-130.631	132.218	175.636	Beta	Alpha-R	Beta	117.32	3.14131	2.97414	LEU	ILE	2.97414	3.14131
6KGI	1.04	B	167	N/A	N/A	SHEET	-68.2065	118.799	-175.449	171.373	-113.51	0.137002	179.677	-127.484	129.663	176.568	Beta	N/A	Beta	130.107	3.04439	3.76678	ILE	THR	3.76678	3.04439
6KGI	1.04	B	123	N/A	N/A	N/A	-62.4873	-59.9363	176.067	173.639	71.9051	9.17255	179.38	-72.4207	150.765	178.97	Alpha-R	Alpha-L	Beta	129.406	2.93547	3.16706	ASN	GLY	3.16706	2.93547
6KGI	1.04	B	136	SHEET	N/A	SHEET	-132.445	120.723	-177.174	175.491	-57.2979	-47.0173	-173.949	-127.317	153.111	174.032	Beta	Alpha-R	Beta	100.32	4.03254	2.81578	ARG	HIS	2.81578	4.03254
6KGI	1.04	B	175	N/A	N/A	N/A	-69.0063	134.667	-177.645	176.702	-97.8776	8.06869	177.641	-139.78	157.603	176.052	Beta	Alpha-R	Beta	139.202	3.1139	3.60263	ILE	ASP	3.60263	3.1139
6KGI	1.04	B	189	HELIX	HELIX	N/A	-52.7764	130.983	179.733	179.826	-60.0566	-33.7242	-177.395	-128.447	94.6546	-171.083	Beta	Alpha-R	Beta	108.312	2.76589	2.86868	HIS	LYS	2.86868	2.76589
6KP5	1.1	A	59	SHEET	SHEET	SHEET	-126.552	110.437	179.577	-52.3229	-123.351	144.213	160.888	-126.964	130.392	-174.445	Beta	Beta	Beta	112.931	3.98337	3.98636	VAL	ILE	3.98636	3.98337
6L27	0.77	A	70	HELIX	HELIX	HELIX	-59.2549	-15.1054	176.904	50.4109	-91.871	8.01932	175.781	-70.9526	-6.22024	164.232	Alpha-R	Alpha-R	Alpha-R	136.86	3.10705	3.50104	GLN	PHE	3.50104	3.10705
6L8G	1	B	84	N/A	N/A	SHEET	-136.691	18.8045	-173.271	67.2971	-164.997	136.803	-175.697	-152.297	147.21	168.296	N/A	Beta	Beta	116.728	4.12701	4.19834	SER	LYS	4.19834	4.12701
6LK1	0.9	B	17	SHEET	N/A	SHEET	-141.286	116.711	176.538	-172.066	-69.4557	161.097	-179.199	-100.65	137.583	174.198	Beta	Beta	Beta	87.9666	4.04974	3.02146	GLU	PRO	3.02146	4.04974
6LK1	0.9	B	84	SHEET	SHEET	N/A	-153.848	166.626	179.246	60.4282	-128.497	125.229	-174.783	-57.301	139.197	-169.89	Beta	Beta	Beta	125.642	4.12138	4.01518	ASP	THR	4.01518	4.12138
6LK1	0.9	B	46	N/A	SHEET	N/A	-93.0535	15.6741	-172.533	68.4985	-61.0884	136.469	168.647	-60.3084	-36.8311	-174.505	Alpha-R	Beta	Alpha-R	100.764	3.53716	2.80865	SER	ALA	2.80865	3.53716
6LK1	0.9	B	76	HELIX	HELIX	N/A	-68.8861	-19.5692	-176.762	70.9626	-129.342	22.2173	-178.629	-60.3513	-23.3499	179.064	Alpha-R	N/A	Alpha-R	141.718	3.12553	4.04134	THR	VAL	4.04134	3.12553
6LK1	0.9	B	38	N/A	N/A	N/A	-67.9159	-38.2351	-174.277	78.0915	61.9644	24.5536	-173.245	-144.714	-76.1686	-170.293	Alpha-R	Alpha-L	N/A	121.711	3.02493	3.07843	SER	ARG	3.07843	3.02493
6LK1	0.9	A	43	N/A	N/A	N/A	-153.008	-174.013	179.507	84.7559	-112.516	5.26045	-171.326	-117.879	22.1783	178.322	Beta	N/A	N/A	132.616	4.17165	3.78547	ALA	SER	3.78547	4.17165
6MM2	1.04	A	89	SHEET	SHEET	N/A	-174.112	133.18	170.721	-176.121	-138.815	-156.24	-147.786	-57.0109	136.756	-170.509	Beta	Beta	Beta	106.541	4.2413	4.12761	SER	ILE	4.12761	4.2413
6MU0	1.1	A	76	HELIX	HELIX	HELIX	-68.3815	-45.7299	175.733	-178.926	-57.1929	-49.3427	-176.305	-63.9602	-31.0681	177.747	Alpha-R	Alpha-R	Alpha-R	97.4422	3.06394	2.89016	VAL	MET	2.89016	3.06394
6MU0	1.1	A	109	SHEET	SHEET	SHEET	-110.313	133.562	-169.953	-59.2189	-130.764	153.318	176.617	-104.154	124.371	-178.833	Beta	Beta	Beta	114.138	3.76797	4.01143	LEU	LEU	4.01143	3.76797
6N59	1.02	A	107	HELIX	HELIX	N/A	-92.5399	129.721	178.372	-178.17	-71.178	-31.9646	-176.986	-150.661	43.6835	-175.863	Beta	Alpha-R	N/A	110.334	3.45072	3.05082	ASN	GLU	3.05082	3.45072
6N59	1.02	A	355	N/A	HELIX	N/A	-143.894	139.237	169.972	-177.514	-87.7553	-31.0711	-174.604	-84.8239	23.0545	-156.493	Beta	Alpha-R	Alpha-R	111.188	4.05668	3.49245	PRO	THR	3.49245	4.05668
6N59	1.02	A	101	N/A	N/A	N/A	-79.1821	141.579	-178.754	-174.556	-77.5062	0.517281	171.035	-95.1027	8.06252	-171.351	Beta	Alpha-R	Alpha-R	132.789	3.18881	3.20488	PRO	ASN	3.20488	3.18881
6N59	1.02	A	200	HELIX	N/A	HELIX	-81.0788	130.631	-177.57	-174.071	-78.6003	-11.7005	-169.981	-78.3002	-13.4211	-169.742	Beta	Alpha-R	Alpha-R	126.397	3.16014	3.25387	ALA	PRO	3.25387	3.16014
6N59	1.02	A	39	N/A	N/A	N/A	-144.747	142.851	171.336	-156.218	-97.801	-174.317	-179.484	66.4876	20.952	176.834	Beta	Beta	Alpha-L	89.5688	4.08069	3.56767	ASN	ASN	3.56767	4.08069
6N59	1.02	A	503	HELIX	HELIX	HELIX	-62.3798	-24.0288	177.202	-61.1968	-57.9175	-24.5038	176.728	82.1824	-166.705	-172.19	Alpha-R	Alpha-R	PPII-R	116.972	2.94538	2.80093	GLY	VAL	2.80093	2.94538
6N59	1.02	A	499	N/A	N/A	N/A	-94.3503	131.598	176.112	-58.7543	-65.2799	125.661	-169.949	-73.8352	-33.3101	-175.637	Beta	Beta	Alpha-R	111.39	3.49808	3.02016	ALA	HIS	3.02016	3.49808
6N59	1.02	A	98	N/A	N/A	N/A	-74.2754	-22.8229	-173.894	-50.8033	-49.6477	-53.7429	-178.792	-139.816	76.8153	-169.257	Alpha-R	Alpha-R	Beta	97.8106	3.08963	2.75769	LYS	GLY	2.75769	3.08963
6N59	1.02	A	299	N/A	HELIX	N/A	-88.2159	-17.0247	179.887	44.9596	-98.1092	112.52	-179.047	-133.305	13.5102	-171.401	Alpha-R	Beta	N/A	133.52	3.40062	3.60374	SER	CYS	3.60374	3.40062
6N59	1.02	A	196	HELIX	HELIX	HELIX	-58.715	-44.2458	175.717	48.415	-57.7546	-48.4116	-176.591	-64.1333	-28.3348	171.825	Alpha-R	Alpha-R	Alpha-R	100.313	2.97272	2.91274	GLN	ILE	2.91274	2.97272
6N59	1.02	A	153	HELIX	HELIX	HELIX	-65.4707	-43.4127	-179.708	55.6034	-61.5946	-47.5802	179.422	-64.0205	-38.802	-179.93	Alpha-R	Alpha-R	Alpha-R	98.4992	3.04581	2.93403	ARG	VAL	2.93403	3.04581
6N59	1.02	A	49	N/A	SHEET	N/A	-87.2128	18.9762	178.787	65.6614	-57.449	137.382	169.799	-68.8375	-23.1861	175.673	Alpha-R	Beta	Alpha-R	102.451	3.4923	2.85025	ILE	THR	2.85025	3.4923
6N59	1.02	A	62	HELIX	HELIX	N/A	-69.4755	-16.6915	-178.078	67.0924	-136.504	22.2993	177.779	-64.6662	-26.939	-172.699	Alpha-R	N/A	Alpha-R	137.359	3.01382	4.07214	ALA	ASP	4.07214	3.01382
6N59	1.02	A	193	N/A	HELIX	N/A	-74.8476	-16.4421	176.795	70.8125	70.5824	14.6206	175.705	65.4859	24.3876	-178.057	Alpha-R	Alpha-L	Alpha-L	126.987	3.25726	3.12492	LEU	GLY	3.12492	3.25726
6N59	1.02	A	46	N/A	N/A	N/A	-72.2238	-30.0395	-178.214	71.657	65.4932	17.6178	175.078	-59.2828	141.783	-174.181	Alpha-R	Alpha-L	Beta	128.382	3.08892	3.15379	LYS	GLU	3.15379	3.08892
6N59	1.02	A	150	N/A	HELIX	N/A	-82.4845	-12.5834	178.276	74.5828	71.9959	6.26392	-177.382	56.7786	39.615	178.996	Alpha-R	Alpha-L	Alpha-L	133.461	3.36865	3.19839	LEU	GLY	3.19839	3.36865
6N59	1.02	A	34	N/A	N/A	N/A	-74.9771	-14.9552	179.915	77.8691	-78.1735	118.251	179.751	-133.949	-66.0327	-172.267	Alpha-R	Beta	N/A	126.884	3.11508	3.17965	LEU	PHE	3.17965	3.11508
6N59	1.02	A	300	HELIX	HELIX	N/A	-98.1092	112.52	-179.047	168.417	-61.7232	-31.4825	177.706	-88.2159	-17.0247	179.887	Beta	Alpha-R	Alpha-R	112.244	3.60374	3.01685	CYS	PRO	3.01685	3.60374
6N59	1.02	A	184	HELIX	HELIX	HELIX	-60.5105	135.874	-179.622	175.487	-51.1468	-41.4093	-173.669	-72.5249	167.047	165.089	Beta	Alpha-R	Beta	107.145	2.89667	2.72419	LYS	PHE	2.72419	2.89667
6N59	1.02	A	190	N/A	N/A	N/A	-45.783	140.672	178.527	177.403	-87.6794	-14.197	-178.26	-75.2797	-4.06694	174.827	Beta	Alpha-R	Alpha-R	128.321	2.80087	3.49331	ASN	LEU	3.49331	2.80087
6N59	1.02	A	147	HELIX	N/A	HELIX	-75.2433	125.812	179.763	179.245	-87.4585	-6.75035	-176.534	-106.035	-11.3852	-168.048	Beta	Alpha-R	Alpha-R	132.573	3.1543	3.50072	LYS	LEU	3.50072	3.1543
6N59	1.02	A	157	HELIX	HELIX	HELIX	-62.0682	-48.9141	-178.343	179.63	-59.1938	-46.4459	-177.627	-65.3043	-39.6181	178.276	Alpha-R	Alpha-R	Alpha-R	99.445	2.91584	2.86149	ALA	GLY	2.86149	2.91584
6NNR	1.05	A	50	N/A	HELIX	N/A	-103.424	95.8874	-158.658	-68.2247	-78.2348	-155.347	-146.6	-70.3083	121.592	-179.633	Beta	Beta	Beta	124.703	3.75062	2.87323	ARG	HIS	2.87323	3.75062
6NNR	1.05	A	192	HELIX	HELIX	HELIX	-101.539	5.03019	-177.532	-63.4924	58.1368	37.4904	177.043	-67.7635	-24.7816	-179.304	Alpha-R	Alpha-L	Alpha-R	107.945	3.67949	2.9336	GLN	ASP	2.9336	3.67949
6NNR	1.05	B	146	N/A	SHEET	N/A	-85.3412	-55.1731	170.915	-62.5727	-84.2757	94.8229	-159.084	-59.7982	128.133	177.936	Alpha-R	Beta	Beta	140.814	3.39818	3.40942	PRO	HIS	3.40942	3.39818
6NNR	1.05	B	161	SHEET	SHEET	SHEET	-142.738	139.376	171.047	175.582	-120.457	133.302	174.196	-113.463	162.161	177.497	Beta	Beta	Beta	124.498	4.1107	3.95845	SER	GLN	3.95845	4.1107
6NNR	1.05	A	168	SHEET	SHEET	SHEET	-139.469	113.751	167.001	177.755	-79.8055	101.042	-170.249	-146.548	130.553	-172.912	Beta	Beta	Beta	135.716	4.07374	3.38054	SER	ASP	3.38054	4.07374
6P2L	1.08	A	633	SHEET	SHEET	SHEET	-143.844	115.304	-178.677	-179.877	-88.8862	-23.7559	-177.535	-151.06	137.101	172.106	Beta	Alpha-R	Beta	115.898	4.09168	3.44119	TYR	GLY	3.44119	4.09168
6P2L	1.08	A	401	SHEET	N/A	SHEET	-105.188	108.274	-177.747	-179.422	-77.58	-12.4303	177.999	-128.547	129.485	171.774	Beta	Alpha-R	Beta	124.092	3.71223	3.22316	THR	ASP	3.22316	3.71223
6P2L	1.08	A	549	N/A	N/A	N/A	-116.117	82.8653	-177.766	-170.384	-66.905	145.685	-174.245	-59.2515	146.605	177.558	Beta	Beta	Beta	98.8297	3.84311	2.94782	ALA	PRO	2.94782	3.84311
6P2L	1.08	A	171	SHEET	SHEET	SHEET	-138.048	112.251	164.768	-163.725	-74.5669	146.507	-175.625	-121.007	148.611	178.152	Beta	Beta	Beta	102.267	4.05433	3.2178	PHE	GLY	3.2178	4.05433
6P2L	1.08	A	205	SHEET	SHEET	SHEET	-114.792	-4.51233	165.647	59.2429	-149.348	150.459	173.302	-88.2552	117.084	-166.723	N/A	Beta	Beta	115.784	3.78136	4.16532	ILE	PHE	4.16532	3.78136
6P2L	1.08	A	62	SHEET	SHEET	SHEET	-139.074	158.52	174.092	69.7534	-121.2	154.879	-178.835	-131.96	161.839	167.116	Beta	Beta	Beta	111.573	4.06821	3.89528	TYR	ARG	3.89528	4.06821
6P2L	1.08	A	520	SHEET	N/A	SHEET	-121.401	109.968	-179.916	178.253	-56.2993	148.017	179.104	-150.173	133.033	173.847	Beta	Beta	Beta	93.0455	3.88036	2.81944	TYR	PRO	2.81944	3.88036
6Q00	0.85	B	45	SHEET	HELIX	SHEET	-73.9988	-35.4336	170.02	-65.5117	-57.6016	-43.8417	178.836	-65.3698	-38.1922	-178.394	Alpha-R	Alpha-R	Alpha-R	100.433	3.14339	2.85738	GLN	PHE	2.85738	3.14339
6Q00	0.85	B	38	HELIX	HELIX	HELIX	-130.604	169.982	178.525	71.2583	-79.1691	77.0411	135.983	45.084	58.6876	-177.056	Beta	Beta	Alpha-L	101.219	3.98212	3.02936	SER	ASP	3.02936	3.98212
6Q4G	0.98	A	118	HELIX	HELIX	HELIX	-58.7501	-42.3627	-177.883	-82.6049	-69.3334	-38.5366	179.152	-60.3627	-53.5674	-177.565	Alpha-R	Alpha-R	Alpha-R	106.909	2.96109	3.12472	PHE	HIS	3.12472	2.96109
6Q4G	0.98	A	191	HELIX	HELIX	HELIX	-61.1396	-39.7876	179.773	-67.3441	-67.8185	-42.4357	173.666	-60.5317	-43.2863	176.894	Alpha-R	Alpha-R	Alpha-R	103.036	2.90922	3.07112	GLY	ILE	3.07112	2.90922
6Q4G	0.98	A	177	N/A	N/A	N/A	-65.7053	132.241	177.177	-64.0892	-101.885	14.6452	177.717	88.706	11.1117	172.465	Beta	Alpha-R	Alpha-L	148.432	2.93926	3.53163	GLY	LYS	3.53163	2.93926
6Q6T	0.94	A	39	HELIX	HELIX	HELIX	-59.774	-45.7352	-179.206	-75.6239	-63.502	-36.8817	-176.488	-60.2321	-39.5095	176.305	Alpha-R	Alpha-R	Alpha-R	105.976	2.92617	2.95066	PRO	LYS	2.95066	2.92617
6Q7D	0.98	A	842	N/A	HELIX	N/A	-97.5711	129.596	173.589	-171.617	-55.1252	137.636	177.118	61.4164	28.2695	-170.562	Beta	Beta	Alpha-L	99.1511	3.44667	2.83212	ASP	PRO	2.83212	3.44667
6Q7D	0.98	A	753	SHEET	SHEET	N/A	-91.2339	134.363	-178.908	-68.3185	-120.131	114.661	175.61	-81.243	129.17	179.273	Beta	Beta	Beta	133.238	3.46797	3.90039	VAL	LYS	3.90039	3.46797
6Q7D	0.98	A	853	HELIX	HELIX	HELIX	-65.2105	-23.6997	-176.508	-67.7358	-100.582	-55.0796	146.092	-67.2463	-31.5244	176.455	Alpha-R	Alpha-R	Alpha-R	151.432	3.04698	3.63979	GLN	TRP	3.63979	3.04698
6Q7D	0.98	A	612	N/A	SHEET	HELIX	-90.7909	-0.507337	-171.811	-62.7766	-119.317	133.357	172.931	-63.2626	-15.2931	179.648	Alpha-R	Beta	Alpha-R	122.223	3.4754	3.81196	SER	VAL	3.81196	3.4754
6QAZ	1.02	A	83	SHEET	SHEET	N/A	-114.242	141.617	168.004	-65.8965	-106.253	167.209	174.465	-79.6622	163.388	-178.485	Beta	Beta	Beta	102.049	3.81683	3.79405	MET	LEU	3.79405	3.81683
6QAZ	1.02	A	59	SHEET	SHEET	SHEET	-151.139	172.925	174.365	63.5845	-85.423	171.159	-173.373	-115.639	128.524	-174.095	Beta	Beta	Beta	91.8968	4.13361	3.36406	ILE	SER	3.36406	4.13361
6R1D	1.1	B	60	SHEET	SHEET	SHEET	-91.422	135.687	179.812	-61.374	-130.156	141.788	177.201	-113.436	133.73	179.931	Beta	Beta	Beta	120.093	3.43247	4.00899	TRP	PHE	4.00899	3.43247
6R1D	1.1	B	93	N/A	N/A	N/A	-109.106	-9.25346	178.391	74.821	83.7201	-6.52712	-178.37	-91.5085	-53.2425	-170.281	Alpha-R	Alpha-L	Alpha-R	135.759	3.69916	3.31799	GLN	GLY	3.31799	3.69916
6R1D	1.1	B	27	N/A	N/A	N/A	-124.336	-12.1605	-178.701	77.2821	88.3752	-1.10875	176.458	-75.1322	-38.8803	-173.725	N/A	Alpha-L	Alpha-R	135.684	3.8155	3.41017	GLN	GLY	3.41017	3.8155
6R1D	1.1	B	24	SHEET	N/A	SHEET	-55.8222	126.052	-177.971	176.173	-65.5066	-31.5293	-179.336	-117.542	154.122	168.072	Beta	Alpha-R	Beta	107.504	2.84429	2.94852	ARG	ARG	2.94852	2.84429
6R1D	1.1	A	90	SHEET	N/A	SHEET	-55.8578	128.928	178.962	178.86	-71.4467	-13.8379	178.131	-108.408	151.747	164.674	Beta	Alpha-R	Beta	122.493	2.90776	3.09408	LEU	GLY	3.09408	2.90776
6R4Z	1.05	A	208	HELIX	HELIX	HELIX	-135.659	67.3136	-173.032	-54.5257	-63.317	-35.8439	178.451	-81.5006	-36.1046	-168.918	Beta	Alpha-R	Alpha-R	108.24	4.04223	2.91244	ALA	PRO	2.91244	4.04223
6RI6	0.93	A	453	SHEET	N/A	SHEET	-68.0409	136.59	-179.103	-178.21	-92.2712	7.23538	162.178	-159.105	160.304	166.488	Beta	Alpha-R	Beta	136.714	3.07827	3.48794	HIS	HIS	3.48794	3.07827
6RK0	0.99	A	47	SHEET	SHEET	SHEET	-156.759	131.092	176.804	-171.882	-75.8245	116.805	-179.222	-98.2579	132.268	-177.027	Beta	Beta	Beta	123.04	4.16117	3.19292	GLY	MET	3.19292	4.16117
6RK0	0.99	A	107	SHEET	SHEET	SHEET	-134.773	147.443	161.699	-50.8416	-88.6191	143.299	-170.503	-163.979	-169.717	174.633	Beta	Beta	Beta	111.217	4.07639	3.51493	ASN	ASN	3.51493	4.07639
6RK0	0.99	A	169	SHEET	SHEET	SHEET	-119.698	153.487	163.396	-45.6878	-130.695	139.254	-179.973	-123.495	141.006	170.885	Beta	Beta	Beta	118.652	3.90502	4.05348	SER	LYS	4.05348	3.90502
6RK0	0.99	B	87	SHEET	SHEET	SHEET	-123.454	125.876	174.53	177.366	-111.534	114.773	-177.934	-115.179	172.158	171.616	Beta	Beta	Beta	132.35	3.96738	3.76059	ILE	LEU	3.76059	3.96738
6RVU	0.99	A	94	N/A	SHEET	N/A	-66.3827	164.483	172.816	-52.8626	-113.995	148.952	169.763	85.6132	-5.13801	177.771	Beta	Beta	Alpha-L	114.331	3.06544	3.87706	GLY	LYS	3.87706	3.06544
6RY0	1.05	A	207	HELIX	HELIX	HELIX	-62.6892	-45.9831	-179.736	-70.1647	-64.0063	-41.5511	174.924	-63.6318	-40.335	177.446	Alpha-R	Alpha-R	Alpha-R	101.224	2.94839	2.98389	ALA	PHE	2.98389	2.94839
6RZ0	1.1	A	116	SHEET	SHEET	SHEET	-121.161	154.385	179.996	-61.2726	-120.082	137.065	-176.271	-130.069	158.67	172.837	Beta	Beta	Beta	121.213	3.94287	3.87278	ILE	TYR	3.87278	3.94287
6RZ0	1.1	A	162	SHEET	SHEET	SHEET	-109.408	76.4944	-179.97	-59.7509	-87.9693	170.324	-163.77	-82.2676	106.365	-177.194	Beta	Beta	Beta	91.7329	3.73489	3.38389	VAL	CYS	3.38389	3.73489
6RZ0	1.1	A	125	SHEET	SHEET	SHEET	-109.256	13.9258	170.049	50.6554	53.1026	-121.525	-179.83	-96.2342	97.3876	-172.191	Alpha-R	PPII-R	Beta	104.944	3.71216	2.80974	PHE	GLY	2.80974	3.71216
6RZ0	1.1	A	163	SHEET	N/A	SHEET	-87.9693	170.324	-163.77	56.2822	-91.5924	-14.2149	-172.48	-109.408	76.4944	-179.97	Beta	Alpha-R	Beta	123.113	3.38389	3.34794	CYS	ALA	3.34794	3.38389
6RZ0	1.1	A	24	SHEET	SHEET	SHEET	-142.732	152.057	175.639	72.5735	-116.392	129.006	-174.334	-61.3198	147.061	-173.632	Beta	Beta	Beta	122	3.99162	3.93366	ARG	LEU	3.93366	3.99162
6RZ0	1.1	A	134	SHEET	N/A	SHEET	-157.404	166.737	-178.608	72.8763	-65.3599	146.552	166.456	-156.19	-160.268	179.445	Beta	Beta	Beta	96.5479	4.20563	2.97878	GLY	GLY	2.97878	4.20563
6S07	1.04	A	269	N/A	N/A	N/A	-71.5309	146.702	-177.636	-67.7345	-152.522	147.421	-176.267	-93.1342	-14.297	-172.532	Beta	Beta	Alpha-R	117.969	3.02877	4.15759	LEU	HIS	4.15759	3.02877
6S07	1.04	A	231	SHEET	SHEET	SHEET	-116.374	169.698	-173.389	-67.0089	-72.001	-29.9389	-164.003	-63.7985	137.657	170.127	Beta	Alpha-R	Beta	112.328	3.8809	3.08441	TRP	ALA	3.08441	3.8809
6S07	1.04	A	298	N/A	SHEET	N/A	-101.699	157.454	169.202	-63.547	-120.934	170.757	178.936	-127.824	157.574	-176.449	Beta	Beta	Beta	103.414	3.56927	3.99387	ARG	ALA	3.99387	3.56927
6S07	1.04	C	7	N/A	N/A	N/A	-107.979	-19.9987	-177.439	-63.5243	-113.574	99.8786	-178.972	-114.534	119.531	172.505	Alpha-R	Beta	Beta	144.554	3.80501	3.74702	LEU	GLY	3.74702	3.80501
6S07	1.04	A	274	N/A	N/A	N/A	-91.6763	-30.2864	-176.228	60.5692	54.2277	34.2504	-170.538	-114.443	-85.8262	-172.181	Alpha-R	Alpha-L	N/A	112.756	3.40137	2.8437	TYR	ASN	2.8437	3.40137
6S07	1.04	A	284	SHEET	SHEET	SHEET	-154.546	169.14	170.866	62.3286	-155.412	155.167	-179.973	-148.964	-159.156	-173.955	Beta	Beta	Beta	112.462	4.13435	4.20878	THR	ASN	4.20878	4.13435
6S07	1.04	A	187	N/A	N/A	N/A	-161.334	163.795	-178.197	68.1584	-102.809	99.0246	175.479	-116.938	-4.57231	-177.696	Beta	Beta	N/A	143.719	4.21814	3.66159	ARG	ASN	3.66159	4.21814
6S6C	1.07	A	154	HELIX	HELIX	HELIX	-54.4622	-46.2392	179.696	-67.6905	-58.8933	-46.1638	-178.002	-63.3258	-43.8464	174.81	Alpha-R	Alpha-R	Alpha-R	99.6365	2.87838	2.86723	ILE	MET	2.86723	2.87838
6T02	1.1	A	489	HELIX	HELIX	HELIX	-62.4879	-36.5836	179.886	-72.9624	-71.8555	-15.8207	176.595	-62.2731	-46.8978	-179.717	Alpha-R	Alpha-R	Alpha-R	121.745	2.91192	3.12274	LEU	LEU	3.12274	2.91192
6T02	1.1	A	449	SHEET	N/A	SHEET	-150.524	123.48	176.419	175.583	-102.859	9.41144	179.844	-104.83	-32.3039	179.176	Beta	Alpha-R	Alpha-R	139.488	4.13372	3.70008	ILE	ARG	3.70008	4.13372
6T02	1.1	B	484	HELIX	HELIX	HELIX	-60.8184	-45.5829	179.661	179.29	-64.4996	-38.8478	177.81	-67.5523	-42.2673	177.495	Alpha-R	Alpha-R	Alpha-R	104.601	2.92464	2.97248	GLU	GLY	2.97248	2.92464
6T85	1.1	A	376	SHEET	N/A	SHEET	-126.161	161.549	177.072	-62.0746	-57.7627	131.787	174.104	-117.985	86.9465	-176.992	Beta	Beta	Beta	108.441	3.98083	2.8994	ILE	SER	2.8994	3.98083
6TCC	1.05	A	71	N/A	HELIX	N/A	-119.358	166.249	169.355	-67.4253	-129.349	-172.356	-179.392	85.9446	19.8688	-175.072	Beta	Beta	Alpha-L	101.761	3.88758	3.98963	GLY	GLY	3.98963	3.88758
6TGU	0.83	A	221	HELIX	HELIX	HELIX	-60.3529	-41.6858	177.621	-69.5735	-65.0309	-44.2942	178.904	-56.1642	-41.5188	178.001	Alpha-R	Alpha-R	Alpha-R	98.9885	2.91063	3.0147	GLY	MET	3.0147	2.91063
6TGU	0.83	A	148	HELIX	HELIX	HELIX	-64.971	-38.8581	176.985	71.8967	-61.0179	-41.7154	179.369	-62.9505	-52.5417	-176.646	Alpha-R	Alpha-R	Alpha-R	100.786	2.87909	2.88392	TYR	HIS	2.88392	2.87909
6THO	1.09	A	47	HELIX	HELIX	HELIX	-53.322	-40.0441	-179.261	59.4045	-67.7832	-37.3032	-179.869	-100.023	18.4606	-178.807	Alpha-R	Alpha-R	Alpha-R	106.624	2.77079	3.00308	TYR	GLY	3.00308	2.77079
6TM3	1.08	A	263	HELIX	HELIX	HELIX	-66.8402	-39.4896	177.176	-71.0558	-57.7945	-47.652	-179.101	-64.8875	-37.4167	178.944	Alpha-R	Alpha-R	Alpha-R	97.5328	3.01829	2.82868	ALA	ILE	2.82868	3.01829
6TM3	1.08	A	150	SHEET	SHEET	SHEET	-112.804	152.006	170.22	-54.7394	-156.463	174.823	-175.265	-101.848	118.261	-171.072	Beta	Beta	Beta	109.91	3.72887	4.20541	LEU	GLY	4.20541	3.72887
6TM3	1.08	A	92	SHEET	SHEET	SHEET	-144.275	152.261	-178.322	59.8469	-139.003	142.245	172.011	-69.6604	151.771	-176.913	Beta	Beta	Beta	117.927	4.08762	4.08556	SER	MET	4.08556	4.08762
6TM9	1.07	A	221	HELIX	HELIX	SHEET	-72.9927	-8.68716	171.751	-57.4912	-70.3124	-13.6707	-179.946	57.0882	-155.258	-169.841	Alpha-R	Alpha-R	PPII-R	124.734	3.06517	3.2516	GLY	ALA	3.2516	3.06517
6U66	0.99	A	152	N/A	N/A	SHEET	-71.7531	121.528	175.065	178.456	-109.707	-12.4097	-176.556	-112.588	120.036	176.217	Beta	Alpha-R	Beta	126.186	3.11207	3.85703	HIS	ASN	3.85703	3.11207
6UKF	1	X	54	SHEET	SHEET	SHEET	-150.836	47.1907	175.463	-149.116	111.679	161.056	-175.979	-104.757	163.983	-164.046	N/A	N/A	Beta	88.9429	4.11048	3.69667	GLN	GLY	3.69667	4.11048
6UKF	1	X	10	HELIX	HELIX	HELIX	-68.6189	-45.0333	-178.349	-71.4848	-64.1933	-42.2603	178.75	-54.1976	-44.1116	-179.488	Alpha-R	Alpha-R	Alpha-R	101.472	3.03714	2.94522	PHE	VAL	2.94522	3.03714
6UKF	1	X	152	SHEET	SHEET	SHEET	-142.272	131.7	-179.428	176.828	-133.586	156.159	172.199	-134.15	167.714	-171.849	Beta	Beta	Beta	113.051	4.05857	4.04099	SER	THR	4.04099	4.05857
6UWW	0.92	A	124	SHEET	SHEET	SHEET	-131.426	132.116	174.859	-60.0522	-114.877	112.459	-168.585	-145.529	142.086	167.694	Beta	Beta	Beta	133.142	4.08639	3.81873	ARG	GLU	3.81873	4.08639
6WFN	1.07	A	79	SHEET	N/A	SHEET	-131.507	142.406	173.274	-65.9457	-59.7103	140.272	-175.666	-166.839	165.672	-179.657	Beta	Beta	Beta	97.2351	4.05627	2.87489	GLY	LEU	2.87489	4.05627
6WFN	1.07	A	100	HELIX	HELIX	HELIX	-61.628	-37.3429	-179.825	-63.4431	-64.1774	-47.7127	-179.557	-60.7214	-47.0483	-179.049	Alpha-R	Alpha-R	Alpha-R	98.2986	2.86838	3.08719	ILE	GLU	3.08719	2.86838
6WFN	1.07	A	60	SHEET	SHEET	SHEET	-132.642	120.148	-178.268	-61.7238	-130.179	168.728	171.783	-132.101	134.075	178.873	Beta	Beta	Beta	109.218	4.02838	4.0077	VAL	CYS	4.0077	4.02838
6WFN	1.07	A	61	SHEET	SHEET	SHEET	-130.179	168.728	171.783	-45.3595	-146.571	159.06	173.481	-132.642	120.148	-178.268	Beta	Beta	Beta	112.775	4.0077	4.14316	CYS	ARG	4.14316	4.0077
6WQY	1.05	A	312	N/A	N/A	N/A	-163.711	135.183	-176.144	-173.142	-75.5672	156.494	179.343	150.85	-172.662	-177.79	Beta	Beta	N/A	94.4819	4.22701	3.16488	GLY	VAL	3.16488	4.22701
6WQY	1.05	A	332	HELIX	HELIX	HELIX	-66.8356	-40.0286	177.243	-73.8093	-64.9757	-39.916	176.792	-68.6478	-40.3927	179.645	Alpha-R	Alpha-R	Alpha-R	95.8406	2.98622	2.99023	VAL	LYS	2.99023	2.98622
6Y14	0.9	B	7	HELIX	HELIX	HELIX	-61.6726	-46.6624	179.346	-175.289	-55.8781	-47.7823	-178.407	-60.3767	-39.7047	179.06	Alpha-R	Alpha-R	Alpha-R	99.3205	2.89926	2.81538	LYS	LEU	2.81538	2.89926
6Y14	0.9	B	10	HELIX	HELIX	HELIX	-68.2498	-40.0179	179.018	174.921	-70.8218	-41.8507	-171.599	-63.0847	-39.6828	-178.245	Alpha-R	Alpha-R	Alpha-R	104.942	3.07909	3.16713	LYS	LEU	3.16713	3.07909
6Y1S	1.04	A	7	HELIX	HELIX	HELIX	-45.6708	-68.4504	174.032	-152.826	-38.2293	-53.2108	175.36	-65.4529	-49.0309	174.625	Alpha-R	Alpha-R	Alpha-R	97.1774	2.93028	2.86057	DAB	ILE	2.86057	2.93028
6Y1S	1.04	A	10	HELIX	HELIX	HELIX	-61.6655	-43.5342	177.607	-68.8951	-84.3995	-11.7931	177.209	-46.2641	-47.3512	-170.386	Alpha-R	Alpha-R	Alpha-R	116.156	2.919	3.22694	ARG	TYR	3.22694	2.919
6YK4	1	A	36	HELIX	HELIX	HELIX	-72.6653	-28.1737	173.501	-75.1418	-63.4401	-46.5097	177.907	-56.2592	-50.0735	-176.646	Alpha-R	Alpha-R	Alpha-R	97.1839	3.11013	3.02302	TYR	VAL	3.02302	3.11013
6YK4	1	A	47	HELIX	HELIX	HELIX	-87.7795	-16.2902	179.151	-63.2516	75.3793	40.1623	174.304	-66.8107	-39.5774	-174.904	Alpha-R	Alpha-L	Alpha-R	105.256	3.38467	3.22793	HIS	GLY	3.22793	3.38467
6YP6	0.97	A	497	SHEET	SHEET	SHEET	-152.312	139.053	169.324	177.368	-113.604	128.036	-168.269	-140.663	153.762	174.811	Beta	Beta	Beta	124.039	4.19558	3.84579	ARG	ARG	3.84579	4.19558
6ZEG	1.09	A	245	SHEET	SHEET	SHEET	-117.857	118.742	-173.667	-176.963	-142.032	-179.805	-171.998	-98.9672	127.432	176.862	Beta	Beta	Beta	103.278	3.86916	4.1028	ILE	ARG	4.1028	3.86916
6ZEG	1.09	B	140	HELIX	HELIX	HELIX	-59.0089	-44.3373	-177.922	-75.911	-61.6756	-41.1098	-166.168	-65.4844	-44.4014	178.533	Alpha-R	Alpha-R	Alpha-R	100.369	2.89556	2.89468	GLU	LYS	2.89468	2.89556
6ZEG	1.09	A	105	HELIX	HELIX	HELIX	-63.2317	-42.6083	178.384	-72.9684	-64.5117	-41.7202	179.871	-67.2667	-35.3759	179.78	Alpha-R	Alpha-R	Alpha-R	99.7014	2.90971	2.96866	ILE	LEU	2.96866	2.90971
6ZEG	1.09	B	39	HELIX	HELIX	HELIX	-61.0721	-49.4482	-170.949	-72.1142	-74.8347	-37.248	178.278	-60.3736	-45.0714	179.58	Alpha-R	Alpha-R	Alpha-R	105.2	2.93822	3.09991	LEU	LEU	3.09991	2.93822
6ZEG	1.09	A	291	SHEET	SHEET	SHEET	-106.292	131.498	-179.716	-63.5114	-136.928	162.697	-174.199	-81.6816	126.416	-179.011	Beta	Beta	Beta	110.744	3.72293	4.01973	MET	SER	4.01973	3.72293
6ZEG	1.09	B	158	N/A	N/A	HELIX	-108.121	2.24391	179.344	-62.0377	-64.22	146.91	169.692	-64.8888	-11.147	178.701	Alpha-R	Beta	Alpha-R	98.2661	3.78117	2.93756	ASN	LEU	2.93756	3.78117
6ZEG	1.09	B	62	SHEET	N/A	SHEET	-126.03	144.727	174.683	-58.2131	-95.9559	-151.614	-163.245	-108.689	129.703	-175.179	Beta	Beta	Beta	79.3	3.96241	3.625	ILE	GLY	3.625	3.96241
6ZEG	1.09	A	171	SHEET	N/A	SHEET	-119.988	135.587	174.148	-55.5076	-160.094	168.948	-176.452	-92.0287	123.481	-174.767	Beta	Beta	Beta	109.454	3.89587	4.21969	PHE	CYS	4.21969	3.89587
6ZEG	1.09	B	127	HELIX	HELIX	N/A	-148.852	136.765	-173.483	-54.9715	-57.926	-43.5943	-174.587	-90.6318	53.911	-174.691	Beta	Alpha-R	N/A	104.742	4.17013	2.86298	GLU	ALA	2.86298	4.17013
6ZEG	1.09	B	172	N/A	N/A	SHEET	-158.714	169.901	-176.152	64.467	-71.9891	-52.4539	-171.564	-120.152	133.041	172.518	Beta	Alpha-R	Beta	94.8701	4.21239	3.02261	CYS	HIS	3.02261	4.21239
6ZEG	1.09	A	273	HELIX	HELIX	HELIX	41.5531	33.6001	174.228	66.5131	66.3669	14.8463	-176.155	-51.614	125.529	-177.628	Alpha-L	Alpha-L	Beta	124.498	2.94313	3.06163	TYR	GLY	3.06163	2.94313
6ZEG	1.09	B	202	HELIX	HELIX	HELIX	-57.2811	-53.3996	-173.376	173.832	-62.3313	-40.3317	179.57	-65.9204	-37.0579	171.996	Alpha-R	Alpha-R	Alpha-R	106.071	2.91491	2.90096	LEU	ASP	2.90096	2.91491
6ZEG	1.09	A	155	HELIX	HELIX	HELIX	-65.672	-50.2291	179.045	176.476	-58.1857	-36.4961	179.691	-60.4672	-39.4471	176.998	Alpha-R	Alpha-R	Alpha-R	108.746	3.0544	2.91567	ASP	PHE	2.91567	3.0544
6ZM8	0.78	A	155	N/A	N/A	N/A	-107.154	116.173	175.002	-62.7701	-59.6227	146.373	-178.11	-119.853	-43.7131	-164.456	Beta	Beta	N/A	96.1418	3.63651	2.86022	ARG	PRO	2.86022	3.63651
6ZPA	0.86	A	60	HELIX	HELIX	HELIX	-64.0618	-42.853	178.852	-76.262	-60.1788	-44.2079	179.131	-60.5299	-44.5863	-179.269	Alpha-R	Alpha-R	Alpha-R	100.316	2.99569	2.90031	ALA	GLU	2.90031	2.99569
6ZPA	0.86	A	42	HELIX	HELIX	HELIX	-58.686	-46.1364	-178.723	-72.3298	-60.3617	-53.3724	-171.922	-61.7276	-44.0502	178.218	Alpha-R	Alpha-R	Alpha-R	94.7421	2.83522	2.92432	LEU	ARG	2.92432	2.83522
6ZPA	0.86	A	118	HELIX	HELIX	HELIX	-68.7827	-36.2872	178.272	-68.7754	-61.4215	-44.0072	178.845	-56.4659	-48.5623	-176.502	Alpha-R	Alpha-R	Alpha-R	100.493	3.06684	2.95352	PHE	ASP	2.95352	3.06684
7A5M	0.78	A	7	SHEET	SHEET	SHEET	-166.947	142.173	170.243	-162.973	-133.296	151.137	177.54	-113.561	-7.11169	179.261	Beta	Beta	N/A	123.085	4.29909	4.06688	ILE	GLN	4.06688	4.29909
7A5M	0.78	A	62	SHEET	SHEET	SHEET	-142.578	157.715	179.66	65.7813	-74.3252	60.3634	142.19	-154.687	94.8835	-173.221	Beta	Beta	Beta	111.205	4.03011	3.0966	ASN	ALA	3.0966	4.03011
7ADR	1	D	168	HELIX	HELIX	HELIX	-163.703	78.3432	171.783	-175.694	-54.8332	158.657	-174.909	-101.412	102.026	179.586	Beta	Beta	Beta	86.4603	3.81821	3.12932	GLU	PRO	3.12932	3.81821
7ADR	1	B	165	SHEET	SHEET	SHEET	-67.6274	-46.8639	177.533	-175.479	-53.645	-48.5431	-176.725	-64.7068	-41.0464	-178.491	Alpha-R	Alpha-R	Alpha-R	95.7969	2.99637	2.82302	GLU	VAL	2.82302	2.99637
7ADR	1	D	257	HELIX	HELIX	N/A	-83.6548	90.457	179.525	-168.337	-70.4604	-17.9502	179.189	-102.958	-65.171	-179.685	Beta	Alpha-R	Alpha-R	121.211	3.22787	3.10696	ASN	ALA	3.10696	3.22787
7ADR	1	B	345	HELIX	HELIX	HELIX	-54.4223	-39.0173	-171.822	-79.8448	-71.0996	-35.9358	-179.292	-56.0761	-47.3213	-177.889	Alpha-R	Alpha-R	Alpha-R	118.734	2.74183	2.92512	PHE	MET	2.92512	2.74183
7ADR	1	E	131	SHEET	SHEET	HELIX	-64.6862	-39.9101	179.534	-70.6027	-61.9682	-5.94926	-161.024	-58.3387	-50.1074	-178.36	Alpha-R	Alpha-R	Alpha-R	98.694	3.01043	2.87713	VAL	ASN	2.87713	3.01043
7ADR	1	D	295	HELIX	HELIX	HELIX	-68.2299	-34.7926	176.431	-70.1059	-65.7957	-39.31	176.793	-56.8995	-48.1547	-174.896	Alpha-R	Alpha-R	Alpha-R	101.72	3.0086	3.05022	ILE	ALA	3.05022	3.0086
7ADR	1	A	138	HELIX	HELIX	HELIX	-42.5268	-58.3711	-167.223	-66.0498	-79.5055	-27.8572	177.288	-132.972	177.449	-176.212	Alpha-R	Alpha-R	Beta	111.476	2.61419	3.09454	THR	PRO	3.09454	2.61419
7ADR	1	D	246	HELIX	HELIX	HELIX	-101.663	5.38372	-167.218	-59.4869	-60.0382	-27.2182	-179.319	-72.2095	-14.479	-171.143	Alpha-R	Alpha-R	Alpha-R	118.118	3.6788	2.90006	ARG	MET	2.90006	3.6788
7ADR	1	B	56	HELIX	HELIX	HELIX	-61.7568	-26.4989	172.753	-57.0183	-88.9953	-57.9437	-164.856	-65.48	-30.7618	-178.417	Alpha-R	Alpha-R	Alpha-R	97.2368	2.92417	3.57574	GLY	THR	3.57574	2.92417
7ADR	1	D	75	SHEET	SHEET	HELIX	-62.4872	-34.0451	176.531	-56.2164	-71.6793	-53.5208	179.91	-68.0824	-35.328	-178.296	Alpha-R	Alpha-R	Alpha-R	95.8282	2.86698	3.19773	GLY	ALA	3.19773	2.86698
7ADR	1	C	17	SHEET	SHEET	SHEET	-88.7136	155.382	179.126	-54.2177	-115.154	-19.1874	-171.367	-109.083	-46.4346	-163.71	Beta	N/A	Alpha-R	120.909	3.38324	3.90287	ARG	LEU	3.90287	3.38324
7ADR	1	E	115	HELIX	HELIX	HELIX	-51.6914	-47.7354	-173.778	55.243	-59.2161	-47.7108	-169.03	-129.208	177.672	170.951	Alpha-R	Alpha-R	Beta	98.8635	2.75334	2.8489	THR	SER	2.8489	2.75334
7ADR	1	E	31	HELIX	HELIX	HELIX	-85.0837	169.1	-174.591	57.9993	-52.3602	-46.9479	-175.943	-84.702	-177.581	-179.392	Beta	Alpha-R	Beta	103	3.36828	2.78178	ASP	GLN	2.78178	3.36828
7ADR	1	A	8	HELIX	HELIX	HELIX	-70.1695	-6.23086	179.404	62.8413	-111.382	15.3182	179.482	-60.7549	-39.1126	179.001	Alpha-R	N/A	Alpha-R	137.443	3.08903	3.75544	GLU	ASP	3.75544	3.08903
7ADR	1	A	49	SHEET	SHEET	N/A	-110.902	169.745	-176.698	71.2587	-65.4612	-36.5798	178.616	-105.853	-162.4	-174.173	Beta	Alpha-R	Beta	106.138	3.74612	2.94281	GLY	ALA	2.94281	3.74612
7ADR	1	B	46	N/A	N/A	N/A	-122.362	132.942	166.704	179.33	-128.149	108.633	174.178	60.4152	40.8685	177.109	Beta	Beta	Alpha-L	131.258	3.9352	4.06386	ASP	ILE	4.06386	3.9352
7ADR	1	A	52	HELIX	HELIX	SHEET	-53.2981	-48.4293	-176.313	179.801	-61.8174	-33.6324	177.398	-59.4339	-42.5764	177.29	Alpha-R	Alpha-R	Alpha-R	109.083	2.80746	2.95597	PHE	GLY	2.95597	2.80746
7AOT	0.85	A	107	SHEET	N/A	SHEET	-135.046	128.014	-179.082	59.3343	-75.1384	170.009	-170.269	-112.121	132.514	-178.041	Beta	Beta	Beta	87.3471	3.97234	3.17444	LEU	LYS	3.17444	3.97234
7AOT	0.85	A	103	SHEET	SHEET	SHEET	-130.474	161.302	166.435	78.1746	-99.9062	134.97	-176.413	-116.775	133.828	174.275	Beta	Beta	Beta	118.191	4.01341	3.74746	ILE	HIS	3.74746	4.01341
7ASQ	0.95	A	365	SHEET	SHEET	SHEET	-137.08	147.398	173.407	-169.132	-113.246	138.294	175.513	-125.959	166.553	-177.127	Beta	Beta	Beta	117.954	4.06815	3.84276	GLY	LEU	3.84276	4.06815
7ASQ	0.95	A	278	N/A	SHEET	HELIX	-92.5982	-12.3614	-169.005	68.3774	-164.062	-88.7195	-142.943	-122.11	151.183	169.919	Alpha-R	N/A	Beta	115.427	3.53027	4.19317	ILE	MET	4.19317	3.53027
7ASQ	0.95	A	255	SHEET	SHEET	SHEET	-106.608	118.007	174.833	176.492	-76.4981	127.597	171.505	-105.492	127.929	169.345	Beta	Beta	Beta	118.645	3.78463	3.2109	LEU	LEU	3.2109	3.78463
7B1S	0.99	A	479	HELIX	HELIX	HELIX	-79.4425	-50.2481	-172.578	-172.875	-64.5186	-41.7758	-175.551	-63.0057	-34.5131	176.796	Alpha-R	Alpha-R	Alpha-R	103.572	3.30694	2.93954	LEU	LYS	2.93954	3.30694
7B1S	0.99	B	182	HELIX	HELIX	SHEET	-62.1636	-38.3324	-179.775	-172.408	-56.2083	-34.2662	179.337	-54.6557	-47.3727	-178.32	Alpha-R	Alpha-R	Alpha-R	109.912	2.92126	2.84338	HIS	ALA	2.84338	2.92126
7B1S	0.99	C	178	SHEET	SHEET	HELIX	-95.6966	104.662	179.939	-159.425	-111.055	94.2861	153.315	-66.1641	-51.746	-174.514	Beta	Beta	Alpha-R	75.1233	3.71058	4.8715	ARG	ILE	4.8715	3.71058
7B1S	0.99	C	137	SHEET	SHEET	SHEET	-64.7614	-21.9125	172.794	-75.8924	-59.1542	-42.3451	176.223	-62.3425	-38.1557	-177.572	Alpha-R	Alpha-R	Alpha-R	99.1632	3.00917	2.85865	ALA	ARG	2.85865	3.00917
7B1S	0.99	A	271	HELIX	HELIX	HELIX	-83.6569	-33.2416	177.655	-68.9552	-75.3561	-26.0752	-174.869	-57.6226	-40.8234	-171.132	Alpha-R	Alpha-R	Alpha-R	113.259	3.27167	3.15766	LEU	ALA	3.15766	3.27167
7B1S	0.99	E	267	HELIX	HELIX	HELIX	-79.9123	-44.5891	179.943	-66.6632	-81.8369	-36.5491	-169.309	-64.3748	-46.2241	-172.105	Alpha-R	Alpha-R	Alpha-R	105.966	3.19003	3.24087	ALA	GLN	3.24087	3.19003
7B1S	0.99	E	331	HELIX	HELIX	HELIX	-63.5367	-41.9594	175.315	-66.6032	-62.4522	-44.5945	176.28	-62.0309	-39.9952	177.833	Alpha-R	Alpha-R	Alpha-R	99.966	2.95588	3.01969	VAL	ALA	3.01969	2.95588
7B1S	0.99	C	163	HELIX	HELIX	HELIX	-79.4213	156.303	174.24	-66.332	-60.0976	147.309	176.714	-105.628	1.94886	179.236	Beta	Beta	Alpha-R	92.2375	3.21726	2.90925	SER	ARG	2.90925	3.21726
7B1S	0.99	F	86	SHEET	SHEET	SHEET	-114.589	155.71	-176.311	-65.1028	-112.356	137.128	164.588	-90.4161	118.963	-174.368	Beta	Beta	Beta	121.211	3.78931	3.76691	VAL	THR	3.76691	3.78931
7B1S	0.99	C	158	HELIX	HELIX	HELIX	-98.733	-1.25961	-178.508	-58.9868	-51.0884	138.724	176.782	49.8551	62.4345	-162.404	Alpha-R	Beta	Alpha-L	89.9527	3.53601	2.77672	THR	THR	2.77672	3.53601
7B1S	0.99	B	287	HELIX	HELIX	HELIX	-121.648	175.297	173.766	-57.078	-47.0273	-44.5121	-175.605	-116.839	-141.793	-168.933	Beta	Alpha-R	Beta	103.188	3.89695	2.72455	GLY	THR	2.72455	3.89695
7B1S	0.99	E	207	HELIX	HELIX	HELIX	-87.6226	-8.12285	-158.064	56.0001	-102.269	3.18668	-178.776	-78.3877	6.87233	168.689	Alpha-R	Alpha-R	Alpha-R	132.093	3.52785	3.54422	SER	ALA	3.54422	3.52785
7B1S	0.99	D	403	N/A	N/A	HELIX	-152.207	176.183	177.922	64.287	-93.2234	-176.32	175.531	51.6371	54.9959	-177.601	Beta	Beta	Alpha-L	88.3789	4.12051	3.50851	LYS	GLY	3.50851	4.12051
7B1S	0.99	D	199	SHEET	SHEET	SHEET	-143.811	165.789	171.523	64.7881	-143.155	161.051	-177.722	-135.729	177.953	174.91	Beta	Beta	Beta	112.294	4.1067	4.12585	LYS	PHE	4.12585	4.1067
7B1S	0.99	D	323	HELIX	HELIX	HELIX	-68.5828	-35.7423	174.247	76.7359	-55.6027	144.229	-173.009	-84.3585	-21.4808	173.312	Alpha-R	Beta	Alpha-R	97.1851	3.0176	2.9372	ASP	ASN	2.9372	3.0176
7B1S	0.99	D	131	HELIX	HELIX	SHEET	-55.7212	-50.2327	177.861	172.568	-63.6209	-45.2128	-177.952	-68.0347	-32.7285	174.549	Alpha-R	Alpha-R	Alpha-R	100.05	2.82584	2.92727	GLN	TYR	2.92727	2.82584
7B1S	0.99	C	146	HELIX	HELIX	HELIX	-123.386	98.716	162.891	177.157	-85.8861	128.029	-168.617	-85.9719	4.39886	175.003	Beta	Beta	Alpha-R	121.813	3.89573	3.47018	ILE	ASP	3.47018	3.89573
7BBX	0.85	A	87	HELIX	HELIX	HELIX	-58.7127	-42.3045	179.439	-75.524	-60.4507	-40.5636	177.777	-66.4884	-40.1686	176.584	Alpha-R	Alpha-R	Alpha-R	102.312	2.87005	2.9159	ALA	ASP	2.9159	2.87005
7BBX	0.85	A	38	N/A	SHEET	N/A	-123.082	9.70196	-178.34	-75.0422	173.612	176.406	-172.922	-94.6656	136.028	-167.76	N/A	N/A	Beta	110.676	3.87641	4.20542	VAL	GLY	4.20542	3.87641
7BBX	0.85	A	90	HELIX	HELIX	HELIX	-87.8496	-4.01587	-169.888	-67.1885	-66.7331	-42.6792	-179.479	-64.5175	-36.9223	-175.082	Alpha-R	Alpha-R	Alpha-R	109.07	3.42385	2.9371	VAL	LEU	2.9371	3.42385
7BGG	1.04	A	71	N/A	N/A	N/A	-67.6661	-22.8651	-173.268	63.933	55.4184	-135.83	177.457	64.8344	50.7151	-166.196	Alpha-R	PPII-R	Alpha-L	96.8985	3.09513	2.83602	GLY	GLY	2.83602	3.09513
7BLA	1.09	A	1869	N/A	HELIX	HELIX	-58.0659	-47.1702	-178.203	-177.767	-67.1098	-35.7015	178.66	-62.4377	-40.4088	177.374	Alpha-R	Alpha-R	Alpha-R	108.044	2.90668	3.04886	ASN	GLN	3.04886	2.90668
7BLA	1.09	A	1802	N/A	HELIX	HELIX	-62.7459	-39.5409	177.632	-68.865	-61.7024	-40.6178	-179.216	-72.036	-23.7488	-179.868	Alpha-R	Alpha-R	Alpha-R	103.893	2.93537	2.93811	PHE	GLU	2.93811	2.93537
7BLK	1.06	A	154	SHEET	N/A	SHEET	-156.099	124.765	176.091	177.293	-73.3037	-51.0333	173.722	-145.136	161.152	-176.207	Beta	Alpha-R	Beta	94.5753	4.14794	3.18184	SER	ALA	3.18184	4.14794
7CKA	1.06	A	141	HELIX	HELIX	HELIX	-56.3668	-47.9231	-179.454	173.185	-67.2165	-40.2409	178.752	-57.2302	-37.5259	176.785	Alpha-R	Alpha-R	Alpha-R	103.107	2.88332	3.00896	ILE	HIS	3.00896	2.88332
7CKA	1.06	A	206	HELIX	HELIX	HELIX	-56.5814	-50.3196	-179.784	177.687	-58.1525	-37.7025	-175.449	-60.0686	-42.7573	174.018	Alpha-R	Alpha-R	Alpha-R	105.762	2.92089	2.87307	HIS	LEU	2.87307	2.92089
7D8D	1.05	A	157	HELIX	HELIX	HELIX	-58.2596	-41.1286	-179.853	-75.9303	-56.1748	-45.9751	178.749	-64.459	-39.1183	178.482	Alpha-R	Alpha-R	Alpha-R	100.534	2.91395	2.8266	ARG	ILE	2.8266	2.91395
7D8D	1.05	A	138	SHEET	SHEET	SHEET	-118.817	99.7165	-172.678	-52.4456	-119.927	124.12	169.122	-107.721	116.217	-173.687	Beta	Beta	Beta	130.941	3.84269	3.81308	TRP	GLN	3.81308	3.84269
7D8D	1.05	A	141	HELIX	HELIX	N/A	-139.88	-22.9314	-170.022	60.3077	-71.1129	-12.2213	172.833	59.1551	33.5425	-177.737	N/A	Alpha-R	Alpha-L	125.781	4.11532	3.0364	TRP	VAL	3.0364	4.11532
7E2S	1.05	A	117	HELIX	HELIX	HELIX	-65.9462	-42.5665	175.637	-70.7013	-58.1657	-44.0398	179.748	-66.0354	-37.702	174.591	Alpha-R	Alpha-R	Alpha-R	101.452	2.99178	2.93941	LEU	GLU	2.93941	2.99178
7KR0	0.77	A	143	HELIX	HELIX	HELIX	-56.7009	-53.4311	-177.469	-176.954	-59.8619	-39.6417	-175.659	-62.5092	-40.4526	177.13	Alpha-R	Alpha-R	Alpha-R	105.883	2.84545	2.90247	VAL	VAL	2.90247	2.84545
7KR0	0.77	A	81	SHEET	SHEET	SHEET	-142.954	161.639	176.865	66.531	-114.454	-62.9573	-177.354	-155.66	165.873	164.499	Beta	N/A	Beta	125.349	4.16664	3.81053	SER	VAL	3.81053	4.16664
7KR0	0.77	A	92	SHEET	SHEET	SHEET	-114.037	119.862	172.343	179.392	-90.8043	103.888	178.392	-126.58	149.755	165.647	Beta	Beta	Beta	137.762	3.8558	3.51897	HIS	LEU	3.51897	3.8558
7LKL	1.05	A	154	SHEET	SHEET	SHEET	-108.717	101.57	177.953	-176.195	-73.4773	161.07	176.376	-98.2386	131.113	170.68	Beta	Beta	Beta	91.1368	3.796	3.18751	ILE	PRO	3.18751	3.796
7LKL	1.05	B	130	SHEET	SHEET	SHEET	-110.116	131.075	170.51	-174.317	-126.301	134.8	-170.833	-84.5541	120.028	-172.825	Beta	Beta	Beta	121.424	3.60042	4.01517	LYS	ARG	4.01517	3.60042
7LKL	1.05	A	118	HELIX	HELIX	HELIX	-59.1783	-44.75	179.366	-73.2188	-62.6978	-43.3674	-177.181	-69.2561	-38.3973	176.704	Alpha-R	Alpha-R	Alpha-R	99.7399	2.89945	2.94157	ARG	GLU	2.94157	2.89945
7LKL	1.05	B	170	HELIX	HELIX	HELIX	-55.5601	-48.1113	-179.411	-72.4094	-60.0413	-46.8637	-174.15	-67.8297	-39.053	174.33	Alpha-R	Alpha-R	Alpha-R	98.7198	2.95356	2.89427	ALA	ASN	2.89427	2.95356
7LKL	1.05	A	81	HELIX	HELIX	HELIX	-61.0073	-41.4953	-178.674	-71.1313	-69.8368	-32.3406	172.513	-64.0584	-37.6562	178.067	Alpha-R	Alpha-R	Alpha-R	105.961	2.93924	3.06272	GLN	PHE	3.06272	2.93924
7LKL	1.05	B	340	HELIX	HELIX	HELIX	-56.6933	-49.906	-167.029	-69.7761	-78.1094	-35.0873	-170.282	-67.5998	-39.5251	178.336	Alpha-R	Alpha-R	Alpha-R	108.442	2.89163	3.16847	LEU	ARG	3.16847	2.89163
7LKL	1.05	B	62	HELIX	HELIX	SHEET	-99.2083	104.925	-173.688	38.1821	-86.6292	-34.4992	-175.49	-81.668	115.262	176.971	Beta	Alpha-R	Beta	109.373	3.59062	3.49279	LYS	GLN	3.49279	3.59062
7LKL	1.05	B	230	SHEET	SHEET	SHEET	-72.2552	155.426	-175.545	68.9356	-130.047	104.665	170.37	-147.267	144.829	172.436	Beta	Beta	Beta	137.622	3.18591	4.01183	ALA	VAL	4.01183	3.18591
7LOG	0.99	A	97	HELIX	HELIX	HELIX	-63.4354	-42.1197	176.228	-68.7228	-60.3984	-38.9941	177.707	-59.7314	-34.1233	175.882	Alpha-R	Alpha-R	Alpha-R	103.398	2.96619	2.93027	ARG	ALA	2.93027	2.96619
7LOG	0.99	A	54	N/A	N/A	N/A	-97.1183	-21.7408	-177.27	-67.7257	60.7011	27.6041	177.755	-80.8851	105.894	-168.752	Alpha-R	Alpha-L	Beta	113.754	3.52458	2.9139	ASN	ASN	2.9139	3.52458
7LV6	1.1	B	250	N/A	SHEET	N/A	-138.857	167.437	170.774	62.9008	-117.956	139.273	173.295	-81.4782	96.6509	-169.792	Beta	Beta	Beta	119.025	4.01045	3.97178	ASP	MET	3.97178	4.01045
7LV6	1.1	B	350	HELIX	HELIX	HELIX	-67.0215	-43.7981	178.414	175.355	-60.7832	-45.5133	178.909	-60.6682	-43.351	-176.779	Alpha-R	Alpha-R	Alpha-R	100.896	3.03044	2.85109	GLU	ALA	2.85109	3.03044
7MPD	1.05	A	96	N/A	N/A	SHEET	-125.241	-140.76	175.721	58.4999	-88.9068	-56.6457	177.298	-140.536	152.978	172.797	Beta	Alpha-R	Beta	91.5778	3.96263	3.40554	HIS	VAL	3.40554	3.96263
7MW7	1.1	A	56	N/A	SHEET	N/A	-160.751	174.332	172.869	61.48	-153.172	146.691	175.976	-51.0179	138.816	-173.449	Beta	Beta	Beta	117.893	4.2172	4.16773	PRO	ALA	4.16773	4.2172
7MW7	1.1	A	23	HELIX	HELIX	HELIX	-61.3813	-46.0413	178.728	178.443	-64.8791	-44.3396	178.951	-67.7511	-33.9986	174.772	Alpha-R	Alpha-R	Alpha-R	100.707	2.94236	2.9667	LEU	ALA	2.9667	2.94236
7NIY	1.03	A	9	HELIX	HELIX	HELIX	-64.7094	-26.2046	-179.899	-80.0545	-82.1157	-0.260146	-178.478	-57.4076	-43.9156	-179.53	Alpha-R	Alpha-R	Alpha-R	134.475	3.02712	3.43797	ILE	GLY	3.43797	3.02712
7NIY	1.03	A	156	SHEET	SHEET	SHEET	-90.6076	134.925	174.038	-63.5766	-132.529	144.694	175.728	-140.892	118.668	169.11	Beta	Beta	Beta	119.718	3.53139	4.05271	LEU	LEU	4.05271	3.53139
7NIY	1.03	A	80	SHEET	SHEET	SHEET	-127.532	138.949	160.853	-58.3022	-76.3582	143.565	-167.379	-91.0545	127.674	-175.02	Beta	Beta	Beta	105.473	3.99083	3.26381	PHE	ALA	3.26381	3.99083
7NIY	1.03	A	45	N/A	SHEET	N/A	-109.846	41.4071	174.352	62.5201	-124.444	155.849	170.283	40.6574	64.6272	-169.117	N/A	Beta	Alpha-L	114.865	3.76644	3.91617	GLN	SER	3.91617	3.76644
7NIY	1.03	A	90	HELIX	N/A	HELIX	-135.331	91.2036	177.933	177.451	-53.8243	-20.9628	177.816	-69.5491	-38.9384	-178.789	Beta	Alpha-R	Alpha-R	121.329	4.02642	2.90638	ILE	PRO	2.90638	4.02642
7P1Q	0.91	A	298	N/A	N/A	N/A	-145.158	157.319	173.975	-173.362	-62.1037	150.426	170.452	64.1892	68.5857	178.991	Beta	Beta	Alpha-L	90.6685	4.17023	2.97588	ALA	GLN	2.97588	4.17023
7P1Q	0.91	A	255	SHEET	SHEET	SHEET	-151.923	160.51	172.59	63.8315	-100.943	112.101	-175.707	-126.102	142.589	163.173	Beta	Beta	Beta	131.75	4.15518	3.65062	ILE	GLN	3.65062	4.15518
7P1Q	0.91	A	391	SHEET	SHEET	SHEET	-132.42	174.544	-175.959	71.0886	-131.929	128.337	-178.892	-116.288	137.325	177.831	Beta	Beta	Beta	126.686	4.01034	3.9547	ARG	ILE	3.9547	4.01034
7RM7	1.03	A	193	HELIX	HELIX	HELIX	-64.7555	-40.7482	176.635	-68.7748	-62.2198	-49.6716	-178.393	-68.4767	-28.4466	174.061	Alpha-R	Alpha-R	Alpha-R	98.0629	2.85149	2.90735	LEU	VAL	2.90735	2.85149
7RM7	1.03	A	95	HELIX	HELIX	HELIX	-69.4882	-37.3613	-179.816	-67.818	-61.3628	-34.712	-176.68	-56.4882	-53.0423	-174.275	Alpha-R	Alpha-R	Alpha-R	105.109	3.04117	2.83268	PHE	LYS	2.83268	3.04117
7RM7	1.03	A	153	HELIX	HELIX	HELIX	-67.4707	-25.6659	174.216	-64.75	-64.4839	-53.514	177.196	-77.1404	117.204	179.52	Alpha-R	Alpha-R	Beta	91.4447	3.06062	3.05889	ASP	ILE	3.05889	3.06062
7RWG	0.97	A	56	SHEET	SHEET	SHEET	-105.031	109.013	170.739	-172.64	-88.7829	148.236	174.83	-145.62	72.8582	-169.782	Beta	Beta	Beta	107.577	3.6035	3.45462	ALA	GLU	3.45462	3.6035
7RWG	0.97	A	149	N/A	N/A	N/A	70.4811	32.6689	-178.952	-112.808	-122.678	157.001	174.504	-79.6348	4.63166	169.581	Alpha-L	Beta	Alpha-R	112.454	3.06425	3.91146	GLU	MET	3.91146	3.06425
7RWG	0.97	A	34	HELIX	HELIX	HELIX	-63.6127	-43.5871	176.459	-69.8732	-58.1479	-46.5481	-178.488	-54.5486	-47.221	-177.377	Alpha-R	Alpha-R	Alpha-R	100.146	2.97844	2.86104	ILE	ASP	2.86104	2.97844
7RWG	0.97	A	311	N/A	N/A	N/A	-134.421	161.369	162.416	-57.7988	-100.8	-23.7238	-175.367	-89.0014	-30.8017	179.835	Beta	Alpha-R	Alpha-R	116.234	4.08956	3.74337	LEU	ARG	3.74337	4.08956
7RWG	0.97	A	104	N/A	SHEET	N/A	-72.0111	165.927	172.599	65.7951	-85.0003	131.169	170.275	-128.235	-0.396179	176.519	Beta	Beta	N/A	115.599	3.08967	3.42687	THR	ASN	3.42687	3.08967
7RWG	0.97	A	214	HELIX	HELIX	N/A	-94.0878	164.329	-174.551	77.455	-60.5814	-40.1917	-178.034	-76.4337	142.013	-178.745	Beta	Alpha-R	Beta	102.115	3.41451	2.90217	VAL	LEU	2.90217	3.41451
