# Supplementary material for: Synthesis and conformational preferences of peptides and proteins with cysteine sulfonic acid
Source: Royal Society of Chemistry journal article supplement (doi:10.1039/d3ob00179b), 2023-01-01
Supplement: d3ob00179b3.xlsx [file d3ob00179b3.xlsx]

## Sheet: CSD
PDB ID	Resolution	Chain	Residue	Structure CSD	Structure NextRes	Structure PrevRes	Phi CSD	Psi CSD	Omega CSD	Chi1 CSD	Phi NextRes	Psi NextRes	Omega NextRes	Phi PrevRes	Psi PrevRes	Omega PrevRes	Region CSD	Region NextRes	Region PrevRes	<A C=O---C=O P	O---C=O distance Prev	O---C=O distance Next	PrevRes	NextRes	O--C distNext	O--Cdist Prev	dOD1-N	dOD2-N	dOD1-N1	dOD2-N1	dOD1-CO	dOD2-CO
3R66	2.3	C	78	HELIX	HELIX	HELIX	54.4979	46.2354	-172.801	-79.8907	-110.227	12.9136	-178.569	-61.5465	-43.5999	175.553	Alpha-L	N/A	Alpha-R	139.927	2.81314	3.73055	LYS	ASP	3.73055	2.81314	4.06654	4.36402	6.11097	5.6321	4.97519	4.52082
2HAI	1.58	A	223	HELIX	HELIX	N/A	56.2995	63.2189	-175.088	-144.624	-47.5882	-49.5009	-179.506	-73.6227	105.124	179.28	Alpha-L	Alpha-R	Beta	102.552	2.89057	2.81187	ARG	PHE	2.81187	2.89057	4.54426	4.09481	4.06319	5.25968	3.23139	4.42749
4CHL	2.61	A	247	N/A	N/A	HELIX	57.8787	35.8757	172.408	-150.876	99.8034	-11.9415	-177.854	-122.195	37.3352	173.432	Alpha-L	Alpha-L	N/A	141.138	2.95182	3.57211	ARG	GLY	3.57211	2.95182	4.18179	4.90295	4.72012	5.93736	3.63344	4.63608
1R7A	1.77	A	356	N/A	HELIX	N/A	61.8184	29.9993	179.542	-55.3197	-82.2759	110.396	-179.234	69.1462	25.675	179.372	Alpha-L	Beta	Alpha-L	133.261	3.03841	3.25111	GLY	ASN	3.25111	3.03841	3.08056	4.51198	5.53178	6.27015	4.70363	5.08013
2GCU	1.48	A	246	N/A	N/A	HELIX	66.418	21.1021	-179.346	-172.674	67.7587	21.6886	-176.859	-113.91	27.896	174.038	Alpha-L	Alpha-L	N/A	119.455	3.10033	3.06616	VAL	GLY	3.06616	3.10033	4.94876	4.34806	5.90312	4.79597	4.60236	3.53286
2OPL	1.5	A	56	N/A	SHEET	N/A	67.58	20.6056	177.86	-69.9317	-155.054	151.554	169.743	48.616	44.3179	173.933	Alpha-L	Beta	Alpha-L	119.636	3.15399	4.13491	ALA	ALA	4.13491	3.15399	4.67099	3.9995	6.2515	5.43815	5.03441	4.28451
3H56	1.5	A	312	HELIX	HELIX	HELIX	-96.3573	-28.2427	-178.633	-50.6503	-99.0335	-34.653	-172.656	-60.0925	-53.9097	-165.513	Alpha-R	Alpha-R	Alpha-R	108.966	3.44759	3.5685	ALA	GLU	3.5685	3.44759	3.4648	4.31241	5.55431	5.9238	4.541	4.84508
1TVZ	2	A	111	HELIX	HELIX	HELIX	-92.3703	12.0456	-175.432	31.5763	-93.3689	-24.0188	-158.713	35.7551	-124.114	-175.731	Alpha-R	Alpha-R	PPII-R	115.425	3.4863	3.51138	ALA	TYR	3.51138	3.4863	4.24543	2.96806	6.04124	4.81374	5.12238	4.38415
4WPZ	2.1	A	20	N/A	N/A	N/A	-91.9717	1.86956	179.167	-77.3082	-111.79	146.981	166.61	-59.5329	-18.8873	179.674	Alpha-R	Beta	Alpha-R	114.409	3.50579	3.73724	VAL	GLU	3.73724	3.50579	3.51556	3.24637	5.39199	5.42495	4.30242	4.56387
3SQZ	1.2	A	111	N/A	HELIX	N/A	-89.3016	6.34673	-175.008	-49.4861	-89.0644	-29.7347	-158.018	45.1719	-130.361	-179.739	Alpha-R	Alpha-R	PPII-R	112.582	3.46039	3.55463	ALA	TYR	3.55463	3.46039	4.29743	2.90399	5.8279	4.70917	4.84501	4.27042
4UAM	1.8	A	158	HELIX	HELIX	SHEET	-88.9131	4.41309	175.82	-68.2366	-76.9919	-37.1768	-178.79	53.3626	-144.327	-176.881	Alpha-R	Alpha-R	PPII-R	106.005	3.42517	3.23723	GLY	PHE	3.23723	3.42517	2.8927	3.81794	5.33716	5.45527	4.60681	4.31834
3UIO	2.6	A	138	HELIX	HELIX	HELIX	-87.0311	-40.4249	169.601	-100.524	-58.6321	-70.2198	175.442	-62.7967	-39.6597	-170.837	Alpha-R	Alpha-R	Alpha-R	83.6982	3.30168	3.12942	TYR	GLN	3.12942	3.30168	4.73495	3.67263	5.5704	5.35648	4.52993	4.22545
5NUE	1.35	B	330	HELIX	HELIX	HELIX	-86.0105	-11.7571	177.521	-83.4864	-91.824	149.835	171.203	-66.6289	-22.9276	179.071	Alpha-R	Beta	Alpha-R	109.692	3.36949	3.48395	SER	LEU	3.48395	3.36949	3.0245	4.33842	5.18961	5.45732	4.24669	4.17945
7LR3	2.8	D	604	SHEET	SHEET	SHEET	-85.8794	-46.9959	179.555	-60.9353	-156.707	152.47	-174.739	-68.0482	113.539	-179.974	Alpha-R	Beta	Beta	114.68	3.40438	4.16712	GLU	SER	4.16712	3.40438	4.39598	3.20855	5.65274	5.16092	4.95534	4.16542
5HWR	1.5	A	115	HELIX	HELIX	HELIX	-82.4023	4.38273	178.847	-39.0106	-96.8696	-11.1718	-173.148	43.3723	-128.947	-176.641	Alpha-R	Alpha-R	PPII-R	124.347	3.27386	3.58366	ALA	TYR	3.58366	3.27386	2.8181	4.5098	4.91205	6.17079	4.34299	5.20572
5NAI	1.15	A	198	HELIX	HELIX	SHEET	-81.2434	-0.289164	170.11	-63.8977	-77.0642	-11.878	-179.745	53.0333	-150.061	-170.833	Alpha-R	Alpha-R	PPII-R	127.246	3.17916	3.29654	GLY	ALA	3.29654	3.17916	4.5799	3.05291	6.06315	5.37928	4.93959	4.53693
2ETF	2.29	A	70	N/A	N/A	N/A	-81.2407	-14.8227	179.803	-73.157	-125.848	107.438	179.974	-64.194	-20.7534	-179.998	Alpha-R	Beta	Alpha-R	136.26	3.34106	4.00709	VAL	GLU	4.00709	3.34106	3.65492	4.34823	5.61179	6.03129	4.59681	5.27314
6ESZ	1.84	A	129	HELIX	HELIX	SHEET	-80.9162	-10.2353	-178.703	-60.6613	-106.876	12.8003	-175.017	45.8438	-115.817	-163.837	Alpha-R	Alpha-R	PPII-R	139.634	3.05911	3.68093	GLU	ALA	3.68093	3.05911	4.49732	2.93082	5.88866	4.97801	5.0286	4.5165
3LQY	1.75	A	125	HELIX	HELIX	HELIX	-80.6073	-27.823	179.236	-44.8289	-75.2819	-45.0781	175.619	-116.316	-82.1711	-170.795	Alpha-R	Alpha-R	N/A	96.837	3.24773	3.11901	MSE	ILE	3.11901	3.24773	4.30129	2.84822	5.8374	4.87748	5.03447	4.55387
3PG8	2	A	102	N/A	N/A	N/A	-80.0702	-14.7639	175.14	-109.335	-153.521	148.883	174.756	-76.55	165.534	179.539	Alpha-R	Beta	Beta	118.33	3.28618	4.14425	PRO	SER	4.14425	3.28618	4.12976	3.47954	4.9858	5.41086	3.71303	4.45919
5E68	1.58	A	83	N/A	N/A	N/A	-79.5726	-6.09162	178.966	49.3708	61.3706	29.0491	171.887	-61.972	-24.324	175.686	Alpha-R	Alpha-L	Alpha-R	117.445	3.31311	3.03072	GLY	ARG	3.03072	3.31311	4.13537	3.35703	4.98313	3.05048	4.41233	2.87309
1YSL	1.9	A	111	HELIX	HELIX	HELIX	-79.0047	7.82202	-179.247	-15.2082	-100.352	-14.0087	-178.443	50.9628	-136.55	-179.271	Alpha-R	Alpha-R	PPII-R	122.009	3.27819	3.63438	ALA	TYR	3.63438	3.27819	3.35371	2.59333	5.6141	4.67391	4.72861	4.27039
6DX9	1.5	A	170	N/A	HELIX	N/A	-78.9655	-8.29062	178.248	-78.651	-88.7926	-6.29956	-164.192	82.3937	-152.36	-156.475	Alpha-R	Alpha-R	PPII-R	126.811	3.13565	3.38811	GLY	PHE	3.38811	3.13565	4.6297	3.22229	6.00098	5.58836	4.94024	4.80468
7BUR	1.82	A	164	N/A	HELIX	N/A	-78.5576	-11.8538	-178.963	-69.0629	-83.5136	-11.089	-162.448	79.6945	-167.38	-151.454	Alpha-R	Alpha-R	PPII-R	127.747	3.04657	3.35624	GLY	PHE	3.35624	3.04657	3.24356	4.7261	5.3152	6.0085	4.65359	5.03326
7C9J	2.1	A	116	HELIX	HELIX	HELIX	-78.3627	-18.9388	172.041	57.9604	-69.0356	-37.6368	177.54	-77.3916	165.314	-177.824	Alpha-R	Alpha-R	Beta	106.146	3.05394	3.0913	GLU	ALA	3.0913	3.05394	2.83009	3.82852	3.83708	3.14293	3.87342	3.10761
6G4R	2.62	E	22	HELIX	HELIX	HELIX	-77.8173	-18.9889	172.811	-83.8759	65.6687	-8.57641	172.831	-84.8859	-48.2595	-177.51	Alpha-R	Alpha-L	Alpha-R	145.973	3.25174	3.10757	GLU	LYS	3.10757	3.25174	4.53093	3.1049	5.8805	5.33076	4.97561	4.71051
2FHX	1.9	A	221	HELIX	HELIX	SHEET	-76.9652	-5.06535	170.5	-70.5313	-82.929	-6.07719	172.266	57.9842	-141.345	-165.222	Alpha-R	Alpha-R	PPII-R	128.056	3.14939	3.37103	GLY	MET	3.37103	3.14939	3.56358	4.51238	5.33488	6.12234	4.21923	5.04889
4V2P	1.67	A	121	HELIX	HELIX	HELIX	-76.6521	-7.77403	175.83	45.7844	-98.8562	17.1781	179.211	46.7744	-125.921	-170.652	Alpha-R	Alpha-R	PPII-R	145.138	3.0744	3.64118	SER	LEU	3.64118	3.0744	2.80778	4.38025	4.41727	5.24567	4.11611	4.53698
1VJE	1.64	A	82	N/A	N/A	N/A	-75.1037	-5.7199	173.635	54.2028	58.5823	28.5544	176.253	-56.7439	-30.4625	178.681	Alpha-R	Alpha-L	Alpha-R	120.18	3.20018	2.97278	GLY	ARG	2.97278	3.20018	3.67704	4.46317	3.19794	5.19946	2.9964	4.56697
5B6N	2.9	A	47	HELIX	HELIX	HELIX	-74.7119	-1.70133	178.366	-65.2082	-92.1087	-37.7141	173.519	-91.9984	-39.2074	179.823	Alpha-R	Alpha-R	Alpha-R	105.77	3.17152	3.40202	VAL	THR	3.40202	3.17152	3.7464	2.33239	5.55918	4.77873	4.83147	4.17535
3AWK	2	A	174	HELIX	HELIX	HELIX	-74.5968	-2.54172	177.204	-55.0783	-98.4978	-5.76659	-177.253	64.0551	-149.248	-176.643	Alpha-R	Alpha-R	PPII-R	128.059	3.30698	3.58465	GLY	TYR	3.58465	3.30698	4.67194	3.03311	6.33737	5.53309	5.26149	4.88393
6DXA	2.01	A	169	N/A	HELIX	N/A	-73.8766	-9.93411	176.117	-79.3564	-87.9024	-7.72548	-165.391	81.7013	-155.666	-161.528	Alpha-R	Alpha-R	PPII-R	125.473	3.19843	3.44714	GLY	PHE	3.44714	3.19843	4.46254	2.94498	5.99138	5.42513	4.94643	4.66638
5FQA	1.1	A	198	HELIX	HELIX	SHEET	-73.755	-11.7034	169.261	-55.8896	-60.4598	-26.1242	-173.968	60.5125	-156.52	-171.903	Alpha-R	Alpha-R	PPII-R	118.196	3.07406	3.07553	GLY	LEU	3.07553	3.07406	4.4265	3.6631	5.9022	5.36233	4.91653	4.21922
5W8Q	1.17	A	159	N/A	HELIX	N/A	-73.5053	-7.10829	170.562	-83.5846	-75.2034	-14.2739	-161.882	97.0704	-163.23	-156.304	Alpha-R	Alpha-R	N/A	131.715	3.02115	3.42616	GLY	TYR	3.42616	3.02115	3.06449	4.54297	5.62555	6.19371	4.58934	4.98781
6DXB	1.55	A	169	N/A	HELIX	N/A	-72.7036	-12.7279	179.565	-79.5756	-86.2206	-7.05545	-163.098	97.2407	-170.214	-161.429	Alpha-R	Alpha-R	N/A	125.964	3.06753	3.34072	GLY	PHE	3.34072	3.06753	4.5944	3.15163	5.94723	5.47024	4.92437	4.72594
3UIO	2.6	D	2659	N/A	HELIX	HELIX	-71.9277	-5.79213	174.841	-112.302	-67.3941	-25.1811	178.265	-84.202	6.90533	-174.619	Alpha-R	Alpha-R	Alpha-R	115.686	3.08708	3.1452	PHE	TYR	3.1452	3.08708	3.77619	4.60556	5.60428	6.08804	4.50495	5.03712
1I88	1.45	A	164	N/A	HELIX	N/A	-71.4908	-15.6187	179.191	-81.6496	-88.1564	-2.72386	-170.129	103.872	179.125	-168.849	Alpha-R	Alpha-R	N/A	130.123	3.0738	3.39191	GLY	PHE	3.39191	3.0738	3.07657	4.63882	5.34087	5.84357	4.52038	4.84171
6G4R	2.62	A	215	HELIX	HELIX	HELIX	-71.099	-49.383	-176.958	-87.4156	-76.3732	-12.2892	178.789	-76.1365	-24.1485	-177.752	Alpha-R	Alpha-R	Alpha-R	126.258	3.1305	3.20581	LEU	ARG	3.20581	3.1305	4.4754	2.99264	5.54614	5.19643	4.99413	4.60886
1Q79	2.15	A	197	HELIX	HELIX	HELIX	-71.0526	-46.2578	179.057	-64.8509	-55.5408	-49.0335	179.602	-66.4141	-37.3222	178.949	Alpha-R	Alpha-R	Alpha-R	96.6364	3.0922	2.83686	ARG	ILE	2.83686	3.0922	3.14801	4.98249	5.34665	5.98097	4.94055	5.43806
2D3M	1.6	A	177	HELIX	HELIX	HELIX	-70.9236	-6.88007	177.233	-77.9895	-98.9777	-10.716	-177.355	50.4993	-142.466	-177.765	Alpha-R	Alpha-R	PPII-R	123.668	3.26054	3.58758	GLY	TYR	3.58758	3.26054	4.86438	3.35614	6.26754	5.79376	5.1441	5.00063
6GW3	1.39	A	157	N/A	HELIX	N/A	-70.6827	-11.601	175.157	-83.3845	-86.1946	-6.8492	-167.116	94.4558	-153.874	-159.18	Alpha-R	Alpha-R	N/A	129.171	3.05979	3.49008	GLY	TYR	3.49008	3.05979	4.73631	3.24814	6.07965	5.56574	5.01688	4.68765
7FFA	1.98	A	166	N/A	HELIX	N/A	-70.3273	-13.7215	-179.272	-73.7634	-85.2535	-3.3983	-167.003	94.973	-159.317	-167.042	Alpha-R	Alpha-R	N/A	129.322	3.09333	3.24989	GLY	TYR	3.24989	3.09333	3.13698	4.59878	5.45743	5.98418	4.70576	4.99056
2C9H	1.8	A	194	HELIX	HELIX	HELIX	-68.7958	-17.5246	179.534	-41.6388	-89.9555	-8.26636	-174.561	56.5429	-127.495	-177.065	Alpha-R	Alpha-R	PPII-R	131.444	3.17791	3.49691	ALA	THR	3.49691	3.17791	3.02107	4.68907	5.21624	6.50116	4.93436	5.73703
3I1H	2.2	A	19	HELIX	HELIX	HELIX	-68.641	-49.9125	179.301	173.842	-60.6281	-43.4129	179.922	-72.1823	-29.5162	177.188	Alpha-R	Alpha-R	Alpha-R	102.308	3.08209	2.9854	GLN	VAL	2.9854	3.08209	4.72051	4.53308	3.53617	4.51205	3.31435	3.5287
5V5H	1.5	A	40	HELIX	SHEET	HELIX	-67.8431	-15.7715	167.574	36.4923	-58.2941	-48.8929	-176.833	-106.479	6.35722	-169.05	Alpha-R	Alpha-R	Alpha-R	95.4443	3.01575	2.87271	ASN	PHE	2.87271	3.01575	3.26048	2.55986	3.30367	4.46185	3.2447	4.21525
2NQT	1.58	A	158	HELIX	HELIX	HELIX	-67.7977	-47.871	177.839	55.7739	-61.6984	-47.3693	176.478	-62.5623	157.67	-177.051	Alpha-R	Alpha-R	Beta	99.6534	3.07506	2.95674	GLY	TYR	2.95674	3.07506	2.80602	4.34751	3.55981	4.53183	3.81479	4.49975
2D5F	1.9	A	406	N/A	N/A	N/A	-67.6405	-10.7633	178.685	53.4547	-97.4553	0.625612	179.997	-89.4376	-171.068	-178.604	Alpha-R	Alpha-R	Beta	133.157	3.15054	3.53004	ASN	GLN	3.53004	3.15054	4.44058	2.9625	4.83301	4.41938	4.34387	4.22273
1RTH	2.2	A	280	HELIX	HELIX	HELIX	-67.4522	-42.1845	178.831	-110.263	-50.3836	-40.1099	179.472	-66.3729	-33.3809	178.924	Alpha-R	Alpha-R	Alpha-R	103.294	3.01731	2.81298	LEU	LYS	2.81298	3.01731	5.18658	4.35725	5.93223	5.48662	5.17766	4.32662
1V5I	1.5	A	221	HELIX	HELIX	HELIX	-66.3925	-16.3671	169.315	-56.0838	-90.6617	-27.3173	-179.842	-69.7324	-17.7916	170.01	Alpha-R	Alpha-R	Alpha-R	115.752	3.21584	3.56778	THR	MET	3.56778	3.21584	2.84821	4.37286	4.72537	5.60613	4.39055	4.92251
2HL8	2	A	580	HELIX	HELIX	HELIX	-66.1418	-50.7658	-177.712	-66.6234	-51.3487	-58.4748	173.052	-95.2841	28.0146	-174.203	Alpha-R	Alpha-R	Alpha-R	89.2683	2.93401	3.04389	ASP	GLY	3.04389	2.93401	3.0273	4.52556	4.92703	5.49468	4.56583	5.04905
2E2M	2.6	A	50	HELIX	HELIX	HELIX	-66.0679	-37.7412	178.482	-61.2214	-64.0669	-45.2098	175.633	-63.7716	-40.3775	177.821	Alpha-R	Alpha-R	Alpha-R	99.5597	3.06936	3.03805	VAL	THR	3.03805	3.06936	2.82017	4.69752	5.14383	5.95536	4.75294	5.41948
3SLE	2.52	A	107	SHEET	SHEET	SHEET	-65.8968	-35.2906	-177.634	-130.798	-67.637	-28.5797	-176.132	-61.965	-42.5465	-178.452	Alpha-R	Alpha-R	Alpha-R	113.102	2.94795	3.01623	GLN	MET	3.01623	2.94795	4.86321	3.89072	5.78484	5.30848	4.8919	4.14711
5UC5	2.1	A	164	N/A	HELIX	N/A	-65.8093	-20.1515	-176.682	-68.7166	-85.9774	-8.85882	-169.08	90.2503	-157.161	-164.358	Alpha-R	Alpha-R	N/A	126.462	3.01855	3.37054	GLY	PHE	3.37054	3.01855	3.06843	4.50722	5.50422	6.06949	4.7874	5.03409
4Z37	2	A	2496	N/A	HELIX	HELIX	-65.7288	-13.5396	-179.139	-42.7085	-105.517	13.5827	-170.702	59.9535	-125.329	-169.234	Alpha-R	Alpha-R	PPII-R	140.221	3.04453	3.65113	MET	SER	3.65113	3.04453	2.83301	4.41876	5.04135	5.81957	4.5444	4.98125
1EE0	2.05	A	169	N/A	HELIX	N/A	-65.4037	-9.08555	179.477	-79.8497	-99.791	-1.01884	-167.746	89.2184	-176.714	-167.878	Alpha-R	Alpha-R	PPII-R	125.675	3.11853	3.46352	GLY	ALA	3.46352	3.11853	4.32681	3.97332	5.57102	6.25859	4.52082	5.37433
2P0U	1.9	A	182	N/A	HELIX	N/A	-65.2861	-9.29475	179.821	-59.1424	-93.3992	-7.88769	-177.482	107.082	-165.214	-177.07	Alpha-R	Alpha-R	N/A	125.366	3.18272	3.44399	GLY	PHE	3.44399	3.18272	2.86587	4.58527	5.45793	6.22574	4.65401	5.14231
3IL9	1.85	A	112	HELIX	HELIX	HELIX	-64.9724	-19.0361	179.528	-51.7973	-88.4831	4.403	-169.304	45.4038	-135.655	-175.041	Alpha-R	Alpha-R	PPII-R	136.796	3.01465	3.39629	ALA	ALA	3.39629	3.01465	2.83337	4.45335	5.05162	5.91675	4.5885	5.08197
3ZJG	1.92	A	103	HELIX	HELIX	HELIX	-64.8682	-25.7315	175.122	53.0748	-56.6145	-45.1702	-178.084	-103.514	16.3679	-171.783	Alpha-R	Alpha-R	Alpha-R	95.3027	2.94241	2.746	ASN	LEU	2.746	2.94241	4.32178	2.6299	4.88238	4.16908	4.54795	4.0245
1YBH	2.5	A	340	N/A	N/A	N/A	-64.7839	-16.5258	-179.092	-60.1598	-85.3482	-20.2558	179.764	-47.1202	120.595	-179.2	Alpha-R	Alpha-R	Beta	118.864	3.03482	3.38373	PRO	ASP	3.38373	3.03482	3.97184	3.67062	5.83938	5.63071	4.82227	5.07173
3T6S	2	A	116	HELIX	HELIX	HELIX	-64.2849	-21.5017	-178.61	-41.6201	-86.4052	1.10642	-175.061	43.1033	-134.627	-172.161	Alpha-R	Alpha-R	PPII-R	137.128	3.01271	3.4731	ARG	ASN	3.4731	3.01271	2.81997	3.22265	4.9399	5.3977	4.54805	4.49598
5IZD	2.05	A	281	N/A	N/A	N/A	-63.9613	-18.6493	177.681	-55.7703	-117.894	21.0248	-178.381	-142.051	138.063	179.574	Alpha-R	N/A	Beta	143.207	3.08608	4.01343	SER	ILE	4.01343	3.08608	4.11504	2.76139	5.49708	4.96519	4.86635	4.58031
1OCH	1.8	A	155	N/A	HELIX	N/A	-63.8844	-6.76566	178.871	-52.0549	-114.838	-57.0399	-179.063	-146.321	35.4666	-176.79	Alpha-R	N/A	N/A	99.3182	3.12117	3.78187	GLY	VAL	3.78187	3.12117	3.39171	2.72903	5.57254	5.16737	4.56066	4.63598
6C9U	2.09	A	203	SHEET	SHEET	SHEET	-63.6335	-17.1275	-176.111	-55.4769	-99.1629	3.82212	-165.796	60.2109	-130.627	-170.223	Alpha-R	Alpha-R	PPII-R	134.087	3.06909	3.47655	ALA	SER	3.47655	3.06909	4.40967	2.82083	5.75184	4.95161	4.99688	4.53109
6BKA	1.65	A	53	HELIX	HELIX	HELIX	-63.5294	-24.0061	171.015	62.4973	-63.5343	-38.646	-178.525	-117.69	65.8367	-175.028	Alpha-R	Alpha-R	Beta	105.27	2.9646	2.98586	LYS	ASP	2.98586	2.9646	3.9705	2.83898	4.90351	3.9122	4.29587	3.88752
7B1V	2.04	A	102	HELIX	HELIX	HELIX	-63.3684	-28.6528	177.134	-131.755	-93.4341	-45.6712	-176.26	-64.8229	-28.8271	178.94	Alpha-R	Alpha-R	Alpha-R	98.8247	3.04078	3.51728	ALA	ARG	3.51728	3.04078	4.89192	4.72697	5.81081	4.81118	4.85978	3.61488
3OQP	1.22	A	121	HELIX	HELIX	HELIX	-63.1273	-50.2816	-175.16	-47.1327	-64.2097	-50.4523	-176.234	-131.652	-83.8557	-178.886	Alpha-R	Alpha-R	N/A	90.604	2.94522	2.92469	ASN	ASP	2.92469	2.94522	3.28493	2.74248	5.27013	4.68524	4.51487	4.54343
5VEW	2.7	A	233	HELIX	HELIX	HELIX	-62.7035	-46.0027	179.362	173.126	-66.1887	-26.1968	175.992	-68.2704	-38.4276	177.735	Alpha-R	Alpha-R	Alpha-R	113.314	3.04169	3.06149	LEU	GLN	3.06149	3.04169	5.16614	5.00591	4.52882	5.34467	4.13405	4.39783
3OQI	1.7	B	22	HELIX	HELIX	HELIX	-62.5438	-33.8907	178.915	-71.2619	-70.7364	-33.6861	176.118	-63.952	-37.8706	176.076	Alpha-R	Alpha-R	Alpha-R	107.96	2.99368	3.09509	ASN	ASN	3.09509	2.99368	4.56009	3.27797	5.71362	5.2788	4.95191	4.8569
5IMF	1.04	A	48	HELIX	HELIX	HELIX	-62.2402	-41.0553	178.516	-58.0241	-65.9308	-44.9737	178.566	-67.2948	-41.3161	179.863	Alpha-R	Alpha-R	Alpha-R	97.5424	3.03068	3.08442	GLY	THR	3.08442	3.03068	2.68802	3.07267	5.1035	5.29436	4.69313	4.3923
6PT4	1.45	B	84	HELIX	HELIX	HELIX	-62.0933	-65.5406	-168.569	-50.4665	-68.0402	-44.52	-179.133	-147.919	147.942	-165.841	Alpha-R	Alpha-R	Beta	99.6254	2.90126	2.85637	LEU	SER	2.85637	2.90126	3.3163	2.85254	5.33819	4.80303	4.45304	4.52725
4WQ8	1.4	A	96	HELIX	HELIX	HELIX	-61.905	-46.1392	179.042	-57.4568	-57.5399	-43.4399	-177.677	-63.1881	-38.5313	178.565	Alpha-R	Alpha-R	Alpha-R	100.108	2.98973	2.84529	ASP	PHE	2.84529	2.98973	4.14789	3.13252	5.37905	5.40936	4.13865	4.5033
6DXC	1.54	A	159	N/A	HELIX	N/A	-61.5838	-3.81251	175.293	-65.0137	-93.6941	-0.394901	-164.841	92.3256	-178.356	-176.607	Alpha-R	Alpha-R	N/A	125.658	3.13135	3.34568	GLY	SER	3.34568	3.13135	4.47335	2.98649	6.00475	5.3563	4.99458	4.69467
6UTN	1.79	A	149	HELIX	HELIX	HELIX	-61.0522	-40.0504	-178.349	59.074	-73.1524	-39.0926	-179.159	-118.598	168.435	178.569	Alpha-R	Alpha-R	Beta	103.221	2.97456	3.10331	SER	THR	3.10331	2.97456	4.39562	2.80111	4.44436	3.581	4.44297	3.88782
5F8C	1.83	A	302	HELIX	HELIX	HELIX	-61.0351	-42.6173	177.995	-60.5349	-68.8917	-48.1115	-171.302	-147.699	-74.6435	-168.371	Alpha-R	Alpha-R	N/A	96.8878	2.85868	3.11304	HIS	MET	3.11304	2.85868	4.29483	2.79518	5.69456	5.09894	4.75256	4.47793
5J78	2.1	A	273	N/A	N/A	N/A	-61.028	-24.3021	179.902	-88.3886	-83.4934	-1.08023	-171.69	-90.6482	132.926	-170.158	Alpha-R	Alpha-R	Beta	134.02	2.93446	3.35466	ILE	ALA	3.35466	2.93446	4.29161	4.70754	5.35888	5.97457	4.16402	5.14609
1XW4	2	X	99	HELIX	HELIX	HELIX	-60.9683	-46.1865	178.501	-62.8148	-63.7332	-46.4426	-179.215	45.0598	30.6491	-173.042	Alpha-R	Alpha-R	Alpha-L	95.8769	2.97591	3.03214	GLY	HIS	3.03214	2.97591	4.75602	3.57466	5.79017	5.34886	5.32625	4.37279
3EUO	1.75	A	152	HELIX	HELIX	HELIX	-60.6917	-26.124	179.369	-72.1529	-81.589	3.57795	-168.387	49.2947	-125.036	-171.922	Alpha-R	Alpha-R	PPII-R	135.797	3.0442	3.27534	GLY	SER	3.27534	3.0442	4.57605	3.28549	5.72584	5.32604	4.81528	4.75012
7JH0	2.51	D	153	HELIX	HELIX	HELIX	-59.5844	-29.5519	170.975	55.8116	-68.204	-43.4307	179.288	-88.367	157.899	168.743	Alpha-R	Alpha-R	Beta	95.2097	3.14437	2.9563	SER	THR	2.9563	3.14437	2.96282	3.55486	3.06099	5.08682	3.30279	4.76227
3PHU	2.2	A	40	HELIX	HELIX	HELIX	-59.3726	-23.2014	169.665	40.8262	-58.361	-50.4063	-176.362	-106.551	1.41567	-172.98	Alpha-R	Alpha-R	Alpha-R	98.0436	3.02601	2.8368	ASN	PHE	2.8368	3.02601	3.49473	2.69924	3.43824	4.40697	3.42446	4.18632
4RYB	2.45	A	114	HELIX	HELIX	HELIX	-59.1272	-26.2896	-179.74	-36.895	-91.8065	8.19025	-177.424	58.4091	-134.092	-176.458	Alpha-R	Alpha-R	PPII-R	139.304	2.88066	3.48863	VAL	ALA	3.48863	2.88066	3.45741	4.58194	5.53813	5.76332	4.69164	5.0175
3OP0	2.52	A	189	HELIX	HELIX	HELIX	-58.6859	-29.9372	179.249	-74.2176	-71.2121	-46.0993	177.719	94.1828	-142.036	-177.04	Alpha-R	Alpha-R	N/A	96.3767	2.93865	3.06516	GLY	THR	3.06516	2.93865	3.62412	4.54709	5.29581	5.44105	4.15405	4.55257
6H2U	1.6	A	38	HELIX	HELIX	HELIX	-58.4442	-48.5465	-178.472	-168.322	-62.3008	-51.3397	-176.96	-66.1693	-45.6385	178.015	Alpha-R	Alpha-R	Alpha-R	94.2554	2.95008	2.94633	ALA	MET	2.94633	2.95008	4.27348	4.73472	4.10272	3.62795	3.0139	3.29059
3F5V	1.36	A	34	HELIX	HELIX	HELIX	-58.0158	-30.3403	172.191	36.3467	-53.0441	-42.1573	-179.496	-105.037	9.51062	-176.425	Alpha-R	Alpha-R	Alpha-R	102.83	2.84339	2.85828	SER	TRP	2.85828	2.84339	2.83316	3.30318	4.40141	2.93393	4.30331	3.26377
1UKK	1.6	A	57	HELIX	HELIX	HELIX	-57.773	-52.8038	-170.396	172.872	-65.9609	-39.6687	-176.835	-65.5976	-45.1525	176.065	Alpha-R	Alpha-R	Alpha-R	103.14	2.90004	2.88244	GLY	PHE	2.88244	2.90004	4.61547	5.06582	4.703	4.87098	3.67127	4.46634
7A74	1.6	A	287	HELIX	HELIX	HELIX	-57.7667	-43.6439	178.146	-89.1042	-62.6123	-48.7473	179.465	-62.1993	-46.3757	174.968	Alpha-R	Alpha-R	Alpha-R	96.5248	2.94513	2.98758	THR	VAL	2.98758	2.94513	3.81456	3.35353	5.26758	5.33249	4.15835	4.73807
3TB2	2.3	A	47	HELIX	HELIX	HELIX	-57.757	-39.4965	179.132	-60.9192	-65.9184	-44.4391	179.04	-61.574	-45.6572	178.96	Alpha-R	Alpha-R	Alpha-R	99.9758	3.02379	3.1048	VAL	THR	3.1048	3.02379	3.36894	2.73954	5.25344	4.95908	4.32802	4.56237
2BC0	2	A	44	HELIX	HELIX	HELIX	-57.7062	-17.2492	-178.801	-32.9505	-102.026	4.71595	-179.33	-58.2981	-30.2157	-179.641	Alpha-R	Alpha-R	Alpha-R	133.229	2.94521	3.60139	GLY	GLY	3.60139	2.94521	2.75307	2.96186	4.68627	5.30734	4.41937	4.56388
3MI2	1.2	A	115	HELIX	HELIX	HELIX	-57.6082	-54.6753	-171.979	178.476	-88.4192	-10.6434	-177.885	-68.9553	-47.1964	178.834	Alpha-R	Alpha-R	Alpha-R	124.298	2.94161	3.34344	LYS	HIS	3.34344	2.94161	4.99853	4.52623	4.55745	4.75347	4.25403	3.81504
6YCB	1.26	A	25	HELIX	HELIX	HELIX	-57.5058	-32.9443	178.055	34.2155	-58.3923	-36.6298	177.51	-106.92	26.1853	-178.961	Alpha-R	Alpha-R	Alpha-R	107.253	2.81847	2.92616	SER	TRP	2.92616	2.81847	2.7313	3.06798	4.41874	2.79021	4.29056	3.2314
6B4R	2.55	A	302	N/A	N/A	N/A	-57.0125	-36.7248	-178.355	-81.8517	-105.021	26.7712	175.397	-125.141	133.658	179.194	Alpha-R	Alpha-R	Beta	150.533	2.94876	3.65544	VAL	THR	3.65544	2.94876	3.03669	3.62251	5.21326	5.11837	4.56736	3.99123
1EKQ	1.5	A	198	N/A	HELIX	N/A	-56.986	-42.725	179.826	-52.4394	-63.3917	-37.153	179.785	-72.4597	-45.0711	179.726	Alpha-R	Alpha-R	Alpha-R	103.266	2.86984	2.9304	GLY	LEU	2.9304	2.86984	3.02084	3.58543	5.04666	5.61655	4.78967	4.7166
4LDK	2.04	A	145	HELIX	HELIX	HELIX	-56.498	-42.2217	-176.453	-57.1482	-70.9008	-36.7359	-174.34	-72.8439	-57.6096	172.923	Alpha-R	Alpha-R	Alpha-R	102.75	3.05708	3.08569	GLU	ALA	3.08569	3.05708	2.95547	4.6576	5.1703	5.78271	4.79865	5.12269
1Q79	2.15	A	36	HELIX	HELIX	HELIX	-55.414	-46.1479	179.878	-178.628	-68.897	-35.1086	178.273	-71.6224	-36.995	179.841	Alpha-R	Alpha-R	Alpha-R	108.541	2.83068	3.09509	ASP	LEU	3.09509	2.83068	5.05978	4.83163	3.81903	5.16508	3.45526	4.04836
2ACT	1.7	A	25	HELIX	HELIX	HELIX	-55.242	-29.6725	176.018	56.4415	-53.1728	-39.1254	179.715	-101.136	28.3224	177.329	Alpha-R	Alpha-R	Alpha-R	106.252	2.88932	2.88621	GLY	TRP	2.88621	2.88932	2.75377	3.56894	4.48081	2.9939	4.3084	3.26802
2VB7	1.6	C	163	HELIX	HELIX	HELIX	-54.6285	-27.6135	-171.845	-54.3083	-92.8972	-4.95194	-168.993	50.8151	-128.315	-174.351	Alpha-R	Alpha-R	PPII-R	129.491	3.07864	3.68907	ALA	ALA	3.68907	3.07864	2.90601	2.94431	5.12855	5.39815	4.72873	4.31727
7L1P	1.85	A	130	HELIX	HELIX	HELIX	-54.2466	-49.0229	-178.677	-72.5405	-63.2257	-48.0347	-176.231	-62.8748	-45.9726	176.729	Alpha-R	Alpha-R	Alpha-R	96.5906	2.89712	3.0158	ALA	GLU	3.0158	2.89712	4.11191	3.99516	5.69946	5.80039	5.22812	4.79224
1OBF	1.7	O	154	HELIX	HELIX	HELIX	-54.1526	-45.9974	178.629	59.1913	-68.0478	-38.8402	177.232	-111.51	166.675	173.798	Alpha-R	Alpha-R	Beta	104.68	2.91343	3.10626	SER	THR	3.10626	2.91343	4.45208	2.84009	3.39708	3.05704	3.66141	3.58498
5GK0	2.33	A	126	N/A	HELIX	N/A	-54.0005	-35.6019	-178.484	-53.5125	-85.4914	-7.41124	-177.691	-118.776	-118.458	-171.987	Alpha-R	Alpha-R	N/A	127.066	2.85687	3.27833	ALA	ALA	3.27833	2.85687	4.33062	2.69424	5.81091	4.92613	5.10978	4.48735
2G82	1.65	O	149	HELIX	HELIX	HELIX	-53.7423	-45.1412	-176.674	44.961	-67.492	-40.6929	177.949	-98.1844	163.799	171.647	Alpha-R	Alpha-R	Beta	102.023	2.91382	2.9848	SER	THR	2.9848	2.91382	2.66843	3.74382	3.75137	2.99251	3.9263	3.35874
1MHW	1.9	A	25	HELIX	HELIX	HELIX	-52.7346	-35.625	179.502	41.0695	-57.9618	-37.3412	178.637	-101.651	17.1793	179.596	Alpha-R	Alpha-R	Alpha-R	106.437	2.80793	2.88446	SER	TRP	2.88446	2.80793	2.71583	4.33996	4.15311	4.44351	4.19307	4.41165
4QJE	1.85	A	289	N/A	N/A	N/A	-52.6003	-40.9171	-178.256	61.5607	-101.843	21.4163	178.651	-131.698	134.128	179.105	Alpha-R	Alpha-R	Beta	148.118	2.87701	3.72761	VAL	SER	3.72761	2.87701	4.08415	2.91618	4.60347	2.65161	4.6899	3.25526
5UR0	1.94	D	149	HELIX	HELIX	HELIX	-52.5334	-47.753	-176.904	40.0454	-64.1074	-41.63	175.732	-93.833	169.053	169.094	Alpha-R	Alpha-R	Beta	103.318	2.9287	3.00335	SER	THR	3.00335	2.9287	3.74025	2.43868	2.93756	3.59774	3.43194	3.83116
5C7I	2.01	O	256	HELIX	HELIX	HELIX	-52.468	-43.753	-178.281	41.7819	-64.9195	-48.9687	178.457	-113.081	163.072	176.098	Alpha-R	Alpha-R	Beta	98.5112	2.87288	3.02365	SER	THR	3.02365	2.87288	4.30093	2.70024	4.24229	3.93737	4.38052	4.08892
3BC3	2.2	A	25	HELIX	HELIX	HELIX	-52.0854	-38.0885	179.257	38.7189	-57.9571	-33.7043	179.577	-106.005	17.4327	179.966	Alpha-R	Alpha-R	Alpha-R	109.464	2.80055	2.87924	SER	TRP	2.87924	2.80055	2.91048	4.25824	4.4147	4.25198	4.36416	4.26482
3TKS	2.4	C	87	HELIX	HELIX	HELIX	-51.0678	-54.579	174.232	-64.8047	-62.4083	-37.4802	-175.333	-54.1577	-33.2459	-173.566	Alpha-R	Alpha-R	Alpha-R	102.622	3.03834	3.01162	VAL	PRO	3.01162	3.03834	3.67303	2.84089	5.41986	5.42414	4.30647	4.86073
4ORN	1.71	A	70	HELIX	HELIX	HELIX	-50.9801	-26.6718	-174.991	-49.3236	-93.3786	7.72416	171.492	-69.7035	-5.33684	168.389	Alpha-R	Alpha-R	Alpha-R	136.198	3.00653	3.40242	GLN	PHE	3.40242	3.00653	2.74632	3.22417	4.65675	5.33346	4.36302	4.41947
4I07	1.3	A	100	HELIX	HELIX	HELIX	-50.4449	-39.3482	-179.95	42.4985	-56.3866	-38.5286	-178.32	-101.073	18.1095	176.467	Alpha-R	Alpha-R	Alpha-R	106.295	2.78935	2.85326	SER	TRP	2.85326	2.78935	3.14938	2.85707	2.6037	4.25149	3.11923	4.20989
3P5U	1.5	A	25	HELIX	HELIX	HELIX	-50.2575	-40.1856	176.236	41.7681	-50.2943	-35.4554	-177.225	-101.121	10.3843	-171.935	Alpha-R	Alpha-R	Alpha-R	109.979	2.87981	2.93507	SER	TRP	2.93507	2.87981	3.20307	3.20993	4.78017	2.72215	4.60241	3.17696
3TKK	1.99	A	37	N/A	N/A	N/A	-49.2422	-31.4936	178.574	178.363	-98.9596	28.429	-166.945	-65.7163	175.79	173.841	Alpha-R	Alpha-R	Beta	145.772	3.10924	3.63568	ASP	PHE	3.63568	3.10924	5.28928	5.32018	5.0053	6.09502	4.13281	5.27327
6R6U	1.71	A	355	HELIX	HELIX	HELIX	-47.5771	-32.99	176.065	69.2876	-81.287	-40.4847	-177.181	-62.5201	-40.0124	165.409	Alpha-R	Alpha-R	Alpha-R	103.127	3.06696	3.2573	GLU	GLN	3.2573	3.06696	4.28478	4.43421	3.30799	4.93728	3.29787	4.68656
4EKF	0.98	A	122	HELIX	HELIX	HELIX	-45.3662	-51.3691	179.205	44.5041	-61.2392	-41.1257	176.84	-98.9924	11.3074	178.198	Alpha-R	Alpha-R	Alpha-R	102.215	2.79452	2.9015	ALA	GLY	2.9015	2.79452	4.41689	2.88908	4.89414	4.58621	4.6604	4.39251
6QUN	3	O	149	HELIX	HELIX	HELIX	-45.0896	-41.2228	-177.101	59.1911	-75.9793	-40.9189	174.005	-123.855	156.224	174.726	Alpha-R	Alpha-R	Beta	103.585	2.82467	3.1599	SER	THR	3.1599	2.82467	2.52087	4.19098	3.05054	4.59894	3.48945	4.6672
1QMV	1.7	A	51	N/A	HELIX	N/A	-43.718	-54.7612	175.807	-56.8983	-63.3661	-33.7073	-179.624	-66.4502	-39.2547	-179.728	Alpha-R	Alpha-R	Alpha-R	104.94	2.91955	2.90198	VAL	PRO	2.90198	2.91955	3.5051	2.7134	5.36932	5.28478	4.31557	4.65367
1DNC	1.7	A	63	N/A	N/A	N/A	-42.6813	-62.4141	-177.307	-53.8564	-59.0124	-58.5208	177.38	-143.539	-117.519	-177.169	Alpha-R	Alpha-R	N/A	90.2506	2.80019	3.02163	GLY	VAL	3.02163	2.80019	2.71368	4.50397	4.9404	5.48161	4.55533	5.11937
4NYO	1.8	A	29	N/A	N/A	N/A	-176.556	177.841	-179.144	69.2603	-150.884	154.846	178.088	-85.8073	-29.9716	-179.827	Beta	Beta	Alpha-R	115.2	4.23384	4.15474	ALA	ALA	4.15474	4.23384	4.55308	3.55909	3.7805	4.90535	3.80031	4.22251
6N1A	1.6	A	98	SHEET	SHEET	SHEET	-170.669	157.245	155.825	-117.389	67.5865	55.7055	-179.56	-98.3744	164.976	-171.891	Beta	Alpha-L	Beta	92.9287	4.25513	2.9954	ASN	ASP	2.9954	4.25513	4.65721	4.82783	3.6076	5.20282	3.87801	4.91546
6Z8M	1.02	B	75	SHEET	SHEET	SHEET	-165.461	127.997	179.717	174.207	-92.747	-1.07569	169.435	-57.5965	-34.5427	-171.528	Beta	Alpha-R	Alpha-R	132.192	4.13542	3.51859	ILE	GLY	3.51859	4.13542	4.54676	4.4778	3.27506	4.50141	3.19156	4.29305
3C5Y	1.81	A	72	SHEET	N/A	SHEET	-162.929	-161.373	-176.726	55.1424	-54.1566	-41.7562	-179.831	154.639	-174.641	-178.04	Beta	Alpha-R	N/A	104.59	4.26308	2.7886	GLY	GLY	2.7886	4.26308	3.45568	2.94571	3.16331	4.76497	3.0615	4.13521
4U8E	2	A	72	SHEET	N/A	SHEET	-160.536	-161.768	179.619	56.0063	-44.8326	-58.9808	179.195	153.269	-171.801	176.122	Beta	Alpha-R	N/A	90.9588	4.22108	2.73713	GLY	GLY	2.73713	4.22108	3.59107	2.74997	3.15869	4.66753	3.10801	3.96733
7CTM	1.85	A	181	N/A	HELIX	SHEET	-159.352	136.432	-173.441	-169.147	-103.021	28.5686	178.519	-122.346	126.909	172.716	Beta	Alpha-R	Beta	151.303	4.26794	3.62057	PHE	HIS	3.62057	4.26794	4.78996	4.92489	3.58419	4.98538	3.43957	4.67602
4AY7	1.8	A	77	N/A	N/A	N/A	-157.579	161.412	176.634	69.9117	-109.974	38.053	-175.906	-120.621	23.4051	-167.882	Beta	N/A	N/A	156.255	4.09424	3.87237	TYR	LEU	3.87237	4.09424	4.18474	4.02669	5.21263	3.4245	4.52118	3.08848
4OMR	1.85	A	156	SHEET	N/A	SHEET	-155.124	140.036	178.397	78.6278	-99.6921	89.1073	-172.74	-111.043	141.64	171.089	Beta	Beta	Beta	153.345	4.14816	3.5252	LEU	MSE	3.5252	4.14816	3.87494	4.37095	5.29119	3.71151	4.38551	3.31548
2V9S	2	A	386	N/A	N/A	N/A	-154.626	161.174	177.937	78.2673	-125.38	128.856	164.383	-103.268	-16.0283	171.24	Beta	Beta	Alpha-R	125.54	4.19551	3.9413	ASN	LEU	3.9413	4.19551	4.34044	3.03546	3.33058	4.31925	3.16261	3.39073
6ZK6	1.9	A	127	HELIX	HELIX	N/A	-152.845	128.174	-174.259	-169.124	-57.1945	-43.8026	-173.848	-90.464	63.5893	-175.912	Beta	Alpha-R	Beta	105.433	4.2455	2.86166	GLU	ALA	2.86166	4.2455	4.51982	4.63647	3.79265	3.28365	3.7915	3.09261
1Q9U	1.8	A	57	SHEET	HELIX	SHEET	-151.478	134.801	-179.654	165.611	-111.085	103.889	-178.719	-122.318	152.01	-177.836	Beta	Beta	Beta	136.131	4.12881	3.65391	VAL	ASN	3.65391	4.12881	4.43932	4.59671	3.00106	3.11857	2.71707	3.36865
6IKT	1.9	A	99	N/A	N/A	N/A	-150.776	133.09	174.32	-159.842	-63.8009	-21.8411	176.389	-127.5	179.126	179.984	Beta	Alpha-R	Beta	119.784	4.03331	3.00688	GLY	LEU	3.00688	4.03331	4.47214	5.08841	3.17999	4.92298	3.16855	4.45171
2EG3	1.8	A	191	N/A	N/A	SHEET	-149.142	-125.581	-179.164	41.8391	-86.4306	-56.3767	-178.672	-158.411	164.438	174.392	Beta	Alpha-R	Beta	91.1186	4.13958	3.28679	TYR	HIS	3.28679	4.13958	4.46339	3.31554	4.21924	2.85133	4.58877	3.17245
6JFO	1.6	A	111	N/A	N/A	N/A	-148.891	136.159	176.512	-165.817	-61.5318	-21.6034	177.876	-133.012	165.778	-172.359	Beta	Alpha-R	Beta	121.054	4.09745	2.99055	GLY	LEU	2.99055	4.09745	4.58935	4.8789	3.18557	5.11951	3.17666	4.60954
3L87	2	A	131	N/A	N/A	N/A	-148.85	130.626	169.927	-159.571	-45.6719	-28.5605	179.532	-129.304	168.025	177.324	Beta	Alpha-R	Beta	120.471	4.19511	2.94898	GLY	LEU	2.94898	4.19511	4.87752	4.57267	4.82108	3.05121	4.37005	3.12379
2WLR	1.45	A	365	N/A	N/A	SHEET	-148.155	-141.856	175.772	62.9372	-61.4482	-55.1452	-175.056	-148.724	167.398	169.786	Beta	Alpha-R	Beta	91.8761	4.17904	2.93999	TYR	GLY	2.93999	4.17904	3.14987	4.56993	4.34616	3.84139	4.07734	4.28584
6MU0	1.1	A	69	SHEET	N/A	SHEET	-147.949	-177.729	-174.696	61.9765	-46.1012	-51.8048	-178.826	-126.471	130.734	167.904	Beta	Alpha-R	Beta	99.5647	4.16312	2.737	ILE	GLY	2.737	4.16312	4.47001	4.02332	4.79028	3.02209	4.58995	3.02232
6G5M	2.31	A	131	N/A	N/A	N/A	-147.475	73.8369	-179.441	-118.072	-72.788	64.4228	-175.009	-115.7	7.70667	158.763	Beta	Beta	N/A	174.308	4.23385	3.04695	THR	PRO	3.04695	4.23385	3.80415	4.81201	5.08042	6.40914	4.25044	5.22905
2Z1D	2.07	A	38	N/A	N/A	N/A	-147.203	116.476	178.299	-169.664	-51.7707	-38.3369	-179.266	-135.23	53.7792	-177.965	Beta	Alpha-R	N/A	107.641	4.13372	2.82602	VAL	GLY	2.82602	4.13372	4.49228	4.90364	4.04835	4.00101	3.89702	3.54539
1OBB	1.9	A	174	N/A	HELIX	SHEET	-144.795	156.366	-179.832	-167.313	-93.1129	-2.49394	-178.971	-131.098	140.624	178.998	Beta	Alpha-R	Beta	132.612	4.18572	3.55666	PHE	HIS	3.55666	4.18572	4.80283	4.9942	4.47379	3.69963	4.55469	3.85069
6I7Q	1.8	B	89	SHEET	N/A	SHEET	-144.508	117.253	177.532	-179.201	-120.311	113.9	-179.643	-62.3635	127.285	-176.732	Beta	Beta	Beta	134.218	4.09283	3.8857	LEU	ILE	3.8857	4.09283	4.55922	4.4236	3.33546	3.26287	2.94148	3.3606
5WSF	1.11	A	106	SHEET	SHEET	SHEET	-144.135	119.329	-178.161	-172.232	-115.215	138.064	179.829	-78.4949	140.409	-178.898	Beta	Beta	Beta	120.841	4.09306	3.85119	LEU	LEU	3.85119	4.09306	4.50122	5.00079	3.22693	5.18126	2.88872	4.51444
4U85	1.7	A	113	HELIX	HELIX	N/A	-141.426	147.675	-176.451	-166.745	-65.8244	-18.5164	171.302	-86.0326	32.6582	-169.811	Beta	Alpha-R	N/A	117.853	4.11098	3.01798	ASP	SER	3.01798	4.11098	4.37612	4.82603	3.56067	3.30512	3.80544	3.49128
3SED	1.3	A	69	SHEET	SHEET	SHEET	-141.253	146.021	169.704	59.6829	-63.9957	140.401	-179.883	-144.415	133.511	176.555	Beta	Beta	Beta	101.535	3.98473	3.00928	ALA	LEU	3.00928	3.98473	4.70286	3.05721	5.71476	5.44288	5.04675	4.50931
3GEF	1.5	A	522	N/A	N/A	N/A	-136.904	149.326	179.492	-24.296	145.345	-173.161	-176.488	107.339	148.434	-167.932	Beta	N/A	N/A	114.823	3.99122	4.00964	GLY	GLY	4.00964	3.99122	4.5423	3.40923	6.5022	5.94592	5.59757	4.73464
4PSS	0.85	A	152	SHEET	SHEET	SHEET	-135.499	121.62	172.284	-176.672	-81.7987	132.889	176.872	-160.42	158.257	-174.461	Beta	Beta	Beta	135.551	4.03495	3.32105	TYR	PHE	3.32105	4.03495	4.95563	4.68531	4.75653	4.52026	4.1155	4.22975
1VI9	1.96	A	53	SHEET	SHEET	SHEET	-135.171	159.01	-179.643	64.6594	-100.775	135.869	178.495	121.705	-176.646	-179.538	Beta	Beta	N/A	110.36	4.0345	3.63288	GLY	VAL	3.63288	4.0345	4.28316	4.3144	3.69155	5.28159	3.27704	4.60253
1OKI	1.4	A	79	N/A	N/A	N/A	-135.139	122.196	-176.328	-169.832	-88.4244	-13.3338	-178.441	-65.3716	152.721	173.025	Beta	Alpha-R	Beta	125.713	4.04937	3.46872	GLU	SER	3.46872	4.04937	4.45294	4.35382	3.19106	4.11707	2.98032	3.93715
2RIL	1.26	A	87	N/A	N/A	N/A	-134.379	114.492	169.21	-171.502	-91.603	175.504	-179.468	-63.7499	128.58	-174.38	Beta	Beta	Beta	92.4329	3.9882	3.62524	LEU	GLY	3.62524	3.9882	4.0664	4.89483	3.38733	4.52755	3.2606	3.76155
3FIV	1.85	A	84	N/A	N/A	N/A	-134.313	130.575	177.559	166.874	-140.374	158.171	173.168	-147.176	157.534	-179.526	Beta	Beta	Beta	111.584	3.9237	4.10799	GLN	ILE	4.10799	3.9237	4.66595	4.74587	3.70397	3.69516	3.28226	3.71122
4IW7	2.25	A	330	SHEET	SHEET	SHEET	-133.582	137.115	178.521	-178.218	-149.225	150.548	170.963	-116.84	160.644	-169.562	Beta	Beta	Beta	117.399	4.00375	4.13391	SER	PHE	4.13391	4.00375	4.33707	4.9927	3.88153	4.85192	3.81205	4.41663
1QFM	1.4	A	601	N/A	N/A	N/A	-132.808	135.419	-177.615	-162.849	-61.0649	-8.46167	178.269	100.179	179.54	178.336	Beta	Alpha-R	N/A	133.285	3.99538	3.09677	GLY	SER	3.09677	3.99538	4.89836	5.06249	3.57133	5.17498	3.5534	4.84204
6FXS	2.01	A	72	SHEET	N/A	SHEET	-132.25	-161.021	-177.911	77.8655	-64.588	-45.2891	-175.481	-128.395	120.501	171.647	Beta	Alpha-R	Beta	96.53	4.03397	2.9638	VAL	GLY	2.9638	4.03397	3.11899	4.74219	4.19979	4.62492	3.76554	4.74594
5FZO	1.84	A	2317	N/A	N/A	N/A	-129.635	118.912	179.618	-90.2448	-119.404	134.003	177.228	-103.27	131.512	177.976	Beta	Beta	Beta	125.13	3.994	3.80108	LEU	SER	3.80108	3.994	3.29766	4.6366	5.61715	5.62634	4.72654	4.90859
5UR0	1.94	D	300	SHEET	SHEET	SHEET	-128.459	147.516	176.319	44.7889	-82.1891	-46.121	175.393	-134.233	158.009	164.852	Beta	Alpha-R	Beta	99.3308	3.99046	3.24364	ILE	LEU	3.24364	3.99046	2.29987	3.50121	4.55761	5.48143	3.31967	4.57093
1YM9	2	A	473	N/A	N/A	SHEET	-128.154	-144.95	-178.881	48.0683	-75.7541	-58.4745	179.812	-159.146	158.112	176.043	Beta	Alpha-R	Beta	90.0314	3.99396	3.24098	HIS	GLU	3.24098	3.99396	3.46317	3.06108	3.04533	4.64963	3.18255	4.24661
3SMH	2.43	A	266	SHEET	SHEET	SHEET	-127.326	113.756	179.578	-166.977	-117.34	131.84	-179.621	-128.936	144.14	178.555	Beta	Beta	Beta	125.716	3.96164	3.7975	THR	VAL	3.7975	3.96164	4.79073	4.54259	5.04446	3.30683	4.60727	3.24774
5LRY	1.4	L	576	HELIX	HELIX	N/A	-127.092	99.9631	-173.101	-165.513	-77.7301	-29.5888	171.368	-61.0449	135.16	171.207	Beta	Alpha-R	Beta	109.647	4.04059	3.23676	PRO	LEU	3.23676	4.04059	4.45335	4.47489	4.50983	3.2699	4.11954	2.87683
4TTG	1.6	A	247	SHEET	N/A	SHEET	-126.592	158.526	172.517	-85.994	106.787	-144.162	-164.237	-120.447	161.16	168.286	Beta	N/A	Beta	115.969	4.05091	3.57186	MET	GLY	3.57186	4.05091	4.52324	4.01472	5.43941	4.48288	5.00434	4.32538
5VF5	1.49	A	67	SHEET	N/A	SHEET	-123.684	156.873	177.286	-62.303	-97.5759	30.166	171.201	-124.48	166.14	174.055	Beta	N/A	Beta	154.965	3.98172	3.52932	HIS	ASP	3.52932	3.98172	3.41507	4.45888	5.56118	5.15555	4.76455	4.91886
3UIO	2.6	A	93	N/A	HELIX	N/A	-123.555	104.258	-169.424	-144.087	-145.119	135.882	-168.27	-83.7289	140.319	-176.97	Beta	Beta	Beta	121.033	3.88397	4.11977	VAL	LEU	4.11977	3.88397	4.26848	4.55125	4.84426	3.70938	4.39259	3.41737
2C47	2.4	A	111	SHEET	N/A	SHEET	-123.353	85.2971	170.415	-108.999	74.2929	-128.541	177.568	-68.7277	131.934	163.932	Beta	PPII-R	Beta	112.315	4.10842	3.03638	PRO	GLY	3.03638	4.10842	5.67123	4.93472	6.12558	6.61345	5.30509	5.62236
4M5P	1.5	A	113	SHEET	N/A	SHEET	-123.222	160.704	178.775	141.101	-157.931	119.596	-171.611	-81.6024	122.211	-172.996	Beta	Beta	Beta	119.225	3.91383	4.20252	LEU	PHE	4.20252	3.91383	4.99099	4.34445	4.0444	3.00467	4.38111	3.54826
2J16	2.7	A	140	N/A	N/A	SHEET	-123.174	-153.992	173.603	37.0893	-160.226	118.7	10.5978	-140.37	145.531	164.963	Beta	Beta	Beta	119.911	4.01454	4.25935	HIS	GLN	4.25935	4.01454	2.91335	4.41465	3.43066	4.42974	3.04597	4.56935
3QOR	1.75	B	188	N/A	N/A	N/A	-121.611	99.3141	-177.211	-170.92	-131.962	162.596	-175.423	-124.816	142.836	-178.911	Beta	Beta	Beta	111.004	3.81235	3.98601	PHE	VAL	3.98601	3.81235	4.85276	4.77869	4.94798	4.72279	4.40601	3.79264
1EU1	1.3	A	219	N/A	N/A	SHEET	-120.575	131.524	-179.5	-99.5713	-97.6293	100.965	-168.951	-122.882	129.5	171.166	Beta	Beta	Beta	137.343	3.7727	3.63538	ILE	ILE	3.63538	3.7727	4.48172	4.02637	5.78507	4.69611	4.82159	4.1689
2PVZ	1.97	A	107	N/A	N/A	N/A	-120.524	107.863	-177.758	-166.993	-70.4291	-31.96	178.141	-92.5358	165.747	167.438	Beta	Alpha-R	Beta	111.277	3.96072	3.20775	ASN	GLY	3.20775	3.96072	4.55062	4.52317	4.53099	3.37538	4.24389	2.95997
3EU7	2.2	A	1127	N/A	N/A	N/A	-119.621	141.252	179.632	-47.1281	-121.229	132.693	172.138	-110.441	27.0998	171.316	Beta	Beta	N/A	123.038	3.8219	3.90368	HIS	ALA	3.90368	3.8219	3.58286	4.57225	5.96874	5.63581	4.96389	5.21233
5W3V	2.24	B	73	N/A	SHEET	N/A	-118.078	142.127	-176.562	-75.6101	-131.561	139.37	170.458	-92.5844	171.419	174.178	Beta	Beta	Beta	122.695	3.87151	3.96548	GLN	TYR	3.96548	3.87151	3.15793	4.0701	4.86308	5.723	4.36249	5.01007
4KPH	2.59	H	79	SHEET	SHEET	SHEET	-117.933	155.986	177.503	-50.6626	-121.021	133.221	177.878	-130.176	151.359	-168.483	Beta	Beta	Beta	123.482	3.75895	3.91742	TYR	LEU	3.91742	3.75895	3.71677	3.38222	5.23329	5.83137	4.78678	4.9205
4AGI	1.6	A	244	SHEET	SHEET	SHEET	-116.255	126.046	160.493	-58.2149	-102.714	119.242	169.746	-121.168	131.501	-170.164	Beta	Beta	Beta	127.61	3.72178	3.79644	VAL	TRP	3.79644	3.72178	3.27242	4.53937	5.88344	5.8088	4.84243	5.03295
1OEU	2.5	A	215	N/A	N/A	SHEET	-115.999	-141.038	179.219	30.3945	-78.1187	-40.7857	-177.978	-152.969	149.408	158.334	Beta	Alpha-R	Beta	103.904	3.90805	3.16371	HIS	SER	3.16371	3.90805	4.46535	3.16801	4.47544	3.3567	4.6403	3.33215
6RIZ	1.85	A	83	SHEET	SHEET	N/A	-115.019	143.142	169.405	-45.3131	-109.199	169.557	177.697	-87.0797	168.052	-176.088	Beta	Beta	Beta	101.324	3.78013	3.75238	MET	LEU	3.75238	3.78013	3.32049	2.7738	5.29425	5.59089	4.66991	4.50849
1FNK	2	A	75	SHEET	SHEET	SHEET	-112.163	117.47	-179.106	-45.6814	-108.299	163.696	178.845	-132.858	148.183	-178.181	Beta	Beta	Beta	104.41	3.7719	3.69201	THR	MET	3.69201	3.7719	4.26502	3.26972	5.80021	5.86773	5.04234	4.76043
5H5S	1.85	A	73	N/A	N/A	N/A	-111.072	153.169	174.123	-162.242	-57.9603	-27.0166	179.005	-119.496	48.9789	179.108	Beta	Alpha-R	N/A	115.983	3.81223	2.98878	GLN	GLY	2.98878	3.81223	4.33794	5.02132	3.00527	3.45971	3.39938	3.68501
2QUG	2	A	232	SHEET	N/A	SHEET	-108.901	121.902	-176.059	-169.045	-64.4745	-40.5768	-169.932	-93.7717	133.633	-179.348	Beta	Alpha-R	Beta	108.676	3.71154	3.14163	HIS	LYS	3.14163	3.71154	4.93228	4.41788	4.80586	3.93927	4.31505	3.89822
3UIP	2.29	A	93	N/A	HELIX	SHEET	-107.757	114.239	-177.593	-81.0353	-142.518	137.802	-175.556	-86.1951	133.326	170.718	Beta	Beta	Beta	119.334	3.77514	4.08871	VAL	LEU	4.08871	3.77514	2.97321	3.78682	5.36856	4.6837	4.48034	4.30041
2OJP	1.7	A	20	HELIX	HELIX	N/A	-106.074	103.463	-170.799	-167.638	-65.07	-40.3704	-178.33	-60.2438	134.28	-173.863	Beta	Alpha-R	Beta	105.941	3.65007	3.04313	VAL	ARG	3.04313	3.65007	4.63688	4.99892	3.82652	5.50551	3.21638	4.65902
6YG4	2.3	A	218	SHEET	HELIX	SHEET	-104.636	158.708	-174.378	54.2096	-61.0938	-36.9796	-179.773	-168.696	173.021	173.574	Beta	Alpha-R	Beta	109.673	3.84538	3.11454	THR	ALA	3.11454	3.84538	4.09731	4.03542	3.95163	5.64678	3.41394	4.77262
5Y0T	1.9	A	42	N/A	N/A	N/A	-103.685	176.918	-171.792	52.8723	-64.0425	-22.9484	178.126	-131.306	138.54	-178.2	Beta	Alpha-R	Beta	121.132	3.62591	3.07201	PHE	GLN	3.07201	3.62591	4.52323	3.73968	4.60675	3.36799	4.45433	2.97912
1TO9	2.4	B	149	N/A	N/A	N/A	-102.917	166.169	174.021	-70.9664	-134.074	85.696	172.659	-69.5094	7.94192	-174.006	Beta	Beta	Alpha-R	140.413	3.50271	4.06627	HIS	ASP	4.06627	3.50271	3.73693	4.53427	5.2142	4.71575	4.70377	4.77901
1ACD	2.7	A	117	N/A	N/A	SHEET	-101.009	132.696	-179.502	-56.3587	-132.524	134.745	179.058	-129.272	114.477	-179.981	Beta	Beta	Beta	124.907	3.61053	4.03605	GLU	VAL	4.03605	3.61053	4.10772	4.83923	6.40264	6.62046	5.27515	5.78742
5Z3D	1.25	A	202	HELIX	HELIX	HELIX	-95.7726	117.254	-174.905	-163.3	-59.2087	-33.3102	179.104	-111.967	16.2978	-179.474	Beta	Alpha-R	N/A	112.295	3.4417	2.86694	THR	ALA	2.86694	3.4417	4.27242	4.51867	4.15079	3.2216	3.91965	2.97764
4R0V	2.29	A	88	SHEET	SHEET	SHEET	-95.5492	132.944	163.735	-51.8148	-124.777	146.573	173.582	-123.405	123.053	-168.589	Beta	Beta	Beta	117.305	3.71115	3.90475	VAL	VAL	3.90475	3.71115	4.12716	4.10537	6.19441	5.76483	4.97889	4.83513
3WEU	1.93	A	55	N/A	N/A	N/A	-94.4634	138.792	-175.638	-55.2074	-76.755	128.164	176.601	92.2066	17.1806	176.493	Beta	Beta	Alpha-L	115.542	3.57024	3.21755	GLY	ILE	3.21755	3.57024	3.56284	4.34987	4.8358	5.69604	4.4397	5.03879
1QFM	1.4	A	175	N/A	SHEET	N/A	-93.5655	163.052	178.695	-76.8202	-136.636	121.463	-178.39	-107.732	143.585	173.555	Beta	Beta	Beta	125.137	3.49913	4.04927	SER	MET	4.04927	3.49913	3.95125	3.30572	4.92952	5.70414	4.59564	4.84393
6B6L	2	A	110	SHEET	SHEET	N/A	-85.2222	134.741	-175.739	-58.8924	-117.951	130.995	-177.369	-88.5939	163.696	174.996	Beta	Beta	Beta	123.427	3.39431	3.82269	LYS	ILE	3.82269	3.39431	3.77801	4.51248	4.80508	5.77675	4.45545	5.10355
4FLM	2.41	A	60	N/A	HELIX	N/A	-84.2846	151.724	165.793	-65.5977	-98.1038	175.094	174.979	88.6869	-29.2991	-165.221	Beta	Beta	Alpha-L	93.233	3.23285	3.66552	THR	THR	3.66552	3.23285	4.46622	3.11261	5.3877	5.47269	5.03042	4.58059
2WL4	1.8	A	378	SHEET	SHEET	SHEET	-84.1963	160.393	-170.044	60.6343	-141.348	124.044	179.283	-139.02	150.374	166.984	Beta	Beta	Beta	127.808	3.43117	4.07037	LEU	ILE	4.07037	3.43117	3.79347	4.58101	3.57841	5.34574	2.93475	4.77107
4WZ0	1.95	A	37	N/A	N/A	HELIX	-83.5401	111.582	-166.753	-169.212	-40.9949	-36.5035	-173.28	-116.608	159.181	169.597	Beta	Alpha-R	Beta	116.101	3.56941	2.45947	THR	PRO	2.45947	3.56941	4.49915	4.23787	3.16837	3.44396	2.63512	3.38693
3NRA	2.15	A	325	N/A	N/A	HELIX	-82.0369	123.992	-170.369	-164.887	-53.0276	-41.9194	-172.688	-55.1151	-27.4457	172.296	Beta	Alpha-R	Alpha-R	108.103	3.36138	2.91263	GLY	GLU	2.91263	3.36138	4.58729	4.22591	3.25127	3.84241	3.1008	3.78055
5G5G	1.7	C	395	N/A	N/A	N/A	-77.1341	147.284	157.53	-56.0034	-62.6166	146.397	179.718	-93.4201	109.625	179.582	Beta	Beta	Beta	98.6555	3.26382	3.12589	ARG	PHE	3.12589	3.26382	4.43101	3.59141	5.63503	4.74774	4.9906	4.32251
4IEF	2.3	B	473	N/A	N/A	N/A	-73.9436	152.802	170.702	-44.5916	37.8758	11.2226	179.07	-166.559	153.593	176.699	Beta	Alpha-L	Beta	149.399	3.14212	3.08241	ALA	VAL	3.08241	3.14212	3.7075	4.40432	5.22635	5.52845	4.6801	4.88008
2OAN	2.61	A	272	N/A	HELIX	N/A	-73.1845	147.668	176.033	-83.9769	-60.0528	171.238	-178.859	-93.9837	163.937	175.899	Beta	Beta	Beta	74.5065	3.2806	2.97471	SER	GLY	2.97471	3.2806	3.64903	3.73325	4.72072	5.79363	4.37492	4.99167
7F8S	2.63	B	20	HELIX	HELIX	N/A	-70.2589	116.361	-179.564	-160.27	-71.505	-21.6849	-179.588	-98.9947	9.29246	-177.73	Beta	Alpha-R	Alpha-R	118.534	3.10544	3.12218	ASP	PRO	3.12218	3.10544	4.99828	4.40762	5.29723	3.30009	4.59157	2.95752
7NAY	1.84	A	55	N/A	N/A	N/A	-69.9846	148.094	-177.953	-167.748	-59.1327	-28.0495	-178.496	-100.128	3.83117	175.504	Beta	Alpha-R	Alpha-R	112.831	3.18036	2.97124	SER	ILE	2.97124	3.18036	4.75528	4.30816	3.15203	3.22542	3.32963	3.56453
3SGU	1.7	A	65	N/A	SHEET	HELIX	-67.7545	152.591	169.506	-54.5776	-54.6326	144.846	174.073	80.7638	-16.1851	-175.877	Beta	Beta	Alpha-L	109.8	3.03418	2.96009	GLY	ARG	2.96009	3.03418	4.25789	3.69662	5.58561	4.89551	4.97366	4.5208
4BPY	1.4	A	86	N/A	N/A	N/A	-66.8596	120.867	-176.456	-161.767	-84.6711	-1.70587	-173.476	-85.2417	-4.72866	172.922	Beta	Alpha-R	Alpha-R	128.854	3.08179	3.33061	HIS	PRO	3.33061	3.08179	4.97211	4.46658	5.1316	3.11647	4.43492	2.97741
4PIO	1.51	A	285	SHEET	N/A	SHEET	-66.3741	138.171	179.09	-69.6424	-113.155	143.78	-166.295	-134.141	92.3679	-178.747	Beta	Beta	Beta	114.897	3.05813	3.76892	SER	LYS	3.76892	3.05813	4.47559	3.6557	5.60463	4.68104	4.99631	4.31528
6ED0	1.44	A	125	HELIX	HELIX	HELIX	-65.7868	128.968	-175.284	-178.443	-64.1979	-29.1227	178.814	-107.823	-14.758	-174.033	Beta	Alpha-R	Alpha-R	112.01	2.96647	2.98351	ILE	PRO	2.98351	2.96647	4.37367	4.55579	3.70052	3.2426	3.65854	3.01593
2R3I	1.28	A	177	N/A	N/A	N/A	-61.0146	130.093	-177.187	-170.337	-82.4486	-33.2916	-172.172	89.4802	15.1661	175.366	Beta	Alpha-R	Alpha-L	108.674	2.90673	3.31449	GLY	LYS	3.31449	2.90673	4.46891	5.09057	4.2035	5.28904	4.06857	4.73987
3PSZ	2.2	A	40	N/A	SHEET	N/A	-59.0166	155.918	178.868	-77.1917	-132.106	128.618	175.078	65.1881	3.17571	169.495	Beta	Beta	Alpha-L	123.73	2.95857	4.02154	GLU	ARG	4.02154	2.95857	3.45382	4.32022	5.59062	4.97801	4.89983	4.83208
4ZGJ	2	E	104	N/A	N/A	N/A	-58.1983	126.422	179.817	-49.657	-139.943	160.167	170.348	-168.97	16.8871	-173.037	Beta	Beta	N/A	113.29	2.917	4.12641	SER	THR	4.12641	2.917	4.26396	3.58753	6.02644	5.21137	5.11463	4.64036
4G2O	2.25	X	195	N/A	N/A	N/A	-56.882	161.37	178.252	85.5829	-98.8132	-35.4338	-179.258	-74.8202	149.575	173.368	Beta	Alpha-R	Beta	108.347	3.24965	3.48561	PRO	HIS	3.48561	3.24965	4.51834	3.31705	4.18759	4.56348	3.95375	3.6317
3QYH	2	A	117	HELIX	HELIX	HELIX	-56.5882	132.907	-162.14	-50.91	-165.827	144.884	-175.965	-166.67	10.3582	-170.326	Beta	Beta	N/A	112.049	2.87975	4.24001	SER	TYR	4.24001	2.87975	4.59722	3.58676	6.18985	5.17389	5.39927	4.67002
6K5J	1.9	A	269	N/A	N/A	N/A	-53.1682	122.814	-174.883	178.78	-72.5933	-16.5646	177.288	-63.3266	164.289	-174.716	Beta	Alpha-R	Beta	123.806	2.84185	3.09306	ASP	LEU	3.09306	2.84185	4.96582	4.38903	4.92736	3.74747	4.3707	3.70802
6XKH	1.28	A	145	N/A	N/A	N/A	-49.6715	141.036	-173.989	-47.2428	91.8972	-13.6729	173.241	-83.8688	-15.1329	-179.483	Beta	Alpha-L	Alpha-R	140.369	2.79017	3.5011	SER	GLY	3.5011	2.79017	4.22564	2.55204	5.74603	5.41251	4.99656	4.33616
3HHT	1.16	A	121	HELIX	HELIX	HELIX	-47.9753	134.452	-165.887	-48.6011	-164.684	141.529	-170.856	-167.507	5.56936	-173.136	Beta	Beta	N/A	113.662	2.80208	4.24906	SER	TYR	4.24906	2.80208	3.44053	4.10807	4.91937	5.93623	4.48758	5.14987
3A8G	1.11	A	112	N/A	N/A	N/A	-172.791	-93.6741	-173.63	53.5468	-166.113	6.97794	-175.793	-86.3145	-13.734	-175.1	N/A	N/A	Alpha-R	129.175	4.33237	4.15514	LEU	ALA	4.15514	4.33237	4.53508	2.99289	4.20498	4.14202	4.58305	4.20474
3VYG	1.72	C	131	HELIX	HELIX	HELIX	-170.37	-94.4869	-172.314	58.6971	-166.427	16.676	-178.227	-79.1151	-18.0457	-179.9	N/A	N/A	Alpha-R	131.015	4.22023	4.07654	LEU	SER	4.07654	4.22023	2.99754	4.66146	4.12623	4.15856	4.18916	4.59935
3HHT	1.16	A	119	HELIX	HELIX	HELIX	-169.155	-93.066	-169.334	58.1466	-167.507	5.56936	-173.136	-81.7399	-14.8782	-176.847	N/A	N/A	Alpha-R	128.617	4.27402	4.17953	LEU	SER	4.17953	4.27402	2.96896	4.55395	4.06934	4.13538	4.15477	4.55009
4OB0	1.2	A	111	N/A	HELIX	N/A	-165.267	-94.4513	-171.108	57.1827	-165.592	8.03233	-173.979	-84.2381	-15.632	-178.073	N/A	N/A	Alpha-R	129.024	4.22767	4.15426	LEU	SER	4.15426	4.22767	4.49207	2.96916	4.08632	4.23912	4.51674	4.29399
4OB1	1.63	A	111	N/A	HELIX	N/A	-163.74	-93.2686	-171.22	57.4044	-166.119	7.17383	-176.258	-85.1368	-15.3324	-178.131	N/A	N/A	Alpha-R	128.179	4.23228	4.16316	LEU	SER	4.16316	4.23228	4.52866	2.99006	4.0309	4.20207	4.47703	4.28248
4ZGJ	2	G	102	N/A	N/A	N/A	-160.599	-94.5758	-171.988	39.1343	-166.841	14.5124	-172.96	-87.0587	-23.6143	177.733	N/A	N/A	Alpha-R	129.286	4.20407	4.24468	LEU	SER	4.24468	4.20407	2.85667	4.41396	4.22148	4.30741	4.2547	4.70261
3QYH	2	C	115	HELIX	HELIX	HELIX	-160.503	-86.2438	-170.525	57.3776	-169.867	3.24408	178.609	-87.781	-22.9946	177.698	N/A	N/A	Alpha-R	128.5	4.21722	4.23896	LEU	SER	4.23896	4.21722	4.75354	2.94951	4.28375	4.24999	4.68748	4.30262
6B6L	2	B	481	HELIX	HELIX	N/A	-134.218	50.3439	175.582	-147.595	-48.1695	-36.1421	-166.681	59.6451	44.337	-177.866	N/A	Alpha-R	Alpha-L	109.022	3.92348	2.86751	TYR	LEU	2.86751	3.92348	4.83724	4.44907	5.47097	5.91228	4.16541	4.81957
4YUF	1.54	A	121	HELIX	HELIX	HELIX	-9.9813	-53.7541	-163.377	96.6411	-109.403	23.5348	-179.671	52.9494	-138.636	154.269	N/A	Alpha-R	PPII-R	148.052	2.97748	3.71065	SER	LEU	3.71065	2.97748	2.92128	4.49612	4.66153	5.38367	4.13938	4.54835
5Z89	1.42	A	95	HELIX	HELIX	SHEET	40.7684	-119.322	-172.876	51.9584	-51.49	-147.203	144.646	-115.048	132.59	176.848	PPII-R	Beta	Beta	128.907	2.77958	2.78516	HIS	MET	2.78516	2.77958	4.40202	4.11501	4.53849	2.72896	4.79017	3.46678
5JQN	1.19	A	145	HELIX	HELIX	HELIX	47.1558	-118.855	-173.788	-172.524	-51.8059	-29.8784	175.888	-128.118	123.553	168.871	PPII-R	Alpha-R	Beta	117.525	2.76942	2.87172	VAL	TYR	2.87172	2.76942	4.77627	4.39519	2.85133	3.047	3.66034	3.10063
3KI8	1.6	A	146	HELIX	HELIX	HELIX	49.4503	-122.603	-179.183	-164.823	-52.048	-15.6377	168.408	-127.238	127.403	167.917	PPII-R	Alpha-R	Beta	126.897	2.8271	3.03455	ILE	PHE	3.03455	2.8271	4.71495	4.15869	2.79938	3.58798	3.56478	3.48642
6ISQ	1.86	A	105	HELIX	HELIX	SHEET	51.6366	-127.993	-178.545	-161.641	-49.7633	-31.4487	-179.789	-141.169	137.564	177.652	PPII-R	Alpha-R	Beta	119.034	2.80175	2.7948	VAL	GLN	2.7948	2.80175	4.31366	4.73917	3.2529	2.73801	3.35431	3.56883
1DIN	1.8	A	123	N/A	N/A	N/A	51.9806	-104.924	179.253	-61.2293	-57.1523	-40.6852	-178.97	-130.807	131.553	-179.508	PPII-R	Alpha-R	Beta	96.372	2.98048	2.78596	TYR	LEU	2.78596	2.98048	4.23665	4.57107	3.22851	3.7084	3.63237	3.56331
6FTQ	2.08	A	233	HELIX	HELIX	HELIX	57.6108	-123.764	-177.385	-163.885	-50.1253	-22.7909	171.485	-84.6451	119.597	162.17	PPII-R	Alpha-R	Beta	126.137	2.90989	3.02832	ILE	TYR	3.02832	2.90989	4.32415	4.7742	3.6075	2.7035	3.49456	3.48295
6MTG	1.85	A	142	HELIX	HELIX	SHEET	57.8141	-121.624	-178.716	-175.717	-54.4056	-33.06	-175.434	-116.073	129.283	164.24	PPII-R	Alpha-R	Beta	114.333	2.85103	2.76999	VAL	TRP	2.76999	2.85103	4.50173	5.18891	3.73608	3.66659	3.63729	4.34055
3A9C	2.6	A	133	N/A	N/A	N/A	60.371	-153.31	179.872	-160.142	-133.387	78.45	-178.079	-154.053	149.689	-179.844	PPII-R	Beta	Beta	147.341	2.9879	3.98331	HIS	HIS	3.98331	2.9879	4.42165	4.80593	3.62076	2.33616	3.8314	3.28962
4QYT	1.05	A	111	N/A	N/A	SHEET	63.1315	-129.403	178.518	-175.325	-70.7779	-35.7051	162.501	-127.751	145.251	174.642	PPII-R	Alpha-R	Beta	122.837	3.0585	3.05325	ILE	ALA	3.05325	3.0585	5.02742	4.68511	4.66126	2.78924	4.88738	3.57038
4P5P	1.54	A	132	N/A	HELIX	SHEET	65.1648	-130.632	177.579	-175.524	-72.3	-14.5501	176.106	-129.447	139.152	173.132	PPII-R	Alpha-R	Beta	123.324	2.94766	3.0939	ILE	HIS	3.0939	2.94766	4.92633	4.70427	4.51012	2.71552	4.76225	3.54391
1U9C	1.35	A	126	N/A	HELIX	SHEET	68.5252	-108.546	170.709	172.878	-86.2775	-8.86534	176.399	-126.931	139.525	169.033	PPII-R	Alpha-R	Beta	127.218	3.10837	3.49273	VAL	HIS	3.49273	3.10837	5.08672	4.85002	4.45031	2.86969	4.64057	3.6164
5SY9	1.1	A	106	N/A	N/A	SHEET	73.187	-106.218	169.615	176.654	-89.1023	-12.1448	179.75	-126.748	142.916	167.695	PPII-R	Alpha-R	Beta	122.749	3.22722	3.46858	ILE	ALA	3.46858	3.22722	4.97275	4.71201	4.64614	2.82171	4.68949	3.54497
4XLL	2.08	A	104	N/A	HELIX	SHEET	73.9685	-118.781	175.553	174.784	-68.1915	-35.0398	-166.828	-130.66	146.759	171.134	PPII-R	Alpha-R	Beta	110.583	3.19694	3.15363	ILE	ALA	3.15363	3.19694	4.91332	4.59619	4.40525	2.78334	4.57857	3.55189
3UK7	2.05	A	313	N/A	N/A	SHEET	74.7139	-112.602	178.273	-162.701	-86.9917	-10.2717	176.389	-126.942	135.758	164.451	PPII-R	Alpha-R	Beta	128.205	2.99799	3.37935	ILE	HIS	3.37935	2.99799	4.67199	5.01539	4.61361	3.45831	4.4351	4.02067
4Y1R	1.65	B	105	N/A	N/A	SHEET	75.5858	-109.956	171.727	-177.308	-83.1884	-9.2483	-176.941	-121.248	136.958	168.592	PPII-R	Alpha-R	Beta	124.409	3.16308	3.33986	ILE	HIS	3.33986	3.16308	4.90313	4.70004	4.63508	2.90001	4.70582	3.55825
