# Supplementary material for: Synthesis and conformational preferences of peptides and proteins with cysteine sulfonic acid
Source: Royal Society of Chemistry journal article supplement (doi:10.1039/d3ob00179b), 2023-01-01
Supplement: d3ob00179b4.xlsx [file d3ob00179b4.xlsx]

## Sheet: OCS
PDB ID	Resolution	Chain	Residue	Structure OCS	Structure NextRes	Structure PrevRes	Phi OCS	Psi OCS	Omega OCS	Chi1 OCS	Phi NextRes	Psi NextRes	Omega NextRes	Phi PrevRes	Psi PrevRes	Omega PrevRes	Region OCS	Region NextRes	Region PrevRes	<A C=O---C=O P	O---C=O distance Prev	O---C=O distance Next	PrevRes	NextRes	O--C distNext	O--Cdist Prev	dOD1-N	dOD2-N	dOD3-N	dOD1-N1	dOD2-N1	dOD3-N1	dOD1-CO	dOD2-CO	dOD3-CO
5UR0	1.94	A	149	HELIX	HELIX	HELIX	-56.5005	-42.7812	-179.948	42.0379	-64.9059	-41.9713	176.779	-94.5629	167.145	170.494	Alpha-R	Alpha-R	Beta	101.675	2.98299	3.02373	SER	THR	3.02373	2.98299	2.37022	3.51998	4.16463	3.58802	2.62346	4.70457	3.79008	3.15421	4.69194
1CS8	1.8	A	25	HELIX	HELIX	HELIX	-51.6962	-34.3733	179.809	49.2527	-59.7015	-34.5234	179.427	-102.83	17.9098	179.711	Alpha-R	Alpha-R	Alpha-R	108.718	2.81258	2.93147	SER	TRP	2.93147	2.81258	2.57367	3.87227	4.34603	3.47498	3.0976	4.99718	3.70849	3.36915	4.84685
5C7O	1.73	O	224	HELIX	HELIX	HELIX	-57.8825	-46.4965	-176.912	36.8559	-64.7452	-40.4806	179.684	-108.073	169.091	174.73	Alpha-R	Alpha-R	Beta	103.251	2.8952	2.96955	SER	THR	2.96955	2.8952	2.58809	37.3871	3.60466	3.89966	35.4276	2.97977	4.01364	36.6541	3.43082
5ACQ	1.7	A	221	HELIX	HELIX	SHEET	-86.2047	2.93412	172.933	-62.0513	-73.6497	-16.8289	176.756	53.5748	-143.298	-175.358	Alpha-R	Alpha-R	PPII-R	119.313	3.2602	3.25731	GLY	LEU	3.25731	3.2602	2.59216	4.1676	3.9415	5.01504	5.73609	5.54755	4.31198	4.81139	4.38976
2CV4	2.3	A	50	HELIX	HELIX	HELIX	-62.1745	-30.5324	171.629	-51.452	-68.1346	-43.4195	179.072	-54.4024	-50.6456	179.388	Alpha-R	Alpha-R	Alpha-R	98.2321	3.05893	2.92658	VAL	THR	2.92658	3.05893	2.64342	3.45645	4.38364	4.79453	5.33572	5.65437	4.42408	4.35981	5.02117
3QOR	1.75	D	188	N/A	N/A	N/A	-128.032	87.8378	173.917	55.715	-117.87	162.055	-177.629	-125.332	142.095	-179.043	Beta	Beta	Beta	104.837	3.96631	3.88497	PHE	VAL	3.88497	3.96631	4.07524	2.65489	4.12053	4.67413	4.64703	5.94956	3.38987	3.4286	4.64703
3UK1	2.15	A	177	HELIX	HELIX	HELIX	-57.1478	-44.8504	177.533	-54.0966	-67.3341	-23.3284	177.525	-52.1364	-50.4599	179.092	Alpha-R	Alpha-R	Alpha-R	118.25	2.97551	3.22112	GLY	LEU	3.22112	2.97551	3.69794	4.55302	2.66127	5.48835	5.7207	4.82099	4.58411	5.30189	4.43697
7KUU	2	B	45	HELIX	HELIX	HELIX	-60.5608	-44.8896	171.771	-55.2703	-47.9437	-51.2174	-174.056	-63.5247	-49.2364	-177.484	Alpha-R	Alpha-R	Alpha-R	97.2586	3.01928	2.86553	VAL	THR	2.86553	3.01928	2.68139	3.53313	4.41696	4.8114	5.28747	5.54871	4.4358	4.32888	5.02626
5O84	1.88	A	65	SHEET	HELIX	SHEET	-107.833	153.34	179.486	-67.038	86.5529	119.706	-166.821	-126.886	117.95	-177.496	Beta	N/A	Beta	66.8091	3.72047	3.48439	ILE	GLU	3.48439	3.72047	4.2588	13.3119	2.68181	5.51876	15.2561	5.40627	4.98067	14.9936	4.49781
3PVQ	2.1	A	203	HELIX	HELIX	HELIX	-64.3287	-46.1167	178.728	43.4225	-78.4871	-25.9433	178.128	-97.4837	-171.335	-174.001	Alpha-R	Alpha-R	Beta	114.715	2.96758	3.26549	ASP	SER	3.26549	2.96758	3.41476	2.69689	4.25645	2.87342	4.0571	4.86728	3.38428	4.1322	4.80103
2PT0	1.7	A	252	N/A	N/A	SHEET	-129.639	-151.215	-177.643	58.1394	-91.8169	-64.2827	-178.734	-149.566	154.816	178.83	Beta	Alpha-R	Beta	89.8071	3.96345	3.42883	HIS	GLU	3.42883	3.96345	4.29754	2.6984	4.13966	3.14399	3.65897	4.88757	3.59809	3.20937	4.76713
3H41	1.79	A	238	HELIX	HELIX	HELIX	-66.22	-38.1393	-179.01	31.3164	-79.8945	-30.1261	175.759	-90.8312	175.437	-167.665	Alpha-R	Alpha-R	Beta	113.168	2.83603	3.24782	ASP	SER	3.24782	2.83603	2.72342	4.22811	3.44231	4.23037	4.9479	3.06735	4.24406	4.73325	3.41802
3MC4	1.95	A	219	N/A	N/A	N/A	62.7031	7.79508	178.151	-58.7	-77.6633	157.137	179.904	-44.0154	138.222	174.072	Alpha-L	Beta	Beta	92.7351	3.17404	3.21974	GLN	SER	3.21974	3.17404	3.8683	2.72529	4.32953	5.69031	5.29584	6.15951	4.57752	4.55548	5.13348
3UBU	1.91	B	3	N/A	N/A	N/A	-131.458	154.316	167.982	-25.4836	-73.7737	139.649	177.603	-113.733	-29.8947	-174.904	Beta	Beta	N/A	109.046	3.9831	3.21093	PHE	CYS	3.21093	3.9831	4.36211	3.42184	2.72993	5.85885	5.66781	5.40446	5.06654	4.82814	4.24094
7BVV	2.12	A	62	HELIX	HELIX	HELIX	-59.4677	-46.0451	-173.661	-62.997	-69.7495	-39.9446	-173.503	-58.4088	-50.6984	177.912	Alpha-R	Alpha-R	Alpha-R	104.615	2.99548	3.10925	THR	THR	3.10925	2.99548	3.70934	2.73675	4.43189	5.40387	4.94849	5.56767	4.43451	4.46872	5.03527
1NHS	2	A	42	N/A	N/A	N/A	-59.6388	-25.7322	179.665	-43.2118	-92.4373	7.27138	-177.043	-59.0174	-28.7831	177.936	Alpha-R	Alpha-R	Alpha-R	136.775	3.07111	3.49977	CYS	GLY	3.49977	3.07111	2.82928	2.76321	4.26413	4.83849	5.12069	5.89405	4.55036	4.31289	5.13442
5OVQ	1.8	A	49	HELIX	HELIX	HELIX	-54.5629	-44.198	177.414	-61.3262	-61.0128	-46.6746	-179.453	-57.1276	-42.7897	178.999	Alpha-R	Alpha-R	Alpha-R	95.9767	2.95786	2.95884	VAL	THR	2.95884	2.95786	2.76834	4.38229	3.40354	5.00332	5.66274	5.31957	4.61995	5.12649	4.3813
1E6Y	1.6	F	6065	N/A	HELIX	N/A	-73.7509	163.663	-171.486	63.8311	-66.7945	-29.9357	-179.598	-95.4242	33.0388	178.458	Beta	Alpha-R	N/A	117.565	3.16333	3.06492	ALA	SER	3.06492	3.16333	2.77617	4.44453	3.90008	4.69036	5.08071	3.3955	3.61583	4.55148	2.91207
5Y2P	1.5	A	305	SHEET	SHEET	SHEET	-136.433	126.396	-170.824	-48.8525	-159.18	136.176	176.124	-139.632	148.155	179.287	Beta	Beta	Beta	120.033	4.08424	4.13934	GLN	PHE	4.13934	4.08424	3.63285	4.40033	2.78259	5.48348	6.1194	5.62581	4.76154	5.14735	4.48271
5VRB	1.85	A	154	HELIX	HELIX	HELIX	-56.8076	-44.0019	-175.666	-65.0719	-71.9885	-27.2406	177.495	-60.4768	-44.2938	177.461	Alpha-R	Alpha-R	Alpha-R	114.305	2.9183	3.12817	GLY	LEU	3.12817	2.9183	4.24678	3.99075	2.78433	5.42815	5.4766	5.0348	5.00265	4.54378	4.49651
5YHH	2	A	119	HELIX	HELIX	N/A	-145.966	164.133	-173.852	59.6498	-73.4004	-26.325	177.005	-72.2031	150.496	-167.254	Beta	Alpha-R	Beta	111.501	4.08422	3.19391	PRO	SER	3.19391	4.08422	3.8498	4.34318	2.78679	3.62709	5.14077	4.77549	3.09009	4.57884	3.71185
1MZS	2.1	A	112	HELIX	HELIX	HELIX	-66.3671	-12.5083	-179.663	-45.949	-95.941	1.35814	-179.883	47.1383	-139.395	-176.543	Alpha-R	Alpha-R	PPII-R	131.889	3.02809	3.4936	ALA	ALA	3.4936	3.02809	3.47871	2.79237	4.40783	5.56516	4.98566	5.93904	4.60726	4.56545	5.12679
6L4Y	1.5	A	222	N/A	HELIX	N/A	-64.0556	138.618	178.322	-60.0945	55.5387	30.4726	-171.732	-170.648	157.234	178.56	Beta	Alpha-L	Beta	117.221	3.01163	2.97407	ALA	GLU	2.97407	3.01163	3.40393	4.4533	2.80144	4.93896	5.88878	5.55317	4.35514	5.10604	4.44561
4FR7	1.61	A	196	HELIX	HELIX	SHEET	-79.6123	1.70617	171.721	-62.2201	-75.889	-95.0053	125.367	48.8826	-149.622	-168.108	Alpha-R	N/A	PPII-R	121.662	3.08719	3.25678	GLY	ALA	3.25678	3.08719	3.65925	94.2793	2.81044	5.42094	95.2197	5.25546	4.31002	95.5263	4.58866
1XIY	1.8	A	59	HELIX	HELIX	HELIX	-69.5317	-36.9812	-177.814	-63.7416	-81.703	-30.1352	-177.425	-58.8449	-41.2784	-178.483	Alpha-R	Alpha-R	Alpha-R	111.59	3.08084	3.37504	THR	SER	3.37504	3.08084	2.81347	3.58367	4.36609	5.01352	5.32953	5.58388	4.56263	4.34689	5.0025
4OW0	2.1	A	112	HELIX	HELIX	HELIX	-60.6486	-31.0717	178.265	48.5141	-66.3035	-37.6185	178.501	-88.3548	11.4355	178.922	Alpha-R	Alpha-R	Alpha-R	99.3705	2.87558	2.89057	ASN	TYR	2.89057	2.87558	4.32567	3.07534	2.8312	4.50111	2.52546	4.21803	4.36276	2.91702	4.19989
2P8E	1.82	A	242	HELIX	HELIX	SHEET	-95.1403	178.645	-175.828	68.9754	-62.0412	-20.9204	174.421	-157.821	162.199	179.125	Beta	Alpha-R	Beta	119.339	3.49397	3.04335	ALA	ASP	3.04335	3.49397	4.16134	2.83241	4.21747	3.20899	4.11293	4.87369	3.19399	3.27782	4.52782
2R47	1.88	A	36	HELIX	HELIX	N/A	-101.928	-21.7511	179.094	-63.7461	-47.3253	-47.4704	-178.65	-65.8648	-47.4174	-172.548	Alpha-R	Alpha-R	Alpha-R	104.18	3.5593	2.74234	VAL	THR	2.74234	3.5593	3.91099	4.39359	2.84079	5.61059	5.74669	5.16245	4.51723	5.00872	4.50982
1J98	1.2	A	84	N/A	N/A	N/A	-80.3301	-0.116797	171.171	52.903	71.3612	19.2876	-176.835	-62.4319	-24.5491	178.634	Alpha-R	Alpha-L	Alpha-R	125.273	3.33637	3.17313	GLY	GLN	3.17313	3.33637	4.4355	2.84459	3.35212	5.23162	4.48678	3.18785	4.47973	4.09578	2.89902
5IMV	1.05	A	48	HELIX	HELIX	HELIX	-70.6245	-33.9931	175.558	-59.3155	-69.0518	-45.1546	178.486	-66.7065	-39.5534	-177.312	Alpha-R	Alpha-R	Alpha-R	98.2382	3.09172	3.07139	GLY	THR	3.07139	3.09172	2.8446	65.2267	3.18051	5.10369	66.5116	5.32415	4.64592	65.1948	4.35703
1KCZ	1.9	A	361	N/A	N/A	N/A	-67.1446	-13.2185	-177.37	55.2835	-100.115	20.339	173.674	-134.094	149.312	171.89	Alpha-R	Alpha-R	Beta	145.451	3.03507	3.64054	THR	ASN	3.64054	3.03507	2.85964	3.50152	4.4665	4.11772	3.02383	5.02167	3.99635	3.0068	4.51138
6LTQ	1.85	A	156	HELIX	HELIX	HELIX	-60.4723	-51.5249	179.312	-59.6447	-63.8422	-35.0117	-177.594	-65.3417	-36.2628	-179.772	Alpha-R	Alpha-R	Alpha-R	106.839	2.90303	2.9231	ILE	ASN	2.9231	2.90303	3.7333	2.86549	4.46462	5.46033	4.95299	5.54894	4.58225	4.56745	5.12651
5T73	2.6	A	151	HELIX	HELIX	HELIX	-67.456	-20.1521	176.566	64.4781	-84.1258	-42.0028	178.193	-108.307	170.154	-176.374	Alpha-R	Alpha-R	Beta	101.045	3.0228	3.02033	SER	THR	3.02033	3.0228	4.03011	4.33636	2.87128	3.09863	4.8824	3.42787	3.07001	4.5603	3.6063
4HPE	2.38	A	242	HELIX	HELIX	HELIX	-58.1672	-52.0004	-177.267	41.992	-76.3129	-22.3028	174.573	-102.107	179.19	-174.702	Alpha-R	Alpha-R	Beta	115.52	2.88592	3.25883	ASP	SER	3.25883	2.88592	3.92724	4.26548	2.87612	4.89005	3.60122	2.97686	4.87201	3.85741	3.49699
1E6Y	1.6	C	3065	N/A	HELIX	HELIX	-131.492	164.953	-169.972	61.9268	-63.6813	-32.5092	-178.123	-89.3002	94.7441	166.026	Beta	Alpha-R	Beta	114.171	4.10281	2.98518	ALA	SER	2.98518	4.10281	2.87672	4.52044	3.79619	4.81185	5.00716	3.39806	3.76993	4.53791	2.88635
3ZJG	1.92	B	103	HELIX	HELIX	HELIX	-73.6912	-19.479	171.863	47.2747	-58.0917	-47.2759	-175.637	-100.612	21.8408	-171.34	Alpha-R	Alpha-R	Alpha-R	93.483	3.0912	2.78361	ASN	LEU	2.78361	3.0912	2.88313	4.43855	3.46966	4.38565	5.12155	3.18373	4.23279	4.67103	3.24315
3EF2	1.8	A	215	HELIX	HELIX	HELIX	-47.3381	-53.1544	-175.279	-48.864	-59.517	-39.9131	-179.097	-114.026	-156.967	-171.116	Alpha-R	Alpha-R	Beta	106.526	2.77651	2.93307	ASP	ASP	2.93307	2.77651	3.33427	4.42025	2.88631	5.29685	5.52982	4.84419	4.50788	5.15953	4.62826
3EIR	2.1	A	156	HELIX	HELIX	HELIX	-59.5345	-38.762	178.258	62.4161	-64.6902	-38.9048	-174.596	-61.4321	163.905	-172.96	Alpha-R	Alpha-R	Beta	104.922	2.90705	2.99472	VAL	GLY	2.99472	2.90705	4.22198	4.26184	2.89046	3.20729	4.74989	3.15677	3.38032	4.64574	3.526
3KOM	1.6	A	159	HELIX	HELIX	HELIX	-56.7847	-43.0727	-177.284	-58.5233	-69.2761	-28.251	177.806	-58.821	-43.9036	176.791	Alpha-R	Alpha-R	Alpha-R	114.094	2.87709	3.07869	GLY	LEU	3.07869	2.87709	3.7001	4.45826	2.89224	5.48393	5.57718	5.00031	4.56191	5.07331	4.58589
6SQX	1.4	A	324	HELIX	HELIX	HELIX	-54.9516	-56.7132	-176.552	38.4234	-77.268	-33.3523	178.991	-99.0892	-172.616	-172.278	Alpha-R	Alpha-R	Beta	107.841	2.79292	3.1457	ASP	SER	3.1457	2.79292	2.89256	3.22415	4.38208	4.31861	2.69185	4.50029	4.39346	3.37855	4.68035
5XBR	2.1	A	46	HELIX	HELIX	HELIX	-57.7493	-43.329	175.664	-60.6896	-56.2552	-50.1581	173.235	-66.6983	-42.1565	178.757	Alpha-R	Alpha-R	Alpha-R	97.7672	2.87802	2.95357	VAL	THR	2.95357	2.87802	2.90969	3.41497	4.38553	5.17259	5.25926	5.7019	4.70908	4.274	5.08777
3PVQ	2.1	A	291	N/A	N/A	N/A	-91.5046	16.5365	175.55	46.1849	-51.5932	128.924	176.987	-64.2543	-28.5907	-177.949	Alpha-R	Beta	Alpha-R	102.132	3.44181	2.80777	GLU	TYR	2.80777	3.44181	2.91319	3.59025	4.40053	4.51621	3.79427	5.6414	4.09451	3.11551	4.70659
3Q3X	1.9	A	147	N/A	N/A	N/A	-60.7841	139.02	-177.568	-58.4801	89.0137	-6.08289	177.027	-94.2941	0.712345	-177.299	Beta	Alpha-L	Alpha-R	139.661	2.92041	3.48585	GLN	GLY	3.48585	2.92041	3.56958	4.50277	2.92043	4.89963	5.71807	5.54706	4.47723	5.09276	4.58685
4RNA	1.79	A	98	SHEET	N/A	SHEET	-117.631	113.502	178.799	-40.5638	52.6817	40.4763	176.181	-132.664	124.516	-178.086	Beta	Alpha-L	Beta	104.833	3.83456	2.82178	VAL	ASP	2.82178	3.83456	2.92093	4.5956	3.99446	5.58679	6.1705	6.36412	4.64762	5.35949	5.18195
4D1W	1.4	A	221	HELIX	HELIX	SHEET	-80.3445	-1.91456	165.943	-72.4136	-65.5596	-15.7681	-178.208	57.4345	-155.824	-171.043	Alpha-R	Alpha-R	PPII-R	126.626	3.13912	3.19633	GLY	ALA	3.19633	3.13912	2.9225	4.61648	3.56329	5.19151	6.06673	5.28211	4.3807	4.94748	4.15429
3R0V	1.38	A	51	SHEET	SHEET	SHEET	-109.759	144.414	-175.885	-75.2543	-148.332	158.933	178.71	-112.348	122.49	170.482	Beta	Beta	Beta	115.857	3.80248	4.07593	ILE	TYR	4.07593	3.80248	3.65172	4.65886	2.92369	5.0276	5.95762	5.61321	4.53534	5.24839	4.60388
1OEO	2.15	X	215	SHEET	N/A	SHEET	-129.066	-132.63	179.047	40.4836	-70.268	-50.237	-173.699	-146.993	155.183	153.409	Beta	Alpha-R	Beta	93.9901	4.03226	2.92603	HIS	SER	2.92603	4.03226	4.39649	3.16622	2.94089	4.48573	3.02739	4.74368	4.57987	3.08299	4.21927
6OFU	1.75	A	234	HELIX	HELIX	HELIX	-60.5328	-41.2577	-179.524	-60.4287	-64.9342	-45.6458	178.255	-67.8663	-39.4564	177.645	Alpha-R	Alpha-R	Alpha-R	97.7481	2.88498	2.98716	LEU	GLN	2.98716	2.88498	3.67608	2.95552	4.4426	5.54964	5.03702	5.61371	4.56525	4.60449	5.02496
2GUG	2.28	A	354	HELIX	HELIX	HELIX	-54.8839	-47.864	-176.121	-78.3926	-60.4361	-42.6212	-171.667	-54.8471	-55.2757	175.061	Alpha-R	Alpha-R	Alpha-R	99.5929	2.8871	2.83428	GLU	PHE	2.83428	2.8871	4.50592	3.92452	2.95857	5.79936	5.31794	5.26097	5.17095	4.26148	4.55904
7KUU	2	A	44	HELIX	HELIX	HELIX	-62.2894	-39.7304	174.731	-62.3653	-54.2424	-49.9256	-174.649	-62.0713	-45.7874	-177.414	Alpha-R	Alpha-R	Alpha-R	93.696	3.01674	2.84518	VAL	THR	2.84518	3.01674	3.48783	2.96346	4.549	5.29752	5.02188	5.68737	4.29969	4.58827	5.02068
4YPT	2.6	A	1716	N/A	HELIX	HELIX	-71.2865	-24.132	173.81	34.1546	-64.9619	-31.0664	175.105	-94.7171	7.7739	-171.69	Alpha-R	Alpha-R	Alpha-R	108.835	2.99203	2.97355	ASN	TYR	2.97355	2.99203	2.96464	4.43192	3.25865	4.67679	5.09438	3.29457	4.4244	4.68322	3.44005
2HL9	1.9	A	580	HELIX	HELIX	HELIX	-30.5058	-58.405	174.113	52.6382	-47.4237	-48.0383	179.526	-91.8196	-1.81393	167.214	Alpha-R	Alpha-R	Alpha-R	97.2288	2.90336	2.81779	ASP	GLY	2.81779	2.90336	2.97084	4.55004	3.73807	4.60537	5.29398	3.51299	4.46194	4.98189	3.75968
3DEK	2.4	A	163	N/A	N/A	N/A	-66.9417	154.63	177.209	-49.6423	-125.955	25.665	-167.209	-172.335	156.931	-179.096	Beta	N/A	Beta	145.326	3.04039	3.973	ALA	ARG	3.973	3.04039	4.35876	3.3343	2.97161	5.62419	4.93141	5.63337	5.08087	4.43881	4.64303
7A5W	1.4	A	287	HELIX	HELIX	HELIX	-60.2515	-40.0241	174.879	-88.2911	-64.2508	-48.2847	-177.641	-62.181	-45.6042	176.052	Alpha-R	Alpha-R	Alpha-R	95.6617	3.02786	2.98865	THR	VAL	2.98865	3.02786	2.98126	4.50272	4.27935	5.25785	5.77121	5.34199	4.37672	5.01148	4.16536
6G4R	2.62	B	22	HELIX	HELIX	HELIX	-85.123	-17.382	173.897	-72.4864	65.8745	-9.4906	175.193	-85.5871	-43.7474	-177.325	Alpha-R	Alpha-L	Alpha-R	148.158	3.3515	3.15905	GLU	LYS	3.15905	3.3515	4.45152	4.06669	2.98356	5.9608	5.65633	5.31453	5.14394	4.53334	4.62602
7DTN	1.85	A	158	HELIX	HELIX	SHEET	-82.9376	-5.03348	172.295	-69.9035	-67.8223	-37.0033	-179.672	55.1704	-139.929	-178.192	Alpha-R	Alpha-R	PPII-R	106.574	3.35979	3.19225	GLY	PHE	3.19225	3.35979	2.9882	4.45607	3.40483	5.4162	6.01785	5.18407	4.73123	4.94189	4.07128
3RH0	1.72	A	8	SHEET	N/A	SHEET	-146.262	-159.4	-176.83	70.4301	-73.339	-61.3515	-170.617	-132.237	138.418	161.33	Beta	Alpha-R	Beta	86.9485	4.15673	3.14496	VAL	VAL	3.14496	4.15673	2.99571	4.43204	4.26986	3.48983	3.00707	4.68386	3.09312	3.49776	4.59228
6BLN	1.3	A	481	HELIX	HELIX	N/A	-75.6872	151.968	-171.506	73.0553	-65.2656	-35.7305	-178.408	71.3556	-160.04	-173.086	Beta	Alpha-R	PPII-R	108.781	3.07139	3.00428	GLY	LEU	3.00428	3.07139	4.11275	4.47941	2.99878	3.5069	5.1323	4.62536	3.01343	4.5369	3.53134
2CIO	1.5	A	25	N/A	HELIX	N/A	-44.2145	-41.4841	-177.516	37.3616	-58.3916	-38.6664	177.5	-104.275	13.49	176.924	Alpha-R	Alpha-R	Alpha-R	107.34	2.77889	2.89791	SER	TRP	2.89791	2.77889	3.01291	3.00153	4.31839	2.75114	4.51092	4.44868	3.27478	4.45423	4.4436
5NAH	1.75	A	168	N/A	N/A	N/A	-55.7235	-32.7229	-179.886	78.3113	-108.742	38.2678	-179.705	78.569	-176.394	-173.37	Alpha-R	N/A	PPII-R	156.274	2.96112	3.80316	GLY	ASN	3.80316	2.96112	4.47447	3.0304	4.06574	4.97235	3.53622	3.23265	4.55634	3.67979	3.07119
3GZS	2.09	A	364	HELIX	HELIX	HELIX	-62.8991	-45.3787	179.354	-72.3613	-69.0053	-27.6502	174.899	-57.4581	-40.6361	179.116	Alpha-R	Alpha-R	Alpha-R	113.488	2.99366	3.07345	VAL	PHE	3.07345	2.99366	3.95355	3.03113	4.50973	5.51443	5.30469	5.74956	4.47869	4.67732	5.15249
3C4B	1.68	A	1684	N/A	HELIX	N/A	-74.9944	179.266	-168.382	55.4014	-78.8046	-4.61937	-169.896	-59.9037	160.831	164.701	Beta	Alpha-R	Beta	132.162	3.25812	3.29736	ASP	TYR	3.29736	3.25812	4.52076	3.58777	3.0319	4.66707	3.30359	4.86092	4.49978	2.91826	4.04648
3OMD	1.5	A	43	HELIX	HELIX	N/A	-74.3231	175.274	-174.596	79.8343	-52.9933	-32.3554	179.997	67.7886	29.921	165.495	Beta	Alpha-R	Alpha-L	111.461	3.19435	2.80356	ASN	PRO	2.80356	3.19435	3.04841	4.25509	4.38655	4.01933	2.98909	4.86151	3.1997	3.06232	4.50834
3L3S	2.32	A	149	HELIX	HELIX	N/A	-84.9645	65.8942	179.963	-83.3818	-62.2701	-59.0265	178.578	-158.931	141.173	-179.516	Beta	Alpha-R	Beta	89.8497	3.36789	3.00061	PHE	THR	3.00061	3.36789	4.17509	4.46319	3.04939	6.06235	5.50357	5.15895	4.91307	4.60531	4.38708
4FDY	2.23	A	246	HELIX	HELIX	HELIX	-48.1608	-50.6058	-177.956	40.3598	-78.5385	-24.6858	176.954	-104.052	167.585	-174.176	Alpha-R	Alpha-R	Beta	116.728	2.84927	3.33042	ASP	SER	3.33042	2.84927	3.70253	4.43695	3.05366	4.82081	3.91498	2.65031	4.79244	4.06428	3.22558
6OP7	1.37	A	198	HELIX	HELIX	SHEET	-86.3546	7.5957	172.598	-65.6485	-75.1689	-12.3706	-178.787	53.0844	-144.917	-172.343	Alpha-R	Alpha-R	PPII-R	123.459	3.12078	3.2349	GLY	ALA	3.2349	3.12078	3.06609	3.45304	4.51682	5.4597	5.4735	6.22691	4.6925	4.38446	5.04803
2PN0	1.7	A	73	SHEET	SHEET	SHEET	-124.867	148.775	164.383	-70.6855	-133.831	136.297	175.02	-151.835	167.918	-177.704	Beta	Beta	Beta	121.906	3.91399	4.11902	PHE	LEU	4.11902	3.91399	4.51175	3.07062	3.90933	5.57018	5.5663	4.81861	5.04467	4.71356	4.52659
3ZBG	1.85	A	123	HELIX	HELIX	HELIX	-73.4195	-2.3399	172.826	7.60659	-94.1149	7.75078	-177.507	54.8113	-137.632	-173.117	Alpha-R	Alpha-R	PPII-R	137.25	3.15737	3.54242	ALA	ALA	3.54242	3.15737	4.64206	3.08364	3.09044	6.13333	4.09684	5.27886	5.23925	3.52206	4.80904
1YMD	1.7	A	473	N/A	N/A	SHEET	-133.376	-148.064	-178.439	49.6518	-72.437	-46.415	-179.044	-158.362	163.387	174.519	Beta	Alpha-R	Beta	96.3161	4.05153	3.13196	HIS	GLU	3.13196	4.05153	4.51746	3.55184	3.08917	4.41898	3.10788	4.69879	4.62961	3.23516	4.2709
6O4D	1.88	B	302	N/A	N/A	N/A	-62.4956	-30.8367	-179.236	-72.2666	-94.0876	9.00481	177.086	-89.6347	152.987	169.377	Alpha-R	Alpha-R	Beta	141.088	2.9932	3.55311	ARG	THR	3.55311	2.9932	3.79574	3.12538	4.59304	5.49685	5.32425	5.91589	4.43028	4.73033	5.15125
4O5A	1.78	A	223	SHEET	SHEET	SHEET	-137.415	155.974	174.651	73.5164	-131.237	142.689	178.085	-136.232	154.386	174.878	Beta	Beta	Beta	118.446	4.02968	4.04742	ARG	LEU	4.04742	4.02968	4.05393	3.12701	4.63842	3.39617	4.78975	4.94093	2.90933	3.71872	4.44127
5XU2	0.97	A	157	HELIX	HELIX	HELIX	-59.9196	-40.576	-178.238	-65.07	-72.2381	-19.4281	174.135	-60.9749	-39.6402	176.708	Alpha-R	Alpha-R	Alpha-R	120.476	2.88553	3.2216	GLY	LEU	3.2216	2.88553	4.21785	3.13618	4.25614	5.51917	5.31764	5.56753	4.53078	4.4841	5.05935
1W7V	2	A	249	N/A	N/A	N/A	-95.3105	147.808	169.561	-84.9223	-68.8207	132.266	-179.44	-108.49	-2.39581	-174.312	Beta	Beta	Alpha-R	108.697	3.47862	3.1753	GLU	GLU	3.1753	3.47862	4.94363	3.13629	4.08453	5.4732	5.29763	4.45893	5.13432	4.57443	4.39212
6V3Q	2.4	A	161	HELIX	HELIX	SHEET	-75.6618	-6.44124	176.99	-85.9222	-67.7453	-29.4944	177.597	65.7151	-149.653	179.404	Alpha-R	Alpha-R	PPII-R	111.354	3.21728	3.06521	GLY	LEU	3.06521	3.21728	3.1671	4.62149	3.68046	5.43036	5.98148	5.15063	4.63473	4.89378	3.97411
3IU6	1.79	A	767	HELIX	HELIX	N/A	-78.4949	119.567	-178.163	-169.662	-57.037	-37.5682	-173.223	-83.2888	129.299	179.629	Beta	Alpha-R	Beta	106.308	3.23634	2.85839	ARG	TYR	2.85839	3.23634	4.64591	4.04367	3.1788	5.91091	4.89463	5.56776	5.09396	4.45925	4.67254
1Z70	1.15	X	1336	N/A	N/A	N/A	-74.4631	148.892	175.904	-80.4841	-148.546	145.911	179.506	-84.5207	-17.6987	-168.276	Beta	Beta	Alpha-R	115.446	2.98718	4.08463	MET	HIS	4.08463	2.98718	4.43659	4.03302	3.18006	5.12183	4.59571	5.32332	4.7414	4.4789	4.62623
3I14	1.55	A	168	HELIX	HELIX	SHEET	-85.6605	-3.79064	166.295	-61.6795	-60.3	-28.7389	-173.852	62.0935	-155.214	-168.992	Alpha-R	Alpha-R	PPII-R	119.282	2.97493	3.15795	GLY	LEU	3.15795	2.97493	4.66701	4.01614	3.18529	6.07057	5.50664	5.43459	5.0369	4.31091	4.62194
5I4M	1.8	A	214	N/A	N/A	HELIX	56.144	46.124	175.894	-80.1656	-113.121	131.138	-175.689	-102.616	9.4716	179.282	Alpha-L	Beta	Alpha-R	124.19	2.88046	3.7976	GLU	LYS	3.7976	2.88046	3.18714	4.58352	3.67981	5.6766	6.20899	5.09062	4.77781	4.9848	4.13941
1HAV	2	B	172	N/A	N/A	N/A	-48.1133	137.351	-179.6	-51.6362	98.7695	-9.16565	179.15	-70.3086	-20.8166	-178.243	Beta	Alpha-L	Alpha-R	137.662	2.84799	3.57804	MET	GLY	3.57804	2.84799	3.25751	4.47941	3.19168	4.88658	5.90719	5.9007	4.34372	5.18719	4.86847
2VOA	1.7	A	167	N/A	N/A	N/A	-90.2187	-8.35049	-179.564	-71.5881	-130.569	-0.673413	-176.958	-59.9713	-23.5565	-178.412	Alpha-R	N/A	Alpha-R	129.095	3.44825	4.03281	VAL	PHE	4.03281	3.44825	3.73319	3.20589	4.58774	5.73868	5.35211	5.97813	5.00252	4.40705	4.84543
6DDA	3.2	A	465	N/A	N/A	N/A	-64.9536	10.3267	-176.773	-66.8259	-133.934	6.34065	179.095	-91.7249	173.355	-172.348	Alpha-R	N/A	Beta	130.67	3.04098	4.006	PHE	ASN	4.006	3.04098	3.50687	3.21491	4.58391	5.42516	5.52288	6.18407	4.41803	4.78261	5.06735
4LGT	1.3	A	114	SHEET	SHEET	N/A	-91.1843	157.553	165.83	-71.5325	135.334	-171.759	-169.273	-107.69	132.058	178.783	Beta	N/A	Beta	109.899	3.58237	3.94783	THR	GLY	3.94783	3.58237	4.23903	4.65222	3.25192	4.97943	5.62454	5.57824	4.75379	5.16752	4.79142
2WFI	0.75	A	63	N/A	N/A	N/A	-73.7459	161.176	-176.357	-87.0635	-110.079	156.216	159.9	75.7589	1.53844	177.693	Beta	Beta	Alpha-L	110.86	3.13736	3.72249	SER	LEU	3.72249	3.13736	4.79881	3.26008	4.10048	5.16329	5.1252	3.94628	5.02112	4.56276	4.05372
7NAY	1.84	A	281	SHEET	N/A	SHEET	-149.146	-173.332	-175.518	61.1401	-54.1224	-28.5246	-179.618	-115.39	132.861	-179.362	Beta	Alpha-R	Beta	119.321	4.18443	2.89664	VAL	ALA	2.89664	4.18443	3.28394	3.32216	4.61209	5.0186	3.29948	4.37375	4.35487	2.89593	4.39708
1O1X	1.9	A	65	SHEET	N/A	SHEET	-138.914	-173.579	-176.194	70.313	-47.2965	-52.4823	-177.333	-136.702	133.55	162.432	Beta	Alpha-R	Beta	98.6503	4.15273	2.76627	LEU	GLY	2.76627	4.15273	4.03856	4.54686	3.31456	3.02569	4.61642	4.56663	3.1002	4.54709	3.94743
4UUP	1.54	A	250	HELIX	HELIX	HELIX	-60.0025	-45.8914	179.843	-72.0988	-58.03	-51.4718	-176.708	-64.1857	-45.3147	179.206	Alpha-R	Alpha-R	Alpha-R	94.5104	2.97786	2.88954	LEU	HIS	2.88954	2.97786	4.18435	4.69126	3.36744	5.29789	5.64568	5.39948	4.27508	5.08938	4.70218
6SNU	2	A	263	N/A	N/A	N/A	-71.6045	-21.8207	-170.646	-73.3026	-67.3027	150.483	176.32	-89.1866	-50.4502	-167.593	Alpha-R	Beta	Alpha-R	90.4857	3.01076	3.05617	ILE	GLY	3.05617	3.01076	3.53699	4.67031	3.43951	5.55288	5.94597	5.32741	4.93535	4.96973	4.27439
1Z70	1.15	X	1341	N/A	N/A	N/A	-151.007	86.0416	-173.424	-94.7187	-90.5486	60.8191	-170.47	-139.719	-23.5077	-173.348	Beta	Beta	N/A	169.541	4.13214	3.45649	TYR	TYR	3.45649	4.13214	4.69451	4.4558	3.47515	6.21537	5.1387	5.47184	5.12272	4.42817	4.66174
7KLB	2.16	A	196	HELIX	N/A	HELIX	-105.937	46.5281	175.153	-91.3622	-134.851	113.228	-174.031	-59.7306	-39.0814	-179.576	N/A	Beta	Alpha-R	132.006	3.66891	4.03569	ALA	LYS	4.03569	3.66891	3.52654	4.77253	3.93066	5.06122	5.90876	6.0978	4.20541	4.70778	5.036
4RPA	2.1	A	110	SHEET	SHEET	N/A	-82.3891	124.097	173.932	-93.3539	-131.265	120.292	179.44	-161.479	168.513	169.963	Beta	Beta	Beta	129.139	3.33248	4.00512	LEU	TYR	4.00512	3.33248	4.1022	5.00821	3.53852	4.58726	5.62628	5.55801	4.27185	4.98549	4.68845
6V3U	2	A	200	N/A	N/A	N/A	-74.9513	136.265	-179.188	-122.192	-121.253	160.483	-178.351	-89.4636	-173.822	-173.582	Beta	Beta	Beta	108.583	3.11705	3.86245	GLY	MSE	3.86245	3.11705	4.72669	4.472	3.61573	5.38089	3.56101	4.48878	4.92973	3.67281	4.20486
3KY7	2.35	A	86	N/A	N/A	SHEET	-139.364	150.751	174.134	-100.552	-73.6397	-43.5975	-177.297	-82.1649	118.912	-174.362	Beta	Alpha-R	Beta	96.3717	4.12457	3.01851	MET	PRO	3.01851	4.12457	3.82728	4.72642	3.68794	5.44125	4.51015	4.65056	4.67641	4.30637	4.28068
3SHO	1.8	A	132	HELIX	HELIX	HELIX	-70.2696	-30.4145	-177.675	-122.955	-80.2096	-22.0833	-178.817	-63.1374	-43.2878	-177.595	Alpha-R	Alpha-R	Alpha-R	114.841	3.11169	3.28879	ILE	ARG	3.28879	3.11169	3.75727	4.80293	4.32841	5.57565	5.87421	4.84823	4.5199	5.06562	3.69205
2HHF	1.8	B	608	N/A	N/A	HELIX	-172.269	40.1646	-179.159	-147.507	-71.7879	153.254	-179.506	-153.313	68.4421	4.43389	N/A	Beta	Beta	94.1143	4.31369	3.63527	LEU	LEU	3.63527	4.31369	4.9625	4.55561	4.10749	6.11184	4.90408	5.42715	4.75878	3.56178	4.36636
4OH1	2	A	45	HELIX	HELIX	SHEET	-113.089	161.348	164.749	-168.727	-54.2007	-35.6617	176.71	-104.452	141.374	-170.629	Beta	Alpha-R	Beta	111.736	3.69352	3.09217	ILE	GLY	3.09217	3.69352	4.46566	4.85614	4.11352	2.63695	4.52943	3.14397	2.97589	4.5093	3.44787
7F8R	2.51	A	24	HELIX	HELIX	N/A	-175.197	103.063	178.319	-149.132	-70.7098	-21.8931	178.605	-67.5122	123.216	179.943	Beta	Alpha-R	Beta	117.008	4.31391	3.0998	ASN	PRO	3.0998	4.31391	4.48392	4.12654	4.94978	3.43551	4.68129	5.32171	3.09068	4.13746	4.46943
4G6Z	2.05	A	100	SHEET	N/A	SHEET	-114.669	139.168	-174.067	156.166	-122.723	13.0874	172.725	-75.3418	137.8	175.411	Beta	N/A	Beta	137.529	3.75347	3.93668	PRO	TYR	3.93668	3.75347	4.40986	4.13902	4.89914	3.08538	2.83489	4.6629	3.27055	2.52012	4.26395
1LME	2.2	A	87	N/A	N/A	N/A	-169.555	126.998	-179.667	-166.947	-54.2266	-24.2777	-179.451	-112.022	-166.492	-178.83	Beta	Alpha-R	Beta	118.427	4.19747	2.81642	GLY	LEU	2.81642	4.19747	4.52326	5.14459	4.15207	3.91768	4.90539	2.76686	3.89859	4.47067	2.59941
5K6A	1.7	C	59	SHEET	SHEET	SHEET	-149.75	118.583	177.202	-166.663	-87.0593	130.85	167.442	-107.823	158.532	179.037	Beta	Beta	Beta	123.707	4.15762	3.38625	VAL	GLN	3.38625	4.15762	4.44377	4.25212	5.0857	3.07678	3.75533	5.16748	2.89887	3.74656	4.66104
6H45	2.4	A	23	N/A	N/A	SHEET	-68.6507	141.392	-177.801	155.421	-68.542	-27.79	-176.112	-134.789	134.02	177.762	Beta	Alpha-R	Beta	113.987	3.17398	3.08158	GLU	SER	3.08158	3.17398	5.08475	4.27766	4.37048	4.32751	2.94618	4.79598	4.45158	3.43266	4.71898
2GPC	1.9	A	83	N/A	N/A	N/A	-162.655	135.61	177.439	-156.612	-58.768	-26.9083	178.08	-124.664	154.281	-176.898	Beta	Alpha-R	Beta	115.484	4.23397	2.93552	MET	PRO	2.93552	4.23397	4.73236	5.00908	4.28056	3.30038	5.14275	4.01233	3.36201	4.72541	3.95533
5AG2	1.77	A	128	SHEET	N/A	SHEET	-93.38	118.341	-175.706	-173.41	-75.0325	-32.6847	-178.628	-119.491	121.971	179.441	Beta	Alpha-R	Beta	110.804	3.51517	3.23146	TYR	LYS	3.23146	3.51517	4.69082	5.03697	4.29421	3.70682	5.30716	3.38417	3.26343	4.72841	3.36442
4U86	1.6	A	113	HELIX	HELIX	N/A	-161.774	145.079	-176.298	-170.063	-64.5599	-19.4284	172.665	-77.8932	55.048	-173.25	Beta	Alpha-R	N/A	121.081	4.16866	3.01704	ASP	SER	3.01704	4.16866	5.04635	4.62014	4.29654	5.06926	3.0973	3.62588	4.79188	3.25107	3.77822
3ELK	1.7	A	90	HELIX	HELIX	HELIX	-60.1953	-46.1841	-176.738	-167.653	-63.7615	-38.5019	-169.094	-59.333	-47.5183	-179.35	Alpha-R	Alpha-R	Alpha-R	111.875	2.97239	2.93336	LEU	ASP	2.93336	2.97239	4.30191	5.0469	4.35078	4.87475	5.06254	3.49526	3.78463	4.4705	2.74088
3O5A	1.72	A	784	N/A	N/A	N/A	-58.6575	128.772	-174.518	-175.01	-70.4516	-19.7283	-177.67	-132.104	165.532	160.543	Beta	Alpha-R	Beta	117.558	2.91386	2.99913	THR	PRO	2.99913	2.91386	4.53281	4.88261	4.30823	3.354	5.07716	3.65651	3.06541	4.50216	3.59131
7DK9	1.72	A	24	HELIX	HELIX	N/A	-108.079	120.252	-176.377	-160.971	-72.5592	-21.5435	172.63	-65.0617	-23.7542	-157.581	Beta	Alpha-R	Alpha-R	116.567	3.62516	3.05621	LEU	PRO	3.05621	3.62516	4.31463	4.58577	4.98044	3.98392	3.35324	5.21853	3.85182	3.11442	4.62531
7LFQ	2.7	A	98	N/A	SHEET	N/A	-54.149	126.034	-168.77	-179.029	-163.213	-178.865	-171.012	54.3782	36.2732	153.763	Beta	Beta	Alpha-L	112.235	2.97758	4.17976	ASN	GLY	4.17976	2.97758	5.01846	4.74243	4.32064	5.04843	3.60954	3.24138	4.60243	3.28984	3.3196
2ZZE	2.16	A	717	N/A	N/A	SHEET	-157.866	138.149	179.609	-175.527	-112.336	23.6539	-178.262	-76.902	125.003	-167.843	Beta	N/A	Beta	144.82	4.16633	3.84311	ALA	GLY	3.84311	4.16633	4.66343	4.32339	5.06203	3.27229	3.07797	4.82059	3.19081	3.34893	4.59843
2IMP	2.1	A	249	SHEET	SHEET	SHEET	-129.103	103.519	-175.717	-165.655	-123.91	143.151	175.818	-120.953	145.141	177.838	Beta	Beta	Beta	123.703	4.02361	3.9267	VAL	LEU	3.9267	4.02361	4.98679	4.51202	4.32676	5.5036	3.61891	4.39994	4.62944	3.07036	3.97984
5JF0	1.6	A	131	N/A	N/A	N/A	-137.892	127.095	-178.824	-159.141	-61.2411	-19.8092	179.636	-115.176	157.922	-175.007	Beta	Alpha-R	Beta	120.216	4.0551	3.01365	GLY	LEU	3.01365	4.0551	5.0137	4.57633	4.32861	5.07123	3.13951	4.29395	4.56156	3.153	4.12652
6S98	1.55	A	95	HELIX	HELIX	N/A	-41.4272	118.613	-173.615	-162.757	-72.2539	-34.43	-176.646	-90.7693	126.56	-179.428	Beta	Alpha-R	Beta	107.266	2.75909	3.05467	ILE	VAL	3.05467	2.75909	4.36114	4.84668	4.63974	3.99772	5.24569	3.48105	3.87011	4.57824	3.17236
1V3Y	1.81	A	102	N/A	N/A	N/A	-167.226	135.256	-178.117	-162.816	-65.5818	-21.8177	176.954	-130.692	-162.44	-173.461	Beta	Alpha-R	Beta	119.032	4.18043	3.0142	GLY	LEU	3.0142	4.18043	4.36804	4.91778	4.5968	3.94806	4.93012	3.06662	3.95357	4.50829	3.13281
3TTV	1.45	A	669	N/A	N/A	N/A	-71.7867	165.675	169.873	-178.278	166.1	-138.833	171.281	-76.3873	161.833	175.584	Beta	N/A	Beta	113.643	3.12267	4.19914	PRO	GLY	4.19914	3.12267	4.37547	4.73524	4.85275	3.10734	3.08993	4.72516	3.53549	3.36386	4.69217
4CPB	1.57	A	57	N/A	N/A	N/A	-131.424	118.261	-177.617	-170.396	-80.5316	-15.3863	-174.943	-61.2826	-26.9085	176.029	Beta	Alpha-R	Alpha-R	121.197	4.01421	3.31266	ILE	HIS	3.31266	4.01421	4.60445	5.10908	4.37697	3.34422	5.36849	3.76469	3.03632	4.74055	3.66665
2F1K	1.55	A	150	HELIX	HELIX	HELIX	-64.0702	-46.5754	179.43	-164.734	-61.6744	-43.7955	177.78	-62.2406	-37.6518	-179.641	Alpha-R	Alpha-R	Alpha-R	98.6688	2.94601	2.91829	ALA	LEU	2.91829	2.94601	5.00848	4.6522	4.38045	5.26976	3.8644	4.97114	4.64883	3.16812	3.87174
6BZZ	2.05	C	439	N/A	N/A	N/A	-77.6361	156.942	-173.694	174.909	-60.8088	-41.1246	177.86	96.296	-15.1152	173.631	Beta	Alpha-R	Alpha-L	104.442	3.25431	2.96485	GLY	LEU	2.96485	3.25431	5.0985	4.65148	4.38576	4.61925	3.06758	2.63144	4.65353	3.23757	3.1782
2Y44	1.65	A	148	N/A	N/A	HELIX	-71.7419	109.005	157.328	-175.926	-14.6746	-5.1974	-131.036	-111.46	12.6965	-167.248	Beta	N/A	N/A	89.392	3.00026	2.8072	THR	GLU	2.8072	3.00026	5.1464	4.74697	4.39008	5.2397	3.85395	3.40072	4.62976	3.25355	3.31699
2V1M	1	A	43	N/A	N/A	N/A	-122.619	152.116	-178.625	-176.872	-64.2565	-17.5196	178.167	-116.695	49.9889	179.28	Beta	Alpha-R	N/A	123.349	3.94165	3.00764	LYS	GLY	3.00764	3.94165	4.3982	4.98037	4.66078	3.11384	4.84493	3.21707	3.47157	4.69486	3.30372
4AIW	1.5	A	32	HELIX	HELIX	SHEET	-128.478	124.87	178.803	-178.436	-53.6564	-41.105	-177.436	-70.9509	149.507	-176.014	Beta	Alpha-R	Beta	106.118	3.97481	2.95238	LEU	LYS	2.95238	3.97481	4.55061	4.98062	4.39875	3.50466	5.28153	3.84559	3.1416	4.67089	3.72309
5TK4	1.46	A	114	N/A	N/A	N/A	-103.668	117.251	-176.691	165.775	-60.1992	-27.9759	-179.121	-133.69	162.47	162.646	Beta	Alpha-R	Beta	116.648	3.7737	2.9689	ILE	ARG	2.9689	3.7737	4.4004	4.64768	4.93584	3.155	4.24179	5.16073	3.05271	3.49005	4.5498
5H5Q	1.1	A	73	N/A	N/A	N/A	-105.068	151.489	174.799	-177.147	-53.5413	-31.3945	179.708	-122.102	38.541	174.705	Beta	Alpha-R	N/A	113.648	3.67254	2.93414	GLN	GLY	2.93414	3.67254	4.91693	4.65099	4.40687	4.89516	2.98169	3.41298	4.68672	3.18651	3.65223
2QPF	2.05	A	10	N/A	N/A	N/A	-77.0002	107.154	-171.928	-167.596	-88.4976	-10.6524	-179.334	-95.6739	7.73511	-174.113	Beta	Alpha-R	Alpha-R	125.491	3.23021	3.39136	LYS	PRO	3.39136	3.23021	4.60956	5.08175	4.41135	3.41059	5.28561	4.08233	2.98083	4.52273	3.79785
4RV8	2.05	A	219	N/A	HELIX	N/A	-81.2228	133.8	173.466	166.931	-127.257	18.1112	175.615	-102.582	15.6531	-175.422	Beta	N/A	Alpha-R	138.432	3.29994	3.96166	ILE	THR	3.96166	3.29994	4.41448	4.66039	5.07989	2.93451	3.2972	4.80187	3.15591	3.01872	4.45724
5BOS	1.71	A	57	N/A	N/A	N/A	-108.652	122.81	-176.347	-168.01	-61.366	-33.4676	-173.165	-139.961	118.516	-177.455	Beta	Alpha-R	Beta	108.992	3.65905	2.87202	VAL	ALA	2.87202	3.65905	4.41486	5.04549	4.63062	3.88184	5.19856	3.25892	3.83812	4.64364	3.07111
1O1Y	1.7	A	88	HELIX	HELIX	SHEET	67.5669	-117.653	172.902	-171.09	-51.3062	-40.5917	176.255	-118.29	129.722	171.602	PPII-R	Alpha-R	Beta	106.119	2.99017	2.80369	ILE	LEU	2.80369	2.99017	4.99318	4.41538	4.76651	4.71124	3.75586	2.83166	4.85089	3.59764	3.52003
3QQD	1.65	A	111	HELIX	N/A	HELIX	-68.1294	130.799	-176.105	-178.925	-106.207	0.210746	176.254	-97.8491	20.3367	-175.865	Beta	Alpha-R	Alpha-R	132.11	3.03749	3.70191	HIS	ILE	3.70191	3.03749	4.64418	5.03137	4.41573	3.36934	4.88058	3.1314	3.11784	4.51905	3.32741
7L8Q	1.48	A	46	N/A	N/A	N/A	-111.6	150.996	178.293	-174.358	-58.9346	-28.5567	177.846	-119.543	39.0548	178.776	Beta	Alpha-R	N/A	116.456	3.75461	2.98327	GLN	GLY	2.98327	3.75461	4.84484	5.10879	4.41659	3.2357	5.04654	3.28058	3.395	4.86539	3.60541
3WL5	1.6	A	172	HELIX	HELIX	SHEET	63.8787	-128.45	-179.595	-175.905	-58.1171	-31.5619	176.172	-116.208	141.453	172.185	PPII-R	Alpha-R	Beta	110.827	2.8267	2.8421	ILE	SER	2.8421	2.8267	4.75143	5.00978	4.41971	2.81867	4.72112	3.4839	3.60135	4.9267	3.54835
5JSY	1.04	B	489	HELIX	HELIX	N/A	-133.028	105.982	-174.008	-174.171	-82.3385	-18.4838	168.672	-64.4415	142.453	169.086	Beta	Alpha-R	Beta	117.631	4.01719	3.30222	PRO	LEU	3.30222	4.01719	4.42277	142.536	4.63504	3.66287	143.523	4.8621	3.05089	143.598	4.33034
2UYK	1.6	A	36	N/A	N/A	N/A	-73.9977	124.569	-172.234	-171.889	-64.8749	-26.1562	-179.57	-105.568	131.014	-178.18	Beta	Alpha-R	Beta	114.564	3.1302	3.03598	VAL	PRO	3.03598	3.1302	4.56877	4.42988	4.93102	3.29014	3.86425	5.11603	3.04227	3.80526	4.54354
2HHF	1.8	A	108	N/A	N/A	HELIX	-166.218	39.1161	-179.775	172.893	-65.5796	162.28	-179.641	-128.548	31.3414	10.513	N/A	Beta	N/A	77.7425	4.15921	3.48779	LEU	LEU	3.48779	4.15921	4.83875	4.46141	4.44585	6.00534	4.71417	5.14558	4.64829	3.25673	3.8331
5JMU	1.54	A	399	N/A	N/A	HELIX	-158.735	97.4612	176.937	-170.849	-57.3443	131.842	177.73	-116.641	-35.8242	178.417	Beta	Beta	N/A	100.63	4.14919	2.84042	TYR	PRO	2.84042	4.14919	4.44723	5.28135	4.48022	4.33285	5.3747	3.37567	3.88951	4.53162	2.84674
5ELA	2.28	A	20	HELIX	HELIX	N/A	-81.6344	117.828	-179.382	-167.477	-69.8378	-26.8294	175.766	-112.601	28.2075	-177.901	Beta	Alpha-R	N/A	115.82	3.14418	3.19479	ASP	PRO	3.19479	3.14418	4.84727	4.47128	4.45268	5.13392	3.24918	4.33321	4.40879	3.00198	4.11273
7D54	1.85	A	99	HELIX	HELIX	SHEET	57.4534	-116.461	173.189	-175.439	-44.17	-38.6215	-179.625	-120.065	121.566	176.519	PPII-R	Alpha-R	Beta	106.283	2.93768	2.80319	VAL	PHE	2.80319	2.93768	4.90551	4.74023	4.4584	4.59079	3.04162	3.13012	4.64202	3.73949	3.18841
6Q3F	1.18	A	177	N/A	N/A	N/A	-58.0432	135.82	-178.404	-167.501	-84.2887	-31.5929	-162.335	94.7975	10.783	176.901	Beta	Alpha-R	Alpha-L	114.628	2.84029	3.38344	GLY	LYS	3.38344	2.84029	4.66219	4.45963	5.11249	3.13728	4.14537	5.26828	3.29602	4.0989	4.82132
3GS9	1.7	A	27	SHEET	SHEET	N/A	-133.31	131.277	170.844	-178.471	-112.972	127.16	-174.92	-72.4119	121.244	-169.689	Beta	Beta	Beta	124.266	3.96048	3.82912	PHE	GLU	3.82912	3.96048	4.90113	4.49695	4.46221	4.96289	3.13333	3.62636	4.4427	2.92229	3.64937
6V7G	1.4	A	285	SHEET	SHEET	SHEET	-136.424	118.186	-175.896	-175.062	-107.584	130.323	175.49	-128.05	160.4	-176.874	Beta	Beta	Beta	120.455	4.07036	3.73319	ASN	LEU	3.73319	4.07036	4.54459	4.92501	4.47201	3.39122	5.28409	4.06465	3.02931	4.57228	3.8945
1ZB9	1.8	A	61	HELIX	HELIX	HELIX	-72.3985	-32.7253	179.641	-179.485	-60.4919	-34.0986	178.278	-60.4567	-44.6157	-179.23	Alpha-R	Alpha-R	Alpha-R	107.416	3.03255	2.83479	ALA	PHE	2.83479	3.03255	4.49049	5.04124	4.5664	4.80333	5.20142	3.61863	3.5921	4.4093	2.84963
1DEK	2	A	55	N/A	N/A	N/A	-93.6984	109.951	178.72	-140.568	-101.052	126.088	179.497	-59.2996	150.428	-179.121	Beta	Beta	Beta	121.442	3.42663	3.64069	PRO	LEU	3.64069	3.42663	47.5188	4.50365	5.48135	48.0847	3.8668	5.806	47.4436	3.87736	5.21149
3ZXO	1.9	A	524	SHEET	SHEET	SHEET	-132.696	120.844	178.517	-173.475	-114.808	116.202	-176.27	-107.691	130.108	-175.299	Beta	Beta	Beta	132.147	3.96052	3.84532	LEU	ILE	3.84532	3.96052	4.51288	4.56787	5.06222	4.19004	3.27857	5.21596	3.99634	3.03928	4.57491
5D9V	1.69	A	20	HELIX	HELIX	N/A	-62.2031	115.739	-171.421	-172.492	-72.4772	-21.1446	178.297	-112.524	13.5104	-176.691	Beta	Alpha-R	N/A	118.072	2.91332	3.05745	ASP	PRO	3.05745	2.91332	4.97052	4.52118	4.5251	5.21144	3.28408	4.35172	4.44755	2.93449	4.03607
3PNX	1.92	A	120	SHEET	HELIX	SHEET	-59.0655	121.931	-174.433	177.08	-58.259	-46.3347	179.785	-110.627	124.949	178.621	Beta	Alpha-R	Beta	103.268	2.95499	2.91721	ALA	GLN	2.91721	2.95499	4.77928	5.00646	4.53669	3.9528	5.07153	3.24676	3.41802	4.54954	3.27608
1LM4	1.45	A	111	N/A	N/A	N/A	-159.924	137.478	178.028	-175.757	-58.0595	-22.2	179.641	-120.965	179.812	-177.62	Beta	Alpha-R	Beta	119.41	4.14707	2.89596	GLY	LEU	2.89596	4.14707	4.54947	69.4365	5.03573	2.94419	66.3199	4.91938	3.01262	67.2871	4.5376
5HLH	3	A	13	HELIX	HELIX	HELIX	-48.2339	-59.0326	-166.449	154.331	-61.8961	-47.9989	175.417	-93.0693	-42.2991	169.161	Alpha-R	Alpha-R	Alpha-R	99.1863	2.71929	2.93236	LEU	PHE	2.93236	2.71929	5.09525	5.07939	4.56912	4.85181	4.3307	3.07642	4.15339	4.30496	2.8144
7R66	1.44	A	100	N/A	N/A	SHEET	66.2488	-114.937	176.053	177.503	-84.8781	-4.91978	-179.303	-144.16	145.513	167.742	PPII-R	Alpha-R	Beta	130.365	3.04459	3.41442	ILE	HIS	3.41442	3.04459	5.09884	4.95455	4.69119	4.57623	2.90323	3.47591	4.8293	3.73804	3.5628
4Y1R	1.65	A	105	N/A	N/A	SHEET	75.6272	-107.822	171.473	176.819	-82.4553	-14.3603	-178.554	-123.459	137.812	169.565	PPII-R	Alpha-R	Beta	130.482	3.20218	3.31936	ILE	HIS	3.31936	3.20218	5.03006	4.7171	4.97009	3.77637	2.92663	4.6751	3.76492	3.58183	4.76434
